# Supplementary material for: Establishment of Patient-Derived Tumor Xenograft Models of Epithelial Ovarian Cancer for Preclinical Evaluation of Novel Therapeutics
Source: Oxford University Press journal article supplement (doi:10.1158/1078-0432.ccr-16-1237), 2016-08-29
Supplement: 10780432ccr161237-sup-166420_1_supp_3571759_xx7nnb.docx [file 10780432ccr161237-sup-166420_1_supp_3571759_xx7nnb.docx]

**Supplementary Data**

1. Supplemental Table 1: Optimal conditions for PDX model luciferization

2. Supplemental Table 2: Array CGH characterization of PDX models

2. Supplemental Table 3: BROCA characterization of PDX models

3. Supplemental Table 4: Somatic Sequence Alterations in parental tumor and xenograft DF101

4. Supplemental Table 5: Somatic Sequence Alterations in parental tumor and xenograft DF149

5. Supplemental Table 6: PIK3CA FISH in PDX models

6. Supplemental Figure 1: Schema for PDX model generation and luciferization

7. Supplemental Figure 2: IHC characterization through multiple passages of DF68 PDX

8. Supplemental Figure 3: Array CGH comparison between parental, initial PDX, and luciferized PDX cells in DF86

9. Supplemental Figure 4: PI3K pathway activation analysis from PDX RPPA samples

10. Supplemental Figure 5: Correlation between BLI and plasma CA125 biomarker levels in DF14-Luc

Supplemental Table 1: Luciferization conditions for DF PDX models

| **DF ID** | **Infection method** | **Puromycin concentration (ug)** | **Days in puromycin** | **Day / Luc counts** | **% viable cells / ATP assay** | **Medium** | **Days between collection and re-implantation** |
| --- | --- | --- | --- | --- | --- | --- | --- |
| DF09 | Poly / 2x accutase | 2.5 | 5 | 7 / 1949 | 9.20% | RPMI | 8 |
| DF14 | Poly / 2x spinfect 600g x 30’ | 2.5 | 5 | 7 / 19,837 | 9-12% | WIT-P | 8 |
| DF20 | Poly / 2x mix shake & direct, accutase | 4 | 5 | 8 / 8290 | 12.2-13% | R+P | 8 |
| DF59 | Poly / 2x direct, accutase | 2 | 8 | 12 / 3146 | 25.8-64.3% | RPMI | 12 |
| DF68 | Poly / 2x direct, accutase | 2.5 | 4 | 7 / 1087 | 3.7-10% | R+P | 8 |
| DF83 | Poly / 2x direct, accutase | 5 | 4 | 7 / 34,481 | 14-45% | WIT-P | 7 |
| DF86 | Poly / 2x shake 30’, accutase | 2.5 | 5 | 7 / 32,897 | 5.6-23.3% | R+P | 8 |
| DF101 | Poly / 1x direct, accutase | 2.5 | 4 | 7 / 2356 | 1.3-8.4% | RPMI | 9 |
| DF106 | Poly / 1x shake, accutase | 5 | 4 | 6 / 399 | 4.1-61% | WIT-P | 7 |
| DF118 | Poly / 2x direct | 2 | 8 | 10/ 22,600 | 3.65-5.92% | WIT-T | 11 |
| DF149 | Poly / 2x direct | 5 | 10 | 9 / 3145 | N/A | WIT-P | 12 |
| DF172 | Poly / 2x direct, accutase | 3 | 4 | 5 / 115,807 | 3.4-55% | RPMI | 8 |
| DF181 | Poly / 2x mix | 3 | 6 | N/A | N/A | WIT-P1 | 10 |
| DF216 | Poly / 2x direct | 2 | 3 | N/A | N/A | RPMI | 7 |

Supplemental Table 3: BROCA characterization of PDX models

| **DF ID** | **Patient Tumor** | **Variant Allelic Fraction (Tumor)** | **Luciferized PDX** | **Variant Allelic Fraction**  **(PDX)** |
| --- | --- | --- | --- | --- |
| DF20 | TP53 | 0.15 | TP53 | 0.99 |
|  |  | PTEN | 0.13, 0.05, 0.05, 0.04  (multiple variants) |
|  |  | PPM1D | Unknown |
| DF68 | TP53 | 0.44 | TP53 | 1 |
| BRCA1 | 0.80 | BRCA1 | 1 |
| PTEN copy loss | -- | PTEN copy loss | -- |
| DF83 | TP53 | 0.9 | TP53 | 0.96 |
| CDKN2A copy loss |  | CDKN2A copy loss |  |
|  |  | SDHC | 0.03 |
| DF86 | TP53 | 0.92 | TP53 | 1 |
| BRCA1 copy loss of last 5 exons | -- | BRCA1 copy loss of last 5 exons | -- |
|  |  | APC (mutation conserves amino acid sequence) | 0.29 |
| DF101 | TP53 | 0.99 | TP53 | 0.99 |
| BRCA1 | 0.97 | BRCA1 | 0.97 |
| NBN | Unknown | NBN | Unknown |
| PTEN copy loss |  | PTEN copy loss |  |
| DF106 | TP53 | 0.76 | TP53 | 0.99 |
| CDKN2A copy loss |  | CDKN2A copy loss |  |
| DF118 | TP53 | 0.78 | TP53 | 0.99 |
| DF149 | TP53 | 0.68 | TP53 | 0.98 |
| DF172 | TP53 | 0.83 | TP53 | 0.98 |
|  |  | RET | 0.1 |
|  |  | RAD51C | Unknown |
| DF181 | TP53 | 0.27 | TP53 | 0.94 |
| BRIP1 | 0.62 | BRIP1 | 0.94 |
| DF216 | TP53 | ~0.75 (manual estimate) | TP53 | ~1 (manual estimate) |

Supplemental Table 6: PIK3CA FISH of PDX models

| **DF ID** | **PIK3CA:CEP3 ratio** | **Status** |
| --- | --- | --- |
| DF09 | 1.05 | No gain |
| DF14 | 1.04 | No gain |
| DF20 | 2.5 | Amplification |
| DF59 | 1.76 | Gain |
| DF68 | 1.5 | Gain |
| DF83 | 0.96 | No gain |
| DF86 | 2 | Amplification |
| DF101 | 1.28 | No gain |
| DF106 | 2 | Amplification |
| DF118 | 1.14 | No gain |
| DF149 | 1.2 | No gain |
| DF172 | 1.68 | Gain |
| DF181 | 1.54 | Gain |
| DF216 | 1.6 | Gain |

Supplemental Figure 1. Schema for PDX model generation and luciferization


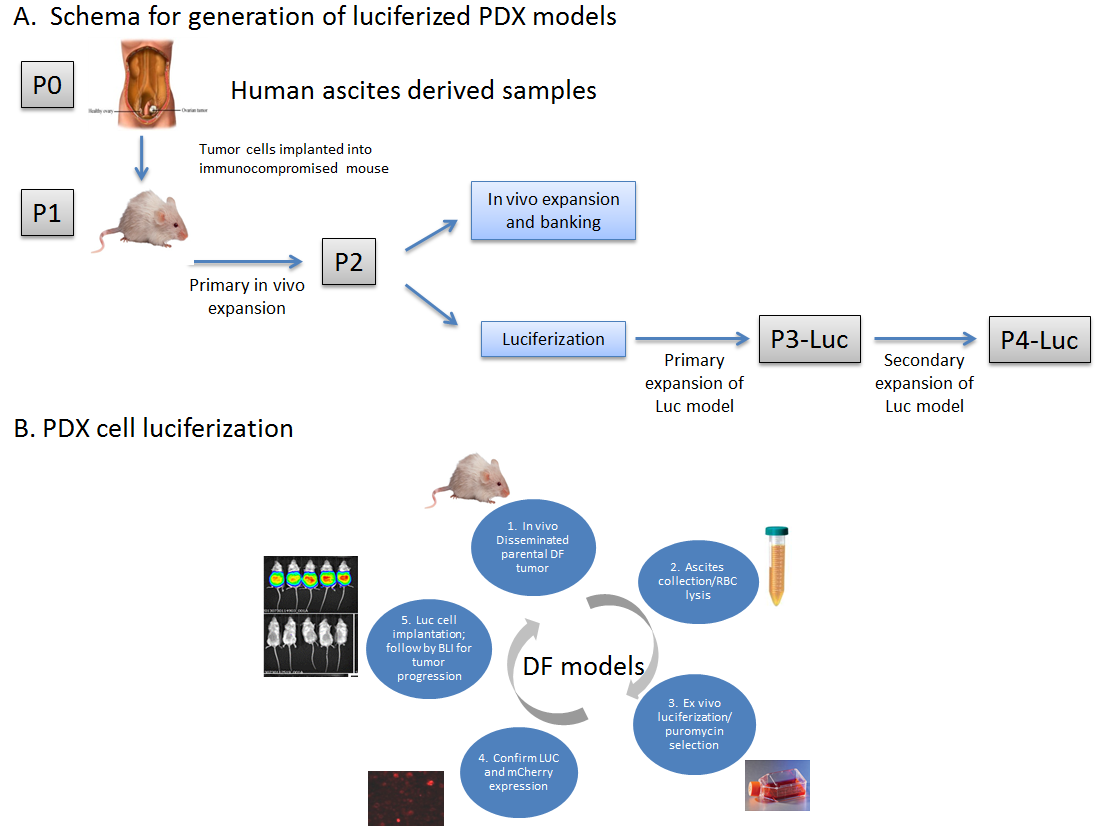


Supplemental Figure 2. IHC characterization through multiple passages of DF68 PDX


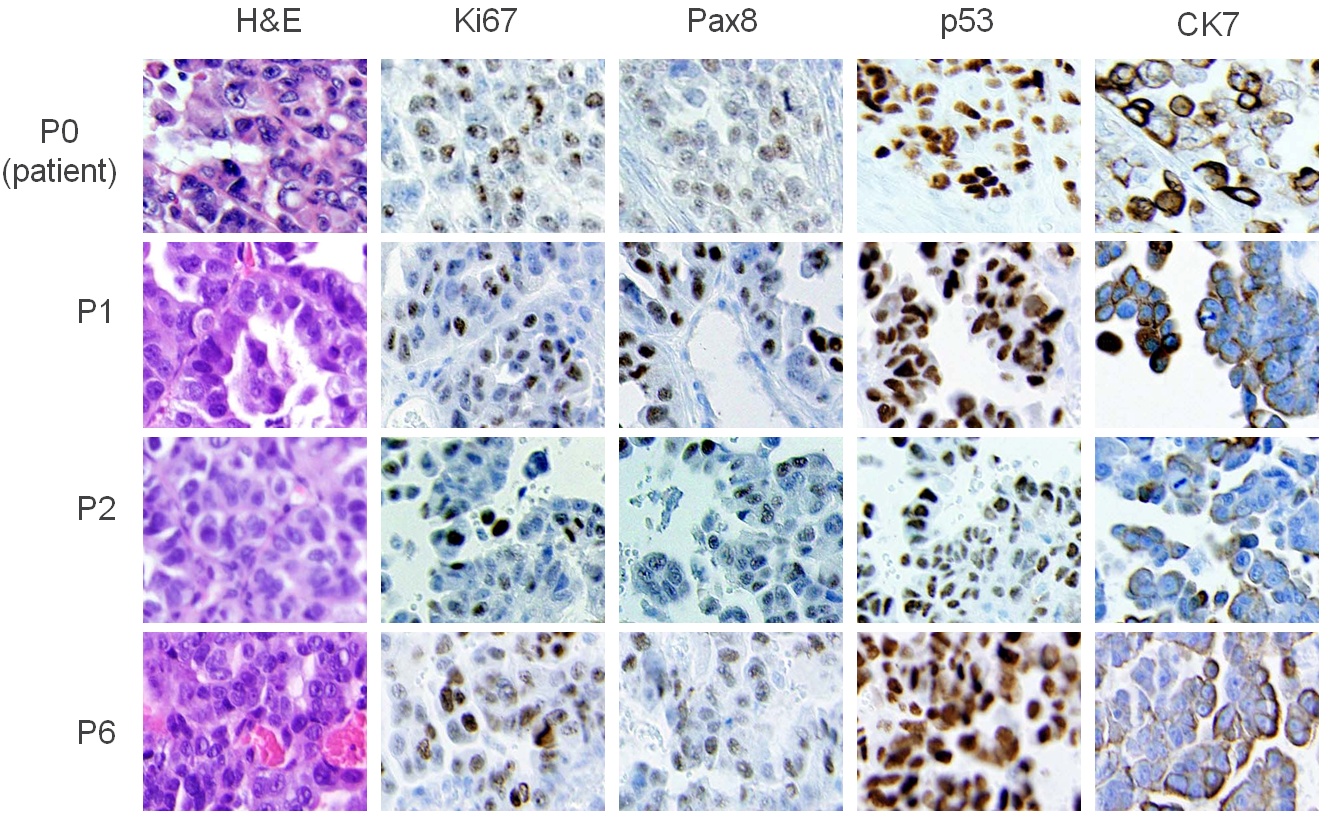


Supplemental Figure 3. Array CGH comparison between patient tumor, pre-luciferized PDX, and luciferized PDX cells in DF86


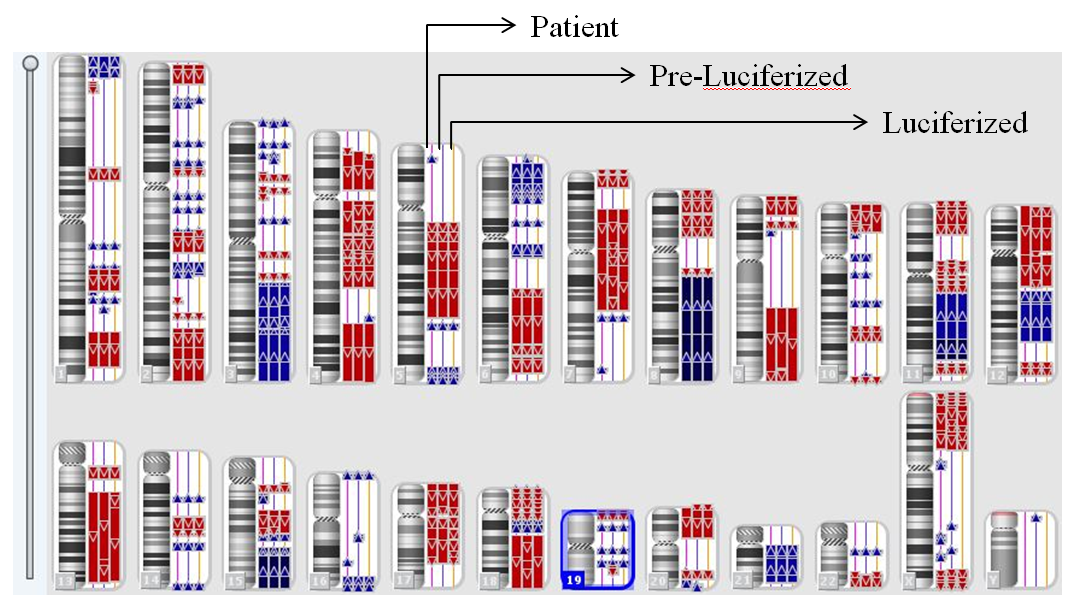


Copy number variation (CNV) analysis was performed on DNA extracted from the original patient tumor, the pre-luciferized PDX tumor cells, and the luciferized PDX tumors. A chromosome view map indicates overall high preservation of copy number alterations between the pre-luciferized and luciferized PDX models and the original patient tumor.

Supplemental Figure 4. PI3K pathway activation clustering analysis from PDX RPPA samples


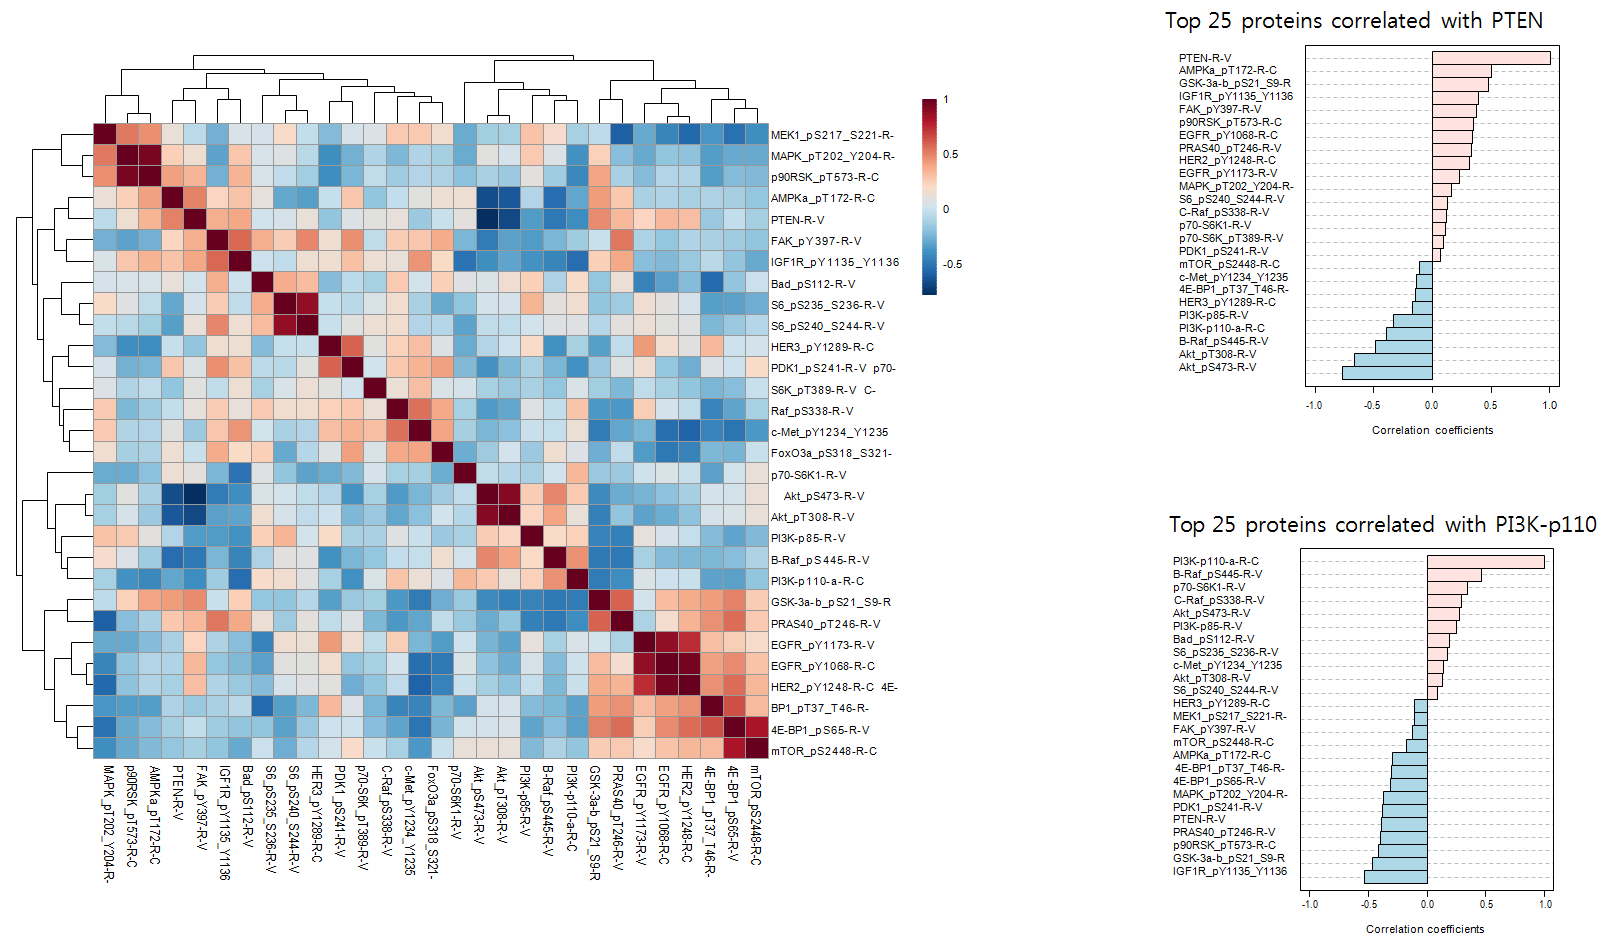


A.

B.

C.

Clustering analysis shows a strong correlation between phosphoproteins that are adjacent in known canonical pathways, supporting that the RPPA analysis is of high quality. A. Phosphorylation readouts cluster as canonical signaling modules in a correlation heat map. B, C. Spearman correlations for the top 25 correlated proteins to PTEN and to PI3K-p110.

Supplemental Figure 5. Correlation between CA125 concentration and BLI signal in DF14-Luc mice


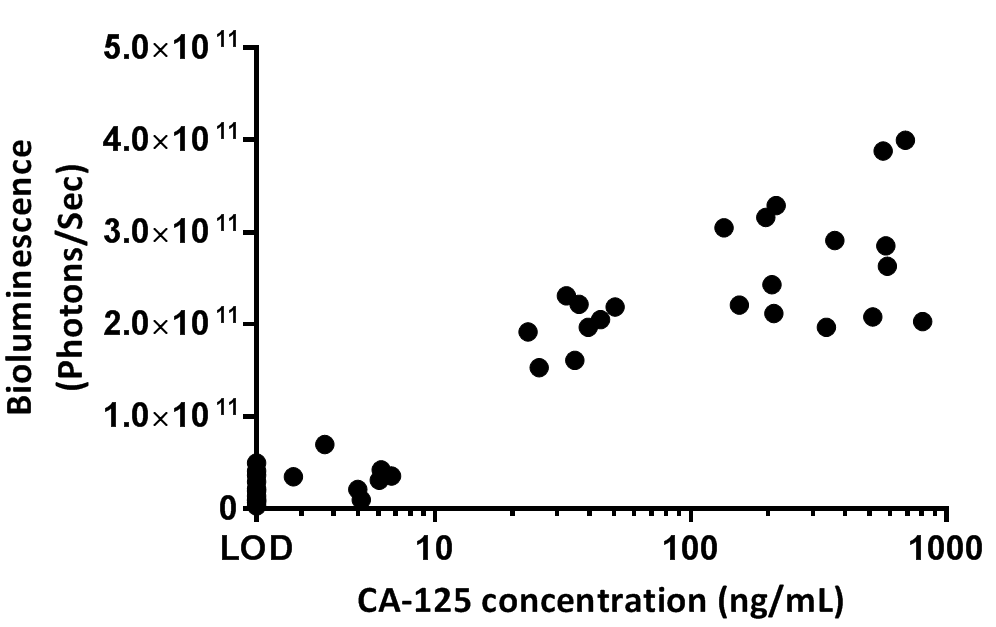


Spearman r = 0.73, p <0.0001

Mouse plasma CA125 levels are correlated with BLI signals in DF14-Luc mice.
