# Supplementary material for: Establishment of Patient-Derived Tumor Xenograft Models of Epithelial Ovarian Cancer for Preclinical Evaluation of Novel Therapeutics
Source: Oxford University Press journal article supplement (doi:10.1158/1078-0432.ccr-16-1237), 2016-08-29
Supplement: 10780432ccr161237-sup-166420_1_supp_3571760_447nnc.xlsx [file 10780432ccr161237-sup-166420_1_supp_3571760_447nnc.xlsx]

## Sheet: SuppTableRaw.txt
Symbol	Chromosome	Cytoband	Associated Gene Identifiers	DF09_parental	DF09_luc	DF59_P0	DF86_luc	DF14_parental	DF68_parental	DF68_luc	DF20_luc	DF172_parental	DF83_P0	DF216_luc	DF118_luc	DF09_P0	DF106_parental	DF101_P0	DF83_luc	DF149_P0	DF101_luc	DF86_parental	DF20_P0	DF181_P0	DF20_parental	DF216_P0	DF106_luc	DF101_parental	DF172_luc	DF68_P0	DF181_parental	DF118_parental	DF149_luc	DF83_parental	DF59_parental	DF86_P0	DF172_P0	DF106_P0	DF59_luc	DF216_parental	DF149_parental	DF14_luc	DF181_luc	DF118_P0
A1BG	19	q13.43	ENST00000263100 // Hs.529161 // A1BG // 1 // alpha-1-B glycoprotein	0.3312	0.332275	-0.0664979	0.143596	0.298774	0.0976286	0.162603	-0.041873	0.32329	0.139374	0.292885	0.495192	0.18169	0.43416	-0.266743	0.162013	0.378717	-0.261771	-0.101104	0.278392	0.219898	0.0330777	0.188673	0.47931	-0.210729	0.203585	0.219541	0.278517	0.477536	0.352579	0.239619	0.070795	0.0229121	0.0776384	0.484711	0.0739661	0.262585	0.29393	0.236137	0.229569	0.316027
A1CF	10	q11.23	ENST00000282641 // Hs.282795 // A1CF // 29974 // APOBEC1 complementation factor	0.256705	0.258584	-0.206443	0.15965	0.255672	0.180294	0.204953	0.176871	-0.093139	0.0538146	0.220178	-0.290095	0.0831421	-0.455275	-0.421236	0.0511479	1.3188	-0.455923	0.149344	0.0311405	-0.158567	0.15794	0.163927	-0.287195	-0.429157	-0.0986376	0.0431848	-0.536656	-0.254981	1.38251	-0.475033	-0.235307	0.130699	0.0158497	-0.398054	-0.115746	0.174199	1.34111	0.174976	-0.469536	-0.188317
A2M	12	p13.31	ENST00000318602 // Hs.212838 // A2M // 2 // alpha-2-macroglobulin	0.246325	0.283787	0.325525	-0.427821	0.268533	-0.396719	-0.353805	-0.430984	-0.0604226	0.821004	0.410002	0.0226878	-0.392151	-0.309413	-0.396631	0.895427	0.247104	-0.45673	-0.384998	-0.154167	-0.0608741	-0.429069	0.354689	0.116196	-0.397767	-0.101045	-0.290155	-0.0288463	-0.0277536	0.334239	-0.0231719	0.310648	-0.377239	-0.24267	-0.346525	0.311765	0.327154	0.331473	0.249351	-0.00516897	-0.00883394
A2ML1	12	p13.31	ENST00000537475 // Hs.620532 // A2ML1 // 144568 // alpha-2-macroglobulin-like 1	0.240184	0.259128	0.259117	-0.347612	0.272273	-0.357731	-0.306668	-0.330043	-0.123279	0.441077	0.381972	-0.0135101	-0.248363	-0.305286	-0.385391	0.424707	0.261918	-0.423225	-0.343249	-0.0633584	-0.016536	-0.361913	0.36345	0.0866088	-0.388308	-0.133932	-0.218272	-0.0924902	-0.00406695	0.25092	-0.0406084	0.306885	-0.326846	-0.187448	-0.279969	0.305957	0.272755	0.214687	0.264687	-0.0438333	0.00521226
A4GALT	22	q13.2	ENST00000249005 // Hs.105956 // A4GALT // 53947 // alpha 1,4-galactosyltransferase	-0.194157	-0.21008	-0.226996	-0.446286	-0.0178891	-0.0639159	-0.0471443	-0.250628	-0.109589	-0.17504	-0.323384	-0.402697	0.0998981	-0.405381	-0.315315	-0.272141	-0.522113	-0.295565	-0.386632	-0.030894	-0.0232526	-0.224233	0.0393737	-0.125621	-0.33441	-0.151066	-0.116694	-0.13206	-0.393797	-0.728692	-0.0680351	-0.213049	-0.3351	-0.17985	-0.310255	-0.113693	-0.0789775	-0.73792	-0.0560419	-0.0935243	-0.283029
A4GNT	3	q22.3	ENST00000236709 // Hs.278960 // A4GNT // 51146 // alpha-1,4-N-acetylglucosaminyltransferase	0.0544628	-0.00196561	0.327654	0.312933	-0.203475	0.426226	0.450036	0.318362	0.553507	0.451717	0.2278	0.289898	0.377891	0.321761	0.481609	0.455625	0.210698	0.458732	0.350604	0.0211953	0.107377	0.367244	0.296178	0.250151	0.460202	0.5499	0.333267	0.41738	0.268906	0.200833	0.436744	0.293727	0.339211	0.441148	0.357158	0.238202	0.274227	0.197935	-0.19399	0.385326	0.14607
AAAS	12	q13.13	ENST00000209873 // Hs.369144 // AAAS // 8086 // achalasia, adrenocortical insufficiency, alacrimia	-0.164281	-0.208516	-0.018619	-0.302689	-0.0963124	-0.0897608	-0.0669192	0.0601419	-0.120235	-0.510315	0.236094	0.0288691	-0.0646672	-0.00301088	-0.117807	-0.416522	-0.150557	-0.15417	-0.194495	-0.00306992	0.0380935	0.0519458	0.0401643	0.00517292	-0.138158	-0.113152	-0.128108	-0.0258164	0.0255122	-0.215887	-0.0240456	-0.00462224	-0.283947	-0.183838	0.0089874	-0.0236499	0.128255	-0.212413	-0.0238092	-0.0072068	-0.0309012
AACS	12	q24.31	ENST00000261686 // Hs.656073 // AACS // 65985 // acetoacetyl-CoA synthetase	0.0925947	0.0834243	-0.190863	-0.446832	0.0195382	0.348952	0.332183	0.169646	0.284858	-0.129334	0.0205587	0.0414	-0.0614881	0.0347685	-0.287405	-0.274941	-0.137939	-0.313136	-0.413556	0.0261624	0.0983795	0.167113	0.050935	0.0698537	-0.283195	0.249452	0.259754	-0.00217139	0.0522277	-0.217655	0.0276866	-0.117145	-0.400986	-0.108055	0.104807	-0.128624	0.120831	-0.187356	0.00415171	-0.0438063	0.0496863
AADAC	3	q25.1	ENST00000232892 // Hs.506908 // AADAC // 13 // arylacetamide deacetylase (esterase)	-0.367951	-0.352138	0.470625	0.377412	-0.757015	0.788995	0.669387	0.659956	0.646705	0.450212	0.193543	0.282366	0.546589	0.570671	0.528971	0.468379	0.309122	0.526101	0.376844	0.110252	0.241883	0.704575	0.346194	0.696983	0.45272	0.514977	0.494562	0.47444	0.339139	0.34373	0.443358	0.55457	0.45087	0.445169	0.547149	0.549162	0.3121	0.302004	-0.994661	0.428075	0.160623
AADACL2	3	q25.1	ENST00000445270 // Hs.144710 // AADACL2 // 344752 // arylacetamide deacetylase-like 2	-0.237315	-0.259612	0.50399	0.341807	-0.624046	0.666302	0.604005	0.58128	0.548961	0.373845	0.202206	0.241764	0.485919	0.560692	0.394538	0.406888	0.228945	0.408925	0.365417	0.0759902	0.158862	0.623384	0.287002	0.595143	0.368683	0.496288	0.438982	0.494631	0.197008	0.304024	0.428362	0.551752	0.369416	0.404008	0.543795	0.513602	0.235278	0.256301	-0.741541	0.432927	0.111848
AADACL3	1	p36.21	ENST00000332530 // Hs.464705 // AADACL3 // 126767 // arylacetamide deacetylase-like 3	0.0713388	0.0275514	-0.213112	0.381441	0.181711	0.290696	0.110397	0.262811	0.513182	-0.217458	0.0410169	0.036396	0.217211	0.0511265	0.165444	-0.221627	0.422914	0.156166	0.332622	-0.0334866	-0.00041105	0.35124	-0.010545	0.127629	0.159017	0.476919	0.109831	-0.0578619	0.0737528	0.50744	-0.0860499	-0.184929	0.427251	0.120419	0.0915554	-0.262273	0.00905785	0.392237	0.159504	-0.0209711	-0.0042346
AADACL4	1	p36.21	ENST00000376221 // Hs.209954 // AADACL4 // 343066 // arylacetamide deacetylase-like 4	0.0134919	-0.018803	-0.217371	0.375721	0.19875	0.338735	0.210369	0.310931	0.49994	-0.186455	0.0586358	0.0555575	0.312792	0.122799	0.160359	-0.192402	0.461093	0.165682	0.379191	0.0703813	-0.00865914	0.401017	0.0385556	0.156105	0.165223	0.541614	0.180722	-0.0533045	0.0612806	0.491295	-0.0741797	-0.163054	0.423385	0.129583	0.111982	-0.194681	0.0392625	0.414425	0.239628	-0.0053094	-0.000566982
AADAT	4	q33	ENST00000337664 // Hs.529735 // AADAT // 51166 // aminoadipate aminotransferase	-0.196961	-0.217558	0.0690433	-0.44933	-0.237683	-0.377211	-0.355631	-0.378634	-0.0366212	-0.617682	0.0181198	0.0237452	-0.0963455	-0.435417	-0.480582	-0.618408	-0.208228	-0.489379	-0.449461	-0.04251	-0.0249408	-0.401078	-0.0318503	-0.391529	-0.464987	-0.0686366	-0.273718	-0.0140236	0.0226717	-0.279381	-0.0333367	0.136742	-0.44533	-0.213656	-0.319314	0.139029	0.0122535	-0.254734	-0.204822	-0.0275524	-0.037528
AAED1	9	q22.33	ENST00000375233 // Hs.44640 // AAED1 // 195827 // AhpC/TSA antioxidant enzyme domain containing 1	-0.319281	-0.272307	-0.296916	-0.494504	-0.4202	0.0793102	0.070294	0.127265	-0.10676	-0.196135	0.140678	0.105706	-0.0951034	-0.0403017	-0.399778	-0.285504	0.179809	-0.439279	-0.424885	-0.0664257	-0.160897	0.0173989	0.183513	-0.268988	-0.466482	-0.148599	0.0441401	-0.720035	0.0197791	0.225525	-0.63074	-0.351639	-0.398054	-0.239645	0.0534034	-0.649077	0.0462809	0.137759	-0.387388	-0.538173	-0.0295434
AAGAB	15	q23	ENST00000261880 // Hs.254642 // AAGAB // 79719 // alpha- and gamma-adaptin binding protein	-0.289716	-0.260194	0.266026	0.0727562	-0.297589	-0.424221	-0.387163	-0.169412	-0.0909456	-0.182402	-0.00715015	0.00213123	-0.343466	0.111126	-0.383203	-0.212051	-0.246983	-0.416103	0.04193	-0.0349728	0.0720623	0.0301671	-0.0227662	0.146966	-0.388678	-0.0625053	-0.331603	0.29536	-0.00870808	-0.269002	0.264427	0.329622	0.0516928	-0.0663765	0.0758124	0.340635	-0.10699	-0.25838	-0.265581	0.266134	0.14711
AAK1	2	p13.3	ENST00000406297 // Hs.468878 // AAK1 // 22848 // AP2 associated kinase 1	0.28258	0.250213	0.227577	0.0743835	0.170668	-0.0422354	-0.049498	-0.264084	-0.0919529	0.326234	0.255423	0.0121717	0.0825833	0.0869528	0.161294	0.3163	0.0430952	0.126159	0.0772446	0.00208884	-0.0433157	-0.103906	0.198641	0.13333	0.143389	-0.0656406	-0.125489	-0.0374576	0.0140894	0.059419	-0.018272	0.11051	0.0654628	0.0317066	0.0879381	0.0912201	0.246962	0.0431869	0.16691	-0.0196574	0.000429485
AANAT	17	q25.1	ENST00000250615 // Hs.431417 // AANAT // 15 // aralkylamine N-acetyltransferase	0.16602	0.0924794	0.0698147	0.070396	0.0167896	0.230101	0.103659	0.287698	0.268366	-0.267414	-0.0474378	-0.10065	-0.137861	-0.0302737	-0.255642	-0.0793352	0.139092	-0.322396	0.0716972	0.0222371	0.0598771	0.249928	-0.0199674	0.134337	-0.265589	0.261067	0.0986737	0.29296	-0.0220265	0.24597	0.320295	-0.0215477	0.0653098	-0.0719803	0.0143705	-0.0569336	-0.0243765	0.178506	-0.0215275	0.314612	-0.001567
AARD	8	q24.11	ENST00000378279 // Hs.437551 // AARD // 441376 // alanine and arginine rich domain containing protein	0.257575	0.071052	0.462132	0.676115	0.464183	0.166341	0.128775	0.620935	0.310199	0.116439	0.628923	0.174836	0.231634	0.635901	0.475914	0.131519	-0.139416	0.335346	0.723829	0.230636	0.259329	0.631653	0.759575	0.81412	0.456589	0.332058	0.0674421	0.614062	0.213343	-0.219351	0.614388	0.523912	0.626115	0.0667704	0.595307	0.492222	0.751525	-0.20978	0.43579	0.549543	0.0808412
AARS	16	q22.1	ENST00000261772 // Hs.315137 // AARS // 16 // alanyl-tRNA synthetase	0.299238	0.285773	0.337327	0.131183	0.228697	-0.0756789	-0.0706783	-0.388783	-0.0648627	-0.200896	-0.995357	-0.557465	-0.0819521	-0.482703	-0.28398	-0.251129	-0.430962	-0.333319	0.117487	-0.0993941	-0.0888644	-0.44249	-0.768928	-0.501328	-0.317152	-0.109019	-0.114692	-0.186043	-0.456547	-0.910006	-0.0748914	0.208258	0.0836037	-0.14463	-0.391042	0.202329	-0.937902	-0.757127	0.233957	0.0214093	-0.374343
AARS2	6	p21.1	ENST00000244571 // Hs.158381 // AARS2 // 57505 // alanyl-tRNA synthetase 2, mitochondrial (putative)	0.121893	0.092988	0.280127	0.130351	0.157051	-0.0301181	-0.0295603	0.473425	0.186862	0.190518	-0.240326	0.12314	-0.0634599	0.194812	-0.265194	0.161051	0.0678072	-0.2921	0.157262	0.168158	0.179259	0.385062	-0.151519	0.325523	-0.181589	0.180629	0.0175694	0.330794	0.132705	0.0911251	0.391089	0.313377	0.117434	0.427645	0.160264	0.418259	-0.224525	0.174544	0.301775	0.354902	0.214783
AARSD1	17	q21.31	ENST00000360221 // Hs.317403 // AARSD1 // 80755 // alanyl-tRNA synthetase domain containing 1	0.0859879	0.0761883	-0.256744	-0.633773	0.0215053	0.106957	-0.116052	0.261085	-0.21468	-0.245955	-0.140586	-0.57947	-0.458677	-0.136603	-0.419067	-0.230217	-0.0398176	-0.41328	-0.562766	-0.0942666	-0.15453	0.0744728	0.0355948	-0.00121524	-0.409576	-0.206055	-0.0107652	-0.29874	-0.575945	-0.0427517	-0.198155	-0.255618	-0.553418	-0.133235	-0.0616882	-0.330227	-0.00898884	-0.1771	0.102746	-0.168252	-0.529727
AASDH	4	q12	ENST00000205214 // Hs.104347 // AASDH // 132949 // aminoadipate-semialdehyde dehydrogenase	-0.0423452	0.0255569	-0.165116	-0.254844	0.0373209	0.248394	0.268827	0.205645	-0.119136	-0.182454	-0.171643	0.0111991	-0.0177142	0.0266074	0.158601	-0.169147	-0.106442	0.207288	-0.290061	0.00313032	0.127213	0.309372	-0.147547	0.117552	0.149507	-0.067072	0.118258	0.0155304	-0.00128889	-0.151493	0.0349003	-0.118337	-0.285327	-0.100288	0.0760628	-0.214025	-0.214624	-0.265862	0.063285	-0.0195423	0.0311558
AASDHPPT	11	q22.3	ENST00000278618 // Hs.524009 // AASDHPPT // 60496 // aminoadipate-semialdehyde dehydrogenase-phosphopantetheinyl transferase	0.353575	0.356708	0.0601153	0.617377	0.473558	0.225246	0.103168	-0.270706	0.129366	0.504001	0.0919275	-0.164697	-0.0422533	-0.139892	0.445935	0.522672	0.127279	0.127865	0.634957	0.0269305	-0.00246226	-0.329568	0.0885645	-0.295335	0.272333	0.105881	0.0867549	0.00496368	-0.163999	0.126346	0.0656076	-0.153631	0.65202	0.124379	-0.255057	-0.223248	0.0709265	0.230196	0.467218	0.0516183	-0.0420598
AASS	7	q31.32	ENST00000358954 // Hs.156738 // AASS // 10157 // aminoadipate-semialdehyde synthase	0.250019	-0.215804	0.145987	0.145078	0.290964	0.230442	0.414397	0.0810988	-0.029355	0.0778823	0.0411679	0.0109643	0.145405	-0.394743	0.446394	0.0527596	0.20211	0.447812	0.138652	0.0231041	0.012149	0.195253	0.029475	-0.395199	0.449233	-0.0424212	0.152264	-0.0549459	0.0345042	0.0880414	-0.025883	-0.120888	0.101331	0.0475237	-0.379847	-0.0257932	0.00201613	0.140405	0.307886	-0.0186928	0.0619946
AATF	17	q12	ENST00000225402 // Hs.195740 // AATF // 26574 // apoptosis antagonizing transcription factor	0.309598	0.284792	-0.209213	-0.525922	0.143845	0.155189	-0.0547565	-0.080015	-0.0958483	-0.213579	0.012688	-0.525197	-0.387607	0.108446	-0.39952	-0.18772	0.064506	-0.381875	-0.450737	-0.1258	-0.0418781	-0.228124	0.0277495	0.155513	-0.354937	-0.0849157	0.0607411	-0.0505893	-0.510802	0.0975744	-0.0526848	-0.210381	-0.462349	-0.0739796	0.159244	-0.221212	0.0568758	0.0920738	0.229661	-0.0249623	-0.443715
AATK	17	q25.3	ENST00000326724 // Hs.514575 // AATK // 9625 // apoptosis-associated tyrosine kinase	0.230969	0.229752	0.138157	0.106466	0.139185	0.394882	0.283852	0.354904	0.335825	0.0658574	0.113887	0.330796	-0.0624573	0.171149	0.293131	0.153105	-0.0979642	0.34155	0.171366	-0.0298118	-0.0736228	0.321338	0.0944027	0.178056	0.343514	0.333929	0.212622	-0.0554254	0.388264	-0.236783	-0.0225323	0.173937	0.174315	0.027781	0.218348	0.151864	0.141699	-0.119252	0.233085	-0.0211247	0.365014
ABAT	16	p13.2	ENST00000268251 // Hs.336768 // ABAT // 18 // 4-aminobutyrate aminotransferase	0.00435291	0.0253539	-0.16903	0.105151	0.0239186	-0.0452348	0.207318	0.158559	-0.0982112	-0.00448963	0.0384479	0.0566806	-0.0888433	0.0643568	-0.324458	-0.222277	0.0217741	-0.315439	0.0816355	0.0520327	-0.0382899	0.208718	0.00480488	0.114447	-0.275024	-0.128297	0.032257	-0.0928855	0.0692087	0.0509374	-0.0934434	-0.159981	0.0726273	-0.212005	0.0990256	-0.188073	0.00326423	-0.0105056	0.055402	-0.0939919	0.0816009
ABCA1	9	q31.1	ENST00000374733 // Hs.659274 // ABCA1 // 19 // ATP-binding cassette, sub-family A (ABC1), member 1	-0.240376	-0.242772	0.34179	-0.370947	-0.30198	0.211839	0.22323	0.174481	-0.0509774	-0.194499	0.248865	0.181463	-0.103861	0.0479392	0.134589	-0.193265	0.231	0.101087	-0.332192	0.0162804	-0.142655	0.171926	0.232056	-0.190559	0.119283	-0.0461627	0.144188	-0.5169	0.181553	0.280832	-0.473145	0.332344	-0.328743	-0.217951	0.0694028	0.26033	0.165596	0.244445	-0.296287	-0.432545	0.0605185
ABCA10	17	q24.3	ENST00000269081 // Hs.25377 // ABCA10 // 10349 // ATP-binding cassette, sub-family A (ABC1), member 10	0.257197	0.235049	0.0542086	0.11807	0.120515	0.318459	0.137596	0.163261	0.131874	-0.230353	-0.0349075	1.1083	-0.115762	0.0846822	-0.376567	-0.0777064	0.0707232	-0.378819	0.107695	-0.00815313	-0.0893979	0.170693	-0.00257754	0.11971	-0.388941	0.152409	0.1377	-0.0883706	1.05567	0.0539933	-0.0759232	0.0854921	0.111753	-0.0956891	0.0477028	0.0735302	0.024495	0.109779	0.250012	-0.0514483	0.944301
ABCA11P	4	p16.3	ENST00000451020 // Hs.428360 // ABCA11P // 79963 // ATP-binding cassette, sub-family A (ABC1), member 11, pseudogene	0.466199	0.546599	-0.238286	0.037142	0.425056	0.171327	0.14578	-0.179934	-0.0456527	-0.648044	-0.284708	0.0587038	0.929907	0.479138	-0.384498	-0.690944	0.0406538	-0.375183	0.0358001	-0.0159234	-0.0310689	-0.135781	-0.297442	0.353843	-0.332681	-0.0720062	0.35499	-0.0902328	0.116935	-0.0111525	-0.0710532	-0.0842703	0.0237004	-0.184004	0.425066	-0.133396	-0.352222	0.0902532	0.368674	-0.0648868	0.0797676
ABCA12	2	q35	ENST00000272895 // Hs.134585 // ABCA12 // 26154 // ATP-binding cassette, sub-family A (ABC1), member 12	0.0423077	0.0492138	0.0557844	-0.400792	0.00901113	0.191686	0.20863	-0.60715	-0.11054	0.245755	-0.325311	-0.00194651	0.0992805	0.0453727	-0.421638	0.0405235	-0.232782	-0.453418	-0.385463	-0.0959946	-0.0365738	-0.492778	-0.28855	-0.381314	-0.409212	-0.118714	0.0418623	-0.0448769	-0.00929888	-0.285965	-0.0409419	0.106697	-0.349798	0.260517	0.0239356	0.0134111	-0.329876	-0.247248	-0.0477704	-0.03589	0.00310519
ABCA13	7	p12.3	ENST00000411975 // Hs.226568 // ABCA13 // 154664 // ATP-binding cassette, sub-family A (ABC1), member 13	-0.236617	-0.219527	-0.198928	-0.408748	-0.275657	0.235548	0.222662	0.0633531	-0.0346978	0.321121	0.0180826	0.0281137	0.191195	0.121727	-0.0542412	0.340986	0.0851237	-0.0545564	-0.376383	0.0313322	-0.0203003	0.201652	-0.0214185	0.177776	-0.0325489	-0.0250036	0.0978169	-0.00281326	0.0243126	0.0905633	-0.0149277	-0.180673	-0.367363	0.0474834	0.0954974	-0.136731	-0.0335411	0.106357	-0.201622	-0.0101849	0.034018
ABCA17P	16	p13.3	ENST00000469908 // Hs.376281 // ABCA17P // 650655 // ATP-binding cassette, sub-family A (ABC1), member 17, pseudogene	-0.0512449	-0.0136895	-0.248235	0.346841	-0.0520138	-0.440127	-0.375199	-0.261044	-0.129697	0.00385365	0.0147698	0.0211936	-0.17346	0.111981	-0.32404	-0.267595	-0.0168727	-0.288748	0.351849	-0.106466	0.151078	-0.279988	0.0113798	0.108173	-0.297313	-0.116026	-0.303724	0.477906	0.0111646	-0.0244673	0.408487	-0.233959	0.342624	-0.215882	0.113804	-0.265312	0.00947404	-0.0331878	-0.0157234	0.407094	0.0453781
ABCA2	9	q34.3	ENST00000265662 // Hs.421202 // ABCA2 // 20 // ATP-binding cassette, sub-family A (ABC1), member 2	-0.232528	-0.312039	0.298329	-0.363218	-0.369514	0.169281	0.191132	0.512605	0.00719058	-0.133057	0.495981	0.347278	0.117655	0.413085	0.242781	-0.109709	0.288959	0.372869	-0.357107	0.099109	0.0346519	0.494557	0.317948	0.481985	0.249781	-0.0357882	0.139639	0.0201132	0.387223	0.265191	0.0999804	0.344835	-0.339118	-0.124179	0.40132	0.207361	0.244341	0.261811	-0.351323	0.0490037	0.341609
ABCA3	16	p13.3	ENST00000301732 // Hs.26630 // ABCA3 // 21 // ATP-binding cassette, sub-family A (ABC1), member 3	-0.00410394	-0.00199933	-0.235051	0.316352	0.00880761	-0.448232	-0.349799	-0.294428	-0.14608	0.0151498	-0.00189847	0.00347394	-0.121737	0.0478066	-0.38111	-0.271229	-0.0361779	-0.361065	0.313035	-0.110996	0.160506	-0.267263	0.0363091	0.102496	-0.354527	-0.0957592	-0.32371	0.423706	-0.000347972	-0.0547518	0.362067	-0.232066	0.336995	-0.232421	0.0809063	-0.232357	-0.0647951	-0.113917	-0.00621861	0.404546	0.0230468
ABCA4	1	p22.1	ENST00000370225 // Hs.416707 // ABCA4 // 24 // ATP-binding cassette, sub-family A (ABC1), member 4	-0.214043	-0.246262	-0.057346	-0.371212	0.0104929	-0.307849	-0.29502	0.0720635	-0.00974322	0.167664	0.0903758	0.0887233	-0.0106239	-0.359906	0.212294	0.165777	0.475552	0.206199	-0.332472	0.0555173	0.0110046	0.152728	0.0410906	-0.306356	0.206682	0.0238889	-0.138078	0.0599758	0.0687129	0.549223	0.0344457	0.180541	-0.343193	-0.166205	-0.311823	0.163958	0.0802181	0.556903	0.0312173	0.00157668	0.0268714
ABCA5	17	q24.3	ENST00000392676 // Hs.731824 // ABCA5 // 23461 // ATP-binding cassette, sub-family A (ABC1), member 5	0.208856	0.187762	0.0389128	0.0399617	0.0280337	0.317958	0.179542	0.186749	0.141345	-0.242966	-0.0130917	1.17715	-0.207632	-0.00652513	-0.409273	-0.136985	0.0394327	-0.420168	0.0408887	0.00140637	-0.0546015	0.174824	0.0319494	0.0671005	-0.366704	0.180957	0.173735	-0.0621667	1.05305	0.0700234	-0.0833894	0.0247183	0.0799844	-0.0965597	0.00863601	0.0108627	0.0600622	0.0539597	0.143571	-0.0413462	0.991291
ABCA6	17	q24.2	ENST00000284425 // Hs.709514 // ABCA6 // 23460 // ATP-binding cassette, sub-family A (ABC1), member 6	0.23843	0.221633	0.0498791	0.0781909	0.0737493	0.359516	0.118247	0.207463	-0.131244	-0.2439	-0.02657	1.17798	-0.16708	0.0483964	-0.395485	-0.117973	0.0720174	-0.363515	0.0862657	-0.0488187	-0.0215963	0.16166	-0.0271278	0.148471	-0.374761	-0.119343	0.176853	-0.0877865	1.06994	0.0765878	-0.121067	0.0489809	0.110335	-0.0778346	0.0523296	0.0561298	0.0284543	0.0973953	0.143857	-0.0740067	1.00705
ABCA8	17	q24.2	ENST00000269080 // Hs.58351 // ABCA8 // 10351 // ATP-binding cassette, sub-family A (ABC1), member 8	0.270356	0.255946	0.0399388	0.0960369	0.106928	0.339771	0.18594	0.134382	-0.0751072	-0.165225	-0.0262388	1.1642	-0.103555	0.0690498	-0.465092	-0.048613	0.0416123	-0.453351	0.11107	-0.00493727	-0.0762855	0.139384	-0.0121168	0.145743	-0.436708	-0.0628988	0.209273	-0.0919154	1.07702	0.0656042	-0.0650016	0.0348272	0.129508	-0.0601098	0.0705989	0.0508415	0.021389	0.0800493	0.200308	-0.0476026	1.02366
ABCA9	17	q24.2	ENST00000340001 // Hs.131686 // ABCA9 // 10350 // ATP-binding cassette, sub-family A (ABC1), member 9	0.278337	0.255234	0.0413307	0.0979605	0.100466	0.414646	0.24143	0.205851	-0.093135	-0.228991	0.0269346	1.17804	-0.105486	0.0547047	-0.428268	-0.10721	0.0646653	-0.408338	0.093915	-0.0200861	-0.0115131	0.19257	0.0562025	0.130294	-0.436555	-0.0928297	0.258414	-0.0590042	1.0793	0.0938323	-0.101184	0.0494267	0.142836	-0.0898406	0.0613691	0.0953334	0.0900964	0.0402473	0.199756	-0.0311959	1.03168
ABCB1	7	q21.12	ENST00000265724 // Hs.489033 // ABCB1 // 5243 // ATP-binding cassette, sub-family B (MDR/TAP), member 1	-0.353314	-0.763219	0.287529	-0.428617	-0.333577	0.171541	0.160038	0.0750151	-0.0916108	0.236591	-0.00825305	-0.0442774	0.0978732	0.0685876	-0.364645	0.256991	0.217177	-0.389475	-0.364179	-0.024926	-0.0512213	0.167012	-0.0319831	0.117192	-0.356926	-0.083425	0.0886856	-0.0828594	-0.0593086	0.218175	-0.0749953	0.328879	-0.356715	0.0384482	0.0753074	0.317628	-0.0583639	0.164174	-0.241047	-0.0530597	-0.0202362
ABCB10	1	q42.13	ENST00000344517 // Hs.17614 // ABCB10 // 23456 // ATP-binding cassette, sub-family B (MDR/TAP), member 10	0.396785	0.373405	0.0739936	-0.360081	0.388175	-0.016368	-0.00509279	-0.247243	0.0147499	-0.14104	0.0517334	0.056471	0.170459	-0.336725	-0.311622	-0.187809	0.0867752	-0.30438	-0.322474	0.00628267	0.0207517	-0.270227	0.226815	-0.320955	-0.247225	-0.00646379	-0.0357961	0.0174998	0.0553053	0.029661	0.0499602	0.343177	-0.337708	0.0142513	-0.309192	0.286116	0.133273	0.0661333	0.421802	-0.00349038	0.00431113
ABCB11	2	q31.1	ENST00000263817 // Hs.658439 // ABCB11 // 8647 // ATP-binding cassette, sub-family B (MDR/TAP), member 11	0.421332	0.381735	0.0111613	0.0861797	0.340805	-0.0133545	-0.028895	0.0361559	0.243923	0.252858	-0.28422	0.00816755	0.0928598	0.331985	0.13716	0.262441	0.0285404	0.117861	0.0924378	-0.011784	-0.00822991	0.0899397	-0.258402	0.147323	0.137159	0.240651	-0.0892596	0.0226852	-0.0112183	0.0448826	0.0196035	0.0766374	0.0825255	0.270658	0.338492	-0.0304048	-0.276321	0.072168	0.357827	0.018356	-0.0250814
ABCB4	7	q21.12	ENST00000417608 // Hs.654403 // ABCB4 // 5244 // ATP-binding cassette, sub-family B (MDR/TAP), member 4	-0.331805	-0.767015	0.236109	-0.46012	-0.320292	0.119067	0.148675	0.0174978	-0.112761	0.231439	-0.0511318	-0.0612465	0.0557638	0.0652192	-0.422455	0.255303	0.209995	-0.442247	-0.381627	-0.0382761	-0.0621015	0.109008	-0.0681594	0.0847257	-0.431713	-0.0986102	0.0755088	-0.0467962	-0.0418042	0.197706	-0.0661369	0.314225	-0.42206	0.03549	0.0136711	0.296109	-0.0517142	0.149817	-0.242418	-0.0667896	-0.0498951
ABCB5	7	p21.1	ENST00000404938 // Hs.404102 // ABCB5 // 340273 // ATP-binding cassette, sub-family B (MDR/TAP), member 5	-0.225427	0.0696959	-0.243954	0.141303	-0.259489	0.380652	0.195207	-0.256082	-0.0778673	0.0783678	-0.0308609	-0.0257218	0.107397	-0.465608	0.128636	0.0631055	0.0486277	0.131164	0.135453	0.00273778	0.153918	-0.0381471	-0.0255648	-0.403577	0.124761	-0.0695194	0.091684	0.420982	-0.0253885	0.0473154	0.420714	-0.228293	0.11943	0.0364279	-0.432641	-0.257906	-0.053128	0.0405565	-0.197847	0.39642	-0.00413392
ABCB6	2	q35	ENST00000265316 // Hs.107911 // ABCB6 // 10058 // ATP-binding cassette, sub-family B (MDR/TAP), member 6	-0.0752667	-0.0675355	0.186408	-0.434928	-0.0844018	0.0491687	0.197127	-0.547577	0.203598	0.0906938	-0.10837	-0.4443	0.110188	0.102939	-0.2286	-0.351252	-0.168074	-0.23268	-0.354926	-0.104308	-0.0799822	-0.40224	-0.21779	-0.368892	-0.38458	0.206745	-0.00471117	-0.0323512	-0.475486	-0.276051	0.00249233	0.0568485	-0.409939	0.300605	0.090898	-0.0367915	-0.326203	-0.123412	-0.139571	0.0112933	-0.355393
ABCB7	X	q13.3	ENST00000253577 // Hs.370480 // ABCB7 // 22 // ATP-binding cassette, sub-family B (MDR/TAP), member 7	-0.216436	-0.18354	-0.481388	0.177577	-0.259537	0.415657	0.415308	0.0119221	-0.0405665	-0.111458	0.272353	-0.250056	0.109297	-0.420025	0.119691	-0.154428	0.265545	0.140992	0.138359	-0.00150879	-0.145323	0.129222	0.198885	-0.363572	0.0942916	-0.0416471	0.288867	-0.5855	-0.122737	0.212794	-0.523334	-0.107723	0.108715	-0.564142	-0.331717	-0.161154	0.205626	0.272943	-0.205782	-0.480035	0.0912895
ABCB8	7	q36.1	ENST00000461373 // Hs.647118 // ABCB8 // 11194 // ATP-binding cassette, sub-family B (MDR/TAP), member 8	-0.356628	-0.639892	0.279548	0.0749357	-0.356131	0.278143	0.317545	0.0844027	-0.0457137	0.168402	-0.00772352	0.0304787	0.156254	-0.24834	0.548877	0.104062	0.145468	0.523103	0.0668565	0.0225481	-0.0630114	0.203225	-0.0452	-0.193111	0.555042	-0.0472457	0.150473	-0.0248613	0.0957952	0.0786855	0.00764626	0.195005	0.0619068	0.0635706	-0.309252	0.198985	0.0237639	0.199966	-0.250793	-0.0553367	0.0645725
ABCB9	12	q24.31	ENST00000280560 // Hs.511951 // ABCB9 // 23457 // ATP-binding cassette, sub-family B (MDR/TAP), member 9	0.0634489	0.0524923	-0.155964	-0.427247	-0.00151174	0.364938	0.358149	0.160234	0.209736	0.137516	0.0185576	0.0406522	0.00593829	0.0335846	-0.218643	0.0204266	-0.134058	-0.282122	-0.400003	0.029172	0.0710648	0.13815	0.0869229	0.10626	-0.207458	0.216662	0.234991	-0.0349714	0.0640592	-0.294147	0.0487726	-0.0463791	-0.358779	-0.0936703	0.0894163	-0.115614	0.122788	-0.238226	-0.0201335	-0.0163415	0.0586902
ABCC1	16	p13.11	ENST00000345148 // Hs.391464 // ABCC1 // 4363 // ATP-binding cassette, sub-family C (CFTR/MRP), member 1	0.0269788	0.0692986	-0.219523	0.11586	0.0576674	-0.0465604	0.207092	0.213766	-0.0980871	0.0243139	0.0224509	0.0443548	-0.0389365	0.0871331	-0.317714	-0.241615	0.132315	-0.300743	0.117104	0.0534261	-0.0331211	0.260462	0.0201083	0.125672	-0.293688	-0.103763	0.0220233	-0.11749	0.0535845	0.162575	-0.110318	-0.145366	0.117632	-0.197494	0.129821	-0.172703	0.0103501	0.0940545	0.0733509	-0.0892824	0.0700203
ABCC10	6	p21.1	ENST00000372515 // Hs.55879 // ABCC10 // 89845 // ATP-binding cassette, sub-family C (CFTR/MRP), member 10	0.12099	0.0998979	0.189717	0.0828054	0.135741	0.0252076	0.01926	0.106677	-0.000333286	0.12223	-0.356743	0.0306743	-0.127504	0.060646	-0.391711	0.125025	0.0449506	-0.287779	0.0765931	-0.0935131	-0.006179	-0.016721	-0.287957	0.152397	-0.349716	0.0791951	-0.047268	-0.0770817	-0.0171569	0.040705	-0.0531391	0.329519	0.0756526	0.317006	0.122665	0.393705	-0.319397	0.0579459	0.0536164	-0.102423	0.013921
ABCC11	16	q12.1	ENST00000353782 // Hs.652267 // ABCC11 // 85320 // ATP-binding cassette, sub-family C (CFTR/MRP), member 11	-0.267485	-0.277831	0.242972	0.0530342	-0.344919	-0.0669853	-0.036381	-0.315477	-0.0890938	-0.248815	-0.804731	0.0366631	-0.383368	0.0797186	0.117585	-0.211863	-0.148982	0.134543	0.0653808	-0.111401	0.00290122	-0.345726	-0.748283	0.124524	0.137774	-0.0939854	-0.137609	-0.0261926	0.0201089	-0.278442	-0.0130531	0.327624	0.0287842	-0.244406	0.103412	0.255866	-0.864436	-0.25104	-0.304813	-0.00825506	0.00981316
ABCC12	16	q12.1	ENST00000311303 // Hs.410111 // ABCC12 // 94160 // ATP-binding cassette, sub-family C (CFTR/MRP), member 12	-0.254594	-0.237947	0.259541	0.108106	-0.310111	-0.0485046	-0.0512766	-0.324386	-0.0704662	-0.19285	-0.781719	0.0561878	-0.454158	0.0939147	0.112557	-0.175595	-0.141458	0.127175	0.132414	-0.0922729	0.000613984	-0.326225	-0.737149	0.165538	0.138019	-0.0544144	-0.0678716	0.028912	0.0461976	-0.235035	0.0065742	0.380538	0.0901405	-0.240444	0.0968551	0.291604	-0.817006	-0.194326	-0.28217	-0.0261659	0.0207314
ABCC13	21	q11.2	ENST00000429114 // Hs.366575 // ABCC13 // 150000 // ATP-binding cassette, sub-family C (CFTR/MRP), member 13, pseudogene	0.0286115	0.044428	0.0850697	0.411691	-0.00398892	-0.0824278	-0.0586451	0.174105	0.0947604	0.502026	-0.31295	-0.281134	0.108993	0.0723017	0.065359	0.548814	-0.229308	0.0584122	0.40215	-0.0363187	-0.0469389	0.18953	-0.0410485	0.133731	0.094421	0.128163	-0.0910504	-0.00299255	-0.247331	-0.253137	-0.0238535	0.0881851	0.363532	0.0419392	0.0412536	0.00310539	-0.0629787	-0.211001	0.0226701	0.0142592	0.0665693
ABCC2	10	q24.2	ENST00000370434 // Hs.368243 // ABCC2 // 1244 // ATP-binding cassette, sub-family C (CFTR/MRP), member 2	0.0395404	0.0296683	-0.135327	-0.44129	0.0721389	-0.301195	-0.269881	-0.257691	-0.0476082	0.117673	-0.217663	-0.148323	0.160457	0.10504	-0.333732	0.110824	-0.16521	0.135932	-0.382185	-0.0503296	-0.0481627	-0.281215	-0.0157422	0.189116	-0.273996	-0.0539317	-0.24551	0.00719611	-0.157699	-0.222532	-0.00395416	-0.0892793	-0.386073	0.0720709	0.149539	-0.105348	-0.0614961	-0.240028	-0.0419248	-0.0126098	-0.0925772
ABCC3	17	q21.33	ENST00000285238 // Hs.463421 // ABCC3 // 8714 // ATP-binding cassette, sub-family C (CFTR/MRP), member 3	0.0922468	0.0413792	0.307742	-0.495268	0.00977095	0.108569	-0.0390888	0.160602	0.237218	-0.127591	0.0540932	0.0714613	-0.0816555	0.117255	-0.251549	-0.0377107	0.228295	-0.237414	-0.399258	0.0433689	-0.0296952	0.132719	0.0941325	0.144688	-0.162865	0.229233	0.0969398	-0.0344563	0.119188	0.288347	-0.00913234	0.353425	-0.349452	-0.0391996	0.0627221	0.327438	0.178629	0.310901	0.131268	-0.01626	0.0898583
ABCC4	13	q32.1	ENST00000376887 // Hs.508423 // ABCC4 // 10257 // ATP-binding cassette, sub-family C (CFTR/MRP), member 4	0.0165287	-0.21614	-0.653913	-0.41412	0.0113017	-0.310946	-0.291452	-0.22338	0.274618	-0.144286	-0.29015	0.0177658	0.138241	0.0123594	0.131888	0.0807804	-0.0153158	0.104032	-0.375713	-0.0325659	0.179975	-0.226739	-0.288304	0.0893105	0.127871	0.286953	-0.230268	0.479741	0.024125	-0.271463	0.446896	-0.632509	-0.360306	0.0657914	0.0814255	-0.678115	-0.316987	-0.246363	0.00853862	0.41511	0.0311061
ABCC5	3	q27.1	ENST00000265586 // Hs.728765 // ABCC5 // 10057 // ATP-binding cassette, sub-family C (CFTR/MRP), member 5	0.418385	0.264735	0.858837	0.352465	0.290344	0.527091	0.509977	0.667765	0.568773	0.597326	0.342345	0.786618	0.445278	0.67413	0.520723	0.592543	0.263784	0.486282	0.345918	0.226292	0.161256	0.768066	0.39901	0.701584	0.524126	0.529353	0.402908	0.508204	0.788247	0.316551	0.546043	0.80155	0.405059	0.477251	0.680983	0.880714	0.343226	0.262773	0.217642	0.492991	0.661881
ABCC6	16	p13.11	ENST00000205557 // Hs.442182 // ABCC6 // 368 // ATP-binding cassette, sub-family C (CFTR/MRP), member 6	0.0269855	0.0400002	-0.185933	0.1379	0.0493232	-0.0430074	0.193913	0.192602	-0.0556857	0.0412126	0.0653847	0.0643484	-0.0673742	0.112434	-0.240708	-0.193054	0.0617211	-0.253927	0.131249	0.0741484	-0.0192257	0.257796	0.0380057	0.166325	-0.195908	-0.0535332	0.0319524	-0.080569	0.0746721	0.0532854	-0.0725366	-0.12256	0.116091	-0.172125	0.101046	-0.175341	0.0237063	0.0360282	0.0725399	-0.0662025	0.0967901
ABCC8	11	p15.1	ENST00000302539 // Hs.54470 // ABCC8 // 6833 // ATP-binding cassette, sub-family C (CFTR/MRP), member 8	-0.00203741	-0.0300152	-0.257708	-0.545469	-0.0341806	-0.388066	-0.377679	-0.377858	-0.0349853	-0.155562	0.00635098	-0.222438	0.0630993	-0.426396	-0.340531	-0.151778	0.0575195	-0.289009	-0.4529	-0.132054	-0.0512894	-0.402633	-0.043432	-0.405265	-0.385768	-0.0219279	-0.284545	-0.0241292	-0.202567	0.0608311	-0.0142558	-0.193122	-0.495959	0.0342238	-0.379004	-0.192422	-0.0335031	0.0866741	0.0173184	-0.0684055	-0.197649
ABCC9	12	p12.1	ENST00000261200 // UTR-3 // 0 // Hs.732701 // ABCC9 // 10060 // ATP-binding cassette, sub-family C (CFTR/MRP), member 9	-0.0076446	0.0257716	0.296251	-0.404403	0.0402571	0.149314	0.161174	-0.340104	-0.0753955	0.353967	0.388843	-0.0166133	-0.328057	0.0695681	-0.377244	0.363272	0.390969	-0.421621	-0.339383	-0.0516627	-0.0592957	-0.405027	0.363821	0.148742	-0.36494	-0.0994078	0.0477594	-0.0499923	-0.0142507	0.45307	-0.0257736	0.359492	-0.320202	-0.204312	0.0302445	0.332043	0.299608	0.472465	0.0479476	-0.0177593	-0.0225701
ABCD1	X	q28	ENST00000218104 // Hs.159546 // ABCD1 // 215 // ATP-binding cassette, sub-family D (ALD), member 1	-0.123919	-0.118977	-0.318079	-0.384494	-0.268369	-0.256622	-0.176441	0.0113342	-0.524709	0.260429	0.374803	0.388002	0.208568	0.127566	0.599144	0.237289	0.269168	0.61716	-0.324269	0.095694	0.325227	0.22088	0.380571	-0.255623	0.668988	-0.455688	-0.142511	0.873762	0.377466	0.214195	0.753767	-0.0751796	-0.356734	-0.610332	0.208535	-0.147551	0.387048	0.298569	-0.251187	0.72697	0.381952
ABCD2	12	q12	ENST00000308666 // Hs.117852 // ABCD2 // 225 // ATP-binding cassette, sub-family D (ALD), member 2	-0.046134	-0.0125124	-0.250788	-0.431013	-0.0238761	-0.104969	-0.088267	0.0341678	-0.150116	0.0441363	0.173101	-0.0809765	0.208747	0.00111876	-0.379779	0.0113698	-0.208249	-0.393916	-0.378195	-0.034853	-0.100556	-0.0902734	0.219721	0.0850945	-0.393012	-0.150341	-0.110266	-0.189521	-0.068207	-0.310623	-0.124503	-0.203192	-0.371845	-0.225379	0.00877701	-0.247332	0.185507	-0.28562	0.0040136	-0.105115	-0.0520147
ABCD3	1	p21.3	ENST00000315713 // Hs.700576 // ABCD3 // 5825 // ATP-binding cassette, sub-family D (ALD), member 3	-0.274891	-0.265033	-0.105496	-0.384887	-0.0263489	-0.289312	-0.325847	0.0446749	0.0253899	0.124786	0.0153701	0.0619523	-0.0965325	-0.495961	0.129297	0.147492	0.053445	0.107338	-0.303115	0.041593	-0.0354088	0.117867	-0.000600684	-0.423628	0.147528	0.0178122	-0.136522	-0.019969	0.046335	0.0808554	-0.0223358	0.143281	-0.325206	-0.127076	-0.413796	0.124944	-0.00563093	0.0891145	0.0327237	-0.0145439	0.0234795
ABCD4	14	q24.3	ENST00000298816 // Hs.94395 // ABCD4 // 5826 // ATP-binding cassette, sub-family D (ALD), member 4	0.0777489	0.149218	0.551102	0.362431	-0.0309746	-0.0855453	-0.0128954	-0.124712	0.366026	0.0998201	0.0526199	0.0224786	0.131938	0.0569222	-0.282376	-0.0400469	0.22104	-0.323981	0.372096	0.100997	0.030798	-0.0845174	0.0680851	-0.042495	-0.247532	0.388992	0.0182327	-0.0841097	0.0722922	0.266612	-0.0512525	0.742974	0.394637	0.0594221	0.036304	0.632578	0.0843207	0.208855	-0.0675382	0.0234076	0.0403338
ABCE1	4	q31.21	ENST00000296577 // Hs.12013 // ABCE1 // 6059 // ATP-binding cassette, sub-family E (OABP), member 1	0.0404506	0.00405304	0.0291456	0.139706	0.00254096	-0.358743	-0.277117	-0.389102	-0.170173	-0.670212	0.0270004	-0.0154292	-0.036914	-0.506436	0.109029	-0.585828	-0.172937	0.171438	0.101494	-0.158743	-0.105575	-0.392119	-0.0539022	-0.445564	0.119337	-0.075019	-0.323476	-0.0622537	-0.0149997	-0.27606	-0.0937008	0.076086	0.114387	-0.183192	-0.512821	0.0662227	0.0393697	-0.226514	0.0231504	-0.0683579	-0.0669546
ABCF1	6	p21.33	ENST00000326195 // Hs.655285 // ABCF1 // 23 // ATP-binding cassette, sub-family F (GCN20), member 1	-0.287321	-0.249248	-0.166946	0.0304897	-0.103801	-0.126543	-0.13568	-0.10427	0.34911	0.0284965	-0.346596	-0.0466475	-0.137074	0.00867992	-0.36744	0.100566	0.0510777	-0.418045	-0.0889963	-0.117416	0.0890904	-0.124567	-0.307238	0.0500772	-0.383066	0.392423	-0.194176	0.236642	-0.07799	0.0305382	0.235441	-0.365399	0.05971	0.377203	0.0710502	-0.262163	-0.40314	-0.0860976	-0.118503	0.214366	0.0529242
ABCF2	7	q36.1	ENST00000222388 // Hs.654958 // ABCF2 // 10061 // ATP-binding cassette, sub-family F (GCN20), member 2	-0.255983	-0.681105	0.276435	0.146102	-0.339912	0.352803	0.418728	0.142373	-0.0198956	0.160357	0.1697	0.106923	0.255276	-0.136908	0.622814	0.154824	0.200477	0.632342	0.122926	0.0963897	0.0691671	0.377187	0.068345	-0.0828576	0.59813	0.015916	0.193379	0.113618	0.115304	0.190227	0.0160448	0.202326	0.0973256	0.182347	-0.21966	0.191453	0.169532	0.267011	-0.262336	0.00770109	0.0988452
ABCF3	3	q27.1	ENST00000292808 // Hs.361323 // ABCF3 // 55324 // ATP-binding cassette, sub-family F (GCN20), member 3	0.444686	0.258233	0.898871	0.434843	0.344952	0.636554	0.702777	0.687361	0.654014	0.673932	0.357301	0.551241	0.601337	0.588139	0.661335	0.53402	0.2353	0.655668	0.455294	0.286716	0.202	0.781142	0.502039	0.680956	0.733782	0.649258	0.524387	0.590468	0.681773	0.333096	0.626772	0.912693	0.439027	0.584724	0.699014	0.778844	0.447373	0.361864	0.291052	0.563079	0.586274
ABCG1	21	q22.3	ENST00000398457 // Hs.124649 // ABCG1 // 9619 // ATP-binding cassette, sub-family G (WHITE), member 1	0.0186291	0.0175188	0.288149	0.0880547	-0.0711742	-0.144955	-0.0846664	0.166088	-0.0545835	-0.202661	-0.282261	-0.171923	0.272952	-0.410879	0.199786	-0.220559	-0.187965	0.132177	0.0753728	0.00043675	-0.0136182	0.224985	-0.000194	-0.420362	0.240145	-0.0583845	-0.167464	0.00850475	-0.164708	-0.209814	-0.0470274	0.332083	0.0508458	-0.0559422	-0.389448	0.316658	-0.0191423	-0.17837	-0.0836985	-0.0489141	-0.248346
ABCG2	4	q22.1	ENST00000515655 // Hs.480218 // ABCG2 // 9429 // ATP-binding cassette, sub-family G (WHITE), member 2	-0.269618	-0.205127	-0.243903	-0.412992	-0.275613	-0.373917	-0.363781	0.138734	-0.136488	-0.613512	-0.351594	-0.0123666	-0.0963978	0.0149933	0.10132	-0.72249	-0.232846	0.0826758	-0.365086	-0.00954153	-0.0781702	0.126543	-0.316706	0.122687	0.0745962	-0.136019	-0.273138	-0.172084	-0.0273377	-0.318783	-0.0950822	-0.224903	-0.346833	-0.223737	0.048269	-0.22226	-0.321591	-0.33786	-0.235616	-0.109165	-0.0623561
ABCG4	11	q23.3	ENST00000307417 // UTR-3 // 0 // Hs.126378 // ABCG4 // 64137 // ATP-binding cassette, sub-family G (WHITE), member 4	-0.300204	-0.250841	-0.0496688	0.103549	-0.0250017	0.0540551	-0.0386963	-0.322242	0.021831	0.190811	0.0193644	-0.169608	-0.0405262	0.233899	0.583968	0.0550431	0.0220677	0.166969	-0.00295625	-0.109093	-0.0782296	-0.373228	0.0722654	0.134043	0.343923	-0.0355181	-0.0320191	-0.0893485	-0.1775	0.0342978	-0.101832	-0.168713	0.0484586	0.0583335	0.160666	-0.164265	0.013285	0.0144613	-0.0718825	-0.062058	-0.0764037
ABCG5	2	p21	ENST00000260645 // Hs.132992 // ABCG5 // 64240 // ATP-binding cassette, sub-family G (WHITE), member 5	0.28763	0.260752	-0.116619	0.0515379	0.0332579	0.0170313	0.0130114	-0.166477	-0.144084	0.291969	0.236079	0.0127203	0.100128	0.103735	0.109491	0.277248	0.0950012	0.13828	0.0745932	0.0808257	-0.0259667	-0.203545	0.206097	0.162626	0.11023	-0.0804089	-0.0727118	-0.0924613	-0.00719083	0.0336269	-0.121554	0.121243	0.104662	-0.0342275	0.0812569	0.106347	0.269823	0.0276002	0.111393	-0.0867984	0.0233861
ABCG8	2	p21	ENST00000272286 // Hs.413931 // ABCG8 // 64241 // ATP-binding cassette, sub-family G (WHITE), member 8	0.262415	0.220387	-0.0850904	0.141421	0.0436606	-0.0692558	-0.0890167	-0.134355	-0.0692094	0.311126	0.30082	0.0346624	0.101128	-0.0151294	0.178961	0.346994	0.124828	0.189755	0.130404	0.071023	-0.0244781	-0.225192	0.247272	0.148938	0.153615	-0.0613812	-0.111754	-0.0594845	0.0252844	0.0931346	-0.029097	0.15848	0.146516	0.0847159	0.00444222	0.153757	0.319846	0.0469611	0.130941	-0.0274268	0.0471626
ABHD1	2	p23.3	ENST00000316470 // Hs.375791 // ABHD1 // 84696 // abhydrolase domain containing 1	0.019594	0.0950415	-0.0355587	-0.134603	-0.249341	-0.178405	-0.0415772	-0.0173168	-0.0151237	0.0880117	0.312437	0.0255137	-0.0498908	-0.0284987	0.179658	0.0733743	-0.0102115	0.179376	0.124505	-0.0866928	-0.07919	-0.031653	0.295323	-0.507288	0.210926	-0.075123	-0.106153	-0.14581	0.0158605	0.00592983	-0.0720292	0.230341	-0.00371233	0.0330667	-0.155221	0.163964	0.355818	0.0603563	-0.264481	-0.0665755	0.0202167
ABHD10	3	q13.2	ENST00000273359 // Hs.477115 // ABHD10 // 55347 // abhydrolase domain containing 10	0.158728	0.0833463	0.297748	0.145391	-0.153562	0.306571	0.493228	0.274806	0.628145	0.357004	0.268818	0.369649	0.545738	0.0565663	0.153282	0.378144	0.283694	0.128509	0.0876523	0.148938	0.250585	0.424335	0.376925	0.184236	0.170917	0.635969	0.291954	0.618383	0.441053	0.389796	0.564597	0.376682	0.0531487	0.184099	0.0900465	0.32071	0.358486	0.361604	-0.157639	0.477861	0.213792
ABHD11	7	q11.23	ENST00000222800 // Hs.647045 // ABHD11 // 83451 // abhydrolase domain containing 11	-0.360741	-0.774726	0.434175	-0.477787	-0.380346	0.273751	0.090253	0.0648035	-0.133313	0.401523	0.0591305	0.112051	0.161187	0.793009	0.283417	0.342423	0.288013	0.334806	-0.515548	0.017773	-0.069706	0.157371	0.100722	0.810813	0.278895	-0.26093	-0.012077	-0.105171	0.102768	0.114936	-0.06971	0.286293	-0.347513	0.169596	0.746672	0.299082	0.0769045	-0.051627	-0.305253	-0.155753	0.092512
ABHD12	20	p11.21	ENST00000339157 // Hs.441550 // ABHD12 // 26090 // abhydrolase domain containing 12	0.475556	0.422754	0.0114187	0.000645385	0.302543	-0.313064	-0.00269852	0.237257	0.461961	0.186417	0.3337	0.0486776	0.10371	-0.363601	0.172238	0.150535	0.0862134	0.137047	0.0887991	0.0462113	0.13015	0.241262	0.276711	-0.418976	0.159913	0.482873	0.0503644	0.532067	0.0562042	0.0848418	0.327793	0.374161	0.103569	0.481527	-0.358432	0.0766534	0.208105	0.0817327	0.456946	0.33512	0.0443604
ABHD12B	14	q22.1	ENST00000337334 // Hs.271896 // ABHD12B // 145447 // abhydrolase domain containing 12B	0.0965484	0.0968792	0.214687	-0.36133	0.0127083	-0.0206505	-0.0194363	-0.0147488	0.412935	0.344538	-0.0647538	-0.0414902	0.183803	0.0695637	0.173081	0.341171	0.0460697	0.0913919	-0.356304	0.0292538	-0.139036	-0.0796018	-0.0951751	0.145711	0.167747	0.436021	0.001942	-0.618436	0.0248993	0.0985315	-0.562724	0.33688	-0.31496	0.0782224	0.0413076	0.248209	-0.0824304	0.0562695	0.0412395	-0.466676	-0.00976654
ABHD13	13	q33.3	ENST00000375898 // Hs.183528 // ABHD13 // 84945 // abhydrolase domain containing 13	-0.232178	-0.232227	-0.652987	-0.429971	-0.343386	-0.335266	-0.311922	-0.176466	0.305341	-0.120699	-0.302827	-0.00902606	-0.331862	-0.0335914	-0.414044	0.0709214	0.316324	-0.477495	-0.361222	-0.0615694	0.20519	-0.26436	-0.267803	0.0763329	-0.412475	0.290044	-0.250955	0.543474	-0.0323598	0.32133	0.47769	-0.692689	-0.391358	0.049776	-0.0260945	-0.784634	-0.268595	0.332273	-0.246784	0.455843	0.0424124
ABHD14A	3	p21.2	ENST00000273596 // Hs.534400 // ABHD14A // 25864 // abhydrolase domain containing 14A	0.0572649	-0.0250897	-0.184685	-0.429883	-0.0231511	-0.0845029	-0.0839511	0.109689	-0.119146	-0.228726	0.492286	0.128414	0.0944833	0.0444237	0.213913	-0.225641	-0.18053	0.247296	-0.470877	-0.0387558	-0.0542098	0.249966	0.573538	0.0980795	0.217777	-0.0313679	-0.108813	-0.0382933	0.187311	-0.184898	-0.0542487	-0.135337	-0.491788	-0.213038	0.0792422	-0.224881	0.413609	-0.18359	-0.0306753	-0.016313	0.214088
ABHD14B	3	p21.2	ENST00000315877 // UTR-3 // 0 // Hs.420796 // ABHD14B // 84836 // abhydrolase domain containing 14B	0.0392555	0.059567	-0.148613	-0.322748	0.0463368	-0.0152106	0.0745998	0.209659	-0.0815259	-0.0935696	0.566343	0.239951	0.26379	0.206862	0.329047	-0.0861632	-0.154504	0.363986	-0.325419	0.138916	-0.10986	0.346381	0.60202	0.207423	0.39904	-0.0193168	-0.0589951	0.00352725	0.328143	-0.175159	0.0891663	-0.0570652	-0.38293	-0.253927	0.196916	-0.0869945	0.397066	-0.138979	0.168155	-0.0603251	0.252775
ABHD15	17	q11.2	ENST00000307201 // Hs.106510 // ABHD15 // 116236 // abhydrolase domain containing 15	-0.261549	-0.142932	-0.0102425	-0.0798265	-0.085934	-0.220075	-0.324649	-0.096375	-0.014566	-0.041442	0.236393	-0.338214	0.1969	-0.22269	0.0533125	-0.017139	-0.0282975	-0.150732	-0.16987	-0.078357	-0.0361605	-0.0543625	-0.0386735	-0.226788	-0.171013	-0.0464815	-0.147682	0.116423	-0.135958	-0.034256	0.126662	0.0099	-0.163626	-0.0998785	-0.0812275	-0.0375315	0.111891	0.0880425	-0.134662	0.041286	-0.169545
ABHD16A	6	p21.33	ENST00000375842 // Hs.388188 // ABHD16A // 7920 // abhydrolase domain containing 16A	-0.339157	-0.251369	-0.236484	0.422114	-0.0395332	-0.127075	0.0189768	0.141546	0.433271	0.108646	-0.33701	0.0189495	-0.0300972	0.215347	-0.283019	0.157614	0.0520468	-0.339463	0.446617	0.0582898	-0.009647	0.0829625	-0.276572	0.107548	-0.286196	0.435106	-0.124935	0.27246	0.0860005	0.0112952	0.350749	-0.205416	0.450546	0.507717	0.200635	-0.193564	-0.354368	0.0170375	-0.138088	0.230622	0.141385
ABHD2	15	q26.1	ENST00000352732 // Hs.122337 // ABHD2 // 11057 // abhydrolase domain containing 2	0.0347478	-0.007869	-0.206465	0.583589	0.0169211	-0.40666	-0.355115	-0.110246	-0.0440113	-0.177917	-0.365247	0.0288035	-0.380287	0.0677573	0.158299	-0.23586	0.070887	0.121162	0.572048	-0.0361432	0.154212	0.0887552	-0.355733	0.12531	0.147104	-0.0405561	-0.277451	0.509688	0.0416034	0.102535	0.478765	-0.171705	0.541414	-0.0835241	0.0693148	-0.212062	-0.369682	0.0697245	0.0864878	0.448075	0.174814
ABHD3	18	q11.2	ENST00000289119 // Hs.397978 // ABHD3 // 171586 // abhydrolase domain containing 3	-0.226101	-0.265162	0.0707513	1.10512	-0.248278	-0.0659903	0.114958	0.148626	0.106786	-0.173746	-0.370072	-0.255337	-0.0750882	-0.537679	-0.215749	-0.24665	-0.0243926	-0.223502	1.03328	0.0132692	0.0267467	0.0951573	0.0954089	-0.400844	-0.195289	0.104358	-0.0373697	0.157027	-0.278424	-0.046185	0.194216	0.0945877	1.08627	0.140537	-0.401564	0.180334	-0.114059	-0.114824	-0.221819	0.190963	-0.235164
ABHD4	14	q11.2	ENST00000428304 // Hs.445665 // ABHD4 // 63874 // abhydrolase domain containing 4	-0.22998	-0.218668	-0.199488	0.134248	-0.289336	-0.00990908	-0.0252301	0.00925838	0.140126	0.311541	-0.0260666	-0.0237903	0.00492639	0.114247	0.104936	0.210814	-0.15707	0.0274465	0.073916	0.05225	-0.0380587	-0.00355546	0.0154331	0.157727	0.115025	0.131313	0.00440513	0.0146694	-0.00376128	-0.216319	0.0177002	-0.147987	0.125161	0.0407099	0.091722	-0.166004	0.000114205	-0.215706	-0.250969	0.0389714	0.0341023
ABHD5	3	p21.33	ENST00000413300 // Hs.19385 // ABHD5 // 51099 // abhydrolase domain containing 5	-0.226022	-0.224064	0.0606122	-0.412591	-0.237833	-0.022211	-0.0130699	0.153559	-0.0669634	-0.175041	0.0533413	0.196433	0.197696	0.106607	0.115927	-0.179552	-0.181439	0.126844	-0.378499	0.0229073	0.0144878	0.212019	0.222673	0.170727	0.134132	0.0556867	-0.0551966	0.0592499	0.213464	-0.23625	-0.0077171	-0.173568	-0.38401	-0.211542	0.107287	-0.170396	0.199256	-0.214266	-0.239356	-0.0247037	0.212921
ABHD6	3	p14.3	ENST00000295962 // Hs.476454 // ABHD6 // 57406 // abhydrolase domain containing 6	0.00306303	-0.0226147	-0.199376	-0.279805	0.0103548	-0.04578	-0.00982366	0.163705	-0.176948	-0.264814	0.0117485	-0.211378	0.134067	0.0471217	0.183938	-0.240599	-0.220301	0.133268	-0.0640797	0.078485	-0.056745	0.252944	0.151632	0.120851	0.20303	-0.16376	-0.072501	-0.0852226	-0.213097	-0.259425	-0.0927715	-0.126098	0.0239285	-0.291623	0.0841024	-0.198786	0.0576277	-0.263178	0.0166965	-0.0519037	-0.160554
ABI1	10	p12.1	ENST00000346832 // Hs.508148 // ABI1 // 10006 // abl-interactor 1	0.0231251	0.010121	0.215277	0.0893491	-0.0349759	0.156947	0.332337	0.207955	-0.153947	-0.2345	0.204764	-0.276257	0.350166	0.294596	0.0937366	-0.306059	-0.237133	0.0307906	0.0808757	-0.0158931	-0.185347	0.191482	0.172099	0.41234	0.068026	-0.118542	0.00430652	-0.633935	-0.25988	-0.327951	-0.573771	-0.260585	0.0914229	-0.101861	0.29309	-0.11297	0.157137	-0.3213	-0.119162	-0.521192	-0.0658464
ABI2	2	q33.2	ENST00000261017 // UTR-3 // 0 // Hs.471156 // ABI2 // 10152 // abl-interactor 2	0.415745	0.379599	-0.136633	-0.365327	0.504134	0.17072	0.210156	-0.547691	0.19028	0.280323	-0.379744	-0.0179168	0.11274	0.0268467	-0.415034	0.0856634	-0.307646	-0.422428	-0.366095	-0.0813078	-0.0475769	-0.438911	-0.31532	-0.432646	-0.387136	0.179413	0.0542365	-0.107421	-0.014924	-0.395587	-0.0940171	-0.187747	-0.327852	0.309839	0.0394723	-0.190479	-0.405566	-0.425739	0.390662	-0.0479566	0.0259079
ABI3	17	q21.32	ENST00000225941 // Hs.130719 // ABI3 // 51225 // ABI family, member 3	0.0337612	-0.0608747	0.331067	-0.490513	0.0670011	0.204986	-0.118151	0.219945	0.599062	-0.139812	0.0516232	0.0666087	-0.124938	-0.009537	-0.321994	-0.0012769	0.0900471	-0.25686	-0.508829	0.114645	-0.10663	0.0073423	0.0766632	0.170041	-0.224817	0.588948	0.101878	-0.186173	0.0786069	0.0825521	-0.066538	0.383718	-0.374129	-0.0801795	0.006602	0.386156	0.150388	0.0836469	0.152383	-0.0961492	-0.0023501
ABI3BP	3	q12.2	ENST00000284322 // Hs.477015 // ABI3BP // 25890 // ABI family, member 3 (NESH) binding protein	0.0554069	0.0618938	0.292481	-0.384129	-0.222667	-0.0269767	-0.00527002	0.194988	0.474826	0.211447	0.517638	0.275793	0.520762	0.103463	0.127058	0.220527	0.0537684	0.105194	-0.349785	0.0528345	0.0796816	0.344006	0.307141	0.172602	0.140117	0.467344	-0.0750525	0.311826	0.287514	0.0886672	0.288257	0.322157	-0.33842	0.228118	0.0952168	0.243902	0.327391	0.0915125	-0.211523	0.253384	0.123894
ABL1	9	q34.12	ENST00000372348 // Hs.431048 // ABL1 // 25 // c-abl oncogene 1, non-receptor tyrosine kinase	-0.256077	-0.243149	0.261848	-0.249239	-0.405671	0.0912916	0.143082	0.330645	-0.0807506	-0.197175	0.449931	0.190166	-0.0851743	0.411795	0.187335	-0.258599	0.225257	0.22361	-0.383827	0.03682	0.0892312	0.282052	0.27835	0.420493	0.19095	-0.0784027	0.0794349	0.32163	0.164094	0.275079	0.26726	0.29442	-0.371173	-0.172876	0.389676	0.18398	0.196672	0.271774	-0.388788	0.297413	0.113883
ABL2	1	q25.2	ENST00000367623 // Hs.159472 // ABL2 // 27 // v-abl Abelson murine leukemia viral oncogene homolog 2	0.209122	0.20446	0.0586244	-0.422354	0.163002	-0.0728304	-0.074014	0.0556277	0.18586	0.0963976	0.00510316	0.0206518	0.364188	0.0532179	-0.3629	0.0553617	-0.00131148	-0.377589	-0.386157	0.0143213	0.141295	0.138355	-0.0146903	0.108188	-0.344864	0.168567	-0.106469	0.431115	-0.00260581	-0.0329339	0.433765	0.103178	-0.365142	-0.0021148	0.0629575	0.103753	-0.0360614	-0.0418762	0.168813	0.407266	-0.00619776
ABLIM1	10	q25.3	ENST00000277895 // Hs.438236 // ABLIM1 // 3983 // actin binding LIM protein 1	0.0522518	0.0519951	-0.245028	0.0662604	0.011564	-0.347605	-0.337374	0.184319	-0.0638496	0.138995	-0.331423	-0.192946	0.142103	0.12266	0.495758	0.13444	-0.192026	0.821119	0.0792164	0.0140874	-0.0273786	0.168901	-0.0280076	0.223052	0.469362	-0.0657247	-0.24102	-0.0349967	-0.199351	-0.248305	-0.0199821	-0.171474	0.0742388	0.0719812	0.129266	-0.196881	-0.0881881	-0.244402	-0.0975934	-0.0220868	-0.129899
ABLIM2	4	p16.1	ENST00000296372 // Hs.233404 // ABLIM2 // 84448 // actin binding LIM protein family, member 2	0.0675258	0.0636911	-0.23217	0.0978874	-0.0862378	0.149512	-0.0394263	0.203271	-0.0562634	-0.690941	-0.251768	0.0683685	-0.0656712	-0.306812	0.239354	-0.753211	0.0335783	0.236972	0.12579	-0.00363215	-0.00369697	0.244736	-0.257557	-0.360823	0.239535	-0.0335846	0.051461	0.0246937	0.0931116	0.0506826	0.00890817	-0.177533	0.067538	-0.157813	-0.31311	-0.206416	-0.299568	0.109655	-0.0902617	0.00714205	0.0984802
ABLIM3	5	q32	ENST00000309868 // Hs.49688 // ABLIM3 // 22885 // actin binding LIM protein family, member 3	0.0766674	0.027948	0.0615922	0.0491037	0.0458699	0.060598	0.0403448	0.0227717	0.29767	0.429263	0.521156	0.0610278	0.0793916	0.156912	0.164314	0.373381	-0.170315	0.137434	0.090796	-0.0802064	0.0942546	0.00193998	0.353786	0.200336	0.176827	0.320389	-0.0814848	0.38463	0.056487	-0.240448	0.332629	0.135898	-0.00177115	0.187576	0.135694	0.140951	0.403472	-0.152908	0.066261	0.299536	0.0160412
ABO	9	q34.2	ENST00000538324 // Hs.654423 // ABO // 28 // ABO blood group (transferase A, alpha 1-3-N-acetylgalactosaminyltransferase; transferase B, alpha 1-3-galactosyltransferase)	-0.36752	-0.321153	0.334676	-0.5263	-0.473141	0.149953	0.202315	0.37159	-0.0865871	-0.245957	0.673462	0.212196	-0.0940513	0.461568	0.275151	-0.28078	0.208494	0.259668	-0.518064	0.0330446	-0.0141382	0.351127	0.317724	0.421987	0.229416	-0.0317456	0.114836	-0.0973363	0.182393	0.220461	-0.0573219	0.325044	-0.433978	-0.152849	0.44782	0.246067	0.294445	0.20857	-0.468902	-0.0612517	0.0857408
ABR	17	p13.3	ENST00000291107 // Hs.159306 // ABR // 29 // active BCR-related	0.00341911	0.00364504	-0.163666	-0.396548	0.183972	-0.133397	-0.063817	-0.21633	-0.0882317	-0.167301	-0.245503	-0.306498	0.0389415	-0.31293	-0.206999	-0.21207	-0.068294	-0.203483	-0.375698	-0.0314232	-0.034099	-0.223956	-0.225599	-0.320916	-0.174575	-0.100492	-0.0402392	-0.0327185	-0.329235	-0.141722	0.0200036	-0.173369	-0.344791	-0.0789285	-0.286306	-0.282465	-0.277359	-0.105826	0.149293	-0.00477101	-0.23052
ABRA	8	q23.1	ENST00000311955 // Hs.374668 // ABRA // 137735 // actin-binding Rho activating protein	0.441645	0.295072	0.582882	0.630352	0.28927	0.225315	0.180454	0.525392	0.336121	-0.168922	0.61494	0.181804	-0.236477	0.698193	0.401077	-0.214357	-0.160704	0.388035	0.602818	0.226262	0.279418	0.58463	0.758077	0.83667	0.419418	0.353476	0.10516	0.650032	0.20419	-0.211581	0.62075	0.675469	0.610381	0.0658599	0.646281	0.592388	0.762754	-0.230235	0.242224	0.583047	0.0585131
ABRACL	6	q24.1	ENST00000367660 // Hs.600861 // ABRACL // 58527 // ABRA C-terminal like	-0.292946	-0.260314	-0.313666	-0.521397	-0.138611	-0.0883669	0.171682	-0.0160388	-0.275769	-0.670074	-0.490388	-0.691925	-0.134594	-0.0792864	0.380085	-0.754141	0.526026	0.336355	-0.477925	-0.0277265	0.0059693	0.105172	-0.311352	0.021631	0.348526	-0.279156	0.0232442	0.148911	-0.740096	0.61547	0.113213	-0.381522	-0.458466	-0.27312	-0.0267551	-0.348513	-0.424573	0.606483	-0.0871567	0.197011	-0.623438
ABT1	6	p22.2	ENST00000274849 // Hs.254406 // ABT1 // 29777 // activator of basal transcription 1	-0.323379	-0.294631	-0.291151	0.264396	-0.128107	0.314288	0.346846	0.365523	0.438185	0.0612095	-0.192979	0.00667409	-0.14774	-0.0517122	-0.433696	0.0794816	0.0570932	-0.475335	0.339848	0.0982536	0.0868556	0.330203	-0.346325	0.0531814	-0.406886	0.485827	0.171291	0.265998	-0.0534829	0.0255775	0.26157	-0.280905	0.333369	0.426202	-0.0152758	-0.329638	-0.302681	0.00114403	-0.118146	0.235986	0.000744667
ABTB1	3	q21.3	ENST00000232744 // Hs.107812 // ABTB1 // 80325 // ankyrin repeat and BTB (POZ) domain containing 1	0.0585077	-0.0190333	0.436606	0.4599	-0.18277	0.20495	0.320184	0.228774	0.700618	0.431386	0.341088	0.266746	0.462274	0.37851	0.656907	0.475154	0.350224	0.594622	0.450033	0.0588521	0.229601	0.367488	0.419301	0.458205	0.714931	0.630515	0.151173	0.681488	0.355994	0.386409	0.604383	0.267589	0.463297	0.435132	0.413918	0.23241	0.323004	0.406551	-0.20681	0.520714	0.153899
ABTB2	11	p13	ENST00000298992 // Hs.23361 // ABTB2 // 25841 // ankyrin repeat and BTB (POZ) domain containing 2	-0.27277	-0.307122	-0.231	0.0335341	-0.325722	0.38294	0.376463	-0.330967	-0.0793386	-0.676829	0.0196659	-0.179578	0.0898632	-0.420404	-0.347931	-0.76302	-0.184035	-0.34444	0.0260447	-0.133273	-0.042032	-0.323679	-0.00083078	-0.386487	-0.336588	-0.0996647	0.26351	-0.0466057	-0.160006	-0.257426	-0.0450659	-0.180423	0.0277622	0.00950439	-0.374985	-0.204325	-0.0322072	-0.252704	-0.263446	-0.0588173	-0.160388
ACAA1	3	p22.2	ENST00000301810 // Hs.643487 // ACAA1 // 30 // acetyl-CoA acyltransferase 1	-0.267525	-0.25785	0.11553	0.102963	-0.191281	-0.0404728	-0.0246222	0.20873	-0.0937885	-0.18237	0.0960798	0.134502	0.183294	0.0804488	0.217181	-0.155826	-0.0481365	0.227224	0.136798	0.0640084	-0.178555	0.210252	0.19794	0.215715	0.23457	-0.0928773	-0.034708	-0.561458	0.203728	-0.199151	-0.564075	-0.179718	0.0894241	-0.198218	0.141561	-0.209044	0.208332	-0.129103	-0.243645	-0.561956	0.189528
ACAA2	18	q21.1	ENST00000285093 // Hs.200136 // ACAA2 // 10449 // acetyl-CoA acyltransferase 2	-0.221075	-0.270482	-0.649952	-0.543484	-0.38673	0.0653887	-0.387657	0.213451	-0.0255202	-0.164452	-0.28237	-0.173931	-0.18492	-0.317466	0.24949	-0.175826	-0.212591	0.467708	-0.474608	0.00314475	-0.130524	0.215766	0.245093	-0.321299	0.425644	-0.106018	0.0194327	-0.572834	-0.163488	-0.204443	-0.436955	-0.674234	-0.411233	-0.280379	-0.316012	-0.675956	-0.0262628	-0.124691	-0.352188	-0.466707	-0.152008
ACACA	17	q12	ENST00000353139 // Hs.160556 // ACACA // 31 // acetyl-CoA carboxylase alpha	0.300702	0.27081	-0.220013	-0.442495	0.132569	0.155811	-0.0376616	-0.109431	-0.104053	-0.217623	0.0134226	-0.536257	-0.379474	0.063201	-0.351626	-0.211223	0.0316683	-0.380064	-0.417384	-0.125675	-0.0233439	-0.214709	0.0143792	0.115801	-0.339003	-0.0899933	0.0502872	-0.0345856	-0.534902	0.0499643	-0.0335002	-0.195962	-0.379546	-0.106018	0.0849422	-0.208208	0.000528603	0.0356824	0.212493	-0.016515	-0.428773
ACACB	12	q24.11	ENST00000338432 // Hs.234898 // ACACB // 32 // acetyl-CoA carboxylase beta	-0.261787	-0.24049	-0.168192	0.057217	-0.293297	0.50168	0.524733	0.00400243	0.222335	0.124094	0.0139527	0.0341785	-0.0799648	-0.00368091	-0.342772	0.0357187	-0.181431	-0.369179	0.0526671	0.00574633	0.0560041	0.00878723	0.0258827	0.00521561	-0.344794	0.214238	0.298726	-0.0488387	0.0477589	-0.290565	-0.0358723	-0.130286	0.0625136	-0.167414	0.107414	-0.16613	0.081713	-0.299219	-0.276583	-0.0383021	0.0230313
ACAD10	12	q24.12	ENST00000313698 // Hs.331141 // ACAD10 // 80724 // acyl-CoA dehydrogenase family, member 10	-0.262303	-0.243156	-0.163463	0.0288867	-0.257036	0.131416	0.254287	0.0383312	0.141706	0.0988262	0.00735093	0.0157195	-0.110299	-0.0340497	-0.315	-0.0400139	-0.168654	-0.301773	0.0250717	0.0229731	0.0142786	0.0239856	0.00559195	-0.00326871	-0.289873	0.168267	0.0504611	-0.0871464	0.00422412	-0.342972	-0.0333378	-0.140588	0.0362165	-0.172392	0.101254	-0.207485	0.0524822	-0.329855	-0.239781	-0.035756	-0.0211449
ACAD11	3	q22.1	ENST00000264990 // Hs.441378 // ACAD11 // 84129 // acyl-CoA dehydrogenase family, member 11	0.0256715	0.0408765	0.23099	0.337527	-0.224103	0.516761	0.493184	0.169731	0.473015	0.276361	0.176414	0.202753	0.413416	0.306289	0.398196	0.285747	0.213452	0.389346	0.372251	0.0275377	0.132144	0.319839	0.277477	0.354949	0.368066	0.458537	0.362172	0.421632	0.19057	0.260878	0.405364	0.273936	0.334728	0.291375	0.346752	0.207849	0.209102	0.240929	-0.229807	0.386864	0.11288
ACAD8	11	q25	ENST00000281182 // Hs.14791 // ACAD8 // 27034 // acyl-CoA dehydrogenase family, member 8	-0.203152	-0.213726	0.0688401	0.210974	0.0264361	0.245875	0.0377281	-0.0563452	0.0989128	-0.165398	0.0419098	-0.197528	-0.10669	0.205094	0.652216	-0.275274	0.130203	0.436398	0.160143	0.0601558	0.0823836	-0.179441	-0.0309534	0.195337	0.567701	0.0562506	0.252773	0.391065	-0.197877	0.146196	0.395089	-0.0689644	0.158685	0.191228	0.195874	-0.111828	-0.0501563	0.11656	-0.0399021	0.35335	-0.106777
ACAD9	3	q21.3	ENST00000308982 // Hs.567482 // ACAD9 // 28976 // acyl-CoA dehydrogenase family, member 9	0.0916924	0.0661623	0.377191	0.460264	-0.282963	0.595939	0.639609	0.260457	0.641013	0.3333	0.362004	0.42645	0.416086	0.38643	0.603226	0.395622	0.483254	0.533121	0.42911	0.127486	0.213084	0.426017	0.494553	0.353717	0.607983	0.599632	0.461144	0.664854	0.460839	0.537439	0.610409	0.403439	0.411277	0.358152	0.419544	0.282693	0.423061	0.502258	-0.305273	0.603349	0.354965
ACADL	2	q34	ENST00000233710 // Hs.471277 // ACADL // 33 // acyl-CoA dehydrogenase, long chain	0.0341363	0.0614047	0.0773301	-0.432335	0.0319947	0.221169	0.251857	-0.551631	-0.0719609	0.232318	-0.344532	-0.0178188	0.0211375	0.0254652	-0.395169	0.0584561	-0.225145	-0.438273	-0.378242	-0.11679	-0.0621446	-0.496994	-0.262863	-0.452288	-0.3566	-0.0936845	0.114205	-0.110957	-0.0462776	-0.294613	-0.0478344	0.119794	-0.336766	0.267572	0.0341779	-0.0413007	-0.346655	-0.280124	-0.0235678	-0.0250771	-0.000865235
ACADM	1	p31.1	ENST00000528016 // Hs.445040 // ACADM // 34 // acyl-CoA dehydrogenase, C-4 to C-12 straight chain	-0.227235	-0.191245	-0.0137489	0.121289	0.0119326	-0.074274	-0.0750499	-0.00714231	-0.116889	0.0942159	-0.0204867	-0.0138525	-0.117351	-0.398047	0.0915643	0.0541082	0.0105685	0.0896109	0.125103	-0.0257693	-0.0663353	0.0632675	-0.0191601	-0.370781	0.131344	-0.129302	-0.0869454	-0.141035	-0.0319423	0.00335384	-0.0423229	0.155215	0.122447	-0.163933	-0.32019	0.101088	-0.0567213	-0.0525278	0.0230869	-0.0876841	0.0191562
ACADS	12	q24.31	ENST00000242592 // Hs.507076 // ACADS // 35 // acyl-CoA dehydrogenase, C-2 to C-3 short chain	-0.248561	-0.216682	-0.36893	-0.511811	-0.266886	0.136038	0.0713467	-0.210279	0.153589	-0.155123	-0.134565	-0.106401	-0.315621	-0.11029	-0.489847	-0.120027	-0.311651	-0.49268	-0.388706	-0.28242	-0.130766	-0.272437	-0.134621	-0.0624504	-0.512375	0.186562	-0.113244	-0.257638	-0.0689471	-0.458134	-0.22526	-0.300671	-0.432833	-0.31341	-0.0635655	-0.429787	-0.0538598	-0.381611	-0.263351	-0.189823	-0.153834
ACADSB	10	q26.13	ENST00000358776 // Hs.81934 // ACADSB // 36 // acyl-CoA dehydrogenase, short/branched chain	0.29744	0.219918	0.189289	0.136429	0.0436102	-0.365266	-0.331614	0.218747	-0.0366199	0.173689	-0.270164	-0.190627	0.203076	0.163999	0.138746	0.182496	-0.200364	0.411966	0.12765	0.0632776	-0.0394749	0.20935	-0.0426167	0.224501	0.163994	-0.0773047	-0.262131	-0.0372027	-0.16899	-0.219935	0.0166224	0.288021	0.087901	0.0493194	0.17188	0.286008	-0.094549	-0.172805	-0.0338173	-0.00781953	-0.128527
ACADVL	17	p13.1	ENST00000322910 // Hs.437178 // ACADVL // 37 // acyl-CoA dehydrogenase, very long chain	0.190916	0.00914533	-0.236723	-0.500738	0.19723	-0.284415	-0.274493	-0.270382	-0.212874	-0.341033	0.0905933	-0.339366	-0.178083	-0.49237	-0.439996	-0.267491	-0.11538	-0.287073	-0.421148	-0.128907	0.035426	-0.210497	0.0139843	-0.397275	-0.314571	-0.0587117	-0.232244	0.024974	-0.375843	-0.252099	-0.042853	-0.243542	-0.442257	-0.111439	-0.307809	-0.307651	-0.056957	-0.207891	0.201674	-0.046844	-0.35428
ACAN	15	q26.1	ENST00000268134 // Hs.2159 // ACAN // 176 // aggrecan	0.0735161	0.0477061	-0.207059	0.677328	0.0814872	-0.379489	-0.354061	-0.0693728	0.0467985	-0.140425	-0.345856	0.0900405	-0.334214	0.143799	0.188887	-0.154444	0.0882367	0.221812	0.655749	0.0547409	0.157899	0.0938626	-0.314538	0.181031	0.23635	0.00303407	-0.223773	0.625428	0.0814757	0.122107	0.554442	-0.136022	0.603576	-0.0595977	0.123764	-0.157016	-0.34529	0.147592	0.179306	0.539718	0.219814
ACAP1	17	p13.1	ENST00000158762 // Hs.337242 // ACAP1 // 9744 // ArfGAP with coiled-coil, ankyrin repeat and PH domains 1	0.12213	0.26929	-0.387491	-0.522267	0.225101	-0.0827607	-0.205393	-0.197315	-0.0468503	-0.363412	0.0690993	-0.336616	0.106581	-0.339937	-0.259858	-0.290627	-0.205518	-0.29155	-0.530383	-0.224675	-0.204945	-0.218439	0.120894	-0.372958	-0.359059	-0.156255	-0.124513	-0.237912	-0.420102	-0.219431	-0.114109	-0.360304	-0.578353	-0.012645	-0.364688	-0.195681	-0.124615	-0.241095	0.201494	-0.111043	-0.342919
ACAP2	3	q29	ENST00000326793 // Hs.593373 // ACAP2 // 23527 // ArfGAP with coiled-coil, ankyrin repeat and PH domains 2	0.393798	0.220802	0.716852	0.286467	0.313555	0.464114	0.458378	0.779486	0.538569	0.521431	0.437851	0.670678	0.416241	0.552037	0.372105	0.469713	0.301977	0.336882	0.299757	0.250592	-0.0243081	0.784817	0.340773	0.642206	0.345812	0.532095	0.328218	-0.0948773	0.678876	0.385869	-0.0951736	0.594021	0.311659	0.453302	0.558858	0.64395	0.331605	0.315926	0.22114	-0.029961	0.57787
ACAP3	1	p36.33	ENST00000353662 // Hs.535257 // ACAP3 // 116983 // ArfGAP with coiled-coil, ankyrin repeat and PH domains 3	-0.172462	-0.166843	-0.101527	0.374654	-0.0770968	-0.153947	-0.36961	0.415634	0.339104	0.643765	0.139129	0.0623883	0.351119	0.149029	0.555857	0.774581	0.211602	0.314588	0.464859	0.20465	0.0303407	0.390397	0.0585507	0.152046	0.634484	0.384894	-0.152792	0.0437974	0.0660299	0.20912	0.0360626	-0.0401622	0.375142	0.0369782	0.138972	-0.07958	0.0961742	0.326494	0.0191944	0.00257119	0.0210269
ACAT1	11	q22.3	ENST00000265838 // Hs.232375 // ACAT1 // 38 // acetyl-CoA acetyltransferase 1	-0.254818	-0.262807	0.00378228	0.540014	0.0191282	0.101118	-0.034771	-0.293684	-0.058774	0.369454	0.0225087	-0.239514	-0.126431	-0.257239	0.379006	0.380686	0.00376834	0.0979879	0.459902	-0.0783455	-0.0135562	-0.305913	-0.0386867	-0.36042	0.207753	-0.0687802	-0.0463081	-0.0671615	-0.260679	0.00351691	-0.019026	-0.155832	0.4712	-0.00766353	-0.304557	-0.18941	-0.0411476	-0.110535	-0.0138699	-0.0474848	-0.211067
ACAT2	6	q25.3	ENST00000367048 // Hs.571037 // ACAT2 // 39 // acetyl-CoA acetyltransferase 2	-0.253325	-0.205264	-0.244734	-0.552945	-0.160863	-0.350723	-0.349725	-0.823939	-0.0525609	0.0761609	-0.300886	-0.505691	-0.199142	-0.43915	-0.39448	-0.215942	-0.171146	-0.378497	-0.53352	-0.149969	0.344809	-0.60388	-0.350647	-0.397631	-0.394723	-0.0704374	-0.275514	0.5966	-0.518583	-0.242213	0.513869	-0.116369	-0.41161	-0.0199462	-0.387799	-0.133567	-0.375856	-0.220758	-0.137297	0.485805	-0.456331
ACBD3	1	q42.12	ENST00000366812 // Hs.520207 // ACBD3 // 64746 // acyl-CoA binding domain containing 3	0.282762	0.311326	0.024687	-0.480137	0.266372	-0.0613814	-0.0776059	-0.342981	-0.0775846	-0.206929	-0.0949681	-0.0487673	0.0656349	-0.460903	-0.356203	-0.225518	0.0516077	-0.3883	-0.423968	-0.116408	-0.227384	-0.39942	0.134239	-0.424061	-0.371288	-0.130113	-0.120089	-0.273266	-0.067916	-0.00565556	-0.192933	0.250962	-0.483517	-0.00830437	-0.330031	0.200774	-0.0226891	-0.0207657	0.265008	-0.164962	-0.1279
ACBD4	17	q21.31	ENST00000321854 // Hs.110298 // ACBD4 // 79777 // acyl-CoA binding domain containing 4	0.129966	0.032581	-0.269139	-0.598028	0.145291	0.078625	-0.0941385	0.208721	-0.195437	-0.140364	-0.076216	-0.030009	-0.367171	0.087679	-0.23639	-0.202361	0.156022	-0.214396	-0.514514	-0.0044885	-0.111848	0.178703	-0.099378	0.0243595	-0.394744	-0.165175	0.0125195	-0.078299	-0.0728285	0.191126	-0.078362	-0.205288	-0.354563	-0.076813	0.172831	-0.13658	0.050131	0.092661	0.187669	-0.0789715	0.008482
ACBD5	10	p12.1	ENST00000375889 // Hs.530597 // ACBD5 // 91452 // acyl-CoA binding domain containing 5	0.00175879	-0.00802079	0.209821	0.086002	-0.000580976	0.107153	0.264319	0.104476	-0.138243	-0.22264	0.132464	-0.298326	0.381907	0.227683	0.0848695	-0.3314	-0.19904	0.0372733	0.0686696	-0.0660004	-0.147609	0.0563765	0.157452	0.367315	0.0113278	-0.1182	0.00570279	-0.618503	-0.304981	-0.382073	-0.567752	-0.301516	0.0838604	-0.0654855	0.288346	-0.120598	0.0840048	-0.354613	-0.0954358	-0.481213	-0.0856142
ACBD6	1	q25.3	ENST00000367595 // Hs.200051 // ACBD6 // 84320 // acyl-CoA binding domain containing 6	0.223912	0.190208	0.0268185	0.110961	0.138775	-0.0390887	-0.0508757	0.0429065	0.222839	0.121157	0.36047	-0.00858755	0.376697	0.0868077	-0.36235	0.0924409	0.0169018	-0.395382	0.10225	-0.00220514	0.129347	0.140236	0.170086	0.12012	-0.354397	0.199021	-0.0911667	0.437452	0.00280691	-0.00557399	0.435231	0.0830838	0.116059	-0.00307786	0.0590856	0.051914	0.152956	0.0154326	0.151793	0.404853	-0.00100022
ACBD7	10	p13	ENST00000378211 // Hs.644598 // ACBD7 // 414149 // Acyl-CoA binding domain containing 7	0.0404704	0.0243727	0.242076	-0.408481	0.0130761	0.128706	0.118732	0.152401	-0.173893	0.102803	-0.0320858	-0.233058	0.410977	0.0561656	0.419701	0.0575786	-0.251103	0.286694	-0.452661	-0.0107552	-0.068995	0.173004	0.145647	0.0791362	0.371887	-0.166021	0.0424864	-0.128171	-0.206787	-0.362858	-0.030185	-0.180458	-0.464887	-0.0775274	0.0576869	-0.0706654	0.0405986	-0.371964	-0.0788783	-0.045109	-0.0391566
ACCS	11	p11.2	ENST00000527346 // Hs.126706 // ACCS // 84680 // 1-aminocyclopropane-1-carboxylate synthase homolog (Arabidopsis)(non-functional)	-0.28829	-0.339517	-0.198917	-0.516953	-0.373279	0.361442	0.393361	-0.36297	-0.0966371	-0.267212	0.0600584	-0.185847	0.111391	0.092019	-0.42272	-0.256049	-0.20139	-0.427095	-0.467869	-0.136278	0.0698039	-0.415252	0.0375726	0.152123	-0.349619	-0.0645412	0.293088	0.342187	-0.188718	-0.286014	0.27765	-0.155366	-0.460261	0.0371455	0.107234	-0.202977	0.0604658	-0.27309	-0.338121	0.283919	-0.156987
ACCSL	11	p11.2	ENST00000378832 // Hs.558851 // ACCSL // 390110 // 1-aminocyclopropane-1-carboxylate synthase homolog (Arabidopsis)(non-functional)-like	-0.281886	-0.240996	-0.185852	-0.422943	-0.306905	0.399515	0.368481	-0.324253	-0.090191	-0.14484	0.050679	-0.169675	0.147583	0.16967	-0.372196	-0.106886	-0.112836	-0.364611	-0.373732	-0.0906914	0.0452786	-0.345872	-0.0345796	0.146238	-0.318576	-0.123726	0.300385	0.264681	-0.178008	-0.224771	0.27664	-0.145722	-0.408421	0.0398835	0.140079	-0.178209	0.00273187	-0.200052	-0.262778	0.2397	-0.0919411
ACE	17	q23.3	ENST00000490216 // Hs.298469 // ACE // 1636 // angiotensin I converting enzyme (peptidyl-dipeptidase A) 1	0.250307	0.240624	0.289462	0.046698	0.113812	0.351939	0.207348	0.54075	0.275493	-0.13142	-0.0381034	0.518618	0.59298	0.0747613	-0.36564	0.0169294	0.0431161	-0.387663	0.0888898	0.171	-0.031566	0.539447	0.0155648	0.124552	-0.324384	0.281403	0.209209	-0.0827431	0.54447	0.0286922	-0.0379348	0.346786	0.102555	-0.0753798	0.0596548	0.311552	0.0721178	0.0343801	0.20481	-0.017917	0.468166
ACE2	X	p22.2	ENST00000252519 // UTR-3 // 0 // Hs.178098 // ACE2 // 59272 // angiotensin I converting enzyme (peptidyl-dipeptidase A) 2	-0.899757	-0.863886	-0.757458	-0.497932	-1.06857	-0.434893	-0.419235	0.373303	-0.093641	-0.766716	0.270058	-0.680236	-0.255233	-0.545209	0.169127	-0.857824	-0.022395	0.136168	-0.399763	0.00935472	-0.22893	0.462434	0.189281	-0.470967	0.128514	-0.0398104	-0.348023	-0.689372	-0.62494	0.027426	-0.679145	-0.883255	-0.459237	-0.618056	-0.507733	-0.84717	0.235382	0.0742578	-0.842897	-0.556893	-0.578374
ACER1	19	p13.3	ENST00000301452 // Hs.352609 // ACER1 // 125981 // alkaline ceramidase 1	-0.309958	-0.209022	-0.147924	0.0913965	-0.320314	-0.418406	-0.326648	-0.151941	-0.130884	-0.117341	0.0332018	-0.111389	-0.312364	-0.31104	-0.21897	-0.14102	0.179245	-0.209023	0.114252	-0.0301813	-0.0761798	-0.255235	0.0653052	-0.28717	-0.282602	-0.13679	-0.252994	-0.700802	-0.0885167	0.154714	-0.526943	-0.210497	0.0199667	-0.191421	-0.316102	-0.246271	0.000476923	0.102514	-0.27862	-0.540633	-0.159672
ACER2	9	p22.1	ENST00000340967 // Hs.41379 // ACER2 // 340485 // alkaline ceramidase 2	-0.181792	-0.192649	-0.213819	0.109893	-0.302414	-0.0301163	0.135341	0.161282	-0.0684261	-0.611362	0.36963	-0.247759	0.000129931	-0.0460561	0.426926	-0.633145	0.179243	0.313324	0.106086	0.0387607	-0.0275067	0.0946418	0.197824	-0.0112414	0.376134	-0.0538439	-0.00624305	-0.497376	-0.211726	0.245539	-0.45848	-0.173218	0.0846192	-0.174081	0.0411482	-0.189032	0.136267	0.167014	-0.260261	-0.435255	-0.0754542
ACER3	11	q13.5	ENST00000278544 // Hs.23862 // ACER3 // 55331 // alkaline ceramidase 3	0.22907	0.186154	-0.196297	0.417625	0.337859	0.135733	-0.0546724	-0.339852	-0.0274345	0.295818	-0.00913722	-0.173977	0.393235	0.121639	0.120068	0.300438	0.0293329	-0.353629	0.423678	-0.0986907	-0.0038061	-0.353923	-0.0185667	0.0897263	-0.1158	-0.0363605	-0.0398218	-0.0519754	-0.20036	0.0530885	-0.0530338	-0.198534	0.397212	0.052822	0.0953105	-0.202433	-0.0311624	0.0410095	0.326496	-0.0238163	-0.148173
ACHE	7	q22.1	ENST00000445236 // Hs.154495 // ACHE // 43 // acetylcholinesterase	0.358644	-0.268446	0.624209	-0.416219	0.557157	0.230247	0.341141	0.053902	0.142124	0.330898	0.19064	0.03855	0.400141	-0.315624	0.161816	0.251051	0.409229	0.356336	-0.525088	0.001372	0.083387	0.260233	0.028428	-0.148807	0.188748	-0.0364665	0.187148	-0.0253195	0.0910505	0.345633	0.020687	0.400906	-0.429866	0.199933	-0.311188	0.474135	-0.0119285	0.292826	0.396738	0.0683575	0.150609
ACIN1	14	q11.2	ENST00000262710 // Hs.124490 // ACIN1 // 22985 // apoptotic chromatin condensation inducer 1	-0.27255	-0.249357	-0.251549	0.0357085	-0.35671	-0.0511631	-0.0313504	0.0235528	0.131015	0.383236	0.00364536	0.0383391	-0.0184871	0.0393339	0.239722	0.343936	-0.205009	0.122783	0.033504	0.0111319	-0.0571235	-0.0189171	0.00221164	0.139994	0.203469	0.114361	0.00850503	-0.056121	0.0223558	-0.270153	-0.0680977	-0.25652	0.0606801	0.0574681	0.0372834	-0.20054	0.00552033	-0.181238	-0.337677	-0.0550822	0.0415046
ACLY	17	q21.2	ENST00000352035 // Hs.387567 // ACLY // 47 // ATP citrate lyase	0.0787129	0.0245157	-0.254046	-0.585094	0.0723371	0.0686041	-0.0734232	-0.0708399	-0.161257	-0.203189	0.0490388	-0.428892	-0.45855	0.108886	-0.353555	-0.248237	0.00732397	-0.341826	-0.536528	-0.110613	-0.00861835	-0.167426	0.0512809	0.126145	-0.340207	-0.144986	0.012913	-0.0747111	-0.419928	-0.013421	-0.0822087	-0.300973	-0.463489	-0.0691445	0.114323	-0.269765	0.114336	-0.0710962	0.159088	-0.0948096	-0.352317
ACMSD	2	q21.3	ENST00000283054 // Hs.655728 // ACMSD // 130013 // aminocarboxymuconate semialdehyde decarboxylase	-0.293976	-0.245431	0.253197	-0.443359	-0.416671	-0.0331216	0.00026568	0.0242168	0.260847	-0.220476	-0.281148	0.0623536	0.0840777	0.330237	0.154797	-0.275096	0.236188	-0.459528	-0.422875	-0.0172538	-0.0172546	0.10704	-0.264424	0.145509	-0.173992	0.285108	-0.0689115	-0.0347619	0.0525848	0.292623	-0.0610107	0.332546	-0.39768	0.310515	0.329075	0.249232	-0.290672	0.273878	-0.44686	-0.0347497	0.0104501
ACN9	7	q21.3	ENST00000360382 // Hs.592269 // ACN9 // 57001 // ACN9 homolog (S. cerevisiae)	0.183897	-0.223102	0.0768321	-0.410598	0.296726	0.224092	0.219072	0.0640012	-0.0772977	0.466337	-0.0191575	0.0416575	0.112177	-0.479083	0.066777	0.519351	0.18817	0.0812066	-0.329301	0.044922	-0.0338334	0.155415	-0.00303058	-0.379035	0.0764818	-0.084614	0.118498	-0.0609161	-0.000655542	0.159348	-0.0496033	0.100765	-0.34338	0.0309876	-0.342317	0.0922195	-0.0321842	0.11619	0.314148	-0.0215011	0.0586523
ACO1	9	p21.1	ENST00000309951 // Hs.567229 // ACO1 // 48 // aconitase 1, soluble	-0.265358	-0.256868	-0.223999	0.119771	-0.30353	0.0134036	0.189814	0.21206	-0.0970053	-0.676864	0.37232	-0.262775	-0.0347384	-0.021028	0.404674	-0.687055	0.266806	0.357928	0.117355	0.024826	-0.0281547	0.210593	0.187435	0.00779737	0.384931	-0.0576504	0.0534091	-0.0156794	-0.240052	0.282156	-0.00976752	-0.194529	0.071265	-0.194623	0.0256415	-0.250772	0.0953769	0.283466	-0.334605	-0.0157962	-0.105223
ACO2	22	q13.2	ENST00000216254 // Hs.643610 // ACO2 // 50 // aconitase 2, mitochondrial	-0.32711	-0.275416	-0.243491	-0.522544	-0.110381	-0.111867	-0.0376017	-0.00244089	-0.13447	-0.18724	-0.342863	-0.459884	0.0345755	-0.410273	-0.270995	-0.249742	0.0696839	-0.308065	-0.452573	-0.0814923	-0.0686841	-0.143654	-0.00646676	-0.126548	-0.301871	-0.111659	-0.168762	-0.120683	-0.406155	0.0445289	-0.0756665	-0.196235	-0.445927	-0.197046	-0.327638	-0.100951	-0.10069	0.0097601	-0.108786	-0.0547562	-0.319196
ACOT1	14	q24.3	ENST00000311148 // Hs.568046 // ACOT1 // 641371 // acyl-CoA thioesterase 1	0.382561	0.366374	1.21318	0.909749	0.387512	0.743615	0.768527	-0.8627	0.657677	-0.952249	-0.318554	0.562042	-0.887236	0.303952	-0.840963	-0.900011	-1.17612	-0.798744	1.01029	-0.935157	-1.13723	-0.894785	-0.472297	0.0833966	-0.839349	0.635825	0.716324	-1.00349	0.714023	-1.22547	-1.00555	1.29315	0.818556	0.248338	0.495178	1.11744	-0.368783	-1.00876	0.256848	-1.00943	0.626192
ACOT11	1	p32.3	ENST00000371316 // Hs.729424 // ACOT11 // 26027 // acyl-CoA thioesterase 11	-0.417038	-0.370086	-0.0624107	0.146811	-0.257406	-0.27657	-0.269821	0.149236	0.0123167	-0.346093	-0.016151	0.0257459	0.207122	0.0560902	0.246561	-0.31968	-0.144387	0.25236	0.119198	0.102433	0.0540872	0.212174	-0.0337985	0.0677722	0.207863	-0.0109209	-0.322149	0.32676	0.0338971	-0.126698	0.321487	0.137782	0.13571	-0.0604871	0.0565027	0.087047	-0.100992	-0.0813903	-0.197845	0.27297	-0.00948325
ACOT12	5	q14.1	ENST00000307624 // Hs.591756 // ACOT12 // 134526 // acyl-CoA thioesterase 12	0.0752896	0.0383316	-0.604878	-0.340043	0.0786427	-0.0163236	-0.0335588	-0.175243	-0.536195	-0.450926	0.346802	0.0035596	-0.0934056	-0.398984	-0.332407	-0.227748	-0.195481	-0.385969	-0.307849	-0.022694	0.00862928	-0.235225	0.24719	-0.34105	-0.326065	-0.569996	-0.0873873	-0.0259168	0.0113076	-0.318324	-0.0024276	-0.622262	-0.299269	-0.374812	-0.337279	-0.622692	0.264455	-0.29649	0.0456025	-0.0071879	-0.0397477
ACOT13	6	p22.3	ENST00000537591 // UTR-3 // 0 // Hs.731605 // ACOT13 // 55856 // acyl-CoA thioesterase 13	-0.326151	-0.280646	-0.185908	0.0898126	-0.0854425	0.278053	0.279452	0.346946	0.309941	0.0845288	-0.318863	-0.000321667	-0.347646	0.0495625	-0.309747	0.05622	-0.0260241	-0.346468	0.291934	0.0618648	-0.00435806	0.224982	-0.340332	0.106817	-0.328184	0.298226	0.163106	0.14504	-0.115417	-0.0241868	0.162474	-0.194057	0.23887	0.216415	0.0346033	-0.202106	-0.376833	-0.00989322	-0.049644	0.10174	-0.0702454
ACOT2	14	q24.3	ENST00000238651 // Hs.446685 // ACOT2 // 10965 // acyl-CoA thioesterase 2	-0.17046	-0.0618435	0.607929	0.412262	0.0083212	0.157274	0.143698	-0.0047548	0.323642	0.113555	-0.0292447	0.229363	-0.0100842	0.0545586	-0.223608	-0.0449067	-0.171155	-0.206827	0.458849	0.108321	-0.127748	0.0016111	-0.0100018	0.0051629	-0.200253	0.331307	0.168824	-0.127509	0.242314	-0.282633	-0.0443454	0.702726	0.339166	-0.0285685	0.273172	0.618731	-0.0924105	-0.29755	-0.0894657	-0.112454	0.127483
ACOT4	14	q24.3	ENST00000326303 // Hs.49433 // ACOT4 // 122970 // acyl-CoA thioesterase 4	-0.0629747	-0.0670897	0.542726	0.405135	-0.120592	0.0127003	0.0555287	-0.155862	0.221191	0.0463332	-0.0339066	0.0521669	-0.111033	0.0222346	-0.288156	0.0255707	-0.210736	-0.29881	0.3221	0.0324579	-0.110965	-0.0663034	-0.0159911	-0.0702239	-0.310719	0.292668	-0.0172711	-0.236743	0.114827	-0.34114	-0.131025	0.737614	0.369168	-0.0256441	0.0751842	0.597114	-0.00484972	-0.323299	-0.170461	-0.16046	0.0243422
ACOT6	14	q24.3	ENST00000381139 // UTR-5 // 0 // Hs.122038 // ACOT6 // 641372 // acyl-CoA thioesterase 6	0.0482982	-0.000661	0.55282	0.412931	-0.00364933	0.0012945	-0.0241393	-0.182158	0.230164	0.0786132	0.0324357	-0.00835083	-0.186991	0.0774483	-0.350316	0.00715133	-0.188456	-0.256463	0.325371	0.075025	-0.0837908	-0.173373	-0.0802648	-0.0488687	-0.416621	0.235488	-0.069312	-0.166476	0.0064125	-0.319159	-0.100477	0.72381	0.3657	-0.0937968	0.289843	0.631266	-0.116229	-0.341695	-0.0753933	-0.123689	-0.0644253
ACOT7	1	p36.31	ENST00000361521 // Hs.126137 // ACOT7 // 11332 // acyl-CoA thioesterase 7	-0.254394	-0.25142	-0.1206	0.374679	-0.0914596	0.241693	0.155395	0.351675	0.229347	0.525337	0.0929475	0.052157	0.287519	0.116241	0.541352	0.47312	0.194159	0.246821	0.351069	0.0575785	-0.0155023	0.374963	0.0619659	0.149835	0.55266	0.273064	0.123121	-0.00514676	0.0643238	0.17929	0.0284573	-0.125169	0.345708	0.0865944	0.116127	-0.179645	0.0504195	0.188697	-0.0352442	-0.0139106	0.021367
ACOT8	20	q13.12	ENST00000217455 // Hs.444776 // ACOT8 // 10005 // acyl-CoA thioesterase 8	-0.293579	-0.224901	-0.149009	-0.13431	-0.317005	0.121721	-0.211639	-0.0996885	0.0409695	-0.354814	0.113671	-0.131299	0.730087	0.621243	0.0703945	-0.442972	-0.179115	-0.119533	-0.0296267	-0.143275	0.121186	-0.136181	0.106539	0.820434	0.0321052	0.10625	0.0439013	0.53203	-0.203611	-0.177662	0.470749	0.0892307	0.0592572	0.0619573	0.638933	-0.302491	0.0202837	-0.073722	-0.234585	0.451779	-0.0666375
ACOT9	X	p22.11	ENST00000336430 // Hs.298885 // ACOT9 // 23597 // acyl-CoA thioesterase 9	-0.895355	-0.850927	-0.648491	-0.486207	-0.906621	-0.304483	-0.291011	-0.0312647	-0.220158	-0.628533	0.087784	-0.659754	-0.164746	-0.432372	0.143284	-0.778959	-0.0174588	0.0929302	-0.43114	-0.0549938	-0.2217	0.0317092	0.0543171	-0.384367	0.0958508	-0.203396	-0.241263	-0.698846	-0.582668	-0.0304233	-0.569663	-0.62962	-0.446132	-0.631277	-0.347309	-0.655372	0.0503673	-0.144824	-0.816656	-0.54142	-0.466633
ACOX1	17	q25.1	ENST00000293217 // UTR-3 // 0 // Hs.464137 // ACOX1 // 51 // acyl-CoA oxidase 1, palmitoyl	0.224764	0.224619	0.0191355	0.068014	0.0645763	0.286649	0.147232	0.155556	0.637324	-0.224969	0.0124079	-0.0691572	-0.080321	0.0507185	-0.258557	-0.155049	0.0356153	-0.2398	0.0417755	0.0224336	0.117543	0.202256	0.0635928	0.120841	-0.2836	0.649821	0.119062	0.248335	0.0388098	0.00139307	0.254734	0.0939969	0.085556	-0.0819398	0.119129	0.0570986	0.113441	-0.0516058	0.178292	0.305761	0.00580967
ACOX2	3	p14.3	ENST00000302819 // Hs.444959 // ACOX2 // 8309 // acyl-CoA oxidase 2, branched chain	0.0511514	0.0525953	-0.118482	-0.32761	-0.0203813	-0.0743716	-0.0426276	0.0514555	-0.0497539	-0.208091	-0.000504	-0.209155	0.0821625	0.11542	0.237143	-0.208135	-0.191181	0.255671	-0.0468066	-0.0424408	-0.0601568	0.114293	0.188442	0.130691	0.178396	-0.0680128	-0.0541158	-0.0743636	-0.224716	-0.258632	-0.0150505	-0.167326	0.0180079	-0.284684	0.116563	-0.240048	0.0767476	-0.247247	0.0305564	-0.0314725	-0.154427
ACOX3	4	p16.1	ENST00000356406 // Hs.479122 // ACOX3 // 8310 // acyl-CoA oxidase 3, pristanoyl	0.0211422	0.0284171	-0.181354	0.129511	-0.126847	0.20338	0.0334938	0.232861	-0.0167793	-0.63099	-0.292092	0.121239	0.0395063	-0.222674	0.308146	-0.72279	0.100338	0.275649	0.133655	0.0258244	-0.009153	0.289517	-0.287102	-0.270173	0.315534	0.0112577	0.117776	0.00117375	0.148508	0.0864485	0.00522217	-0.131166	0.0504008	-0.137582	-0.290582	-0.138549	-0.349728	0.135108	-0.110046	-0.036524	0.117144
ACOXL	2	q13	ENST00000389811 // Hs.253320 // ACOXL // 55289 // acyl-CoA oxidase-like	0.0679175	0.0617109	0.238008	0.0920268	-0.146684	-0.0265408	-0.0136872	-0.274628	-0.0419533	-0.201852	-0.301352	0.0519911	0.147713	-0.391835	0.154378	-0.198543	0.286899	0.15371	0.104029	-0.0561441	-0.00575803	-0.266924	-0.291053	-0.360685	0.145338	-0.0275634	-0.0905893	0.0136935	0.0392638	0.353727	0.00316815	0.126412	0.0884824	0.0263072	-0.361945	0.135477	-0.336658	0.346353	-0.0867101	-0.0072868	0.0398549
ACP1	2	p25.3	ENST00000272065 // Hs.558296 // ACP1 // 52 // acid phosphatase 1, soluble	0.25655	0.232722	-0.0407697	0.0683675	0.0404223	-0.0617296	-0.00394545	-0.608483	0.0422011	0.452039	0.299035	0.0606356	0.128846	-0.00643554	0.0579355	0.438774	0.0639658	0.000947727	0.135289	0.0727352	0.0399017	-0.42822	0.223148	-0.38598	0.0682071	-0.0789216	0.196715	0.344171	0.0575775	0.131293	0.345322	-0.194411	0.0743064	0.0574995	-0.158676	-0.37547	0.317861	0.177642	0.0843207	0.334135	0.0629666
ACP2	11	p11.2	ENST00000256997 // Hs.532492 // ACP2 // 53 // acid phosphatase 2, lysosomal	-0.22769	-0.213055	-0.0972034	-0.50198	-0.239746	0.285709	0.300742	-0.385453	-0.0928176	0.0602745	0.0516279	-0.115967	0.174536	0.0659014	0.169343	0.0263467	-0.605519	0.14441	-0.41519	-0.113422	0.0252232	-0.409685	-0.0225902	0.101538	0.186921	-0.0926428	0.208303	0.170408	-0.141391	-0.847305	0.214904	-0.142216	-0.477493	0.0395227	0.0537949	-0.148135	0.00201779	-0.738168	-0.293295	0.203463	-0.203669
ACP5	19	p13.2	ENST00000218758 // Hs.1211 // ACP5 // 54 // acid phosphatase 5, tartrate resistant	-0.387692	-0.290646	-0.247895	-0.199781	-0.517426	0.0218067	0.16503	-0.277402	0.487646	-0.292487	-0.0165037	-0.203883	-0.25021	0.056151	0.273067	-0.380981	0.19806	0.291925	-0.179659	-0.212371	-0.124242	-0.340863	0.0146183	0.043566	0.224486	0.456977	-0.078568	-0.0929493	-0.195954	0.115218	-0.104691	-0.0996203	-0.218255	0.340854	0.065446	-0.240445	0.051451	0.063077	-0.386381	-0.09489	-0.245785
ACP6	1	q21.2	ENST00000369238 // Hs.562154 // ACP6 // 51205 // acid phosphatase 6, lysophosphatidic	0.247545	0.192314	0.126163	0.0602549	0.194028	-0.0764904	-0.0430476	0.21443	0.232925	0.373693	0.0290961	0.01222	0.445218	0.102631	0.13074	0.354265	0.0344712	0.101319	0.0843003	0.020122	0.143977	0.167091	-0.0163684	0.170073	0.164476	0.233246	-0.0498564	0.513938	0.0782884	0.0384891	0.505727	0.145062	0.0443672	0.12317	0.0655723	0.229073	-0.0111644	0.0771	0.221484	0.445416	-0.0211084
ACPP	3	q22.1	ENST00000336375 // Hs.433060 // ACPP // 55 // acid phosphatase, prostate	0.0749012	0.112183	0.215259	0.462843	-0.146945	0.544041	0.529346	0.139271	0.52462	0.250484	0.221062	0.250288	0.461859	0.330315	0.448596	0.267173	0.241914	0.397632	0.409691	0.0616684	0.221588	0.290308	0.33372	0.349899	0.378554	0.499446	0.406101	0.515944	0.300257	0.266821	0.466386	0.291473	0.417886	0.353209	0.356681	0.245158	0.276465	0.240093	-0.184264	0.43584	0.138136
ACR	22	q13.33	ENST00000216139 // Hs.370870 // ACR // 49 // acrosin	-0.313186	-0.32634	-0.0129564	-0.288827	-0.0174486	-0.142974	-0.136917	-0.128004	0.0609296	-0.0893934	-0.359351	-0.409596	-0.225898	-0.0305449	0.00381614	-0.00450629	-0.271359	0.0287143	-0.576184	0.0333741	-0.0929899	-0.0738754	-0.0345523	0.078781	-0.0519633	0.0223079	0.0792836	-0.43411	-0.348115	-0.315803	-0.366911	0.0163801	-0.227562	-0.0655624	-0.0259089	0.0784337	-0.191657	-0.318383	-0.0414561	-0.394402	-0.333458
ACRBP	12	p13.31	ENST00000229243 // Hs.123239 // ACRBP // 84519 // acrosin binding protein	0.266647	0.282556	0.306146	-0.45462	0.229145	-0.279954	-0.328234	-0.264615	-0.142513	0.519891	0.553758	0.0600002	-0.22838	-0.392079	-0.28083	0.440381	0.236137	-0.37658	-0.383753	-0.0649625	-0.0551375	-0.328597	0.520577	0.157588	-0.221504	-0.0459888	-0.25608	-0.0804853	0.0596464	0.258182	-0.0640623	0.387554	-0.403012	-0.206801	-0.341957	0.29558	0.498112	0.265477	0.198802	-0.075534	0.0755087
ACRC	X	q13.1	ENST00000373695 // Hs.135167 // ACRC // 93953 // acidic repeat containing	-0.162944	-0.209997	-0.624711	0.0638891	-0.275453	0.391373	0.416682	-0.0560946	-0.0722494	-0.0749361	0.242288	-0.262702	0.140154	-0.438879	0.0974535	-0.191386	0.290425	0.0357219	0.0907445	-0.014756	-0.156977	0.0625304	0.167249	-0.364913	0.0923866	-0.131159	0.303849	-0.725746	-0.115504	0.218503	-0.645699	-0.162505	0.113504	-0.613766	-0.433264	-0.267163	0.117802	0.323672	-0.249492	-0.556273	0.131145
ACRV1	11	q24.2	ENST00000257382 // Hs.169222 // ACRV1 // 56 // acrosomal vesicle protein 1	-0.2708	-0.245313	0.080186	-0.343874	0.0371225	0.24971	0.0055905	-0.284639	-0.003381	-0.264516	0.195698	-0.139355	-0.082346	0.179229	0.529011	-0.374	0.084432	0.256577	-0.324811	-0.142253	0.0395965	-0.238961	0.0131083	0.0963685	0.337204	-0.0138668	0.0323833	0.106395	-0.243217	0.088752	0.0219485	-0.194515	-0.330733	0.0250905	0.164379	-0.123873	0.104674	0.0605635	-0.110375	-0.074706	-0.159022
ACSBG1	15	q25.1	ENST00000258873 // Hs.655760 // ACSBG1 // 23205 // acyl-CoA synthetase bubblegum family member 1	-0.0404308	-0.0208392	-0.191988	0.634453	-0.0233815	0.140107	0.17081	-0.676211	0.0113404	-0.160092	0.0191671	0.0320876	-0.335236	-0.418132	-0.252609	-0.214286	0.0998841	-0.287025	0.577621	-0.0943312	0.138894	-0.320117	-0.00878461	-0.345648	-0.251382	-0.0543325	0.0277461	0.546904	0.0639062	0.10419	0.535119	-0.137331	0.590306	-0.0497539	-0.409101	-0.165809	-0.0714047	0.0794753	0.00476355	0.515561	0.198697
ACSBG2	19	p13.3	ENST00000252669 // Hs.465720 // ACSBG2 // 81616 // acyl-CoA synthetase bubblegum family member 2	-0.318796	-0.318328	-0.210936	-0.367891	-0.36114	-0.434785	-0.38305	-0.202118	-0.133175	-0.218523	0.0828972	-0.125428	-0.084342	-0.355479	-0.289214	-0.266894	0.234022	-0.20664	-0.332526	-0.0609276	-0.127381	-0.276838	0.0651461	-0.376229	-0.229265	-0.152588	-0.272836	-0.627063	-0.123154	0.226119	-0.586269	-0.21951	-0.323769	-0.209695	-0.275367	-0.182265	-0.00389894	0.230201	-0.341845	-0.563819	-0.128148
ACSF2	17	q21.33	ENST00000300441 // Hs.288959 // ACSF2 // 80221 // acyl-CoA synthetase family member 2	0.0898648	0.0382801	0.242157	-0.545186	0.05337	0.113337	-0.0461708	0.161732	0.180479	-0.194884	0.0576923	0.0377726	-0.166005	0.0867978	-0.335076	-0.114697	0.0466417	-0.275849	-0.501858	0.0150759	-0.0298915	0.115554	0.0774039	0.0920289	-0.283858	0.193675	0.0671534	-0.0439026	0.0279219	0.0365936	-0.0350169	0.277632	-0.414531	-0.00714227	0.0729947	0.301792	0.174973	0.0257468	0.108419	-0.00189335	0.0491322
ACSF3	16	q24.3	ENST00000317447 // Hs.461727 // ACSF3 // 197322 // acyl-CoA synthetase family member 3	0.319452	0.247786	0.237835	0.630982	0.175872	-0.0835633	-0.00670922	-0.246116	-0.108656	-0.15155	-0.887228	-0.449901	-0.106029	-0.375502	-0.319796	-0.140401	-0.538246	-0.34294	0.640043	-0.0554976	-0.0103309	-0.198087	-0.822369	-0.328774	-0.260946	-0.0836095	-0.0528278	0.0415547	-0.369905	-0.759052	0.0146368	0.138295	0.55756	-0.226597	-0.349947	0.115581	-0.910561	-0.680329	0.17391	-0.00611044	-0.355815
ACSL1	4	q35.1	ENST00000281455 // Hs.406678 // ACSL1 // 2180 // acyl-CoA synthetase long-chain family member 1	-0.348958	-0.337718	-0.219087	-0.543012	-0.357142	-0.395913	-0.362717	-0.384517	-0.0735063	-0.806622	0.0197345	-0.00632067	-0.136014	-0.486999	0.0941004	-0.860195	-0.214454	0.0726462	-0.521794	-0.126649	-0.135143	-0.399427	-0.0620186	-0.3949	0.113812	-0.131001	-0.245298	-0.66075	0.0163327	-0.298215	-0.598037	-0.203326	-0.468115	-0.304409	-0.442508	-0.190843	-0.000427552	-0.260175	-0.326201	-0.586175	-0.0617889
ACSL3	2	q36.1	ENST00000357430 // Hs.655772 // ACSL3 // 2181 // acyl-CoA synthetase long-chain family member 3	0.0048777	-0.0169901	0.0630631	-0.413789	0.0213862	-0.406129	-0.355992	-0.563488	0.168673	0.419707	-0.333114	-0.605117	0.119655	-0.0295089	-0.455978	0.0696229	-0.210309	-0.434735	-0.393132	-0.0631154	0.0602568	-0.492583	-0.315693	-0.403656	-0.415615	0.226202	-0.240321	0.218597	-0.568626	-0.309379	0.20545	0.0903622	-0.370992	0.317833	0.0289577	-0.0377721	-0.362171	-0.273974	-0.0566762	0.184964	-0.451453
ACSL4	X	q23	ENST00000340800 // Hs.268785 // ACSL4 // 2182 // acyl-CoA synthetase long-chain family member 4	-0.716078	-0.665507	-0.388164	0.188005	-0.872174	-0.340526	-0.34294	-0.0944284	-0.0962411	0.0695657	0.256995	0.00935458	-0.0561943	0.0240477	0.44084	0.0692383	0.264414	0.52067	0.185674	-0.015067	-0.0141523	0.0475612	0.194051	-0.410807	0.396487	-0.0549703	-0.256564	0.0089327	0.069432	0.218399	-0.0103553	-0.156667	0.158874	-0.6223	0.0788375	-0.18808	0.212194	0.288224	-0.766002	-0.0396427	0.224068
ACSL5	10	q25.2	ENST00000354655 // Hs.11638 // ACSL5 // 51703 // acyl-CoA synthetase long-chain family member 5	0.0984174	0.0316001	-0.230326	0.124015	-0.0111346	-0.372683	-0.339767	0.173729	-0.152447	0.0315253	-0.314043	-0.238219	0.0770799	0.057951	0.180589	0.0211364	-0.279551	0.457964	0.109246	0.0181566	-0.0559783	0.154008	0.0226897	0.17477	0.170442	-0.101409	-0.322098	-0.0627494	-0.247391	-0.335538	-0.0459588	-0.205906	0.0959581	0.0506687	0.0907978	-0.221805	-0.0871617	-0.315521	-0.102726	-0.057257	-0.191502
ACSL6	5	q31.1	ENST00000413683 // Hs.14945 // ACSL6 // 23305 // acyl-CoA synthetase long-chain family member 6	-0.276255	-0.27966	0.0381139	-0.440212	-0.319205	0.0577828	0.377383	0.0123416	0.181342	0.108831	0.460637	0.0361564	-0.0643247	-0.40442	0.156278	-0.000640747	-0.192779	0.110063	-0.407747	-0.0804252	0.0733463	-0.12255	0.329864	-0.184606	0.138492	0.182599	0.18716	0.301305	0.0256773	-0.231348	0.267491	0.122945	-0.40434	0.136283	-0.36186	0.107676	0.355201	-0.222457	-0.297936	0.226158	-0.0316947
ACSM1	16	p12.3	ENST00000219151 // Hs.306812 // ACSM1 // 116285 // acyl-CoA synthetase medium-chain family member 1	0.00438721	0.0412696	0.253489	0.0349617	0.0484645	0.207938	0.182585	0.174993	-0.123022	-0.00444474	-0.0265451	-0.00569406	-0.0889078	0.0675073	-0.468627	-0.212523	-0.00980835	-0.472769	0.0781849	-0.0133254	-0.06573	0.1466	-0.0212593	0.127411	-0.46532	-0.107073	0.0572417	-0.0491621	-0.0152264	-0.00447395	-0.0544205	0.276436	0.0498915	-0.209228	0.0218763	0.306903	-0.0539418	0.0186642	0.101336	-0.0680806	0.0217605
ACSM2A	16	p12.3	ENST00000219054 // Hs.298252 // ACSM2A // 123876 // acyl-CoA synthetase medium-chain family member 2A	0.0618802	0.0863253	0.254258	0.170732	0.177759	0.287092	0.242715	0.262878	0.0674648	0.0169208	0.111746	0.101324	-0.0219979	0.195561	-0.307271	-0.127893	0.126422	-0.296084	0.156763	0.10277	0.0437034	0.338216	0.00983516	0.21549	-0.272152	-0.0159458	0.129819	0.0851264	0.136092	0.0938219	0.0404248	0.385438	0.135642	-0.168935	0.194749	0.351734	0.0843586	0.125977	0.191905	0.0362661	0.107117
ACSM2B	16	p12.3	ENST00000329697 // Hs.567879 // ACSM2B // 348158 // acyl-CoA synthetase medium-chain family member 2B	0.0249136	0.00167	0.0525675	0.0939221	0.036889	0.203361	0.19535	0.191663	-0.0316613	-0.00885964	0.0491677	0.080292	-0.0661624	0.126849	-0.344926	-0.129342	0.0416214	-0.359273	0.106034	0.0346376	0.0573783	0.218681	-0.0122738	0.14853	-0.332998	-0.0392986	0.0937112	0.0609048	0.0831934	0.0662326	-0.00256368	0.146703	0.0954446	-0.209208	0.1076	0.110049	0.0108864	0.102384	0.085226	-0.0213904	0.0423322
ACSM3	16	p12.3	ENST00000289416 // Hs.706754 // ACSM3 // 6296 // acyl-CoA synthetase medium-chain family member 3	-0.0990721	-0.0701132	0.223164	0.0447739	0.0289395	0.0964688	0.133457	0.196991	-0.0708934	-0.0744171	0.0321231	-0.0380717	-0.0632108	0.0376899	-0.309222	-0.234742	0.00947853	-0.322254	0.0278018	-0.0248375	-0.0383097	0.182465	-0.0411955	0.0991043	-0.305352	-0.152023	-0.0346106	-0.0314827	-0.0529527	0.027448	-0.0406958	0.302502	0.0502319	-0.252667	0.0222654	0.272928	-0.00441378	0.0639399	0.0135796	-0.0795332	-0.03999
ACSM4	12	p13.31	ENST00000399422 // Hs.450804 // ACSM4 // 341392 // acyl-CoA synthetase medium-chain family member 4	0.266689	0.3023	0.326703	-0.370702	0.296934	-0.301388	-0.259493	-0.290676	-0.0494028	0.456884	0.427862	0.0673078	-0.218329	-0.2836	-0.382368	0.488459	0.27579	-0.347743	-0.303768	-0.0823344	-0.0307313	-0.338326	0.405424	0.156738	-0.286118	-0.0239956	-0.229788	-0.0427445	0.0453516	0.298975	-0.029704	0.385818	-0.309404	-0.194482	-0.266948	0.365542	0.353743	0.289505	0.311416	0.000340368	0.0237028
ACSM5	16	p12.3	ENST00000331849 // Hs.659606 // ACSM5 // 54988 // acyl-CoA synthetase medium-chain family member 5	-0.0145403	0.0378183	0.223298	0.0912149	0.0608173	0.165578	0.168121	0.190096	-0.0594992	-0.0149053	0.00657587	0.0559854	-0.0411003	0.137185	-0.385882	-0.218205	0.0661253	-0.405292	0.111405	-0.0106239	-0.0150393	0.199961	-0.0188991	0.161398	-0.349929	-0.0929185	0.0355193	-0.0057338	0.0034963	0.137183	-0.0365246	0.315647	0.0959417	-0.200097	0.126591	0.31728	0.039578	0.099444	0.0791359	-0.00113277	0.0446314
ACSS1	20	p11.21	ENST00000323482 // Hs.529353 // ACSS1 // 84532 // acyl-CoA synthetase short-chain family member 1	0.426633	0.350852	0.00189337	0.0605995	0.309325	-0.290883	-0.00128095	0.26446	0.52166	0.170895	0.325202	0.0905321	0.171701	-0.269687	0.249721	0.17911	0.0696592	0.210861	0.121798	0.0307256	0.152417	0.272096	0.241992	-0.38962	0.239233	0.504604	0.0407807	0.616775	0.117554	0.11355	0.414565	0.366055	0.12975	0.470351	-0.316834	0.0802864	0.205969	0.178647	0.342549	0.364251	0.0859151
ACSS2	20	q11.22	ENST00000253382 // UTR-3 // 0 // Hs.517034 // ACSS2 // 55902 // acyl-CoA synthetase short-chain family member 2	0.546517	0.483673	0.108359	0.0795525	0.284211	0.299867	0.277934	0.275471	0.519407	0.170968	0.296365	0.0958817	0.512351	0.369189	0.241401	0.161226	0.101477	0.232624	0.0955177	0.0623989	0.223674	0.234192	0.249333	0.469594	0.240792	0.467822	0.332829	0.592747	0.0704295	0.0627014	0.4011	0.40155	0.0964644	0.438457	0.463237	0.108557	0.174941	0.056757	0.406299	0.349646	0.0988857
ACSS3	12	q21.31	ENST00000261206 // Hs.259559 // ACSS3 // 79611 // acyl-CoA synthetase short-chain family member 3	-0.259197	-0.25978	-0.226439	0.33215	-0.32063	-0.0277916	-0.00972618	0.0150559	0.205993	0.0454716	0.000760786	-0.0271341	-0.129251	0.279239	-0.446906	0.03954	-0.188439	-0.424637	0.34606	-0.0302758	-0.0507333	-0.010644	0.0339535	0.315498	-0.422736	0.215741	-0.068799	-0.0816295	-0.0172527	-0.26031	-0.0709008	-0.186151	0.342895	-0.177968	0.293583	-0.221726	0.0537741	-0.21237	-0.27288	-0.0592622	-0.00545561
ACTA1	1	q42.13	ENST00000308794 // Hs.1288 // ACTA1 // 58 // actin, alpha 1, skeletal muscle	0.48129	0.337612	0.0586952	-0.481283	0.408766	-0.0207288	0.0391891	-0.39082	-0.0545575	-0.213458	0.0439449	-0.0256896	0.0368237	-0.422076	-0.39498	-0.246592	0.0449906	-0.375148	-0.442802	-0.0705483	-0.0586075	-0.378247	0.185284	-0.387159	-0.375107	-0.071535	-0.0444704	-0.0792926	0.0436531	-0.099899	-0.0265816	0.467688	-0.376155	0.0592196	-0.354272	0.351148	0.0186658	0.00666921	0.409817	-0.0702395	-0.0629569
ACTA2	10	q23.31	ENST00000224784 // Hs.500483 // ACTA2 // 59 // actin, alpha 2, smooth muscle, aorta	0.349987	0.336095	-0.162079	0.112626	-0.0444375	-0.343505	-0.308209	-0.357488	-0.0698194	0.0695258	0.247222	-0.240715	0.090451	0.113898	-0.385996	0.0954481	-0.183447	0.0811985	0.0871785	-0.182975	-0.0291281	-0.397454	0.206593	0.228117	-0.387102	-0.0750031	-0.258404	0.0417931	-0.21976	-0.255502	-0.0537898	-0.229504	0.0107611	0.0403642	0.0917391	-0.153836	0.110832	-0.179345	-0.089232	-0.0227758	-0.168903
ACTB	7	p22.1	ENST00000414620 // Hs.520640 // ACTB // 60 // actin, beta	-0.263139	-0.0589214	0.174171	-0.41062	-0.227788	-0.251522	-0.247885	-0.0779057	-0.106011	0.0939913	0.125015	0.1332	0.159239	-0.308056	-0.115992	0.0313752	0.0523222	-0.0870477	-0.411021	0.0801109	0.298085	0.0231731	0.113253	-0.253347	-0.111628	-0.122864	-0.259578	0.735488	0.10765	-0.0193232	0.751296	0.197966	-0.353143	-0.0399801	-0.220898	0.212495	0.137955	-0.0845815	-0.180563	0.634411	0.109912
ACTG2	2	p13.1	ENST00000438902 // Hs.516105 // ACTG2 // 72 // actin, gamma 2, smooth muscle, enteric	0.340006	0.37706	0.32419	0.0376851	0.2173	-0.0277273	-0.0295907	-0.124998	-0.0607817	0.353231	0.310523	0.114313	0.112729	0.15063	0.462632	0.331592	0.0443322	0.405381	0.0876139	0.0441573	0.0805988	-0.0692158	0.216213	0.205633	0.438879	-0.0571075	-0.0715317	0.343401	0.126865	0.0621639	0.355142	0.120962	0.103059	0.0800997	0.139814	0.124282	0.240756	0.0387261	0.198032	0.318806	0.0869942
ACTL6A	3	q26.33	ENST00000429709 // Hs.435326 // ACTL6A // 86 // actin-like 6A	0.391373	0.214965	0.737415	0.51925	0.27966	0.468917	0.453996	0.602368	0.526625	0.256283	0.357613	0.689323	0.413482	0.487986	0.352279	0.227299	0.158428	0.320672	0.535274	0.139797	0.105239	0.625025	0.301572	0.499271	0.373037	0.518167	0.35289	0.385456	0.66668	0.206396	0.416675	0.759339	0.525294	0.431852	0.473544	0.749978	0.255562	0.162611	0.25035	0.361486	0.574871
ACTL6B	7	q22.1	ENST00000160382 // Hs.259831 // ACTL6B // 51412 // actin-like 6B	0.2088	-0.269652	0.507962	-0.42311	0.3108	0.152865	0.280811	0.162695	-0.145742	0.221382	0.124119	0.0850643	0.142477	-0.351212	0.333385	0.0120211	0.285842	0.294596	-0.358797	0.18231	0.0429993	0.302259	0.162184	-0.325137	0.290506	-0.103763	0.151121	-0.0753303	0.110598	0.134386	0.00722374	0.464753	-0.36616	0.0803049	-0.239574	0.532711	0.0275019	0.0629335	0.303166	-0.0411861	0.125489
ACTL7A	9	q31.3	ENST00000333999 // Hs.123530 // ACTL7A // 10881 // actin-like 7A	-0.227284	-0.180132	0.308097	-0.463677	-0.314031	0.204768	0.197983	0.14532	-0.0674302	-0.170005	0.425326	0.216374	-0.0721326	0.0652252	0.147194	-0.218496	0.263129	0.0869191	-0.432883	0.0476419	-0.181884	0.17029	0.180911	-0.166604	0.160403	-0.105754	0.109303	-0.64675	0.189372	0.284206	-0.538184	0.315218	-0.385537	-0.279763	0.0560224	0.165243	0.131605	0.223081	-0.346015	-0.578363	0.0950683
ACTL7B	9	q31.3	ENST00000374667 // Hs.534390 // ACTL7B // 10880 // actin-like 7B	-0.189454	-0.237761	0.349034	-0.440584	-0.308426	0.239529	0.282044	0.175946	-0.0733381	-0.204036	0.427801	0.245713	-0.0793132	0.0367785	0.0996257	-0.259833	0.22199	0.0803681	-0.43446	0.00623827	-0.19003	0.157186	0.223977	-0.202655	0.131592	0.0101865	0.182756	-0.561536	0.127299	0.266575	-0.652225	0.329642	-0.411126	-0.210988	0.0360345	0.172896	0.227124	0.309354	-0.280219	-0.516706	0.0757978
ACTL8	1	p36.13	ENST00000375406 // Hs.2149 // ACTL8 // 81569 // actin-like 8	0.0231916	0.0118996	0.0731198	0.119039	0.184194	0.290017	0.179001	0.177037	0.396296	-0.115193	0.0959662	0.093521	0.294834	0.163236	0.221215	-0.120097	-0.159981	0.292888	0.143662	0.0558942	-0.0207108	0.217207	0.0621715	0.19725	0.264992	0.39998	0.127448	0.0565254	0.119297	-0.196976	0.0298338	-0.154482	0.0838808	0.166292	0.140917	-0.0300179	0.0742774	-0.136904	0.209907	0.0228652	0.0451806
ACTL9	19	p13.2	ENST00000324436 // Hs.209206 // ACTL9 // 284382 // actin-like 9	-0.318969	-0.265698	-0.145158	0.108749	-0.405078	0.177965	0.272578	-0.303774	0.68868	-0.234113	0.0957875	-0.375413	-0.162241	-0.481111	0.163087	-0.230167	0.284777	0.223629	0.118797	-0.0716181	0.224078	-0.297614	0.0715485	-0.421759	0.205303	0.758065	0.0695352	0.602318	-0.415584	0.317628	0.582734	-0.16398	0.0795402	0.649885	-0.396403	-0.200394	0.0445475	0.212926	-0.382668	0.549773	-0.357716
ACTN1	14	q24.1	ENST00000193403 // Hs.509765 // ACTN1 // 87 // actinin, alpha 1	-0.303924	-0.310737	0.179826	0.0139411	-0.414735	-0.0636651	-0.0623812	-0.239324	0.336593	0.0873377	-0.0452982	-0.0267311	-0.10627	0.0888146	-0.321274	0.0355863	-0.238538	-0.428597	0.0617345	-0.0271937	-0.173491	-0.185245	-0.0318844	0.0263648	-0.371335	0.347982	-0.0547219	-0.726045	0.0195909	-0.292495	-0.615797	0.32131	0.0566475	-0.0181861	0.0132291	0.201526	-0.00856952	-0.217619	-0.351631	-0.604824	-0.0166598
ACTN2	1	q43	ENST00000366578 // Hs.498178 // ACTN2 // 88 // actinin, alpha 2	0.433277	0.389857	0.0249624	-0.35832	0.353235	-0.01382	-0.019619	-0.342221	-0.0173765	0.121824	0.0525304	0.000300522	0.111206	-0.467897	-0.386401	0.0970341	0.0250052	-0.168176	-0.361967	-0.0202452	0.0621534	-0.343124	0.210618	-0.418093	-0.361122	-0.0583747	-0.0137735	0.242005	0.021813	-0.00458996	0.26965	0.365671	-0.341332	0.249195	-0.377562	0.28365	0.0751449	0.0638507	0.352694	0.210541	-0.00360952
ACTN4	19	q13.2	ENST00000252699 // Hs.270291 // ACTN4 // 81 // actinin, alpha 4	0.284586	0.289681	-0.110108	0.4379	0.257622	0.167039	0.434959	0.197336	1.22186	0.181042	0.138328	0.0574494	0.267218	0.176143	0.28692	0.109947	0.397205	0.307491	0.396719	0.073749	0.119705	0.227103	0.100384	0.187352	0.349655	1.16267	0.0529948	0.367287	0.0894062	0.493219	0.319338	0.161144	0.402832	1.08156	0.177927	0.0555783	0.0455117	0.478196	0.186235	0.286889	0.0220285
ACTR10	14	q23.1	ENST00000254286 // Hs.509451 // ACTR10 // 55860 // actin-related protein 10 homolog (S. cerevisiae)	-1.18e-05	0.034242	0.151964	-0.454463	-0.0337833	-0.30478	-0.0316405	-0.308876	0.184438	0.157962	-0.0989733	-0.105642	0.0316601	-0.0502266	-0.389463	0.0601959	0.164486	-0.414642	-0.539007	-0.0850288	-0.200634	-0.174124	-0.00756252	0.0193034	-0.455674	0.20127	0.00842752	-0.651455	-0.106824	0.195478	-0.599812	0.298866	-0.426856	0.0138571	-0.0657574	0.220369	-0.00221756	0.156725	-0.0708678	-0.475655	-0.111823
ACTR1A	10	q24.32	ENST00000369905 // Hs.153961 // ACTR1A // 10121 // ARP1 actin-related protein 1 homolog A, centractin alpha (yeast)	0.0356643	0.0473412	-0.15965	-0.455532	0.0166522	-0.367183	-0.338907	0.214145	-0.0700801	0.143127	-0.339057	-0.136827	0.203156	0.110782	-0.289515	0.086661	-0.196118	0.214984	-0.405645	0.109781	-0.099263	0.282631	0.0245372	0.132821	-0.220045	-0.0921684	-0.23369	-0.0974779	-0.15844	-0.257128	-0.0253756	-0.0624824	-0.371422	0.0963434	0.113262	-0.0798604	-0.0803894	-0.178166	-0.0977587	-0.0925611	-0.0948394
ACTR1B	2	q11.2	ENST00000289228 // Hs.98791 // ACTR1B // 10120 // ARP1 actin-related protein 1 homolog B, centractin beta (yeast)	0.291155	0.193393	0.267149	0.132366	0.120089	0.0102142	0.058636	0.203232	-0.120253	0.18192	-0.00433633	0.0867191	0.201613	0.13889	0.298981	0.034675	0.118239	0.234095	0.116792	0.0175152	-0.0680177	0.199014	-0.0502108	0.140872	0.238653	-0.0675652	-0.032739	-0.107197	0.048634	0.00514111	0.0218466	0.211702	0.121222	-0.0717532	0.100176	0.16605	0.00326533	-0.0108773	0.176215	-0.16798	0.0324643
ACTR2	2	p14	ENST00000260641 // Hs.728857 // ACTR2 // 10097 // ARP2 actin-related protein 2 homolog (yeast)	0.254184	0.207995	0.199792	0.0865953	0.126692	-0.0328345	0.021216	-0.194767	-0.108487	0.361801	0.31481	0.0351977	0.0773462	0.0355838	0.199554	0.300305	0.0355325	0.135644	0.0503906	0.0455689	-0.00172575	-0.0532929	0.296833	0.103938	0.157756	-0.101258	-0.0821901	-0.0444731	0.0246406	0.0556291	-0.0157165	0.117345	0.0657368	-0.0241835	0.0976014	0.107167	0.321124	0.0267021	0.130835	-0.00577611	0.0428714
ACTR3	2	q14.1	ENST00000263238 // Hs.433512 // ACTR3 // 10096 // ARP3 actin-related protein 3 homolog (yeast)	0.0841914	0.063854	0.253256	0.0761003	-0.147781	-0.0439065	-0.0606974	0.20877	0.266518	-0.19993	-0.366531	-0.0110025	0.15085	0.0270557	0.108106	-0.217045	0.256699	0.135437	-0.0479398	0.000708851	-0.0382171	0.151496	-0.339317	-0.0102486	0.114071	0.268433	-0.0596275	-0.0589602	0.00152399	0.30997	-0.0541673	0.124106	0.10473	0.35737	0.0824796	0.115315	-0.390183	0.29079	-0.0987625	-0.0297175	0.0046027
ACTR3B	7	q36.2	ENST00000256001 // Hs.647117 // ACTR3B // 57180 // ARP3 actin-related protein 3 homolog B (yeast)	0.0657303	-0.197346	0.297651	0.112606	-0.0510954	0.206039	0.39381	0.115663	-0.0406104	0.157112	0.0571135	0.0437536	0.158628	-0.228445	0.450294	0.169312	0.206166	0.451367	0.13211	0.0757793	-0.0181333	0.246689	0.00510502	-0.149605	0.45553	-0.0339896	0.153576	0.00136398	0.0368627	0.0973036	0.0259086	0.194351	0.0910332	0.0523051	-0.254612	0.244301	0.012721	0.139137	0.0426003	0.0062855	0.0374327
ACTR3C	7	q36.1	ENST00000477367 // Hs.664579 // ACTR3C // 653857 // ARP3 actin-related protein 3 homolog C (yeast)	-0.26433	-0.668122	0.318924	0.131031	-0.248811	0.352855	0.362099	0.0794076	-0.0484928	0.105681	-0.00214715	0.0525103	0.174596	-0.291477	0.387456	0.121871	0.20068	0.403131	0.111698	0.0318325	-0.00505219	0.187516	-0.0650542	-0.19263	0.410712	-0.0702788	0.162845	0.00201219	0.0442558	0.177513	0.0121166	0.194547	0.122324	0.00128647	-0.337069	0.240178	-0.0224282	0.210574	-0.17297	-0.0219832	0.0454628
ACTR5	20	q11.23	ENST00000243903 // Hs.371585 // ACTR5 // 79913 // ARP5 actin-related protein 5 homolog (yeast)	0.0604631	0.0786404	0.00320326	0.0821196	-0.029953	-0.433325	-0.462277	0.0887798	0.237775	-0.234862	0.302917	0.0228615	0.298847	0.319722	0.215262	-0.235172	0.0939559	0.197217	0.0668288	0.00308221	0.198603	0.104859	0.283884	0.453325	0.184389	0.216976	-0.0602926	0.573923	0.0149409	0.0741122	0.362398	0.364541	0.0975542	0.212676	0.347652	0.101073	0.170104	0.0677373	-0.0328379	0.34445	0.0663173
ACTR6	12	q23.1	ENST00000188312 // Hs.115088 // ACTR6 // 64431 // ARP6 actin-related protein 6 homolog (yeast)	-0.337204	-0.269062	-0.0832522	0.357518	-0.234821	0.399092	0.398232	-0.000216129	0.127239	0.0759457	-0.045851	-0.00392629	-0.0498874	0.207273	-0.372922	0.039164	-0.185435	-0.3721	0.345395	-0.00754448	-0.0229666	-0.040664	-0.0508327	0.264762	-0.321992	0.10872	0.217567	-0.0579915	-0.0113148	-0.325103	-0.0374123	-0.0937015	0.289427	-0.203206	0.287502	-0.155047	-0.0116236	-0.258687	-0.186611	-0.0469529	-0.0181245
ACTR8	3	p21.1	ENST00000335754 // Hs.412186 // ACTR8 // 93973 // ARP8 actin-related protein 8 homolog (yeast)	0.0150478	-0.0465267	-0.374522	-0.237622	-0.0266885	-0.134986	-0.0962397	0.0205558	0.020242	-0.228994	0.121645	-0.18545	0.2897	0.0628485	0.26629	-0.296063	-0.167213	0.173682	-0.149756	-0.0328678	0.0699572	0.099038	0.237373	0.167906	0.193283	0.0153327	-0.156108	-0.108931	-0.175909	-0.34079	-0.0869945	-0.093892	0.0515728	-0.264585	0.118802	-0.186087	0.0745175	-0.308291	0.0241542	0.00780175	-0.0633953
ACTRT1	X	q25	ENST00000371124 // Hs.680125 // ACTRT1 // 139741 // actin-related protein T1	-0.769878	-0.681911	-0.421995	0.089765	-0.86147	-0.403578	-0.36658	-0.126561	-0.104066	-0.168513	0.253312	-0.0290434	0.0971059	-0.024829	0.44605	-0.242584	0.195443	0.454688	0.120439	-0.0312344	-0.0437588	0.0293824	0.211229	-0.411874	0.431086	-0.0847637	-0.26742	-0.04434	0.0268505	0.16514	-0.0173227	-0.162589	0.104104	-0.625106	-0.00182456	-0.217767	0.198783	0.222926	-0.771823	-0.0315396	0.229806
ACTRT2	1	p36.32	ENST00000378404 // Hs.236635 // ACTRT2 // 140625 // actin-related protein T2	-0.287095	-0.295658	-0.171826	0.482767	-0.0780071	0.2729	-0.0458431	0.383806	0.375124	0.755848	0.0877969	0.0827779	0.337695	0.21939	0.502745	0.863889	0.283486	0.282884	0.494971	0.0871091	-0.022272	0.452543	0.0640776	0.232033	0.586232	0.417774	0.0833541	0.0412494	0.0843383	0.327764	0.0256295	-0.146206	0.42018	0.14442	0.157934	-0.167253	0.053148	0.373394	0.000391269	-0.00225302	0.0256352
ACTRT3	3	q26.2	ENST00000330368 // Hs.135411 // ACTRT3 // 84517 // actin-related protein T3	0.409562	0.121344	0.466633	0.468553	0.188441	0.470533	0.408806	0.556755	0.556669	0.35475	0.224756	0.595571	0.262887	0.568844	0.439814	0.33322	0.160769	0.555333	0.558709	0.0583416	0.131684	0.569374	0.228544	0.453911	0.409211	0.492442	0.302728	0.531093	0.574658	0.269481	0.448025	0.533362	0.558634	0.497465	0.558379	0.474446	0.203336	0.242051	0.140633	0.512456	0.507372
ACVR1	2	q24.1	ENST00000263640 // Hs.470316 // ACVR1 // 90 // activin A receptor, type I	-0.302132	-0.276891	-0.0173307	0.395271	-0.397999	0.00112811	-0.0266499	0.00862498	0.217953	-0.212132	-0.306086	0.0226981	0.0818804	0.33032	0.131389	-0.209712	0.0293745	0.114621	0.375017	-0.0356476	-0.030779	0.0699653	-0.284887	0.13266	0.111152	0.245298	-0.0796482	-0.0328408	-0.00295708	0.0323874	-0.0475857	0.0633576	0.382878	0.298952	0.336592	-0.0471244	-0.329481	0.0260526	-0.422382	-0.0373454	0.00168601
ACVR1B	12	q13.13	ENST00000257963 // Hs.438918 // ACVR1B // 91 // activin A receptor, type IB	0.053819	0.0299457	-0.165264	-0.479533	-0.00689293	-0.105944	-0.0478357	0.0567371	-0.0645273	0.154788	0.050166	0.0545105	-0.0676097	-0.315271	-0.242515	0.171358	-0.146318	-0.232788	-0.421676	0.0198517	-0.0392962	0.049083	0.0637494	-0.351114	-0.231309	-0.064247	-0.139747	-0.0149226	0.059897	-0.223073	-0.0152195	-0.107381	-0.427964	-0.185841	-0.277712	-0.119878	0.124107	-0.174985	0.0457746	-0.0354386	0.0444184
ACVR1C	2	q24.1	ENST00000243349 // Hs.562901 // ACVR1C // 130399 // activin A receptor, type IC	-0.289157	-0.257602	-0.0096013	0.385545	-0.362426	-0.0200968	-0.0512842	-0.00280091	0.235431	-0.169072	-0.35024	-0.0284913	0.14368	0.336674	0.112526	-0.190142	0.0576907	0.0685585	0.383683	-0.0394905	-0.0639844	0.0510943	-0.324538	0.136708	0.0980635	0.240379	-0.0869289	-0.0927682	-0.0398006	0.0410334	-0.0620565	0.0590922	0.389919	0.299573	0.347458	-0.0543773	-0.361871	0.0443574	-0.403248	-0.0727077	-0.0129398
ACVR2A	2	q22.3	ENST00000241416 // Hs.470174 // ACVR2A // 92 // activin A receptor, type IIA	-0.220552	-0.243364	0.0787859	0.120136	-0.32905	-0.0226452	-0.0105428	0.0512412	0.30825	-0.188984	-0.315177	0.0228342	0.113561	0.327213	0.105265	-0.193479	0.104541	0.121963	0.117008	0.0161373	-0.031609	0.128938	-0.279868	0.154818	0.106037	0.316466	-0.116682	-0.0258778	0.00499593	0.137866	-0.0565952	0.125011	0.147149	0.341254	0.377642	0.0312514	-0.310698	0.169852	-0.369259	-0.0246545	0.0142841
ACVR2B	3	p22.2	ENST00000352511 // Hs.174273 // ACVR2B // 93 // activin A receptor, type IIB	-0.280719	-0.241758	0.0315768	0.0734016	-0.324471	-0.0176923	-0.00545587	0.233547	-0.0698383	-0.143977	0.0475402	0.19312	0.154951	0.115184	0.210007	-0.214538	-0.253725	0.19291	0.0878266	0.0271687	-0.123151	0.201879	0.259069	0.180321	0.225585	-0.0680655	-0.0272449	-0.540768	0.246598	-0.216273	-0.51798	-0.171905	0.101479	-0.240858	0.117366	-0.197521	0.266171	-0.161841	-0.32099	-0.497791	0.253537
ACVRL1	12	q13.13	ENST00000551576 // Hs.591026 // ACVRL1 // 94 // activin A receptor type II-like 1	-0.208166	-0.123062	-0.306625	-0.514134	-0.33513	-0.306185	-0.197108	-0.06399	-0.361314	-0.0926755	-0.102838	-0.020021	-0.120165	-0.37901	-0.238143	-0.242669	-0.27295	-0.308169	-0.481117	-0.162585	-0.184119	-0.193037	-0.0543385	-0.315334	-0.269066	-0.176457	-0.31598	-0.324835	0.00077	-0.341662	-0.130184	-0.13426	-0.433982	-0.219497	-0.519173	-0.349965	-0.093126	-0.254184	-0.174604	-0.0915245	-0.0333505
ACY3	11	q13.2	ENST00000255082 // Hs.126265 // ACY3 // 91703 // aspartoacylase (aminocyclase) 3	-0.112072	-0.104662	0.224696	-0.0661309	-0.103199	0.0380778	-0.124446	-0.287708	-0.0190503	-0.0330369	0.0193112	-0.0424235	-0.0238231	0.201879	0.111662	-0.128627	0.168978	-0.0988556	-0.1051	0.008033	0.0307438	-0.255816	0.0100629	0.103228	-0.022569	-0.0780985	-0.00666675	0.166986	-0.100935	0.113184	0.0457459	0.225156	-0.0881761	0.0183059	0.183664	0.12364	0.0188133	0.115473	-0.0459323	0.0505291	-0.060878
ACYP1	14	q24.3	ENST00000238618 // Hs.18573 // ACYP1 // 97 // acylphosphatase 1, erythrocyte (common) type	-0.0573907	-0.0475375	0.382547	0.331081	-0.0117433	-0.0070103	0.0038841	-0.145873	0.271517	0.144837	-0.0289488	0.0386059	0.155827	0.103591	-0.248951	0.0808162	0.14751	-0.275251	0.311108	-0.0234531	-0.0861526	-0.0403257	0.0797183	0.0129585	-0.222243	0.257232	0.0118795	-0.123148	0.0509243	0.179953	0.0112955	0.619319	0.359088	-0.0810636	0.0756243	0.380435	-0.0106572	0.293725	0.0443209	0.0028519	0.057926
ACYP2	2	p16.2	ENST00000303536 // Hs.516173 // ACYP2 // 98 // acylphosphatase 2, muscle type	0.213814	0.212412	-0.11099	0.0522617	0.146397	-0.0197658	-0.026624	-0.207596	-0.102113	0.43501	0.229111	-0.0109722	0.0540715	0.0440785	0.117078	0.443927	0.0282098	0.0913821	0.0868	0.0398295	-0.0394904	-0.204899	0.22275	0.115626	0.108295	-0.117807	-0.0887043	-0.0583095	0.0152391	0.012609	-0.0341388	0.0990326	0.0935212	0.030942	0.0696235	0.0936196	0.261033	0.0253553	0.158728	-0.0449648	0.0199778
ADA	20	q13.12	ENST00000372874 // Hs.654536 // ADA // 100 // adenosine deaminase	-0.0606782	-0.0312941	-0.0270363	0.0180788	-0.0306981	-0.271479	-0.351042	-0.0554201	0.190052	-0.236441	0.257796	0.00148067	0.724507	0.807141	0.16089	-0.287866	0.0849787	0.104651	0.0546033	-0.0229597	0.17402	0.0472007	0.215509	0.747167	0.113235	0.191299	0.0327766	0.630238	-0.0325193	0.0855351	0.457224	0.288339	0.0124924	0.0822161	0.824255	0.0043666	0.120138	0.0751961	-0.0313958	0.383895	-0.0322872
ADAD1	4	q27	ENST00000296513 // Hs.518957 // ADAD1 // 132612 // adenosine deaminase domain containing 1 (testis-specific)	0.0460436	0.0526614	0.0857651	0.105354	0.0308339	-0.394324	-0.345218	-0.323868	-0.107067	-0.540741	-0.0272132	-0.0498494	-0.11801	-0.428932	-0.458541	-0.570724	-0.215538	-0.430215	0.0827956	-0.150791	-0.0460237	-0.388561	-0.0364027	-0.320227	-0.417901	-0.105491	-0.272327	-0.117842	-0.0906943	-0.303991	-0.109776	0.0682552	0.0740378	-0.195611	-0.382064	0.0356735	-0.0145884	-0.274284	0.0510194	-0.0966257	-0.0476318
ADAD2	16	q24.1	ENST00000315906 // Hs.8977 // ADAD2 // 161931 // adenosine deaminase domain containing 2	0.268408	0.212453	0.243931	0.45561	0.155751	-0.144572	-0.0634886	-0.362042	-0.0551235	-0.167121	-0.917997	-0.422818	-0.129616	-0.355138	-0.292657	-0.206664	-0.203068	-0.276765	0.469684	-0.0491657	-0.0430086	-0.31314	-0.799929	-0.345743	-0.303781	-0.10011	-0.09554	-0.0459599	-0.399046	-0.33372	0.0284937	0.17815	0.424456	-0.240055	-0.294472	0.155712	-0.928657	-0.220464	0.182941	-0.00292691	-0.341108
ADAL	15	q15.3	ENST00000389651 // Hs.533913 // ADAL // 161823 // adenosine deaminase-like	-0.275446	-0.310878	-0.287734	-0.467021	-0.29663	-0.414891	-0.322436	-0.0447955	-0.0755917	-0.258453	0.0149504	-0.207188	-0.333727	-0.440193	-0.380245	-0.32735	-0.215681	-0.384025	-0.46265	0.0836856	-0.00639359	0.141795	0.000592	-0.384156	-0.345603	-0.0615902	-0.291317	0.0864104	-0.188359	-0.24973	0.0632352	-0.639101	-0.41985	-0.0375111	-0.388811	-0.697879	-0.146349	-0.258884	-0.249184	0.0136344	0.115093
ADAM10	15	q21.3	ENST00000260408 // Hs.578508 // ADAM10 // 102 // ADAM metallopeptidase domain 10	-0.252607	-0.270145	0.309644	-0.426466	-0.340857	-0.398693	-0.325333	-0.0945061	0.22372	-0.214872	0.0195152	-0.225643	-0.366974	0.0262851	-0.426082	-0.268073	-0.229108	-0.443109	-0.380667	-0.00623354	-0.0233134	0.0257282	-0.0112951	0.12487	-0.357328	0.234567	-0.317121	-0.0295778	-0.220991	-0.287391	-0.0513217	0.307686	-0.338937	-0.115759	0.0224247	0.316191	-0.104087	-0.247711	-0.242626	-0.018687	-0.00310249
ADAM11	17	q21.31	ENST00000200557 // Hs.6088 // ADAM11 // 4185 // ADAM metallopeptidase domain 11	0.0780571	0.0711924	-0.0910748	-0.447381	0.0653717	0.144328	-0.0476368	0.328743	-0.0604039	-0.170908	-0.000875222	0.0302906	-0.401318	0.0456896	-0.284523	-0.0347941	0.0578283	-0.313749	-0.341305	0.0356137	-0.0449659	0.182868	0.125071	0.121004	-0.298104	-0.134332	0.0166337	-0.060189	0.0506169	0.0751452	-0.0147516	-0.139432	-0.361502	-0.0720551	0.106351	-0.193539	0.138359	0.030399	0.187205	-0.0394109	0.00929911
ADAM12	10	q26.2	ENST00000368676 // Hs.594537 // ADAM12 // 8038 // ADAM metallopeptidase domain 12	0.242794	0.222328	0.26407	0.0984404	-0.0290853	-0.31695	-0.33008	0.166632	-0.0230563	0.166775	-0.238999	-0.150274	0.101219	0.128789	0.114638	0.200854	-0.20258	0.352686	0.111259	0.0199028	0.00295208	0.175156	0.00522271	0.24185	0.159416	-0.0158469	-0.245119	0.0301985	-0.143464	-0.223947	0.0339357	0.328102	0.082696	0.0475351	0.0956945	0.326251	-0.0428079	-0.171544	-0.0889256	0.0281985	-0.110796
ADAM17	2	p25.1	ENST00000310823 // Hs.404914 // ADAM17 // 6868 // ADAM metallopeptidase domain 17	0.00304378	0.0169969	-0.0147904	-0.532685	-0.256783	-0.0519579	-0.029295	0.0666889	-0.129677	0.110573	0.211975	-0.00867488	0.091487	-0.0436672	0.159789	0.0629579	0.0343806	0.115242	-0.467187	-0.0023224	-0.0511681	0.00444476	0.195358	-0.41742	0.140551	-0.102236	-0.142207	-0.135153	0.0297468	0.0378292	-0.0874516	-0.195954	-0.465481	0.0393131	-0.166085	-0.340056	0.258648	-0.0071084	-0.240118	-0.0538599	0.0221097
ADAM18	8	p11.22	ENST00000265707 // Hs.127930 // ADAM18 // 8749 // ADAM metallopeptidase domain 18	0.205647	0.048035	0.231005	0.0380826	0.213696	-0.109468	-0.263148	0.123484	-0.608032	-0.592855	0.204148	-0.137011	-0.12025	-0.332341	0.372521	-0.673269	-0.0113525	0.39021	0.0641569	-0.0582667	-0.16636	0.141476	0.114382	-0.418143	0.341749	-0.599957	-0.0930538	-0.468944	-0.129321	-0.0835199	-0.576101	0.280306	0.0551008	-0.635933	-0.330937	0.253064	0.0433068	-0.000880614	0.166656	-0.552957	-0.106988
ADAM19	5	q33.3	ENST00000257527 // UTR-3 // 0 // Hs.483944 // ADAM19 // 8728 // ADAM metallopeptidase domain 19	-0.001457	0.00315398	-0.0414142	0.0417671	-0.019092	-0.0518825	-0.0668804	-0.0728657	0.224759	0.547835	0.456239	0.00937674	-0.0101914	0.0510693	0.113329	0.459839	-0.265333	0.0687223	0.0435286	-0.136418	0.0518901	-0.181733	0.311102	0.106755	0.10419	0.218045	-0.110195	0.261896	0.0241496	-0.330404	0.273663	0.0872053	0.0413195	0.119438	0.022881	0.058649	0.333194	-0.289099	0.00266354	0.229456	-0.0467126
ADAM2	8	p11.22	ENST00000265708 // Hs.177959 // ADAM2 // 2515 // ADAM metallopeptidase domain 2	0.24358	0.0579271	0.27119	0.0917564	0.266274	-0.0388999	-0.219577	0.165222	-0.610441	-0.567746	0.178598	0.15959	-0.105741	-0.320599	0.385498	-0.667775	0.0166003	0.391417	0.115937	-0.0140114	-0.169919	0.143472	0.0736216	-0.379861	0.367362	-0.630889	-0.0589811	-0.527159	0.155776	-0.102796	-0.598814	0.300145	0.0922596	-0.612862	-0.306662	0.256337	0.0241593	-0.0124912	0.24282	-0.546026	0.093759
ADAM20	14	q24.2	ENST00000256389 // Hs.177984 // ADAM20 // 8748 // ADAM metallopeptidase domain 20	-0.271656	-0.252744	0.186578	0.102155	-0.362645	-0.0499685	-0.0385498	-0.273961	0.287965	0.104425	-0.0624724	-0.0171454	-0.108466	0.0505736	-0.374202	0.0754235	-0.266429	-0.438863	0.0927972	-0.0431488	0.0268208	-0.180161	-0.0030115	0.0310289	-0.419484	0.295295	-0.00102183	-0.046834	-0.00897225	-0.311577	-0.0466942	0.343534	0.105747	0.0236382	0.0112667	0.221799	0.0607261	-0.37137	-0.310842	-0.0411477	-0.0979709
ADAM21	14	q24.2	ENST00000267499 // Hs.178748 // ADAM21 // 8747 // ADAM metallopeptidase domain 21	-0.438487	-0.372596	0.19546	0.119399	-0.292853	0.0569205	-0.06984	-0.039279	0.315779	-0.0079565	-0.036337	0.0924565	-0.164317	-0.067144	-0.532107	0.037522	-0.23876	-0.513586	0.053359	0.0531785	0.105544	-0.115179	-0.0690005	-0.0298705	-0.516558	0.269006	-0.050119	-0.194239	-0.0174045	-0.2478	-0.206157	0.266018	0.034704	0.018073	-0.0028715	0.211228	0.0162795	-0.290809	-0.361806	-0.157269	-0.147187
ADAM21P1	14	q24.2	ENST00000530196 // Hs.712468 // ADAM21P1 // 145241 // ADAM metallopeptidase domain 21 pseudogene 1	-0.324515	-0.265972	0.260209	0.141812	-0.278552	-0.0371719	0.0127337	-0.133059	0.372645	0.10748	0.093361	0.053205	-0.0634275	0.097219	-0.376213	0.0133713	-0.250031	-0.411187	0.114584	0.0345327	0.0292378	-0.0800065	0.0379963	0.0641483	-0.36228	0.405877	-0.014969	0.0118867	0.0594804	-0.254677	0.0189287	0.392192	0.177988	0.0709171	0.0629905	0.237999	0.0875854	-0.241826	-0.259203	-0.0635308	0.0719567
ADAM22	7	q21.12	ENST00000265727 // Hs.256398 // ADAM22 // 53616 // ADAM metallopeptidase domain 22	0.182303	-0.305639	0.305836	-0.417441	0.221242	0.192291	0.189302	0.0628669	-0.116761	0.364186	0.00397148	-0.0378677	0.0699766	0.0377483	-0.387132	0.404606	0.234674	-0.395277	-0.381105	0.0133224	-0.00213826	0.160852	-0.0258963	0.103582	-0.37028	-0.102552	0.0992544	-0.0663114	-0.0346916	0.212829	-0.0643829	0.307448	-0.363144	0.0306682	0.0653071	0.3004	-0.0373169	0.145964	0.256825	-0.0529266	-0.00236197
ADAM23	2	q33.3	ENST00000264377 // Hs.591643 // ADAM23 // 8745 // ADAM metallopeptidase domain 23	0.412425	0.391025	0.0980376	-0.441195	0.482808	0.183597	0.194819	-0.578391	0.230459	0.23696	-0.311973	0.0136802	0.157175	0.0283647	-0.421799	0.0705213	-0.184529	-0.437638	-0.395163	-0.0527798	0.00675693	-0.410756	-0.270405	-0.416702	-0.388841	0.250334	0.096856	-0.00207746	0.00789032	-0.262404	-0.00865099	0.12104	-0.370105	0.300162	0.0402429	0.0870796	-0.308188	-0.206604	0.391501	-0.0132464	0.0329204
ADAM28	8	p21.2	ENST00000265769 // Hs.174030 // ADAM28 // 10863 // ADAM metallopeptidase domain 28	-0.786296	-0.733233	-0.259259	-0.398559	-0.79633	-0.338322	-0.823565	-0.44948	0.069112	-0.564337	0.0254147	-1.15379	-0.0877384	-0.266419	-0.355263	-0.642949	0.101896	-0.383724	-0.362763	-0.134179	-0.138534	-0.44411	0.106851	-0.345058	-0.363273	0.0927919	-0.174569	-0.465123	-1.12328	0.032018	-0.5814	-0.219091	-0.372196	-0.0899239	-0.277493	-0.193872	0.0334764	0.0983767	-0.755047	-0.536281	-0.780342
ADAM29	4	q34.1	ENST00000359240 // Hs.126838 // ADAM29 // 11086 // ADAM metallopeptidase domain 29	-0.279821	-0.27416	0.064469	-0.471404	-0.283293	-0.413728	-0.394222	-0.39629	-0.0803949	-0.600695	0.0317966	-0.0498734	-0.179763	-0.447662	-0.513675	-0.60756	-0.195948	-0.493807	-0.410186	-0.132178	-0.100249	-0.388077	0.010369	-0.387905	-0.473478	-0.116209	-0.276339	-0.609662	-0.0338248	-0.262196	-0.574414	0.0598328	-0.399788	-0.241192	-0.407789	0.0799959	0.0130795	-0.24816	-0.261281	-0.537451	-0.0930967
ADAM30	1	p12	ENST00000369400 // Hs.283011 // ADAM30 // 11085 // ADAM metallopeptidase domain 30	-0.304149	-0.280438	0.102658	0.143099	-0.203341	0.031393	-0.0251784	0.207416	0.264268	0.0597358	0.0437831	0.030008	-0.131272	0.0962973	0.250325	0.135245	0.0765804	0.190684	0.187565	-0.0260481	0.160785	0.209314	0.0228742	0.125138	0.197879	0.372872	0.0237519	0.321929	-0.0107408	0.117841	0.317692	0.236997	0.0879713	0.238565	0.062177	0.189951	0.0530594	0.179636	-0.0566407	0.32382	-0.0979254
ADAM32	8	p11.22	ENST00000379907 // Hs.521545 // ADAM32 // 203102 // ADAM metallopeptidase domain 32	0.243336	0.0575042	0.288603	0.0829291	0.223969	-0.0758015	-0.213645	0.0302965	-0.558753	-0.586267	0.184552	-0.25301	-0.124432	-0.325671	0.430974	-0.656195	-0.0666435	0.423006	0.0971467	-0.0738244	-0.173632	0.0143436	0.0985433	-0.376618	0.410279	-0.542386	-0.0422002	-0.453672	-0.217133	-0.189912	-0.537701	0.276181	0.0683199	-0.551942	-0.323943	0.238372	0.0300265	-0.115919	0.218768	-0.497134	-0.119249
ADAM33	20	p13	ENST00000350009 // Hs.173716 // ADAM33 // 80332 // ADAM metallopeptidase domain 33	0.346218	0.22862	-0.205965	-0.554975	0.222774	-0.324937	-0.088584	0.375619	0.352473	0.055073	0.110471	-0.0763812	0.330235	-0.0770162	-0.417639	0.184358	-0.0640754	-0.401073	-0.635277	-0.0197602	0.137065	0.350891	0.208016	0.030742	-0.377956	0.468032	-0.149168	0.166002	0.0162628	-0.0096124	-0.120025	0.0582544	-0.580478	0.272692	-0.0987848	-0.370785	0.134008	-0.015294	0.232392	-0.17715	-0.0341516
ADAM3A	8	p11.22	ENST00000424066 // Hs.98848 // ADAM3A // 1587 // ADAM metallopeptidase domain 3A (pseudogene)	-1.32912	-1.333	0.0732172	-1.27782	-1.30876	-1.38631	-1.42737	-0.0913271	-1.37418	-0.509466	-0.407457	-1.65816	0.0985464	-0.154833	0.425381	-0.63281	0.107019	0.376723	-1.09751	-0.246916	-0.575493	-0.0291933	-0.360658	-0.23645	0.426655	-1.37464	-1.50255	-1.47596	-1.5855	0.0361911	-1.32596	0.107812	-1.19517	-1.42902	-0.315546	0.0489681	-0.602183	0.214008	-1.19415	-1.32448	-1.52353
ADAM7	8	p21.2	ENST00000175238 // Hs.116147 // ADAM7 // 8756 // ADAM metallopeptidase domain 7	-0.769004	-0.771287	-0.242269	-0.403137	-0.818886	-0.357589	-0.841027	-0.369022	-0.590869	-0.628985	-0.0228888	-1.14487	-0.112795	-0.31225	-0.330807	-0.710816	0.00841408	-0.395111	-0.403575	-0.140354	-0.190552	-0.426267	0.0709531	-0.393759	-0.38405	-0.624202	-0.22279	-0.512373	-1.08188	-0.0600693	-0.552915	-0.23205	-0.388711	-0.603646	-0.332535	-0.230765	0.0145986	0.0422177	-0.750723	-0.580122	-0.793418
ADAM8	10	q26.3	ENST00000415217 // Hs.501574 // ADAM8 // 101 // ADAM metallopeptidase domain 8	0.2247	0.282422	0.305376	-0.32439	0.0736974	-0.324844	-0.324064	0.168573	0.0642014	0.266865	0.0461783	-0.0908889	0.227299	0.704899	0.158679	0.195882	-0.14017	0.455595	-0.286803	0.0324305	-0.0754617	0.180478	-0.0037044	0.765116	0.303611	-0.0305555	-0.0205634	0.0037778	-0.0211927	-0.181015	0.015125	0.418396	-0.289264	0.0593305	0.632323	0.401846	0.0005109	-0.0588726	-0.108477	-0.0732393	0.0212652
ADAM9	8	p11.22	ENST00000379917 // Hs.591852 // ADAM9 // 8754 // ADAM metallopeptidase domain 9	0.241245	0.0266205	0.272776	0.12888	0.288847	-0.0390179	-0.15615	-0.349037	-0.612019	-0.622326	0.228701	0.140423	-0.103925	-0.350182	0.441138	-0.689141	-0.208458	0.464645	0.138061	-0.0961463	-0.180784	-0.391474	0.100867	-0.380095	0.412205	-0.563634	-0.0456121	-0.462236	0.199452	-0.382412	-0.498291	0.307442	0.112349	-0.632364	-0.314243	0.30637	0.0667399	-0.251522	0.261413	-0.462741	0.252078
ADAMDEC1	8	p21.2	ENST00000256412 // Hs.521459 // ADAMDEC1 // 27299 // ADAM-like, decysin 1	-0.841919	-0.716452	-0.276134	-0.477019	-0.868655	-0.334604	-0.882083	-0.491908	-0.731479	-0.612372	0.0486974	-1.23637	-0.0787572	-0.378364	-0.445362	-0.753969	0.0931696	-0.561558	-0.471214	-0.169433	-0.205587	-0.433707	0.152755	-0.383831	-0.46848	-0.677221	-0.176269	-0.589109	-1.19086	0.0744207	-0.663486	-0.249041	-0.489599	-0.622429	-0.364388	-0.304671	0.0451994	0.137262	-0.819194	-0.665299	-0.863473
ADAMTS1	21	q21.3	ENST00000284984 // Hs.643357 // ADAMTS1 // 9510 // ADAM metallopeptidase with thrombospondin type 1 motif, 1	0.0527154	0.0490452	-0.184452	0.365456	-0.0391862	0.036434	0.017486	0.233414	0.0229377	-0.158397	-0.291974	-0.219963	0.37205	0.12081	0.189062	-0.161004	-0.166395	0.136606	0.389215	0.00696109	-0.0529162	0.204002	-0.0668807	0.175195	0.168848	0.0230371	-0.0843832	-0.0285965	-0.22275	-0.264253	0.0117728	-0.170987	0.343645	0.00745638	0.101672	-0.184966	0.0407284	-0.184653	0.00845856	-0.00765491	-0.29796
ADAMTS10	19	p13.2	ENST00000270328 // Hs.657508 // ADAMTS10 // 81794 // ADAM metallopeptidase with thrombospondin type 1 motif, 10	-0.200002	-0.203166	-0.190342	0.0919432	-0.294276	0.130506	0.195784	-0.272712	0.626573	-0.126206	0.133724	-0.363768	-0.0802387	-0.42418	0.137239	-0.176816	0.354523	0.183722	0.0415681	-0.0155983	0.194934	-0.279737	0.105513	-0.363006	0.195829	0.631996	0.0672618	0.494645	-0.372153	0.306071	0.500184	-0.127683	0.0733704	0.557324	-0.3228	-0.189126	0.0481436	0.272596	-0.243767	0.484924	-0.289969
ADAMTS12	5	p13.3	ENST00000352040 // Hs.12680 // ADAMTS12 // 81792 // ADAM metallopeptidase with thrombospondin type 1 motif, 12	0.039704	0.0206202	0.607988	0.122629	-0.0226912	0.189756	-0.00986636	-0.26718	0.670253	0.12398	0.434295	0.236013	-0.108154	0.100312	0.064041	0.114467	0.53424	0.0626987	0.119479	-0.00693192	0.0897263	-0.163363	0.31055	0.158693	0.100276	0.659936	0.0625704	0.491922	0.133456	0.538791	0.477177	0.693467	0.108754	0.352047	0.0489663	0.682387	0.323433	0.595133	-0.0121054	0.43024	-0.0407605
ADAMTS13	9	q34.2	ENST00000338351 // Hs.131433 // ADAMTS13 // 11093 // ADAM metallopeptidase with thrombospondin type 1 motif, 13	-0.265908	-0.300424	0.342661	-0.358791	-0.339327	0.117211	0.17176	0.334995	-0.132575	-0.199956	0.616796	0.25025	0.182257	0.450151	0.204484	-0.137849	0.346661	0.259669	-0.347251	0.032636	0.0582682	0.321746	0.233275	0.392939	0.196268	-0.0563477	0.0965084	0.0589025	0.191486	0.338807	0.0093158	0.341909	-0.352924	-0.169425	0.434704	0.260227	0.294543	0.325616	-0.384128	0.043695	0.180735
ADAMTS14	10	q22.1	ENST00000373207 // Hs.352156 // ADAMTS14 // 140766 // ADAM metallopeptidase with thrombospondin type 1 motif, 14	0.260737	0.220057	0.0832682	0.133584	0.211334	0.127035	0.20732	0.211611	-0.0346355	-0.145195	0.31437	-0.150092	0.11405	0.160989	-0.339453	-0.134172	-0.157095	0.199462	0.156913	0.0694599	-0.0347472	0.269983	0.231267	0.251119	-0.261823	-0.0003702	0.0119589	0.0522012	-0.123458	-0.175399	0.0748318	0.0349315	0.000300788	0.0817551	0.185008	0.139271	0.173317	-0.137867	0.124617	-0.00353991	-0.10149
ADAMTS15	11	q24.3	ENST00000299164 // Hs.534221 // ADAMTS15 // 170689 // ADAM metallopeptidase with thrombospondin type 1 motif, 15	-0.196662	-0.196501	-0.00121164	0.0729205	0.0108736	0.220758	0.0239586	-0.0750798	0.0672706	0.389175	0.030874	-0.159657	-0.0387388	0.229494	0.708993	0.316368	0.0556113	0.524035	0.118263	-0.056022	0.0797023	-0.158469	-0.00918003	0.160464	0.59967	0.0344222	0.0481198	0.340756	-0.171094	0.0772995	0.327819	-0.144556	0.0966993	0.0604547	0.142056	-0.19953	0.0177955	0.0953978	-0.0333347	0.320052	-0.141641
ADAMTS16	5	p15.32	ENST00000274181 // Hs.661915 // ADAMTS16 // 170690 // ADAM metallopeptidase with thrombospondin type 1 motif, 16	0.0712457	0.0650974	0.315304	0.110731	0.0359499	0.205354	0.00682103	0.395571	0.719659	0.153497	0.504394	0.217763	0.0959188	0.438025	0.386844	0.186225	0.535135	0.384522	0.127885	0.146157	0.489145	0.441729	0.286664	0.460216	0.408221	0.707093	0.119196	1.15529	0.115952	0.555298	1.10252	0.389573	0.0992373	0.350781	0.40284	0.436762	0.307021	0.618143	0.0291352	1.00504	-0.0312256
ADAMTS17	15	q26.3	ENST00000268070 // Hs.513200 // ADAMTS17 // 170691 // ADAM metallopeptidase with thrombospondin type 1 motif, 17	0.00591665	0.0118466	-0.265715	0.586181	-0.0517662	-0.414128	-0.394272	-0.103494	-0.00485404	-0.201727	-0.34145	0.347081	-0.385391	0.151984	0.08134	-0.178775	0.059643	0.105397	0.629144	-0.0109135	0.020709	0.109094	-0.356244	0.166311	0.142289	-0.0170094	-0.196323	0.30663	0.352289	0.102063	0.293205	-0.193299	0.534441	-0.100502	0.085734	-0.208559	-0.388908	0.124767	0.0528008	0.255254	0.424429
ADAMTS18	16	q23.1	ENST00000282849 // Hs.188746 // ADAMTS18 // 170692 // ADAM metallopeptidase with thrombospondin type 1 motif, 18	0.292943	0.276308	0.218125	0.125536	0.274215	-0.0491736	-0.0200979	-0.387676	-0.100887	-0.153601	-0.822714	-0.546718	-0.132252	-0.462955	-0.462427	-0.145013	-0.210598	-0.468045	0.129943	-0.0958827	-0.0113475	-0.40664	-0.730735	-0.372956	-0.455562	-0.0896262	-0.0490277	-0.0345799	-0.557381	-0.285914	-0.0129441	0.152864	0.0893493	-0.212983	-0.394386	0.140897	-0.849647	-0.246436	0.246444	-0.0253927	-0.437046
ADAMTS19	5	q23.3	ENST00000274487 // Hs.23751 // ADAMTS19 // 171019 // ADAM metallopeptidase with thrombospondin type 1 motif, 19	-0.375302	-0.361298	0.0153727	-0.48696	-0.400465	0.24529	0.384818	0.0128056	0.139079	0.0620377	0.431424	-0.0221472	-0.123483	-0.442971	0.0571843	-0.035233	-0.193862	0.0781324	-0.425671	-0.101067	0.0949002	-0.15215	0.32001	-0.421748	0.0761741	0.134017	0.183306	0.26831	-0.0334918	-0.261839	0.236613	0.0587212	-0.424284	0.13996	-0.389229	0.0433096	0.297744	-0.230945	-0.387302	0.231768	-0.0471302
ADAMTS2	5	q35.3	ENST00000251582 // Hs.23871 // ADAMTS2 // 9509 // ADAM metallopeptidase with thrombospondin type 1 motif, 2	0.249413	0.228175	0.522505	0.351782	0.216457	-0.0881044	-0.075576	-0.0179132	0.238658	0.515699	0.493517	0.133362	0.107956	0.126372	0.167277	0.511754	-0.180888	0.276267	0.378932	-0.0788622	0.0813296	-0.100442	0.383885	0.156079	0.190095	0.234881	-0.137027	0.328673	0.0738431	-0.219003	0.311045	0.515585	0.281684	0.203875	0.0839831	0.543027	0.385551	-0.182012	0.200564	0.273691	0.049007
ADAMTS20	12	q12	ENST00000389420 // Hs.287554 // ADAMTS20 // 80070 // ADAM metallopeptidase with thrombospondin type 1 motif, 20	0.0113445	0.0233476	-0.20457	-0.464095	-0.0189234	0.350555	0.379199	0.0458908	-0.0861278	0.480369	-0.299611	0.00342427	-0.101005	0.0802416	-0.367015	0.479102	-0.149986	-0.365672	-0.415837	0.00305724	-0.0533123	0.000410698	-0.223686	0.124948	-0.381012	-0.0813479	0.178443	-0.0748925	-0.033966	-0.231062	-0.0555044	-0.186249	-0.400541	-0.239132	0.0623925	-0.204575	-0.171405	-0.195142	0.0243008	-0.0553279	-0.0220378
ADAMTS3	4	q13.3	ENST00000286657 // Hs.590919 // ADAMTS3 // 9508 // ADAM metallopeptidase with thrombospondin type 1 motif, 3	0.0374964	0.048892	-0.259335	-0.486517	0.0220051	-0.412374	-0.367005	0.180288	-0.103293	-0.173359	-0.0130614	-0.0589214	-0.172592	0.05286	0.0955811	-0.211168	-0.206554	0.0635447	-0.430809	-0.0271245	-0.0545426	0.157594	-0.0358362	0.113869	0.0832873	-0.0929223	-0.295157	-0.0893835	-0.0642208	-0.253112	-0.0932118	-0.23607	-0.412749	-0.227679	0.0509409	-0.25131	-0.0136622	-0.236212	0.0251617	-0.0626208	-0.112059
ADAMTS4	1	q23.3	ENST00000367996 // Hs.211604 // ADAMTS4 // 9507 // ADAM metallopeptidase with thrombospondin type 1 motif, 4	0.337221	0.465948	0.160109	-0.006952	0.241187	-0.0214394	0.0587608	0.259178	0.240005	0.190663	0.14913	0.076475	0.494827	0.0932542	0.21571	0.103811	0.114098	0.215367	0.0677139	0.0624359	0.204296	0.178563	-0.0127852	0.17862	0.17079	0.221582	-0.0791424	0.571505	0.0723361	0.0117394	0.56141	0.0434951	-0.0209669	0.141962	0.0905781	0.131258	0.060642	0.0287742	0.274839	0.4364	0.0821062
ADAMTS5	21	q21.3	ENST00000284987 // Hs.58324 // ADAMTS5 // 11096 // ADAM metallopeptidase with thrombospondin type 1 motif, 5	0.0952969	0.0812274	-0.231505	0.434754	0.0166317	0.0242515	0.0385882	0.239291	-0.0227125	-0.14135	-0.322817	-0.224744	0.351214	0.161492	0.176975	-0.167924	-0.191786	0.128704	0.402305	0.033626	-0.0412132	0.161442	-0.0513643	0.214603	0.133981	0.00961908	-0.0789631	-0.0498071	-0.208369	-0.242151	-0.0591457	-0.202091	0.395298	-0.0287912	0.16215	-0.22549	-0.0737017	-0.210003	0.0422047	-0.0516018	-0.297557
ADAMTS6	5	q12.3	ENST00000261306 // Hs.482291 // ADAMTS6 // 11174 // ADAM metallopeptidase with thrombospondin type 1 motif, 6	0.0393313	0.0316691	-0.243243	-0.470754	-0.0513566	-0.0727702	-0.374705	-0.278225	-0.6729	-0.632049	0.351574	-0.0353706	-0.152301	-0.44326	-0.418845	-0.711171	-0.218819	-0.455234	-0.437369	-0.119445	-0.0770803	-0.332441	0.293904	-0.391391	-0.429366	-0.662112	-0.120969	-0.122574	-0.0503438	-0.288016	-0.112692	-0.25953	-0.413675	-0.425474	-0.40475	-0.267357	0.269053	-0.258488	-0.0435036	-0.104595	-0.111688
ADAMTS7	15	q25.1	ENST00000388820 // Hs.16441 // ADAMTS7 // 11173 // ADAM metallopeptidase with thrombospondin type 1 motif, 7	0.039695	-0.0270957	-0.169172	0.549664	0.00422159	-0.356422	-0.295576	-0.5729	0.0711767	-0.199674	0.0517595	0.0601411	-0.293963	-0.331071	-0.253793	-0.177837	0.105887	-0.280357	0.479741	0.00590275	0.017094	-0.266397	0.00909553	-0.329876	-0.237909	0.0329706	-0.228836	0.43502	0.0820127	0.0306099	0.469134	-0.137392	0.4649	-0.12724	-0.328309	-0.169224	-0.0776903	0.110328	0.0790646	0.396435	0.233517
ADAMTS8	11	q24.3	ENST00000257359 // Hs.271605 // ADAMTS8 // 11095 // ADAM metallopeptidase with thrombospondin type 1 motif, 8	-0.258677	-0.243988	-0.0164265	0.026407	0.0485742	0.171664	0.0191197	-0.147622	0.0470166	0.396998	0.0142722	-0.181893	-0.159773	0.21298	0.732954	0.323677	0.113365	0.548245	0.0785858	-0.110841	0.0734824	-0.218557	-0.0259036	0.193874	0.576921	0.0249636	0.0594271	0.33269	-0.207095	0.122861	0.328855	-0.192715	0.0851974	0.0404048	0.195469	-0.236338	0.0201417	0.0971438	-0.0296514	0.315943	-0.170948
ADAMTS9	3	p14.1	ENST00000295903 // Hs.656071 // ADAMTS9 // 56999 // ADAM metallopeptidase with thrombospondin type 1 motif, 9	0.0748354	0.0691456	0.300024	-0.168337	0.0565765	0.0501475	0.0694605	0.199037	-0.00888811	-0.124553	0.054391	-0.19719	0.196912	0.132383	0.156529	-0.140974	-0.174447	0.115763	0.0338839	0.0180507	-0.0166952	0.198507	0.205211	0.195422	0.162742	0.0119714	-0.0277608	0.0194699	-0.156192	-0.233257	0.00942314	0.340333	0.122603	-0.180709	0.117991	0.260869	0.139034	-0.188364	0.0978105	-0.00896438	-0.086722
ADAMTSL1	9	p22.2	ENST00000276935 // Hs.522019 // ADAMTSL1 // 92949 // ADAMTS-like 1	-0.237571	-0.232965	-0.237557	0.105654	-0.353267	-0.0177941	0.18882	-0.0153454	-0.0851873	-0.659349	0.408033	-0.261762	-0.0838924	-0.00626212	0.438698	-0.680317	0.248555	0.378646	0.101689	-0.00283668	-0.044883	0.0495459	0.215501	0.00461137	0.409726	-0.0895187	0.0401281	-0.559447	-0.238767	0.3109	-0.540803	-0.196282	0.0729174	-0.239765	0.0322669	-0.209095	0.138451	0.293008	-0.389225	-0.506963	-0.0688869
ADAMTSL2	9	q34.2	ENST00000354484 // Hs.522543 // ADAMTSL2 // 9719 // ADAMTS-like 2	-0.171073	-0.166993	0.348197	-0.350286	-0.314777	0.227652	0.298612	0.37062	0.00434254	-0.110689	0.595373	0.294639	0.262976	0.506077	0.30205	-0.00800436	0.404799	0.29175	-0.320527	0.0709124	0.0234337	0.407793	0.391407	0.569508	0.348416	-0.0453627	0.126153	0.130368	0.275248	0.455262	0.0810233	0.405498	-0.417967	-0.260303	0.518103	0.2925	0.222796	0.469674	-0.220268	-0.0530789	0.20166
ADAMTSL3	15	q25.2	ENST00000286744 // Hs.459162 // ADAMTSL3 // 57188 // ADAMTS-like 3	0.0123725	-0.0024288	-0.224447	0.632667	0.0319129	-0.357594	-0.339945	-0.091924	0.0184535	-0.183502	-0.3028	0.0286241	-0.382603	0.0748201	0.0948264	-0.202715	0.0375774	0.0715896	0.583461	-0.012812	0.153413	0.0721678	-0.299889	0.152598	0.0623095	-0.0102036	-0.253964	0.496883	0.0342364	0.0568174	0.466952	-0.217265	0.565717	-0.0800706	0.0793543	-0.197241	-0.322273	0.0516523	0.114404	0.437987	0.195566
ADAMTSL4	1	q21.3	ENST00000271643 // Hs.516243 // ADAMTSL4 // 54507 // ADAMTS-like 4	0.235566	0.210624	0.146311	0.365899	0.178256	-0.160383	-0.117572	0.169395	0.17029	0.327759	-0.0200473	-0.113032	0.408836	0.0731693	0.187861	0.20297	-0.011236	0.194645	0.280323	-0.0399137	0.0353293	0.103931	-0.042596	0.0602603	0.178646	0.166335	-0.0844847	0.335017	-0.0460423	-0.0574307	0.532051	0.160679	0.289222	-0.024409	-0.00686467	0.169921	-0.0438113	-0.0370927	0.163421	0.394177	-0.071462
ADAMTSL5	19	p13.3	ENST00000330475 // UTR-3 // 0 // Hs.371674 // ADAMTSL5 // 339366 // ADAMTS-like 5	-0.244348	-0.253718	-0.11487	-0.315652	-0.128231	-0.205053	-0.259249	-0.0521812	0.0662828	-0.100584	0.155311	0.0149478	-0.140683	-0.157468	-0.16772	-0.169777	-0.0853112	-0.294875	-0.388495	0.0608923	-0.098372	0.009846	0.097838	-0.200167	-0.0990313	-0.0230815	-0.18437	-0.253381	-0.053857	-0.267553	-0.316457	-0.031635	-0.271608	-0.120726	-0.166618	-0.122246	-0.0249985	-0.17523	-0.222694	-0.263343	0.0610278
ADAP1	7	p22.3	ENST00000265846 // Hs.602573 // ADAP1 // 11033 // ArfGAP with dual PH domains 1	-0.241468	-0.073928	0.178529	0.3485	-0.31887	-0.298168	-0.266847	-0.0273914	-0.0200915	0.195752	0.134201	0.181025	0.179763	-0.234454	-0.0946502	0.147783	0.0313485	-0.0638034	0.336001	0.155679	0.305479	0.137103	0.110142	-0.183786	-0.131529	-0.00152825	-0.115577	0.6701	0.17631	-0.00507619	0.622475	0.466595	0.38923	0.072161	-0.153414	0.327404	0.130726	0.0411158	-0.180267	0.537834	0.243953
ADAP2	17	q11.2	ENST00000330889 // Hs.514063 // ADAP2 // 55803 // ArfGAP with dual PH domains 2	-0.291425	-0.245268	-0.25965	-0.475408	-0.302943	-0.395663	-0.294951	-0.715638	-0.204703	-0.218703	-0.0112823	-0.51799	-0.116498	-0.520983	-0.390268	-0.246676	-0.253441	-0.378997	-0.445884	-0.142619	-0.0299943	-0.784974	0.00397183	-0.472868	-0.37057	-0.166844	-0.319994	-0.102432	-0.536895	-0.336859	-0.0528492	-0.255121	-0.442333	-0.14242	-0.431739	-0.248171	-0.0286093	-0.35723	-0.270011	-0.0416585	-0.430687
ADAR	1	q21.3	ENST00000471068 // Hs.12341 // ADAR // 103 // adenosine deaminase, RNA-specific	0.219671	0.195157	0.164586	0.0326181	0.140891	-0.0226432	-0.0684394	0.19602	0.286274	0.391435	0.0483103	0.0269317	0.387784	0.0653999	0.173384	0.385546	0.0752215	0.176785	0.0780912	0.0519013	0.153791	0.183873	0.0239025	0.107535	0.173979	0.266133	-0.0786719	0.549722	0.0413398	0.0804294	0.509849	0.115234	0.0894389	0.0365586	0.0726306	0.204607	-0.00181071	0.094104	0.141647	0.510246	0.049875
ADARB1	21	q22.3	ENST00000348831 // Hs.474018 // ADARB1 // 104 // adenosine deaminase, RNA-specific, B1	0.0793819	0.0680478	0.617888	0.113001	-0.0240635	0.187016	0.401257	-0.29519	-0.00844629	-0.124365	-0.22741	-0.0927276	0.343304	-0.30371	0.239338	-0.116532	-0.154455	0.154681	0.11237	-0.0554761	0.0300171	-0.271232	0.0446698	-0.336313	0.274144	0.0241435	0.219407	0.214473	-0.0848999	-0.226578	0.131012	0.711395	0.0493286	0.000205763	-0.320415	0.752729	0.0286173	-0.0777518	-0.0223122	0.124846	-0.206166
ADARB2	10	p15.3	ENST00000381312 // Hs.586663 // ADARB2 // 105 // adenosine deaminase, RNA-specific, B2	0.0497845	0.0436463	0.678958	-0.395199	-0.0197252	0.183906	0.3585	0.185681	-0.0362269	-0.170711	0.0612564	-0.181919	0.394562	-0.253072	0.465051	-0.147162	-0.187111	0.326615	-0.395181	0.0502353	-0.0588519	0.235322	0.206668	-0.18802	0.47648	-0.0540327	0.202587	0.00713179	-0.159373	-0.265811	0.0108208	0.55942	-0.429809	-0.0391625	-0.340719	0.700157	0.143553	-0.174059	-0.0918565	-0.0110282	0.00845309
ADAT1	16	q23.1	ENST00000307921 // Hs.729312 // ADAT1 // 23536 // adenosine deaminase, tRNA-specific 1	0.325016	0.308661	0.212989	0.0390341	0.33585	-0.0380924	0.000123417	-0.307324	-0.149823	-0.110248	-0.870586	-0.475005	-0.0363762	-0.43848	-0.324276	-0.180681	-0.174751	-0.402686	0.0583175	-0.0373965	-0.0224998	-0.320695	-0.706649	-0.321645	-0.365902	-0.075683	-0.0410638	-0.0911011	-0.490465	-0.291965	-0.0464645	0.198731	0.0519527	-0.21871	-0.35284	0.185776	-0.779482	-0.31099	0.314328	0.0138527	-0.382123
ADAT2	6	q24.2	ENST00000237283 // Hs.709561 // ADAT2 // 134637 // adenosine deaminase, tRNA-specific 2	-0.195947	-0.207417	-0.197063	-0.416355	-0.105059	0.0197819	0.197983	0.0547105	-0.0479074	0.0264589	-0.266794	-0.589687	-0.0989528	0.0831271	-0.355193	-0.17054	0.712845	-0.363046	-0.386716	0.0117158	0.0579989	0.130988	-0.279015	0.121325	-0.307298	-0.0641425	0.0388462	0.290218	-0.544786	0.715708	0.263669	-0.175548	-0.352553	-0.161839	0.0617759	-0.207628	-0.284446	0.717221	-0.0606114	0.234427	-0.447196
ADCK1	14	q24.3	ENST00000238561 // Hs.413208 // ADCK1 // 57143 // aarF domain containing kinase 1	0.00361026	0.0046659	0.45874	0.0519583	0.000505261	-0.320099	-0.307765	-0.160674	0.354063	0.0639547	0.00233131	0.024524	0.254148	0.0449337	-0.379892	-0.00988745	0.253017	-0.332696	0.0649767	0.0141859	-0.00814299	-0.0159125	-0.0344762	0.00977423	-0.309859	0.359636	-0.244748	-0.0762282	0.0416307	0.257772	-0.0441034	0.617669	0.043007	0.0290362	0.0796039	0.493827	0.0177309	0.214529	-0.0494174	-0.0161309	0.00634784
ADCK2	7	q34	ENST00000072869 // Hs.534141 // ADCK2 // 90956 // aarF domain containing kinase 2	0.190134	-0.339717	0.156257	0.0303452	0.254447	0.0940459	0.357821	0.0352667	-0.161812	0.286185	0.0178067	-0.0193677	0.0720616	0.423872	0.481632	0.293937	0.133799	0.487383	0.0162762	-0.0429351	-0.0610983	0.127606	-0.0750484	0.455729	0.399095	-0.167019	0.0572977	-0.0409267	-0.0528814	-0.0411955	-0.0828332	0.119467	0.0288653	-0.0376026	0.405751	0.0786753	-0.0389532	-0.0835176	0.335499	-0.0507529	-0.00607089
ADCK3	1	q42.13	ENST00000366779 // Hs.118241 // ADCK3 // 56997 // aarF domain containing kinase 3	0.365586	0.32206	0.0681297	-0.385343	0.404301	-0.0113605	0.027082	-0.291436	-0.00144453	-0.130299	0.0414651	0.0197893	0.125581	-0.423581	-0.372399	-0.140993	0.065734	-0.379472	-0.359125	-0.0756702	-0.0593406	-0.293295	0.166241	-0.320471	-0.344355	-0.0263309	-0.0533864	-0.0235866	0.0461064	0.0183064	0.00366526	0.29283	-0.37375	0.017118	-0.360732	0.232327	0.0693168	0.0203123	0.373856	-0.0396409	-0.0015874
ADCK4	19	q13.2	ENST00000243583 // Hs.130712 // ADCK4 // 79934 // aarF domain containing kinase 4	0.176039	0.162176	-0.142714	0.113459	0.176709	0.0385507	0.117392	0.178278	0.174465	0.0423391	-0.229763	0.0293109	0.0857535	0.0588598	0.210997	0.0423977	0.344402	-0.3089	0.0713279	0.0135966	-0.0313743	0.165776	0.0963683	0.0765316	-0.0723379	0.174397	-0.00567426	-0.0633177	0.0797206	0.453973	-0.0839484	0.0562973	0.0498412	0.0673251	0.0622507	0.000696565	0.0179672	0.370394	0.124566	-0.0883109	-0.0908987
ADCK5	8	q24.3	ENST00000308860 // Hs.283374 // ADCK5 // 203054 // aarF domain containing kinase 5	0.203569	-0.045575	0.613986	0.616247	0.306366	0.0721987	0.298304	0.512498	0.444797	-0.2495	0.762091	0.326727	0.138688	0.6926	0.562299	-0.221449	0.223003	0.439226	0.555458	0.15093	0.313124	0.526852	0.84768	0.624052	0.603244	0.436847	0.14831	0.786007	0.361162	0.2304	0.699254	0.570147	0.584582	0.0550878	0.711704	0.54324	0.86827	0.0863639	0.187908	0.68492	0.245606
ADCY1	7	p12.3	ENST00000432715 // Hs.192215 // ADCY1 // 107 // adenylate cyclase 1 (brain)	-0.280596	-0.267718	-0.177543	-0.473554	-0.295901	0.19639	0.21326	0.0799226	-0.026447	0.418065	0.0641747	0.0494959	0.108226	0.163618	0.107836	0.447707	0.129602	0.152935	-0.376731	0.0372304	-0.0411699	0.231783	-0.0154502	0.181914	0.158177	0.00338978	0.0790861	0.016926	0.0553071	0.1492	0.0152929	-0.170746	-0.434762	0.0595354	0.157683	-0.171602	-0.0265594	0.168569	-0.211905	-0.0234606	0.0530701
ADCY10	1	q24.2	ENST00000367848 // Hs.320892 // ADCY10 // 55811 // adenylate cyclase 10 (soluble)	0.185534	0.156945	0.0349076	-0.380461	0.148945	-0.0480137	-0.0622234	0.0655682	0.183978	0.086385	0.0189391	-0.0232743	0.370458	0.0119896	0.145314	0.078169	0.0159799	0.144812	-0.371985	-0.0114892	0.133773	0.163044	-0.0139015	0.10835	0.143195	0.160097	-0.099047	0.450989	-0.000734202	-0.0321894	0.463234	0.0788944	-0.357141	0.0055383	0.01639	0.0785661	-0.00712483	-0.0125436	0.129893	0.389924	-0.0331382
ADCY2	5	p15.31	ENST00000338316 // Hs.481545 // ADCY2 // 108 // adenylate cyclase 2 (brain)	0.0737878	0.0676714	0.615982	0.130849	-0.00387486	0.186519	-0.0273757	0.38008	0.685279	0.115235	0.476371	0.212246	0.117868	0.389868	0.352867	0.147309	0.526328	0.367734	0.118816	0.128765	0.281356	0.430756	0.274799	0.438315	0.399376	0.693381	0.0836051	0.825418	0.119189	0.562811	0.773429	0.576766	0.0929105	0.351642	0.349996	0.653324	0.283089	0.613706	0.00635011	0.714051	-0.0471324
ADCY3	2	p23.3	ENST00000260600 // Hs.467898 // ADCY3 // 109 // adenylate cyclase 3	-0.0142961	0.0130455	-0.143845	-0.0452917	-0.232205	-0.040275	-0.0251305	-0.702896	-0.0807775	0.161912	0.255588	0.0338125	0.121955	-0.00931339	0.201363	0.146468	-0.132098	0.167921	0.0699935	-0.140824	-0.0395619	-0.721834	0.241113	-0.328484	0.199053	-0.0778422	-0.102335	-0.0473358	0.0126799	-0.254176	0.00519198	0.114241	0.0814678	0.0713155	-0.157051	0.111892	0.257628	-0.253894	-0.261528	-0.0248156	0.00896588
ADCY4	14	q12	ENST00000310677 // Hs.443428 // ADCY4 // 196883 // adenylate cyclase 4	-0.312368	-0.327511	-0.18721	0.0922104	-0.372122	-0.124431	-0.0904427	0.0512667	0.202089	0.287862	0.129065	0.0179593	-0.030392	0.090982	0.257596	0.342149	-0.143449	0.169589	0.103927	0.0497538	-0.10855	0.189674	0.0100707	0.17105	0.25679	0.203551	-0.130549	-0.419957	0.021802	-0.187211	-0.48754	-0.107473	0.0761128	0.0988394	0.0932574	-0.14915	0.0431493	-0.0731621	-0.338513	-0.433351	-0.0167116
ADCY5	3	q21.1	ENST00000462833 // Hs.593292 // ADCY5 // 111 // adenylate cyclase 5	-0.030627	-0.0321131	0.283133	0.4414	-0.391314	0.223209	0.384132	0.178428	0.598692	0.373679	0.279209	0.257312	0.42386	0.400046	0.468092	0.397554	0.27626	0.424913	0.447884	0.0776624	0.173468	0.340277	0.369752	0.401752	0.460653	0.552356	0.178654	0.567279	0.311529	0.337532	0.535862	0.314907	0.405443	0.353825	0.400636	0.249702	0.339213	0.320119	-0.376915	0.485289	0.145913
ADCY6	12	q13.12	ENST00000307885 // UTR-3 // 0 // Hs.525401 // ADCY6 // 112 // adenylate cyclase 6	-0.045567	-0.146443	-0.12375	-0.352291	-0.0354795	0.370494	0.384879	-0.0635449	-0.132244	-0.157211	-0.240734	0.0517286	-0.0488182	-0.466143	-0.285205	-0.205019	-0.0973215	-0.310307	-0.369837	0.0670603	-0.0830303	-0.0818076	-0.144968	-0.33424	-0.289682	-0.0796894	0.199715	-0.0663063	-0.0174233	-0.225167	-0.0301468	-0.132905	-0.285247	-0.240091	-0.314267	-0.109376	-0.139318	-0.186326	0.0358655	-0.0499524	0.0293071
ADCY7	16	q12.1	ENST00000394697 // Hs.513578 // ADCY7 // 113 // adenylate cyclase 7	-0.311411	-0.282425	0.193247	0.0188539	-0.393504	-0.103531	-0.0894774	-0.35312	-0.160549	-0.225169	-0.907311	0.0426094	-0.474057	0.0248129	0.13396	-0.225094	-0.17468	0.121244	0.109001	-0.114631	0.000172435	-0.356006	-0.761213	0.161386	0.119031	-0.114749	-0.1261	-0.0238577	-0.0021037	-0.295982	-0.0687666	0.223807	-0.0499347	-0.27062	0.0653494	0.213298	-0.988682	-0.285436	-0.345435	-0.053239	-0.0100994
ADCY8	8	q24.22	ENST00000286355 // Hs.591859 // ADCY8 // 114 // adenylate cyclase 8 (brain)	0.343733	0.108089	0.624228	0.800049	0.771634	0.372866	0.351185	0.594731	0.365951	0.12248	0.702628	0.535567	0.196545	0.801827	0.489755	0.162324	0.314545	0.344861	0.72181	0.220395	0.379076	0.641147	0.805303	0.776459	0.536856	0.391612	0.220923	0.835376	0.523088	0.380654	0.815005	0.923345	0.719986	0.0968035	0.758426	0.830348	0.85863	0.361845	0.754004	0.738156	0.374265
ADCY9	16	p13.3	ENST00000294016 // Hs.391860 // ADCY9 // 115 // adenylate cyclase 9	-0.00162152	0.071607	-0.215026	0.0410064	0.0277761	-0.0663477	0.175661	-0.346638	-0.116414	0.0230818	0.00842492	0.0373324	-0.0586162	0.0740534	-0.333841	-0.299005	-0.00290897	-0.329332	0.0744834	-0.111703	0.0647687	-0.313761	0.0244409	0.105266	-0.325289	-0.100308	0.0107186	0.228826	0.0350167	-0.00495466	0.169428	-0.189091	0.0583941	-0.192647	0.109149	-0.19901	-0.0352916	-0.0267766	0.0513987	0.179691	0.0633894
ADCYAP1R1	7	p14.3	ENST00000304166 // Hs.377783 // ADCYAP1R1 // 117 // adenylate cyclase activating polypeptide 1 (pituitary) receptor type I	-0.234186	0.0242126	-0.218413	-0.512054	-0.328386	0.376878	0.229373	-0.23992	-0.0304966	0.385148	0.0391094	0.0226186	0.0822066	0.142928	0.46995	0.444555	0.104179	0.451055	-0.465204	0.0578685	0.103163	0.0193772	-0.013034	0.173201	0.477038	-0.0243417	0.138814	0.377159	0.047651	0.117702	0.334469	-0.138395	-0.486313	0.032002	0.104578	-0.167983	-0.0104782	0.151759	-0.258014	0.300353	0.00469716
ADD1	4	p16.3	ENST00000264758 // Hs.183706 // ADD1 // 118 // adducin 1 (alpha)	0.416509	0.413574	-0.258721	0.0699536	0.309621	0.143436	0.15184	-0.249483	-0.0707674	-0.700047	-0.350325	-0.0108967	-0.0848909	-0.393854	0.189791	-0.760712	0.0821896	0.18783	0.0628845	-0.112957	-0.0397983	-0.290826	-0.317789	-0.428798	0.180928	-0.0784134	0.0729775	-0.0838145	-0.0179846	0.0219486	-0.0392039	-0.179913	0.0978159	-0.1812	-0.370173	-0.222505	-0.386497	0.0312651	0.262399	-0.0443606	0.0261547
ADD2	2	p13.3	ENST00000403045 // Hs.188528 // ADD2 // 119 // adducin 2 (beta)	0.301512	0.258266	0.236391	0.0761711	0.161277	-0.0464746	-0.0193874	-0.202437	-0.0494071	0.366696	0.298732	0.0562097	0.0642587	0.127396	0.167865	0.38931	0.0795722	0.13695	0.0800949	0.0382394	-0.0399091	-0.0606452	0.230117	0.196108	0.1945	-0.0351407	-0.0858726	-0.0191171	0.0581485	0.121593	-0.019677	0.126587	0.0621791	0.0520283	0.108335	0.137462	0.257424	0.150822	0.175568	-0.02845	0.0478892
ADD3	10	q25.1	ENST00000277900 // Hs.501012 // ADD3 // 120 // adducin 3 (gamma)	0.116819	0.0840834	-0.242936	0.117267	0.0313785	-0.403367	-0.389599	0.174721	-0.0780667	0.11182	-0.324569	-0.246167	0.147484	0.0803516	0.169368	0.110643	-0.212347	0.431091	0.134193	0.0462383	-0.00325828	0.187525	-0.0171309	0.189131	0.17066	-0.0877865	-0.321648	-0.00908369	-0.234639	-0.244276	-0.0252654	-0.200167	0.1084	0.0577465	0.110712	-0.242675	-0.0983122	-0.208121	-0.0829986	-0.028377	-0.165758
ADGB	6	q24.3	ENST00000326929 // Hs.720870 // ADGB // 79747 // androglobin	-0.197146	-0.177374	-0.191702	-0.393028	-0.114453	0.023483	0.189209	0.0170508	-0.0196884	0.0533528	-0.303354	-0.636645	-0.104605	0.103612	-0.432318	-0.132965	0.932305	-0.44035	-0.341919	-0.00111625	0.0655421	0.0900945	-0.304574	0.157981	-0.405634	-0.00615143	0.0607305	0.304133	-0.617929	1.02176	0.258417	-0.189236	-0.33775	-0.0814798	0.108408	-0.20532	-0.325658	0.99777	-0.0904423	0.255145	-0.475181
ADH1A	4	q23	ENST00000209668 // Hs.654433 // ADH1A // 124 // alcohol dehydrogenase 1A (class I), alpha polypeptide	-0.256196	-0.230908	0.077395	-0.398885	-0.210514	-0.372446	-0.361235	-0.302472	-0.0681056	-0.615123	0.0141465	0.00750165	-0.138342	-0.420473	-0.42527	-0.613239	-0.199667	-0.480816	-0.401862	-0.034399	-0.030601	-0.321091	-0.0260777	-0.330369	-0.390509	-0.0790168	-0.260761	-0.00229035	0.0357286	-0.263477	0.0116105	0.0517523	-0.327246	-0.229682	-0.414093	0.064241	0.0110746	-0.275462	-0.216864	-0.00823627	-0.0670778
ADH1B	4	q23	ENST00000305046 // Hs.4 // ADH1B // 125 // alcohol dehydrogenase 1B (class I), beta polypeptide	-0.246969	-0.236748	0.0230201	-0.408215	-0.353066	-0.41755	-0.373864	-0.37543	-0.10253	-0.63085	-0.025681	-0.0502887	-0.111959	-0.428198	-0.433907	-0.695751	-0.208821	-0.407711	-0.39242	-0.136482	-0.058318	-0.379015	0.00805247	-0.392778	-0.409049	-0.112798	-0.297752	-0.03362	-0.01122	-0.251373	-0.0311275	0.120899	-0.3419	-0.23669	-0.379368	0.106368	0.0406631	-0.190475	-0.276279	-0.0265287	-0.049372
ADH1C	4	q23	ENST00000505942 // Hs.654537 // ADH1C // 126 // alcohol dehydrogenase 1C (class I), gamma polypeptide	-0.279943	-0.293497	-0.0233559	-0.339213	-0.199488	-0.33908	-0.381329	-0.291335	-0.0636057	-0.633685	0.00464632	-0.00012068	-0.116992	-0.492555	-0.453878	-0.722648	-0.202589	-0.405782	-0.313978	-0.0835556	-0.0421393	-0.313806	-0.0126403	-0.414401	-0.432885	-0.0732064	-0.314352	0.00677136	-0.0205776	-0.257286	-0.0191507	0.0159327	-0.302136	-0.183403	-0.457472	-0.0178098	-0.00934288	-0.209139	-0.24264	-0.0434338	-0.060723
ADH4	4	q23	ENST00000265512 // Hs.1219 // ADH4 // 127 // alcohol dehydrogenase 4 (class II), pi polypeptide	-0.212122	-0.216615	0.0469993	-0.362205	-0.197992	-0.310159	-0.298314	-0.323063	-0.00824542	-0.491856	0.0333718	0.0291803	-0.00731917	-0.409003	-0.356841	-0.607312	-0.173495	-0.360311	-0.310192	-0.0473069	-0.00473608	-0.365876	0.0456242	-0.36176	-0.360558	-0.0168592	-0.255474	-0.0367357	0.0302842	-0.291326	-0.00855192	0.163922	-0.329519	-0.163959	-0.352878	0.0993491	0.0849154	-0.194177	-0.153577	-0.00301417	0.0295546
ADH5	4	q23	ENST00000296412 // Hs.78989 // ADH5 // 128 // alcohol dehydrogenase 5 (class III), chi polypeptide	-0.257862	-0.215854	-0.0323155	-0.480193	-0.297574	-0.370133	-0.305298	-0.402615	-0.125554	-0.518666	-0.0409848	0.00827158	-0.13696	-0.538096	-0.381265	-0.699498	-0.261223	-0.520012	-0.539553	-0.184603	-0.0895245	-0.416521	-0.0402103	-0.362002	-0.404676	-0.112521	-0.284575	-0.106988	-0.0365447	-0.362589	-0.00518442	0.0845129	-0.428012	-0.29038	-0.430281	0.126257	-0.0107013	-0.285952	-0.312212	0.013357	-0.0294332
ADH6	4	q23	ENST00000237653 // Hs.586161 // ADH6 // 130 // alcohol dehydrogenase 6 (class V)	-0.242253	-0.305837	0.0530511	-0.486577	-0.332341	-0.341127	-0.382782	-0.423807	-0.108549	-0.626293	0.00339133	-0.0384508	-0.225879	-0.501294	-0.420547	-0.746855	-0.232836	-0.482828	-0.412841	-0.117042	-0.0869073	-0.4955	-0.0427458	-0.435344	-0.459985	-0.101932	-0.221512	-0.0980364	-0.0850809	-0.312375	-0.0605332	0.0513236	-0.356249	-0.203635	-0.429631	0.0262411	-0.0128652	-0.320768	-0.293233	-0.108756	-0.0638855
ADH7	4	q23	ENST00000209665 // Hs.389 // ADH7 // 131 // alcohol dehydrogenase 7 (class IV), mu or sigma polypeptide	-0.311251	-0.252616	0.0897409	-0.367765	-0.334935	-0.364509	-0.312011	-0.315256	-0.094831	-0.572168	-0.0222307	-0.0627254	-0.108041	-0.398313	-0.361237	-0.614207	-0.173475	-0.360553	-0.335272	-0.0910832	-0.044646	-0.374355	-0.00779809	-0.392579	-0.300825	-0.0867161	-0.255979	-0.0580754	-0.0566129	-0.260656	-0.00875572	0.147843	-0.325712	-0.212582	-0.40019	0.112471	9.85e-05	-0.18701	-0.277952	-0.0252177	-0.0819864
ADHFE1	8	q13.1	ENST00000276576 // Hs.720023 // ADHFE1 // 137872 // alcohol dehydrogenase, iron containing, 1	0.454829	0.30114	0.28179	0.394916	0.313202	-0.00178418	-0.126814	0.136277	0.358858	-0.701932	0.758846	0.142956	0.285537	0.40468	0.491845	-0.811279	-0.184561	0.1287	0.38082	0.0926292	0.242136	0.269521	0.914198	0.297483	0.288609	0.372578	-0.0633578	0.622377	0.135573	-0.267319	0.614622	0.318542	0.409124	0.0932396	0.371031	0.314985	0.939224	-0.233502	0.302774	0.571943	0.0285968
ADI1	2	p25.3	ENST00000327435 // Hs.502773 // ADI1 // 55256 // acireductone dioxygenase 1	-0.0622284	-0.0656259	-0.0968381	-0.438733	-0.284219	-0.0307624	-0.023722	-0.668018	-0.125117	0.128349	0.340127	0.03951	-0.114417	-0.0708695	0.10791	0.0954647	0.024745	0.11582	-0.41249	-0.0437311	-0.0137127	-0.694419	0.301469	-0.332973	0.206352	-0.0362399	-0.0614066	0.20693	0.104433	0.0353914	0.310265	-0.235776	-0.441836	0.0371248	-0.302186	-0.426044	0.361797	0.0931823	-0.192344	0.263062	0.062955
ADIG	20	q11.23	ENST00000416116 // Hs.368028 // ADIG // 149685 // adipogenin	-0.0254519	-0.0178463	-0.0336414	0.0139616	-0.215346	0.212118	0.085817	0.0896411	0.33618	-0.189564	0.214216	0.0214491	0.258805	0.413518	0.1514	-0.160233	0.335247	0.133217	0.0445956	-0.0344609	0.0317816	0.189171	0.161602	0.440334	0.149588	0.262998	0.274883	0.573539	-0.0528341	0.361849	0.377533	0.279338	0.0512188	0.239673	0.306491	0.0433487	0.10014	0.422513	-0.188099	0.359859	0.046185
ADIPOQ	3	q27.3	ENST00000412955 // Hs.80485 // ADIPOQ // 9370 // adiponectin, C1Q and collagen domain containing	0.461542	0.271675	0.754377	0.320593	0.330203	0.340248	0.358702	0.81704	0.616017	0.525628	0.277749	0.744018	0.46599	0.58778	0.457733	0.502827	0.269803	0.418301	0.369737	0.300328	0.210021	0.858937	0.399784	0.63923	0.461234	0.654294	0.288048	0.561832	0.755326	0.304555	0.525996	0.736803	0.385271	0.508001	0.614032	0.723488	0.387023	0.279009	0.279707	0.490783	0.642692
ADIPOR1	1	q32.1	ENST00000340990 // Hs.740387 // ADIPOR1 // 51094 // adiponectin receptor 1	0.195323	0.208878	0.00755057	-0.0518282	0.140115	-0.109586	-0.0676131	0.0541194	0.147046	-0.185898	0.332087	0.0415749	0.0357796	0.0370032	-0.374125	-0.208728	-0.0378372	-0.350975	-0.0846363	0.0115941	-0.136913	0.177152	0.193011	0.100858	-0.319338	0.124862	-0.0566151	-0.126582	0.0592195	-0.0118654	-0.111664	0.469075	-0.056399	-0.0171951	0.0466905	0.367462	0.119034	-0.0238433	0.134961	-0.0977907	0.000134071
ADIPOR2	12	p13.33	ENST00000357103 // Hs.371642 // ADIPOR2 // 79602 // adiponectin receptor 2	0.228188	0.241399	-0.0958047	-0.56339	0.187591	-0.35511	-0.356614	-0.339178	-0.177058	0.437593	0.439759	0.0375426	-0.308263	-0.337644	0.429422	0.487327	-0.186123	0.400692	-0.496414	-0.108229	-0.0384874	-0.360804	0.458747	0.100509	0.426911	-0.149208	-0.252128	-0.0465211	0.01832	-0.263408	-0.0481487	0.127766	-0.505154	-0.259279	-0.353732	0.116427	0.367643	-0.189511	0.232511	-0.018254	0.036189
ADK	10	q22.2	ENST00000286621 // Hs.656586 // ADK // 132 // adenosine kinase	0.247769	0.238921	-0.175756	0.381024	0.199182	0.167773	0.190586	0.202003	-0.106051	0.0624618	-0.0269963	-0.255019	0.0789508	0.0530974	-0.378937	0.0203316	-0.225842	0.11893	0.359929	0.00869677	-0.0523639	0.168934	-0.00616046	0.15963	-0.362585	-0.0986032	0.024757	-0.0948119	-0.266874	-0.27136	-0.0734122	-0.226136	0.320489	0.0146782	0.084976	-0.113096	-0.066719	-0.287647	0.121653	-0.0425736	-0.161133
ADM2	22	q13.33	ENST00000362068 // UTR-3 // 0 // Hs.449099 // ADM2 // 79924 // adrenomedullin 2	-0.313881	-0.209901	-0.180447	-0.388547	-0.295623	-0.128174	-0.137038	-0.187386	-0.10462	-0.0336043	-0.30292	-0.596603	-0.532302	-0.287436	-0.272118	0.000239	-0.434804	-0.239143	-0.367277	-0.118322	-0.121112	-0.126161	0.0457323	-0.0564528	-0.112168	-0.0567812	0.05032	-0.511508	-0.536201	-0.573776	-0.328558	-0.0902095	-0.323261	-0.192138	-0.293029	-0.078262	-0.0485315	-0.512265	-0.0699613	-0.284525	-0.488893
ADNP	20	q13.13	ENST00000349014 // Hs.570355 // ADNP // 23394 // activity-dependent neuroprotector homeobox	0.548551	0.533696	0.413262	0.0831673	0.518103	0.242886	0.040557	-0.0129414	0.233742	0.20917	0.320736	0.035376	1.03372	0.835486	0.208887	0.180077	0.0653233	0.151286	0.102932	0.0882608	0.310381	0.132999	0.230926	0.814616	0.177489	0.239005	0.249609	0.921269	0.054117	0.0564775	0.757609	0.662585	0.0684024	0.195679	0.752179	0.569272	0.333966	0.0760749	0.509563	0.718562	0.077071
ADNP2	18	q23	ENST00000262198 // Hs.131915 // ADNP2 // 22850 // ADNP homeobox 2	-0.852592	-0.776907	-0.698363	-0.527456	-0.960133	0.449946	0.392228	-0.182801	-0.0565266	-0.727542	-0.278055	-0.193022	-0.133997	-0.429044	0.161773	-0.703222	-0.21671	0.481044	-0.516253	0.00687272	-0.152733	-0.274945	0.184776	-0.394305	0.361403	-0.0848639	0.549992	-0.679059	-0.182914	-0.247613	-0.627516	-0.350046	-0.452955	-0.255072	-0.341661	-0.462459	-0.0366274	-0.18346	-0.83189	-0.603677	-0.156056
ADO	10	q21.3	ENST00000373783 // UTR-3 // 0 // Hs.99821 // ADO // 84890 // 2-aminoethanethiol (cysteamine) dioxygenase	0.191289	0.185909	-0.102484	0.188028	0.257719	0.170877	0.373361	0.269353	0.005905	-0.189843	0.399441	-0.105031	0.196021	-0.321186	-0.44172	-0.179974	1.8983	-0.297295	0.204444	0.12743	0.0773002	0.266936	0.313109	-0.228362	-0.233989	0.0491684	0.130611	0.100841	-0.116373	2.01641	0.0684607	-0.0688405	0.022492	0.0508201	-0.250861	0.0459085	0.323356	1.93731	0.192699	0.0880083	-0.108304
ADORA1	1	q32.1	ENST00000309502 // Hs.77867 // ADORA1 // 134 // adenosine A1 receptor	0.203488	0.192872	0.0715636	0.0544571	0.118106	-0.034616	-0.0426054	0.0999879	0.236532	-0.234004	0.454977	0.322106	0.0679357	0.0766541	-0.32538	-0.229589	0.0847393	-0.331122	0.0945833	0.0294845	-0.0659146	0.203024	0.219877	0.132732	-0.264625	0.227371	-0.116324	-0.0411401	0.342986	0.0797898	-0.0274277	0.47134	0.0355514	0.0192552	0.0442583	0.338047	0.172337	0.120187	0.127507	-0.0509678	0.233612
ADORA2B	17	p12	ENST00000304222 // Hs.167046 // ADORA2B // 136 // adenosine A2b receptor	-0.291037	-0.306288	-0.17245	-0.428619	-0.314392	-0.112249	-0.0643081	-0.264836	-0.127501	0.109326	-0.27508	-0.4814	-0.116143	-0.448003	-0.378541	0.117372	-0.228948	-0.342281	-0.346875	-0.098902	-0.0305105	-0.324661	-0.274957	-0.369535	-0.346175	-0.143327	-0.0996343	-0.0671231	-0.507479	-0.316167	-0.0235695	-0.224511	-0.374961	-0.121725	-0.37234	-0.19681	-0.296516	-0.352574	-0.267094	-0.0248073	-0.411442
ADORA3	1	p13.2	ENST00000355437 // Hs.281342 // ADORA3 // 140 // adenosine A3 receptor	-0.269491	-0.284647	-0.123944	0.128695	-0.0372059	-0.023278	-0.0222474	0.21115	0.20234	0.134477	0.023418	0.0309105	-0.136155	-0.477276	0.103544	0.134566	0.048044	0.0986952	0.140736	-0.0188315	-0.213818	0.155533	-0.0327484	-0.395493	0.107404	0.201814	0.0195474	-0.533352	0.0120231	0.0683365	-0.521432	0.0770455	0.101375	-0.0145286	-0.39406	0.0972321	-0.0136107	0.0434165	0.0207378	-0.46965	-0.0403636
ADPGK	15	q24.1	ENST00000311669 // Hs.654636 // ADPGK // 83440 // ADP-dependent glucokinase	0.0773535	0.0748675	-0.204808	0.649573	0.106207	-0.327856	-0.274143	-0.669502	-0.0656349	-0.15064	0.0831259	0.0828593	-0.319722	-0.32867	-0.271608	-0.169876	-0.201005	-0.325556	0.624828	-0.0756916	0.0884624	-0.317473	0.0266856	-0.288137	-0.32372	-0.0469599	-0.248252	0.384816	0.092651	-0.22372	0.334001	-0.132078	0.590911	-0.0754629	-0.267119	-0.142701	-0.0528882	-0.215208	0.181743	0.311411	0.226668
ADPRH	3	q13.33	ENST00000357003 // Hs.99884 // ADPRH // 141 // ADP-ribosylarginine hydrolase	-0.0309306	0.112991	0.268269	-0.500431	-0.268515	0.291808	0.380868	0.217811	0.8085	0.327531	0.303368	0.230811	0.529313	0.395796	0.0876892	0.379323	0.254074	0.114091	-0.45749	0.0678622	0.221887	0.34855	0.354816	0.368322	0.136192	0.756292	0.254762	0.603483	0.357499	0.395155	0.53369	0.356453	-0.477086	0.338155	0.328123	0.317606	0.378945	0.447401	-0.230335	0.509513	0.265122
ADPRHL1	13	q34	ENST00000356501 // Hs.98669 // ADPRHL1 // 113622 // ADP-ribosylhydrolase like 1	-0.227138	-0.18216	-0.568627	0.06195	-0.307124	-0.37869	-0.354871	-0.173847	0.282767	-0.100121	-0.297544	0.0726406	0.192774	0.090837	-0.23798	0.164114	0.207924	-0.261167	0.0239412	-0.0403468	0.141294	-0.168623	-0.302948	0.131027	-0.223562	0.243267	-0.137731	0.378103	0.0710112	0.138933	0.362974	-0.543735	0.0929132	0.0743748	0.167177	-0.592654	-0.328703	0.0693422	-0.319266	0.31352	0.104783
ADPRHL2	1	p34.3	ENST00000373178 // Hs.18021 // ADPRHL2 // 54936 // ADP-ribosylhydrolase like 2	-0.174245	-0.095157	-0.121703	0.164098	-0.0522004	0.256687	0.245687	0.0794439	-0.100842	-0.246649	0.0330359	0.0814457	0.457177	0.0654314	0.248105	-0.237144	0.0552411	0.202725	0.082161	-0.00201486	0.258938	0.09171	0.0978497	0.208997	0.201288	-0.0704664	0.168602	0.555361	0.0356966	0.0953001	0.518911	-0.135369	0.134107	-0.127178	0.139418	-0.0227536	0.0874281	-0.0157746	0.0288359	0.480903	0.0269016
ADRA1A	8	p21.2	ENST00000276393 // Hs.709175 // ADRA1A // 148 // adrenoceptor alpha 1A	0.302866	0.095498	-0.275054	-0.43117	0.313835	-0.377527	-0.362625	-0.404196	-0.630626	-0.664053	0.0172139	-1.13911	-0.0796014	-0.367058	-0.35153	-0.712317	0.0571683	-0.371359	-0.385289	-0.102461	-0.154691	-0.407084	0.0994979	-0.39932	-0.345299	-0.622522	-0.219052	-0.402166	-1.09069	-0.0195745	-0.500824	-0.248353	-0.385012	-0.661603	-0.347363	-0.249537	0.0335958	0.108857	0.265	-0.463965	-0.7573
ADRA1B	5	q33.3	ENST00000306675 // Hs.368632 // ADRA1B // 147 // adrenoceptor alpha 1B	0.0492107	0.0637565	0.0274557	0.0646287	0.0422583	0.0290285	-0.0370962	-0.0208648	0.262385	0.542661	0.4408	0.0376183	0.0657565	0.0838719	0.114849	0.504723	-0.174414	0.11412	0.100642	-0.101245	0.0846403	-0.145568	0.303264	0.141092	0.148736	0.246261	-0.0947197	0.267668	0.0537177	-0.251205	0.2748	0.0873293	0.0389281	0.161102	0.0496519	0.078172	0.349875	-0.202319	0.0736898	0.247831	-0.00467617
ADRA1D	20	p13	ENST00000379453 // Hs.557 // ADRA1D // 146 // adrenoceptor alpha 1D	0.443591	0.364836	-0.0139965	-0.486915	0.426222	-0.314307	-0.0462877	0.481664	0.44469	0.153566	0.254776	0.270689	0.652693	0.183271	-0.348923	0.122617	0.0770749	-0.386721	-0.454032	0.102978	0.0983642	0.502738	0.212898	0.156585	-0.34419	0.449801	-0.00516349	0.263805	0.265567	0.0899187	0.0135105	0.10227	-0.439942	0.424138	0.129121	-0.0802949	0.160936	0.0729528	0.403335	0.0186766	0.233606
ADRA2A	10	q25.2	ENST00000280155 // Hs.249159 // ADRA2A // 150 // adrenoceptor alpha 2A	0.00964679	-0.0156238	-0.22708	0.0964981	-0.0326296	-0.380979	-0.368608	0.133275	-0.0976195	0.0387977	-0.31356	-0.237687	0.0697176	0.0466689	0.081957	0.0975357	-0.238794	0.370972	0.0967633	-0.00129773	-0.0419674	0.15382	-0.0436003	0.17254	0.126745	-0.0968556	-0.290083	-0.0181066	-0.271599	-0.325491	-0.0258313	-0.237142	0.10447	0.0105299	0.0495327	-0.245524	-0.0823797	-0.284619	-0.0851845	-0.0194547	-0.169027
ADRA2B	2	q11.1	ENST00000409345 // Hs.247686 // ADRA2B // 151 // adrenoceptor alpha 2B	0.0940246	0.0785794	0.241158	0.0880731	0.0580744	-0.0501411	-0.0306059	0.180079	-0.0425154	0.100885	0.0603007	0.0577574	0.148489	0.122534	0.164763	0.0926299	0.101814	0.173162	0.117016	0.0696656	-0.0388558	0.225936	-0.000881667	0.132816	0.193965	-0.00636156	-0.0551674	-0.0617636	0.0483591	0.110703	-0.067377	0.142825	0.105933	0.0773406	0.0871807	0.136722	0.0161894	0.117409	-0.0266028	-0.0557393	0.0444172
ADRA2C	4	p16.3	ENST00000330055 // Hs.123022 // ADRA2C // 152 // adrenoceptor alpha 2C	0.412464	0.367086	-0.241781	0.0778439	0.299347	0.0688887	-0.077168	-0.178475	-0.0488281	-0.718784	-0.263289	0.0671082	-0.0619553	-0.281567	0.234877	-0.746431	0.0182356	0.238535	0.119676	-0.0618152	-0.0356006	-0.181409	-0.266447	-0.385086	0.246739	-0.057809	0.0270898	0.0491555	0.0647782	0.0131652	0.0374272	-0.195236	0.0512768	-0.207652	-0.316217	-0.219819	-0.274489	0.106851	0.280651	-0.00685375	0.0496889
ADRB1	10	q25.3	ENST00000369295 // Hs.99913 // ADRB1 // 153 // adrenoceptor beta 1	0.0533276	0.0507434	-0.223694	0.109848	-0.0169374	-0.323753	-0.31608	0.194888	-0.0910167	0.0701552	-0.341594	-0.219327	0.134773	0.0685554	0.442302	0.059334	-0.224593	0.79703	0.116622	0.0287639	-0.0389647	0.20495	-0.0513259	0.207528	0.479209	-0.0838171	-0.234085	-0.0486875	-0.235754	-0.292971	-0.0283716	-0.194078	0.115178	0.0403645	0.0520301	-0.231308	-0.118143	-0.263134	-0.0664263	-0.00656774	-0.174861
ADRB2	5	q32	ENST00000305988 // Hs.2551 // ADRB2 // 154 // adrenoceptor beta 2, surface	0.0748535	0.0637472	0.055503	0.132921	0.0517455	0.268473	0.391712	0.0139582	0.284847	0.322318	0.42638	0.0252294	0.0547142	0.0811237	0.0917873	0.282049	-0.208422	0.118581	0.169625	-0.100136	0.100954	-0.0572915	0.30417	0.138229	0.0922241	0.277973	0.192311	0.331866	0.0307468	-0.261159	0.279807	0.110922	0.0734562	0.189747	0.0828452	0.116966	0.3263	-0.185159	0.066948	0.263672	-0.0206688
ADRB3	8	p11.23	ENST00000345060 // Hs.2549 // ADRB3 // 155 // adrenoceptor beta 3	0.239253	0.107048	0.314283	0.134271	0.328092	0.0921725	-0.0654545	-0.287369	-0.292193	-0.46288	0.371887	0.215404	0.083795	-0.217164	0.5762	-0.581711	0.025709	0.575848	0.0624695	0.047535	0.0108015	-0.296415	0.346253	-0.255236	0.58363	-0.284365	0.159685	-0.376551	0.269996	-0.312989	-0.378474	0.280896	0.208721	-0.299302	-0.186205	0.400719	0.203794	-0.0920335	0.273134	-0.322592	0.331478
ADRBK1	11	q13.2	ENST00000308595 // Hs.83636 // ADRBK1 // 156 // adrenergic, beta, receptor kinase 1	-0.250305	-0.260721	0.384116	0.302584	0.0329161	0.170332	-0.0177392	-0.271727	0.0986523	0.228203	0.079781	-0.106355	0.0154068	0.257929	0.349743	0.171495	0.0769088	-0.183794	0.280786	-0.0194704	0.00230842	-0.24561	0.080446	0.23042	0.0747342	0.0599315	0.0138534	-0.000243516	-0.0859006	0.0542609	0.0426324	0.411314	0.23955	0.0712098	0.18909	0.353109	0.160411	0.111264	-0.0440448	0.0270086	-0.0372669
ADRBK2	22	q12.1	ENST00000324198 // Hs.657494 // ADRBK2 // 157 // adrenergic, beta, receptor kinase 2	0.0442179	0.017493	-0.285478	0.0622133	0.20439	-0.0985711	-0.096716	-0.395719	-0.089094	-0.268961	-0.394146	-0.541942	-0.0430197	-0.407869	0.126165	-0.308608	-0.188247	0.170775	0.0491419	-0.135216	-0.0448834	-0.433491	0.451838	-0.130818	0.100546	-0.117339	-0.194543	-0.070241	-0.543343	-0.243514	-0.0685372	-0.189816	0.0820469	-0.217571	-0.381731	-0.262129	0.205129	-0.208717	0.212404	-0.0639923	-0.453057
ADRM1	20	q13.33	ENST00000253003 // Hs.90107 // ADRM1 // 11047 // adhesion regulating molecule 1	0.783554	0.638874	0.643368	0.327035	0.766051	0.411839	0.396042	0.537813	0.304616	0.14119	0.449499	0.142885	0.353254	0.139455	0.383118	0.22952	0.0970423	0.372571	0.0950783	0.196198	0.409714	0.563054	0.334526	0.240867	0.326832	0.275684	0.363714	1.03231	0.144042	0.0902903	0.80243	0.980752	0.106073	0.227659	0.174712	0.746882	0.452346	0.0168377	0.606456	0.772948	0.155885
ADSL	22	q13.1	ENST00000216194 // Hs.75527 // ADSL // 158 // adenylosuccinate lyase	-0.186046	-0.1588	-0.257816	0.0460951	0.0342817	-0.0369019	-0.0221337	-0.375148	-0.144529	-0.150879	-0.360963	-0.50784	-0.181663	-0.410999	-0.419257	-0.241497	-0.198264	-0.445082	0.0112517	-0.10116	0.0573143	-0.398305	0.195816	-0.0924523	-0.461905	-0.103241	-0.162622	0.281138	-0.488948	-0.287835	0.267668	-0.238885	0.0723959	-0.217557	-0.313499	-0.117808	0.186515	-0.361714	0.0188622	0.284315	-0.429913
ADSS	1	q44	ENST00000366535 // Hs.498313 // ADSS // 159 // adenylosuccinate synthase	0.410226	0.38881	0.0725515	0.0930314	0.358974	0.00721721	-0.0484452	-0.332996	0.0262119	0.0983179	0.0353789	0.0727636	0.172204	-0.427124	-0.354008	0.119775	0.117277	-0.14709	0.0879056	-0.0534592	0.106361	-0.337301	0.196022	-0.332259	-0.299668	-0.0324271	-0.0289749	0.255917	0.0728028	0.0322871	0.259423	0.322938	0.0741283	0.0713379	-0.395591	0.259242	0.0639623	0.136943	0.380528	0.233002	-0.00245703
ADSSL1	14	q32.33	ENST00000330877 // Hs.592327 // ADSSL1 // 122622 // adenylosuccinate synthase like 1	0.178978	0.144348	0.201068	0.306947	0.108329	-0.0431788	0.0123774	-0.0548306	0.333937	0.0963097	0.0329578	0.0665001	-0.0595409	0.0955189	0.199447	0.201677	0.186413	0.255827	0.250208	0.0472985	-0.0219745	0.0769514	0.130444	0.159435	0.303926	0.386881	-0.0518938	0.0472918	0.0761974	0.183543	0.0142782	0.402843	0.193832	0.0133474	0.0966924	0.320422	0.184743	0.273717	0.159407	0.0553709	0.0597876
ADTRP	6	p24.1	ENST00000229583 // Hs.126409 // ADTRP // 84830 // androgen-dependent TFPI-regulating protein	0.0537869	0.0139581	-0.225326	0.373681	0.158335	0.197047	0.380751	-0.0187168	0.387525	0.100804	-0.331761	0.0336072	-0.0639977	0.0600101	0.0568488	0.0800424	0.089861	0.0677045	0.423971	-0.0180276	-0.00580532	-0.00493589	-0.298503	0.184716	0.0742604	0.421829	0.164026	-0.0106794	0.0234936	0.124872	-0.0410425	-0.215404	0.409876	0.616721	0.0332978	-0.242179	-0.354833	0.104507	0.132467	-0.0481608	0.0355634
AEBP1	7	p13	ENST00000223357 // Hs.439463 // AEBP1 // 165 // AE binding protein 1	-0.300564	-0.291841	-0.242883	-0.479217	-0.40559	0.271473	0.154437	0.0529221	-0.113169	0.37451	0.0343463	0.0547365	0.114323	0.0830442	0.196144	0.365819	0.0405931	0.225772	-0.454423	-0.012839	-0.0567096	0.226565	0.0515945	0.134285	0.232563	-0.119426	0.0336758	-0.0304921	0.0605995	0.0321934	-0.0181692	-0.25044	-0.408051	0.0253182	0.0768154	-0.252791	0.0238523	0.0687828	-0.330434	-0.0486936	0.0701201
AEBP2	12	p12.3	ENST00000512223 // Hs.126497 // AEBP2 // 121536 // AE binding protein 2	0.0677517	0.0356523	0.276246	-1.76814	0.067346	0.188422	0.199708	-0.0632185	-0.102533	0.848496	0.380614	0.0147604	-0.304797	-0.139623	-0.422486	0.883921	0.0253104	-0.405345	-1.62771	-0.0273508	-0.0181359	-0.212265	0.346966	0.112681	-0.388766	-0.102918	0.0545891	-0.085488	0.00414778	0.0116383	-0.0251422	0.322106	-1.29446	-0.19924	-0.108282	0.322978	0.293051	-0.00490888	0.077626	-0.0235327	0.029125
AEN	15	q26.1	ENST00000332810 // Hs.436102 // AEN // 64782 // apoptosis enhancing nuclease	0.0261383	0.0813256	-0.207382	0.533273	0.0293284	-0.359274	-0.361288	-0.110878	-0.0220855	-0.170066	-0.324018	0.0327728	-0.334409	0.0932086	0.131602	-0.224103	0.121353	0.118658	0.537206	-0.00968978	0.138628	0.110717	-0.286135	0.166198	0.139763	0.00349374	-0.240464	0.528994	0.0390663	0.0870845	0.497273	-0.11267	0.516189	-0.0976003	0.0922416	-0.135178	-0.330205	0.205352	0.100598	0.466679	0.145156
AFAP1	4	p16.1	ENST00000358461 // Hs.529369 // AFAP1 // 60312 // actin filament associated protein 1	0.0309919	0.0193215	-0.247555	0.103095	-0.0943697	0.149402	-0.0276729	0.237931	-0.0829186	-0.716385	-0.328713	0.0912806	-0.0273538	-0.379646	0.246655	-0.815672	0.0518217	0.238929	0.102863	0.0304237	-0.0493981	0.27806	-0.308957	-0.389372	0.268814	-0.0806698	0.0643354	-0.0284333	0.0899111	0.0519483	-0.03259	-0.168032	0.0761397	-0.219171	-0.355453	-0.22117	-0.323115	0.101732	-0.124983	-0.0372388	0.0698764
AFAP1L1	5	q32	ENST00000296721 // Hs.483793 // AFAP1L1 // 134265 // actin filament associated protein 1-like 1	0.0537667	0.0361317	0.0676466	0.0723214	0.0150865	0.0285765	0.0292486	0.0184657	0.273796	0.428199	0.566669	0.036664	-0.0610541	0.125095	0.234777	0.334519	-0.155826	0.145329	0.06138	-0.0813007	0.124306	-0.0141868	0.374244	0.183546	0.211444	0.298196	-0.0753137	0.403729	0.0311117	-0.255221	0.345533	0.105186	0.0582105	0.155524	0.121024	0.132286	0.427034	-0.208915	0.0183342	0.300945	-0.00478212
AFAP1L2	10	q25.3	ENST00000304129 // Hs.501106 // AFAP1L2 // 84632 // actin filament associated protein 1-like 2	0.0777556	0.0633003	-0.209242	0.0713406	0.0130323	-0.361645	-0.358291	0.198831	-0.0548813	0.146969	-0.305126	-0.167895	0.12854	0.158669	0.528188	0.168611	-0.166722	0.855971	0.105728	0.0522019	-0.0313142	0.203651	-0.0368224	0.253214	0.537279	-0.0500021	-0.244102	-0.0103458	-0.151658	-0.214411	0.0353898	-0.153498	0.0870139	0.0530125	0.171484	-0.221778	-0.091499	-0.230319	-0.106729	0.00351396	-0.0922425
AFF1	4	q21.3	ENST00000307808 // Hs.480190 // AFF1 // 4299 // AF4/FMR2 family, member 1	-0.259157	-0.250431	-0.222236	-0.397165	-0.301965	-0.38402	-0.351172	0.199993	-0.0733544	-0.657492	-0.365154	-0.0197784	-0.0972961	0.068804	0.138022	-0.760387	-0.193478	0.115988	-0.370041	0.00795818	-0.0304652	0.171423	-0.350796	0.133391	0.102174	-0.0592239	-0.269912	-0.0443648	-0.0041902	-0.237388	-0.05672	-0.199597	-0.359506	-0.200875	0.0984263	-0.193302	-0.386895	-0.233749	-0.307509	-0.0499077	-0.0410662
AFF2	X	q28	ENST00000286437 // Hs.496911 // AFF2 // 2334 // AF4/FMR2 family, member 2	-0.788004	-0.743951	-0.43908	-0.39855	-0.897813	-0.346737	-0.321826	-0.113436	-0.570613	0.131451	0.263664	0.0214703	0.102179	0.0464976	0.408676	0.139425	0.253521	0.404613	-0.368625	-0.015176	0.272695	0.0497036	0.181242	-0.338555	0.393948	-0.551839	-0.247176	0.793632	0.0969975	0.235697	0.740013	-0.137164	-0.355843	-0.601756	0.0657956	-0.064418	0.221624	0.333803	-0.789593	0.664538	0.264183
AFF3	2	q11.2	ENST00000317233 // Hs.444414 // AFF3 // 3899 // AF4/FMR2 family, member 3	0.0650066	0.0529242	0.250359	0.368932	-0.132621	-0.0550961	-0.041545	0.163208	-0.0702949	0.120013	0.0153252	0.038883	0.137507	0.0794665	0.117894	0.128395	0.0733653	0.102922	0.276543	-0.0123514	-0.022176	0.0722357	-0.00933529	0.134892	0.117651	-0.0610634	-0.0762418	-0.0131316	0.0212348	0.0976585	-0.00555706	0.13251	0.384408	0.0484665	0.0688067	0.130719	-0.0170978	0.101424	-0.0765817	-0.00642049	0.0255657
AFF4	5	q31.1	ENST00000265343 // Hs.519313 // AFF4 // 27125 // AF4/FMR2 family, member 4	-0.257765	-0.259694	0.0231055	-0.00867121	-0.345984	-0.00268409	0.317836	-0.0322262	0.194852	0.0718647	0.386354	-0.00478436	-0.0860183	-0.439673	0.15525	-0.136594	0.0333887	0.140072	0.00900939	-0.120785	0.0578904	-0.172496	0.314755	-0.223517	0.146482	0.179392	0.11131	0.195885	-0.023081	0.0290494	0.233089	0.0356406	0.0191945	0.128035	-0.386436	0.0510832	0.301358	-0.0299357	-0.324714	0.206922	-0.0374275
AFG3L1P	16	q24.3	ENST00000388970 // exon // 0 // Hs.534773 // AFG3L1P // 172 // AFG3 ATPase family gene 3-like 1 (S. cerevisiae), pseudogene	0.27339	0.238882	0.211601	0.627216	0.17717	-0.185515	-0.0698208	-0.490774	-0.156267	-0.243403	-0.864847	-0.44938	-0.0713556	-0.43603	-0.301732	-0.193633	-0.229292	-0.302369	0.643681	-0.0973212	-0.0893241	-0.453187	-0.758344	-0.42197	-0.327537	-0.131886	0.00570294	-0.0263474	-0.484122	-0.327153	-0.0550009	0.141921	0.600729	-0.23636	-0.36916	0.0835917	-0.819796	-0.259036	0.161803	-0.0765136	-0.375388
AFG3L2	18	p11.21	ENST00000269143 // Hs.726355 // AFG3L2 // 10939 // AFG3 ATPase family gene 3-like 2 (S. cerevisiae)	-0.228315	-0.187997	0.0669346	-0.523121	-0.300017	-0.00800444	0.300592	0.0232977	0.220304	-0.659319	-0.287723	-0.202583	-0.321596	-0.426466	0.147334	-0.753898	0.290877	0.122363	-0.470485	0.022633	0.0853422	0.0783952	0.102453	-0.390073	0.101618	0.222089	-0.0153326	0.274036	-0.192968	0.290848	0.288055	0.142312	-0.449632	0.16463	-0.342499	0.201522	-0.0370639	0.211941	-0.228951	0.295033	-0.18685
AFM	4	q13.3	ENST00000226355 // Hs.168718 // AFM // 173 // afamin	-0.0960332	-0.0534153	-0.206661	-0.380977	-0.138016	-0.387913	-0.335458	0.15342	-0.103714	-0.205718	-0.0151788	-0.0449532	-0.223804	-0.0399791	0.00791193	-0.192104	-0.210515	-0.0152276	-0.336277	-0.0402773	-0.0505961	0.165008	-0.048943	0.00286355	0.0246132	-0.105381	-0.294803	-0.130563	-0.0700308	-0.235662	-0.147582	-0.25856	-0.339355	-0.206683	-0.0898208	-0.27289	-0.018305	-0.224835	-0.11348	-0.115002	-0.0928865
AFMID	17	q25.3	ENST00000327898 // Hs.558614 // AFMID // 125061 // arylformamidase	0.560361	0.487532	0.0584122	0.0779359	0.349968	0.28589	0.236475	0.183667	0.262567	-0.0898596	0.181215	0.22286	0.0592207	-0.00178467	-0.149003	-0.009381	0.191541	-0.0530326	0.190603	0.124532	0.403734	0.323612	0.138616	0.118024	-0.124931	0.367295	0.12962	1.07318	0.316355	0.00963033	0.926496	0.151828	0.161759	-0.00302578	0.142354	0.0980692	0.15627	-0.0119786	0.448746	0.791561	0.358403
AFP	4	q13.3	ENST00000226359 // Hs.518808 // AFP // 174 // alpha-fetoprotein	0.0602816	0.00777059	-0.215713	-0.358952	0.0202809	-0.350182	-0.364612	0.190571	-0.0505885	-0.185956	0.000239207	-0.0105161	-0.123217	0.18818	0.194249	-0.174133	-0.199775	0.190702	-0.325864	0.0195651	-0.0363054	0.243508	-0.0359557	0.113508	0.104713	-0.0670342	-0.241069	0.0101114	-0.0333734	-0.196331	-0.0270647	-0.177885	-0.365536	-0.248221	0.111236	-0.193603	-0.0232378	-0.162769	0.0961065	-0.0533934	-0.109047
AFTPH	2	p14	ENST00000238856 // Hs.655167 // AFTPH // 54812 // aftiphilin	0.222037	0.194258	0.370919	0.0855638	0.123696	-0.132895	-0.108924	-0.210748	-0.133961	0.261995	0.246143	-0.0214648	0.100461	0.0779809	0.134309	0.285765	0.0841793	0.103995	0.0717662	-0.00807186	-0.0133209	-0.0913964	0.244253	0.131087	0.115124	-0.117773	-0.18585	-0.05495	-0.0246625	0.0782241	-0.0929204	0.404312	0.0776032	-0.00499731	0.0423095	0.404898	0.304076	0.117404	0.153428	-0.0347083	-0.0399501
AGA	4	q34.3	ENST00000264595 // Hs.207776 // AGA // 175 // aspartylglucosaminidase	-0.275773	-0.299078	0.053463	-0.435184	-0.29728	-0.407058	-0.383329	-0.425813	-0.12543	-0.648862	-0.00418748	-0.0604424	-0.188441	-0.527105	-0.51688	-0.622621	-0.269531	-0.491004	-0.372006	-0.176191	-0.13769	-0.421672	-0.0496774	-0.474311	-0.51113	-0.127692	-0.331516	-0.636548	-0.0571043	-0.322429	-0.557822	0.10979	-0.414812	-0.260418	-0.459813	0.0846284	-0.0151798	-0.315891	-0.242555	-0.528991	-0.0786768
AGAP1	2	q37.2	ENST00000304032 // Hs.435039 // AGAP1 // 116987 // ArfGAP with GTPase domain, ankyrin repeat and PH domain 1	0.0452186	0.0274265	0.134646	-0.512509	0.028253	-0.391481	-0.329205	-0.555185	0.232966	0.15624	-0.313869	-0.476371	0.129051	0.102354	-0.339971	-0.153284	-0.18019	-0.348186	-0.458895	-0.0191568	0.103391	-0.425579	-0.279851	-0.384853	-0.322026	0.259606	-0.241611	0.348156	-0.447382	-0.246802	0.323463	0.178295	-0.48181	0.364348	0.120365	0.0719871	-0.3343	-0.197575	-0.0760151	0.29417	-0.287047
AGAP11	10	q22.2	ENST00000374094 // Hs.511787 // AGAP11 // 119385 // ankyrin repeat and GTPase domain Arf GTPase activating protein 11	0.249862	0.243926	0.0193855	0.355355	0.298022	0.19851	0.244146	0.11886	0.086107	0.0976385	0.180426	-0.244595	0.036095	0.0629505	-0.223521	0.116831	0.089666	0.151457	0.244756	0.114333	0.014783	0.177645	-0.010224	0.088479	-0.053652	-0.0812385	0.118802	-0.0210055	-0.130232	-0.074924	-0.052544	-0.0783305	0.446668	0.051941	0.082651	0.0053315	-0.0229035	0.168121	0.0933185	-0.125856	0.171363
AGAP2	12	q14.1	ENST00000257897 // Hs.302435 // AGAP2 // 116986 // ArfGAP with GTPase domain, ankyrin repeat and PH domain 2	0.143393	0.0967961	-0.0644421	-0.410544	0.189504	-0.031478	-0.0504874	0.124933	0.362356	-0.0732555	0.00210918	0.108113	0.00884073	0.14578	-0.266864	-0.126505	-0.100324	-0.302621	-0.442837	0.0861913	0.00774309	0.0696222	-0.0184134	0.0681334	-0.231761	0.226707	-0.00457754	0.0850493	0.103366	-0.102239	0.0949346	-0.0851208	-0.383573	-0.127042	0.175026	-0.129012	-0.0417755	-0.131378	0.0446598	-0.0676151	0.0329253
AGAP3	7	q36.1	ENST00000335355 // Hs.647075 // AGAP3 // 116988 // ArfGAP with GTPase domain, ankyrin repeat and PH domain 3	-0.278456	-0.709976	0.316929	-0.0262747	-0.332185	0.347168	0.45609	0.14098	-0.0710474	0.225645	0.0441812	0.0598646	0.216415	-0.235186	0.571453	0.214649	0.213408	0.588078	0.0343275	0.0878505	-0.110003	0.287214	-0.0182548	-0.15373	0.635215	-0.0568573	0.189371	-0.0994464	0.121486	0.113821	-0.0727486	0.110863	-0.0101705	0.0538839	-0.248433	0.22089	-0.0342486	0.219767	-0.204883	-0.107373	0.0981582
AGAP6	10	q11.23	ENST00000374056 // Hs.536158 // AGAP6 // 414189 // ArfGAP with GTPase domain, ankyrin repeat and PH domain 6	0.231264	0.175136	-0.0540809	0.127266	0.235738	0.133065	0.143801	0.132062	-0.159168	0.00811053	0.22247	-0.182473	-0.0126999	-0.452882	-0.215505	-0.0202558	0.793093	-0.207362	0.0999247	0.0778828	-0.191827	0.155928	0.103648	-0.389323	-0.209737	-0.151065	0.0322999	-0.568938	-0.15192	0.829678	-0.434777	-0.110131	0.110681	-0.212564	-0.285283	-0.0140252	0.164321	0.700352	0.185616	-0.525218	-0.102354
AGBL1	15	q25.3	ENST00000421325 // Hs.679833 // AGBL1 // 123624 // ATP/GTP binding protein-like 1	0.0326937	0.0128199	-0.25093	0.458141	0.0367008	-0.36583	-0.338708	-0.104159	0.00104135	-0.180871	-0.30819	0.0223227	-0.377964	0.0641908	-0.479778	-0.188864	0.0374135	-0.45306	0.448063	-0.0330604	0.15384	0.0743149	-0.291518	0.140536	-0.414541	-0.0180362	-0.268933	0.524102	0.0226604	0.065802	0.481887	-0.214852	0.388117	-0.0942182	0.0647292	-0.230579	-0.311778	0.0765131	0.10893	0.446959	0.18469
AGBL2	11	p11.2	ENST00000298861 // Hs.147377 // AGBL2 // 79841 // ATP/GTP binding protein-like 2	-0.292597	-0.292858	-0.185821	-0.467505	-0.307483	0.346232	0.321273	-0.249712	-0.129363	0.132067	0.0298433	-0.194945	0.0490217	-0.00468682	0.156155	0.0168976	-0.476236	0.145069	-0.46539	-0.0381858	0.0534395	-0.259255	0.0583084	0.0623694	0.166799	-0.139806	0.232121	0.131864	-0.153907	-0.701923	0.163249	-0.14828	-0.395915	-0.0238185	0.0161688	-0.174888	-0.0217543	-0.687502	-0.243523	0.18909	-0.14902
AGBL3	7	q33	ENST00000275763 // Hs.648616 // AGBL3 // 340351 // ATP/GTP binding protein-like 3	0.261541	-0.22399	0.264657	0.137178	0.260557	0.184797	0.373718	0.0300921	-0.0438836	0.108174	-0.0254786	-0.00646113	0.261578	-0.402639	0.439693	0.117688	0.206226	0.465172	0.103068	-0.00598805	-0.0561536	0.151045	-0.0451542	-0.373564	0.383216	-0.063729	0.12651	-0.0417696	-0.00730561	0.10688	-0.0668354	0.12601	0.103512	0.0475677	-0.339574	0.112805	-0.0596914	0.161398	0.334397	-0.0404928	-0.0141235
AGBL4	1	p33	ENST00000371838 // Hs.551844 // AGBL4 // 84871 // ATP/GTP binding protein-like 4	-0.325546	-0.322217	-0.120094	0.0980463	-0.0360461	0.175949	0.175384	0.0842377	-0.0639617	-0.142094	-0.0198899	0.0275217	0.30234	0.0895351	0.0882167	-0.139519	0.0536089	0.104286	0.104829	0.0290792	0.0847667	0.124559	-0.0496275	0.142891	0.105489	-0.0531438	0.123776	0.29528	0.0160688	0.0799208	0.281313	0.127068	0.07058	-0.149371	0.088053	0.109296	-0.0538896	0.0832591	0.0232043	0.245856	-0.00855716
AGBL5	2	p23.3	ENST00000421915 // Hs.138207 // AGBL5 // 60509 // ATP/GTP binding protein-like 5	-0.0424547	-0.0174079	-0.0993765	-0.079583	-0.307781	-0.0932066	-0.0508154	0.130132	-0.0917209	0.0763	0.284113	0.03995	0.0176124	-0.044937	0.199808	0.134243	0.0485924	0.0990768	0.0415828	0.048655	-0.0283562	0.0758574	0.23143	-0.446625	0.152216	-0.114896	-0.142143	-0.0849406	0.035206	0.0795996	-0.0403141	0.064186	0.0001362	0.0787841	-0.185082	0.0885373	0.299649	0.0633833	-0.277233	-0.0295514	0.0315219
AGER	6	p21.32	ENST00000375055 // Hs.534342 // AGER // 177 // advanced glycosylation end product-specific receptor	-0.285297	-0.203071	-0.464896	0.001226	-0.0938825	-0.045666	-0.100702	-0.0757805	0.451807	0.000161	-0.576921	-0.056349	-0.088781	0.0313985	-0.422924	0.062632	0.0084405	-0.444269	0.0045725	-0.0972085	0.282755	-0.0176835	-0.44332	0.107354	-0.484399	0.510045	-0.105941	0.387552	-0.0604485	0.100391	0.197852	-0.292358	-0.0181965	0.513957	0.0933225	-0.241535	-0.521735	0.075069	-0.414305	0.192255	0.0770125
AGFG1	2	q36.3	ENST00000310078 // Hs.352962 // AGFG1 // 3267 // ArfGAP with FG repeats 1	0.023872	0.022209	0.0710497	-0.388682	0.00503995	-0.391257	-0.360375	-0.590796	0.150574	0.433628	-0.308228	-0.637987	0.075069	0.0107997	-0.43269	0.069802	-0.230966	-0.432365	-0.392898	-0.0656531	0.0746928	-0.481876	-0.288305	-0.446251	-0.405522	0.164568	-0.238842	0.245929	-0.600432	-0.302062	0.238912	0.10934	-0.325965	0.284933	0.0262713	0.00719947	-0.349041	-0.281234	-0.0805653	0.218148	-0.456535
AGFG2	7	q22.1	ENST00000430857 // Hs.521083 // AGFG2 // 3268 // ArfGAP with FG repeats 2	0.164454	-0.298778	0.532243	-0.371803	0.216077	0.109922	0.22564	0.116366	-0.18805	0.166209	0.118632	0.0339802	0.148598	-0.29687	0.299963	0.10147	0.156088	0.306898	-0.365721	0.107728	-0.0203756	0.246679	-0.0011544	-0.374534	0.215676	-0.112215	0.0197531	0.0281853	0.0953593	0.131462	-0.0092033	0.317186	-0.341038	0.0449394	-0.188341	0.416877	-0.047291	0.101398	0.238798	0.0435376	0.091367
AGGF1	5	q13.3	ENST00000503538 // Hs.634849 // AGGF1 // 55109 // angiogenic factor with G patch and FHA domains 1	0.0484304	0.0447904	-0.751134	-0.49049	-0.0057274	-0.01515	-0.328614	-0.232519	-0.670627	-0.620387	0.488272	0.0496677	-0.1242	-0.451347	-0.400339	-0.322954	-0.2279	-0.438223	-0.398912	-0.101211	0.00430742	-0.318304	0.371182	-0.38542	-0.417386	-0.700223	-0.0568277	-0.0307818	0.00737756	-0.286015	-0.0152822	-0.770745	-0.424782	-0.444685	-0.368882	-0.783698	0.368783	-0.230937	0.0065721	0.00101775	-0.00652507
AGK	7	q34	ENST00000355413 // Hs.699361 // AGK // 55750 // acylglycerol kinase	0.27709	-0.219224	0.264871	0.132294	0.289927	0.154022	0.34206	0.0396299	-0.0361042	0.349821	0.00278064	0.0255585	0.137972	0.43878	0.423525	0.415522	0.219435	0.433815	0.129921	0.0331569	-0.0290692	0.192104	-0.0567658	0.466784	0.403211	-0.0313784	0.109714	-0.0122528	0.0086166	0.102849	0.00287201	0.157408	0.101857	0.0632213	0.407484	0.123456	-0.0542345	0.185741	0.337567	-0.0203816	0.00921159
AGL	1	p21.2	ENST00000294724 // Hs.904 // AGL // 178 // amylo-alpha-1, 6-glucosidase, 4-alpha-glucanotransferase	-0.18391	-0.200174	-0.120242	0.120495	0.0143497	-0.0231284	-0.036707	0.0295801	-0.120154	0.101136	0.00549338	-0.00369235	-0.08427	-0.399509	0.131693	0.0512698	0.0218846	0.110296	0.0899703	0.0372148	-0.149655	0.083675	0.000231588	-0.374763	0.105442	-0.0918386	0.0100187	-0.523482	-0.0146073	0.0542487	-0.479233	0.074393	0.120555	-0.152099	-0.362008	0.0450371	-0.0269563	0.033622	0.0381604	-0.423521	-0.0291732
AGMAT	1	p36.21	ENST00000375826 // Hs.461532 // AGMAT // 79814 // agmatine ureohydrolase (agmatinase)	-0.286034	-0.27113	-0.0956058	0.284597	0.00500137	0.275176	0.0595796	0.0532847	0.372174	-0.133677	-0.133424	0.0704603	0.222179	0.0293919	0.105997	-0.109804	-0.07694	0.074718	0.329609	-0.0898664	-0.0927064	0.137476	-0.131882	0.121653	0.0933367	0.314884	0.070502	-0.0931567	0.00416675	-0.211652	0.0135617	-0.0640829	0.197418	0.0343216	-0.00575388	-0.17155	-0.063824	-0.16046	0.0145728	-0.0803085	-0.0283221
AGMO	7	p21.2	ENST00000342526 // Hs.670634 // AGMO // 392636 // alkylglycerol monooxygenase	-0.234177	0.0514291	0.0783377	0.0470316	-0.266004	-0.404094	-0.378292	-0.237842	-0.0840731	0.0769961	0.0243879	-0.006955	0.155856	-0.446966	0.0973188	0.0639051	0.040629	0.0953774	0.0714072	0.0172314	0.175437	-0.024112	0.00298451	-0.410957	0.0739624	-0.0887516	-0.220177	0.520572	-0.0168579	0.0320698	0.495306	0.0892172	0.0631206	0.0104882	-0.38964	0.0935679	-0.0225988	0.0632633	-0.194165	0.467269	0.00521774
AGPAT1	6	p21.32	ENST00000336984 // Hs.409230 // AGPAT1 // 10554 // 1-acylglycerol-3-phosphate O-acyltransferase 1 (lysophosphatidic acid acyltransferase, alpha)	-0.356729	-0.277895	-0.376107	0.0384518	-0.200648	-0.144739	-0.145681	-0.0635346	0.396697	0.0098476	-0.474165	-0.0230526	-0.186479	0.0689226	-0.368791	0.074378	0.0045902	-0.353783	0.0587104	-0.119111	0.0371526	-0.0863496	-0.455629	0.044556	-0.441535	0.470125	-0.183286	0.268781	-0.0241898	0.040937	0.216813	-0.270119	-0.0415064	0.47004	0.0305706	-0.202498	-0.506057	0.0991494	-0.28307	0.142889	0.0049726
AGPAT3	21	q22.3	ENST00000291572 // UTR-3 // 0 // Hs.248785 // AGPAT3 // 56894 // 1-acylglycerol-3-phosphate O-acyltransferase 3	0.0606846	0.0615073	0.442548	0.0942879	-0.00193035	0.152886	0.368811	-0.299576	-0.059722	-0.176292	-0.326349	-0.136314	0.376773	-0.338885	0.223637	-0.230274	-0.17791	0.142512	0.0911877	-0.0775815	-0.0185271	-0.242735	-0.00889429	-0.345891	0.220807	-0.0306993	0.128728	-0.0564615	-0.105637	-0.278144	-0.0395473	0.522327	0.0809096	0.0166041	-0.289409	0.503337	-0.0516415	-0.233026	-0.0145715	-0.019504	-0.193371
AGPAT4	6	q26	ENST00000320285 // Hs.353175 // AGPAT4 // 56895 // 1-acylglycerol-3-phosphate O-acyltransferase 4 (lysophosphatidic acid acyltransferase, delta)	-0.214786	-0.208431	-0.271749	-0.440946	-0.140654	-0.348189	-0.333972	-0.776692	-0.0752252	0.128125	-0.300947	-0.51828	-0.0908237	-0.372376	-0.424467	-0.109734	-0.217673	-0.459458	-0.382626	-0.0755857	0.352127	-0.558551	-0.314478	-0.335101	-0.408161	-0.0597038	-0.230915	0.573075	-0.503752	-0.282566	0.517459	-0.194984	-0.395895	-0.023486	-0.341171	-0.209957	-0.36886	-0.238476	-0.101412	0.464703	-0.424886
AGPAT5	8	p23.1	ENST00000285518 // Hs.624002 // AGPAT5 // 55326 // 1-acylglycerol-3-phosphate O-acyltransferase 5 (lysophosphatidic acid acyltransferase, epsilon)	0.0869016	0.0198452	-0.104368	0.107008	0.0487659	-0.346251	-0.829046	-0.417899	-0.665974	-0.743254	0.277481	-1.07281	0.332261	-0.293822	-0.393885	-0.781355	0.119668	-0.429646	0.135653	-0.0787767	-0.17677	-0.411755	0.109696	-0.373327	-0.441627	-0.644559	-0.188905	-0.43789	-1.0368	0.062042	-0.552593	0.00172076	0.0966642	-0.657522	-0.308171	-0.0314899	0.0487977	0.205886	-0.000707952	-0.56174	-0.714683
AGPAT6	8	p11.21	ENST00000396987 // Hs.355753 // AGPAT6 // 137964 // 1-acylglycerol-3-phosphate O-acyltransferase 6 (lysophosphatidic acid acyltransferase, zeta)	0.264626	0.0700252	0.297443	0.0551674	0.299828	-0.0954484	-0.248648	0.186224	0.285007	-0.719864	1.04863	0.173111	-0.0801272	0.133138	0.486112	-0.726936	-0.208721	0.491191	0.0547412	0.0594083	-0.19918	0.223771	0.918592	0.14761	0.514012	0.269949	-0.0496696	-0.511783	0.231516	-0.368587	-0.632188	0.384152	0.0410561	0.0621325	0.137457	0.347942	1.02858	-0.224694	0.250965	-0.537725	0.106587
AGPAT9	4	q21.23	ENST00000264409 // Hs.99196 // AGPAT9 // 84803 // 1-acylglycerol-3-phosphate O-acyltransferase 9	-0.293158	-0.283281	-0.265964	-0.439398	-0.350228	-0.391613	-0.333204	0.146011	-0.151635	-0.631983	-0.0425646	-0.0643392	-0.137727	0.0248816	0.0773394	-0.734969	-0.223589	0.0720179	-0.454794	-0.022664	-0.0317506	0.147161	-0.0328416	0.10751	0.0824836	-0.141206	-0.280813	-0.0996031	-0.0635329	-0.312861	-0.0889401	-0.302453	-0.405933	-0.267164	0.0236734	-0.291738	-0.0160622	-0.327511	-0.330924	-0.0779724	-0.113488
AGPS	2	q31.2	ENST00000264167 // Hs.516543 // AGPS // 8540 // alkylglycerone phosphate synthase	0.389046	0.353521	-0.187215	-0.231525	0.272069	-0.0473675	-0.0568122	-0.233217	0.184627	0.0177772	-0.305352	-0.244072	0.0269094	0.314208	0.0613865	0.0352706	0.0127353	0.0543648	-0.0215832	-0.0252381	-0.0227425	-0.0542054	-0.295171	0.115321	0.0431358	0.179993	-0.133913	-0.00877499	-0.272385	0.0185578	-0.039077	0.0253346	0.0471629	0.220803	0.294052	-0.0695276	-0.329922	0.051646	0.30851	-0.0344714	-0.185352
AGR2	7	p21.1	ENST00000412973 // Hs.530009 // AGR2 // 10551 // anterior gradient 2 homolog (Xenopus laevis)	-0.309133	0.0278515	-0.191266	0.116274	-0.289803	-0.359513	-0.281546	-0.246728	-0.0705429	0.0879838	0.00559644	0.0019983	0.135612	-0.469448	0.0845705	0.0839765	0.0336456	0.0638049	0.124325	0.0264077	0.184983	-0.0282853	-0.0258437	-0.3743	0.0966508	-0.051055	-0.23601	0.460424	-0.0386969	0.0402738	0.444857	-0.262231	0.136501	0.0226135	-0.394444	-0.249909	-0.00964333	0.0500381	-0.215076	0.386844	-0.0380562
AGR3	7	p21.1	ENST00000310398 // Hs.100686 // AGR3 // 155465 // anterior gradient 3 homolog (Xenopus laevis)	-0.20454	0.0221613	-0.174664	0.132125	-0.286836	-0.312882	-0.300281	-0.176656	-0.0441032	0.0991051	0.0323518	-0.0201074	0.124594	-0.386352	0.166026	0.100643	0.0392396	0.107838	0.144803	0.0167967	-0.00325911	-0.00133111	0.0167322	-0.372132	0.146062	-0.0614927	-0.204062	0.372102	-0.0204495	0.0205419	0.373215	-0.165639	0.144395	0.0713635	-0.362292	-0.186394	0.0012256	0.0785323	-0.19033	0.351062	0.0105137
AGRN	1	p36.33	ENST00000379370 // Hs.273330 // AGRN // 375790 // agrin	-0.2719	-0.305461	0.0171839	0.314458	-0.0708131	-0.0639448	-0.222601	0.399356	0.276603	0.530276	0.062105	0.0553668	0.270909	0.167257	0.48652	0.647772	0.161983	0.327044	0.388965	0.143168	-0.0224434	0.366853	0.0689065	0.139969	0.531214	0.298549	-0.0452399	0.0335871	0.0972195	0.182576	0.0793941	-0.0185467	0.302638	0.0628154	0.212129	-0.0492802	0.0391456	0.279704	-0.0395172	0.0225525	0.101102
AGRP	16	q22.1	ENST00000290953 // Hs.104633 // AGRP // 181 // agouti related protein homolog (mouse)	-0.2738	-0.199616	0.156793	0.0602542	-0.310003	-0.725362	-0.815284	-0.300549	-0.0643512	-0.256088	-0.638884	-0.308985	-0.0623599	-0.382167	-0.292299	-0.249528	-0.264822	-0.331133	0.0533794	-0.136573	-0.0046495	-0.203179	-0.587789	-0.330327	-0.256374	-0.148311	-0.480683	-0.100523	-0.410776	-0.292532	-0.0482491	0.147301	0.048944	-0.0910497	-0.337253	0.0626906	-0.522623	-0.207055	-0.344589	-0.0601363	-0.281514
AGT	1	q42.2	ENST00000366667 // Hs.19383 // AGT // 183 // angiotensinogen (serpin peptidase inhibitor, clade A, member 8)	0.389717	0.321605	-0.0938954	-0.496991	0.2809	-0.0374601	-0.0644421	-0.397158	-0.0788842	-0.0674745	-0.0233814	-0.0709251	0.123172	-0.392095	-0.415684	-0.0868478	0.0949688	-0.403897	-0.478455	-0.141951	-0.0425321	-0.45168	0.0614318	-0.381641	-0.385132	-0.0902226	-0.050257	-0.122384	-0.0394473	0.0384528	-0.0572106	0.230109	-0.465286	-0.129166	-0.443728	0.158641	0.0181221	0.12389	0.245111	-0.0637783	-0.0434356
AGTPBP1	9	q21.33	ENST00000337006 // Hs.719980 // AGTPBP1 // 23287 // ATP/GTP binding protein 1	-0.282036	-0.264979	-0.28695	-0.454515	-0.312938	0.225581	0.354015	0.0354305	-0.0963876	-0.196006	0.154871	0.194256	-0.152382	0.0101039	0.0939095	-0.22525	0.220272	0.0832624	-0.384441	-0.000499353	-0.175615	0.139513	0.171279	-0.217904	0.0819362	-0.0997191	0.234122	-0.619998	0.113721	0.273231	-0.568746	-0.342227	-0.385617	-0.213461	0.0302678	-0.629899	0.0689367	0.249572	-0.294207	-0.499349	0.0377307
AGTR1	3	q24	ENST00000349243 // Hs.477887 // AGTR1 // 185 // angiotensin II receptor, type 1	0.0842347	0.0796819	0.624936	0.318672	-0.160973	0.806574	0.791005	0.691981	0.532671	0.367894	0.200204	0.315796	0.537631	0.602889	0.469652	0.358185	0.280917	0.466957	0.333664	0.224132	0.111932	0.742915	0.323677	0.665415	0.466134	0.532836	0.617816	0.468192	0.323599	0.380474	0.433026	0.706986	0.341758	0.353469	0.628817	0.651564	0.281486	0.364704	-0.19332	0.368612	0.203654
AGTR2	X	q23	ENST00000371906 // Hs.405348 // AGTR2 // 186 // angiotensin II receptor, type 2	-0.814685	-0.753421	-0.367543	0.184215	-0.858308	-0.358057	-0.326668	-0.0768083	-0.0383706	0.132881	0.245502	-0.0169765	0.127437	0.0498758	0.51967	0.0932191	0.287791	0.485775	0.187062	-0.00679328	-0.041883	0.0632726	0.199473	-0.357689	0.471252	-0.0219573	-0.251866	-0.0146429	0.0467225	0.259686	-0.0162545	-0.114477	0.187968	-0.576267	0.0740098	-0.173224	0.223711	0.33356	-0.76577	-0.0207713	0.228012
AGXT	2	q37.3	ENST00000307503 // Hs.144567 // AGXT // 189 // alanine-glyoxylate aminotransferase	0.0124808	0.0188208	0.102554	-0.431467	-0.074752	-0.472428	-0.408823	-0.207911	0.22692	-0.239999	-0.351098	-0.457801	0.182282	0.0825615	-0.299361	-0.742593	-0.512049	-0.341562	-0.346666	-0.0277028	0.070548	-0.219009	-0.296161	-0.374366	-0.337342	0.234002	-0.279105	0.299579	-0.466092	-0.705132	0.275538	0.171245	-0.412355	0.428998	0.0911593	0.122438	-0.337378	-0.602413	-0.153205	0.282911	-0.317318
AGXT2	5	p13.2	ENST00000231420 // Hs.34494 // AGXT2 // 64902 // alanine--glyoxylate aminotransferase 2	0.0646121	-0.00819803	0.60984	0.10868	-0.00349655	0.204699	0.000988435	-0.195737	0.671745	0.0987197	0.399356	0.24975	0.230172	0.0662814	0.120645	0.0935898	0.540737	0.147703	0.122774	0.00951016	0.101077	-0.127146	0.312184	0.100853	0.138542	0.638009	0.0815834	0.469829	0.141324	0.507289	0.44267	0.701325	0.0982392	0.345116	0.075028	0.674259	0.384133	0.542548	0.00221532	0.403351	-0.0508546
AHCTF1	1	q44	ENST00000326225 // Hs.300887 // AHCTF1 // 25909 // AT hook containing transcription factor 1	0.38892	0.364105	0.0756591	0.0346404	0.309576	-0.0962564	-0.0608585	-0.327923	0.012638	0.0718094	0.0785464	0.0142948	0.0915228	-0.375515	-0.312844	0.0582121	0.0318644	-0.155814	0.0414862	-0.116168	0.0983386	-0.335669	0.178379	-0.345903	-0.320879	-0.0488592	-0.0973156	0.246463	0.0368614	-0.0190247	0.24562	0.355541	0.048156	0.0472421	-0.297361	0.287552	0.0713077	0.0195447	0.290974	0.230921	-0.00611695
AHCY	20	q11.22	ENST00000538132 // Hs.388004 // AHCY // 191 // adenosylhomocysteinase	0.197073	0.18806	-0.0271181	-0.0121056	-0.0112835	0.202511	0.225947	0.251815	0.602311	-0.457219	0.187937	0.046305	0.339685	0.280006	0.186173	-0.444085	0.0539441	0.165356	0.0426779	0.000460063	0.163247	0.213255	0.257236	0.443317	0.224681	0.603328	0.279585	0.512811	0.0237432	-0.0295541	0.350936	0.320273	0.0644122	0.379601	0.3224	0.047724	0.147339	-0.0348663	0.114372	0.32851	0.029816
AHCYL1	1	p13.3	ENST00000369799 // Hs.485365 // AHCYL1 // 10768 // adenosylhomocysteinase-like 1	-0.287932	-0.245082	-0.131922	0.123978	-0.0647081	-0.0337604	0.00623764	0.260793	0.303885	0.177535	0.0758839	0.0459087	0.000676321	-0.409889	0.246025	0.130424	0.114661	0.209279	0.114306	0.0761088	-0.181357	0.272421	0.0714652	-0.397567	0.280557	0.314048	0.0650811	-0.659595	0.0819216	0.168347	-0.646778	0.127078	0.0977397	0.0596611	-0.378261	0.155358	0.0884516	0.253813	-0.0121365	-0.638913	0.0309836
AHCYL2	7	q32.1	ENST00000325006 // Hs.600789 // AHCYL2 // 23382 // adenosylhomocysteinase-like 2	0.175386	-0.306932	0.248046	0.0592992	0.222713	0.171149	0.344083	0.0548358	-0.100162	0.111716	0.00733585	0.0152234	0.0696959	-0.414972	0.467047	0.0597042	0.174632	0.436045	0.0650115	-0.00936834	-0.0248742	0.132508	-0.0280863	-0.361076	0.417572	-0.119403	0.087204	-0.0675551	0.00481351	0.0722928	-0.0500775	0.0891692	0.0771753	0.00171287	-0.340572	0.0929857	-0.0614771	0.0714023	0.235267	-0.0276507	0.0125243
AHDC1	1	p36.11	ENST00000247087 // Hs.469280 // AHDC1 // 27245 // AT hook, DNA binding motif, containing 1	-0.291449	-0.327046	0.0860275	-0.284455	-0.119651	0.152308	0.119786	0.133314	-0.39836	-0.235342	0.0667921	0.0268562	0.232828	0.103186	0.240503	-0.180561	-0.171597	0.226644	0.109806	0.0125321	-0.0715578	0.0986512	0.0735688	0.119362	0.232806	-0.352277	0.0721576	-0.00252268	0.0761592	-0.213129	-0.0357328	-0.248528	0.0622785	-0.174405	0.0548337	-0.121832	0.040113	-0.17447	-0.0698599	-0.0401285	0.0262946
AHI1	6	q23.3	ENST00000265602 // Hs.386684 // AHI1 // 54806 // Abelson helper integration site 1	-0.254156	-0.240707	-0.254277	-0.40442	-0.184944	-0.0303365	0.184542	-0.00345646	-0.097239	0.188476	-0.336983	-0.638805	-0.144398	0.077602	-0.0304101	0.0577794	0.535594	-0.0866786	-0.375217	-0.0175175	0.043763	0.0779015	-0.291693	0.110381	-0.0729035	-0.0978992	0.0207588	0.255418	-0.61201	0.592402	0.219157	-0.229502	-0.361552	-0.150865	0.0431831	-0.26419	-0.328093	0.600746	-0.138546	0.212746	-0.519739
AHNAK	11	q12.3	ENST00000244934 // Hs.502756 // AHNAK // 79026 // AHNAK nucleoprotein	-0.288894	-0.260473	0.347003	-0.459823	-0.0445898	0.0897216	-0.0629173	-0.321918	-0.0894507	0.355988	0.0557413	-0.158177	-0.0473834	0.0956777	-0.251232	0.338877	0.0546535	-0.270401	-0.451726	-0.089478	0.0518689	-0.31346	0.0334918	0.0840766	-0.264388	-0.0823709	-0.0396967	0.304035	-0.135524	0.0741495	0.290841	0.312582	-0.437967	0.0148535	0.0800204	0.273511	0.0206657	0.0194607	-0.0653119	0.266762	-0.143169
AHNAK2	14	q32.33	ENST00000333244 // Hs.441783 // AHNAK2 // 113146 // AHNAK nucleoprotein 2	0.262353	0.194571	0.198292	0.370614	0.20605	0.174287	0.236803	-0.0501967	0.371444	0.103047	0.0358991	-0.00260556	-0.0460554	0.144234	0.299617	0.0938633	0.205264	0.270345	0.22861	0.0708687	0.0121151	0.0717695	0.0497644	0.228765	0.263636	0.390938	0.141854	-0.039968	0.0685797	0.278829	-0.0306624	0.530022	0.28237	0.0879415	0.168191	0.355171	0.176368	0.297733	0.155675	-0.012166	0.0860552
AHR	7	p21.1	ENST00000242057 // Hs.171189 // AHR // 196 // aryl hydrocarbon receptor	-0.176886	0.146063	-0.234105	0.0863724	-0.267269	-0.319412	-0.361649	-0.198087	0.0288039	0.107922	-0.0147818	0.0075509	0.231155	-0.321723	0.182975	0.0839831	0.154076	0.116641	0.0970393	-0.0156521	0.176846	-0.013964	-0.0213673	-0.286633	0.143095	-0.0269679	-0.270516	0.579359	-0.0311913	0.177839	0.496044	-0.192444	0.132492	0.0686402	-0.316065	-0.207792	-0.0469202	0.2064	-0.226592	0.470825	0.0596481
AHRR	5	p15.33	ENST00000316418 //--- // AHRR // 57491 // aryl-hydrocarbon receptor repressor	0.0403931	0.0234789	0.334463	0.072429	-0.0510507	0.12118	-0.0594355	0.421781	0.623412	0.170187	0.514486	0.219398	0.152012	0.450417	0.471255	0.157999	0.450817	0.505273	0.0739345	0.208464	-0.103436	0.521008	0.376019	0.477187	0.528927	0.596219	0.228545	-0.439909	0.177458	0.438074	-0.406366	0.354941	0.0847968	0.35994	0.444323	0.388881	0.357847	0.519666	-0.0399864	-0.393352	0.219525
AHSA1	14	q24.3	ENST00000216479 // Hs.204041 // AHSA1 // 10598 // AHA1, activator of heat shock 90kDa protein ATPase homolog 1 (yeast)	0.0509027	0.04811	0.48929	-0.0115589	-0.0423072	-0.376445	-0.353412	-0.202972	0.309669	0.0136344	-0.0391444	0.0409824	0.279486	0.0403214	-0.357034	-0.149261	0.268108	-0.362395	0.0330245	0.008048	-0.0155139	0.0586688	-0.0563451	0.0124522	-0.340996	0.302738	-0.258398	-0.166404	0.0589185	0.297586	-0.087835	0.650114	0.0640469	0.000469458	0.0377292	0.540682	-0.0125635	0.231559	-0.0601644	-0.0916042	0.0442608
AHSA2	2	p15	ENST00000357022 // Hs.655602 // AHSA2 // 130872 // AHA1, activator of heat shock 90kDa protein ATPase homolog 2 (yeast)	0.256743	0.276096	0.45132	0.461382	0.168595	-0.0214775	-0.0310686	0.0276158	-0.151804	0.49629	0.195329	0.0154694	0.139109	-0.0126015	0.153408	0.456895	0.0414783	0.100631	0.409378	0.0420735	-0.0633938	-0.0652053	0.243006	0.165742	0.161363	-0.110194	-0.0980627	-0.146423	-0.0146208	-0.00510938	-0.034348	0.452228	0.426661	-0.00510481	0.0216348	0.496312	0.241827	-0.0306136	0.270102	-0.0462683	0.0414638
AHSG	3	q27.3	ENST00000273784 // UTR-3 // 0 // Hs.324746 // AHSG // 197 // alpha-2-HS-glycoprotein	0.371431	0.192978	0.625761	0.262183	0.202615	0.315947	0.316863	0.623374	0.518316	0.369678	0.260005	0.608424	0.350008	0.559787	0.448267	0.421257	0.249958	0.409815	0.243456	0.163114	0.101208	0.725876	0.335677	0.514451	0.413059	0.519605	0.202539	0.471892	0.635284	0.287924	0.451675	0.646526	0.258243	0.371223	0.560359	0.663374	0.285975	0.2682	0.157693	0.401623	0.516035
AHSP	16	p11.2	ENST00000302312 // Hs.274309 // AHSP // 51327 // alpha hemoglobin stabilizing protein	0.288133	0.230093	0.270845	0.0723474	0.348892	-0.051155	0.0316284	0.258163	-0.0487814	-0.26915	-0.297683	0.0660169	-0.124173	0.124136	0.205943	-0.322569	0.077482	0.161563	0.0187601	0.0726551	0.113417	0.32415	-0.312769	0.14195	0.199016	-0.0558809	-0.058857	0.330215	0.0658486	0.0487447	0.280734	0.437733	0.0508556	-0.252243	0.156283	0.34116	-0.328075	0.0123161	0.262497	0.250605	0.0666542
AICDA	12	p13.31	ENST00000229335 // Hs.149342 // AICDA // 57379 // activation-induced cytidine deaminase	0.279379	0.361695	0.308817	-0.384704	0.279042	-0.344215	-0.358779	-0.361161	-0.079359	0.762118	0.4393	0.0320008	-0.254206	-0.311022	-0.342805	0.770758	0.0350133	-0.414365	-0.360174	-0.039529	0.00762159	-0.385937	0.42883	0.185821	-0.3364	-0.07044	-0.28141	-0.0134942	-0.0211481	0.0261831	0.00665287	0.33416	-0.328432	-0.168663	-0.300574	0.323853	0.315634	0.0088825	0.304409	0.023933	0.000539188
AIDA	1	q41	ENST00000340020 // Hs.156625 // AIDA // 64853 // axin interactor, dorsalization associated	0.418611	0.429484	0.0608712	-0.453301	0.333897	-0.050293	-0.0996469	-0.323099	0.00139944	-0.134937	-0.0266607	-0.00262912	0.0914741	0.105679	-0.330049	-0.263808	0.0641026	-0.347121	-0.389454	-0.130954	-0.0594659	-0.340692	0.174754	0.14707	-0.333983	-0.036988	-0.073704	-0.0859636	-0.00129156	0.0469825	-0.023358	0.351248	-0.394144	0.0304192	0.100567	0.286847	0.069261	0.0862454	0.367495	-0.0303271	-0.0408529
AIF1	6	p21.33	ENST00000376049 // Hs.76364 // AIF1 // 199 // allograft inflammatory factor 1	-0.365422	-0.317808	-0.06624	0.363366	-0.14973	-0.004276	-0.102691	0.0560773	0.307102	-0.007435	-0.30503	-0.008645	-0.0748217	-0.0649423	-0.301708	0.126606	0.108915	-0.25633	0.365736	-0.0287003	0.0671773	-0.025418	-0.216089	0.000276667	-0.336488	0.337211	-0.208053	0.186605	-0.0891287	0.0397773	0.37767	-0.212733	0.283733	0.306789	0.11622	-0.113197	-0.303017	-0.0494243	-0.0812893	0.333356	-0.00241433
AIFM1	X	q26.1	ENST00000287295 // Hs.424932 // AIFM1 // 9131 // apoptosis-inducing factor, mitochondrion-associated, 1	-0.848743	-0.722465	-0.42542	0.0894415	-0.969501	-0.362329	-0.324687	-0.0988475	-0.126201	-0.775583	0.245311	0.024779	0.138907	0.0583457	0.55042	-0.883859	0.242372	0.505804	0.0499065	0.0500699	-0.0610946	0.0724813	0.194932	-0.410613	0.480602	-0.0754723	-0.237473	-0.137353	0.140515	0.190639	-0.0511552	-0.0748288	0.056518	-0.656988	0.12975	-0.124895	0.195393	0.24369	-0.847166	-0.0950143	0.242306
AIFM2	10	q22.1	ENST00000373248 // Hs.650680 // AIFM2 // 84883 // apoptosis-inducing factor, mitochondrion-associated, 2	0.184649	0.16261	-0.179824	0.122889	0.19698	0.166484	0.195889	0.173736	-0.00760744	-0.173546	0.280151	-0.165614	0.139842	0.0904948	-0.290043	-0.121656	-0.157324	-0.281559	0.0896327	0.0317536	-0.0446942	0.236153	0.20303	0.218046	-0.315814	-0.0696709	0.0122418	-0.0331852	-0.150938	-0.251153	-0.0107648	-0.165827	-0.0240115	0.00457317	0.0778199	-0.0517033	0.197986	-0.184117	0.0951562	-0.063835	-0.0946849
AIFM3	22	q11.21	ENST00000333607 // Hs.723246 // AIFM3 // 150209 // apoptosis-inducing factor, mitochondrion-associated, 3	0.0975381	0.0541576	-0.346645	0.029391	0.155928	-0.208719	-0.12825	0.125597	-0.323246	0.0644684	0.0652427	-0.565823	-0.156816	-0.606477	0.118965	-0.0257728	-0.0833097	0.046125	0.054867	-0.199281	-0.246707	0.118018	0.0216776	-0.320284	0.0604323	-0.217117	-0.323498	-0.321189	-0.648001	-0.0399342	-0.270363	-0.220921	-0.052814	-0.284582	-0.601904	-0.38101	-0.288218	-0.039547	0.161721	-0.153024	-0.557798
AIG1	6	q24.2	ENST00000275235 // Hs.567501 // AIG1 // 51390 // androgen-induced 1	-0.279815	-0.259581	-0.259086	-0.416804	-0.184563	-0.00844791	0.215059	0.0122199	-0.0772584	0.0456771	-0.351016	-0.596699	-0.0883164	0.0803103	-0.397312	-0.169772	0.638104	-0.428255	-0.371804	0.0103986	0.040761	0.0925269	-0.293683	0.152467	-0.378762	-0.0793565	0.0610635	0.290141	-0.577815	0.692796	0.242407	-0.222612	-0.366092	-0.169431	0.0874595	-0.233626	-0.329613	0.710271	-0.137838	0.229167	-0.479367
AIM1	6	q21	ENST00000285105 // Hs.643590 // AIM1 // 202 // absent in melanoma 1	-0.238538	-0.233521	-0.2517	-0.392437	-0.14125	-0.00721287	0.214528	-0.349001	-0.0965055	0.209963	-0.294309	-0.588029	-0.0902494	0.0434001	0.0943363	0.0793558	-0.205085	0.0956781	-0.343378	-0.0704553	-0.179409	-0.315501	-0.296979	0.10828	0.101332	-0.0904544	0.0480846	-0.587535	-0.591176	-0.288129	-0.558969	-0.272536	-0.385314	0.120535	0.0342568	-0.258378	-0.343946	-0.256704	-0.135615	-0.496848	-0.476008
AIM1L	1	p36.11	ENST00000308182 // Hs.128738 // AIM1L // 55057 // absent in melanoma 1-like	-0.315887	-0.322616	0.0481146	-0.38961	-0.13183	0.175015	0.0652672	0.0884242	-0.439027	-0.191405	0.0809286	0.0153504	0.146597	0.0847384	0.087835	-0.371635	-0.212718	0.0999776	0.0787344	0.012674	0.00699	0.0529522	0.097017	0.0976082	0.174939	-0.385654	0.124758	-0.137784	0.0079216	-0.333007	0.0345364	-0.114072	0.0366586	-0.1304	-0.000364	-0.0934142	0.0152836	-0.28526	-0.168184	-0.0173484	0.0264988
AIM2	1	q23.1	ENST00000368129 // Hs.733411 // AIM2 // 9447 // absent in melanoma 2	0.327176	0.298017	0.017442	0.142587	0.219788	-0.0325396	-0.0251083	0.273507	0.236925	0.137772	0.0111881	0.0126252	0.45542	0.0532764	0.409695	0.0933504	0.0658918	0.417629	0.102674	0.022456	0.195859	0.299001	-0.0245341	0.166826	0.421641	0.234163	-0.0648125	0.522249	0.00207759	0.0463397	0.539948	0.0892127	0.0929254	0.0384738	0.0604056	0.0731478	-0.0296627	0.0838504	0.245551	0.459123	0.0173745
AIMP1	4	q24	ENST00000394701 // Hs.591680 // AIMP1 // 9255 // aminoacyl tRNA synthetase complex-interacting multifunctional protein 1	-0.237201	-0.236352	0.123721	-0.451632	-0.254216	-0.316865	-0.331812	-0.29527	-0.0508893	-0.553768	0.057715	-0.0106195	-0.0864684	-0.3474	-0.356347	-0.633321	-0.132834	-0.381557	-0.397136	-0.116473	-0.0077213	-0.361055	-0.0193201	-0.359453	-0.399756	-0.0504915	-0.266069	-0.0744089	-0.00755467	-0.200267	-0.092969	0.088799	-0.406203	-0.22702	-0.272905	0.0721219	0.0417878	-0.230532	-0.287003	-0.0536096	-0.0205311
AIMP2	7	p22.1	ENST00000223029 // Hs.301613 // AIMP2 // 7965 // aminoacyl tRNA synthetase complex-interacting multifunctional protein 2	-0.32739	-0.0440143	0.125701	-0.662082	-0.314866	-0.503201	-0.38897	-0.320585	-0.292461	0.074318	-0.0470527	-0.00592333	-0.0217127	-0.646273	-0.508883	-0.114219	0.013082	-0.386298	-0.647645	0.0331623	0.169676	-0.143913	-0.00607633	-0.514843	-0.570118	-0.311998	-0.316779	0.470859	0.0170727	-0.0344287	0.468768	0.0559093	-0.651089	-0.196088	-0.290829	0.164493	-0.153223	-0.140779	-0.263969	0.448581	0.0313127
AIPL1	17	p13.2	ENST00000381129 // Hs.279887 // AIPL1 // 23746 // aryl hydrocarbon receptor interacting protein-like 1	0.227029	0.202604	-0.221888	-0.515209	0.386883	-0.0766976	-0.0269023	-0.366427	-0.0979027	-0.197642	-0.377804	-0.500821	-0.094068	-0.4781	-0.389708	-0.22256	-0.201392	-0.372727	-0.485679	-0.0996745	-0.0365315	-0.377047	-0.319426	-0.435847	-0.357972	-0.101833	-0.105896	-0.0686701	-0.479894	-0.298323	-0.0356219	-0.167922	-0.468111	-0.0724443	-0.390508	-0.187461	-0.3945	-0.260596	0.357704	-0.0615579	-0.401394
AIRE	21	q22.3	ENST00000530812 // exon // 0 // Hs.129829 // AIRE // 326 // autoimmune regulator	0.0131132	0.231697	0.364896	0.114373	0.0497277	0.117845	0.260253	-0.093216	-0.00905683	-0.179889	-0.110903	-0.0495635	0.318314	-0.140134	0.275353	-0.150254	-0.141119	0.28487	0.0233017	0.12772	0.0196102	-0.253597	-0.123422	-0.234588	0.27583	-0.0447853	0.00981483	0.058878	-0.000358333	-0.226493	0.0762553	0.436249	0.0802813	-0.0717128	-0.0976262	0.383427	-0.0207712	-0.0097085	0.0337193	-0.0506522	-0.109406
AJAP1	1	p36.32	ENST00000378191 // Hs.25924 // AJAP1 // 55966 // adherens junctions associated protein 1	-0.284253	-0.270079	-0.171771	0.472298	-0.0306824	0.302499	-0.0471021	0.372001	0.390759	0.742022	0.0826705	0.0745188	0.304633	0.159712	0.411397	0.799403	0.298298	0.122465	0.437985	0.0508085	-0.0262624	0.413425	0.0182657	0.161842	0.453542	0.423429	0.102195	0.00879762	0.0942154	0.379191	-0.0154585	-0.121908	0.430644	0.127595	0.0987846	-0.141634	0.0485508	0.373168	0.0222603	-0.0246536	0.0219645
AJUBA	14	q11.2	ENST00000262713 // Hs.655832 // AJUBA // 84962 // ajuba LIM protein	-0.522674	-0.434936	-0.283577	0.0394571	-0.432939	-0.0497514	-0.00912256	0.0585057	-0.0290362	0.280814	-0.0739681	-0.0489681	-0.14116	-0.0608517	0.159955	0.217155	-0.226375	0.0113953	0.101749	-0.116034	-0.123113	-0.0195867	-0.0380979	-0.0894443	0.0991487	0.047331	-0.100752	-0.16867	-0.0294444	-0.325411	-0.0436747	-0.157724	0.0377058	0.000474667	-0.105817	-0.251245	0.071333	-0.277553	-0.441607	-0.0678471	-0.0654158
AK1	9	q34.11	ENST00000223836 // Hs.175473 // AK1 // 203 // adenylate kinase 1	-0.293762	-0.256954	0.252725	-0.516966	-0.376779	0.0561476	0.153234	0.346746	-0.0584305	-0.302319	0.594695	0.206415	0.39184	0.44276	0.374597	-0.341915	0.452729	0.286527	-0.407643	0.0477718	0.107901	0.29014	0.371005	0.54646	0.283631	-0.0371616	0.101217	0.0266667	0.184342	0.433622	-0.0274534	0.335647	-0.445486	-0.182106	0.376609	0.158254	0.301281	0.369724	-0.460547	-0.0102922	0.102898
AK2	1	p35.1	ENST00000548559 // Hs.470907 // AK2 // 204 // adenylate kinase 2	-0.104988	-0.133911	-0.0986812	0.0731726	0.066574	-0.0433173	-0.0541771	0.132058	-0.118778	-0.209628	0.0612523	0.0532075	0.224669	0.0381349	0.220707	-0.171249	0.0356982	0.221359	0.0692156	0.0534198	0.171204	0.119659	0.0444457	0.0966684	0.222392	-0.0707622	-0.0541977	0.550261	0.00883372	0.068304	0.508938	-0.16073	0.026588	-0.156473	0.0556674	-0.0575017	-0.00765278	0.017627	0.0361871	0.444434	-0.013858
AK3	9	p24.1	ENST00000359883 // Hs.732022 // AK3 // 50808 // adenylate kinase 3	-0.0528045	-0.0816768	-0.0230722	-0.406099	-0.0683847	-0.127287	0.0891173	0.286289	-0.199157	-0.674833	0.308253	-0.283287	-0.132129	-0.19009	0.311078	-0.742253	-0.0722199	0.248934	-0.453005	0.0594601	-0.076045	0.36766	0.156663	-0.129449	0.279213	-0.131328	-0.0517209	-0.599913	-0.282152	-0.0609137	-0.515603	0.00641094	-0.453391	-0.266723	-0.0784032	-0.0811867	0.0962992	-0.0802205	-0.0876612	-0.493157	-0.168303
AK5	1	p31.1	ENST00000317704 // Hs.559718 // AK5 // 26289 // adenylate kinase 5	-0.260288	-0.270516	-0.135357	0.0993791	-0.0369579	-0.0445972	-0.0524453	0.031519	-0.0937616	0.0769827	-0.0297361	-0.000332275	-0.0951038	-0.416929	0.107342	0.0792258	0.0263769	0.105928	0.110573	-0.0222411	-0.0578731	0.0681438	-0.041581	-0.365529	0.114292	-0.0948536	-0.0633507	-0.0773378	-0.0191964	0.0353467	-0.0577361	0.0917431	0.0909019	-0.171861	-0.370525	0.0766297	-0.0575395	0.0233372	-0.0056048	-0.0583673	-0.0390277
AK7	14	q32.2	ENST00000267584 // Hs.667462 // AK7 // 122481 // adenylate kinase 7	0.243857	0.1925	0.158849	0.0138368	0.244543	0.127292	0.148624	-0.151559	0.295921	-0.187228	-0.316936	0.00965616	0.0938579	0.00473551	-0.401185	-0.282875	0.211973	-0.356163	0.0711195	0.0218703	0.0117986	-0.0478031	-0.263387	0.0728538	-0.349873	0.305878	0.050356	-0.0782027	-0.0132565	0.254877	-0.0180048	0.45213	0.0449911	0.0294729	0.0571953	0.293387	-0.150411	0.182157	0.189672	-0.0162576	0.0412235
AK8	9	q34.13	ENST00000298545 // Hs.421340 // AK8 // 158067 // adenylate kinase 8	-0.247552	-0.241926	0.323203	-0.998724	-0.407328	0.143146	0.194147	0.361596	-0.0882134	-0.198256	0.460126	0.216939	-0.114929	0.488527	0.185073	-0.251927	0.276876	0.154644	-0.610557	0.0191374	-0.0176336	0.31728	0.256202	0.451804	0.206512	-0.0653914	0.0951355	-0.0731248	0.206678	0.296735	-0.0732332	0.344249	-0.476974	-0.197779	0.438736	0.237579	0.189301	0.260832	-0.359024	-0.0389963	0.0707437
AKAP1	17	q22	ENST00000337714 // Hs.463506 // AKAP1 // 8165 // A kinase (PRKA) anchor protein 1	0.14845	0.10035	0.355738	-0.564912	0.170528	0.39766	0.228653	0.224381	0.539695	-0.168296	0.0480728	0.0534769	0.524024	0.0808166	-0.458979	-0.0366536	0.0680156	-0.471121	-0.544377	0.0949313	-0.0129699	0.176497	0.0554375	0.149808	-0.403711	0.574099	0.241892	-0.00920281	0.0402464	0.107085	-0.0317399	0.361255	-0.426328	-0.108734	0.111459	0.366669	0.128659	0.0638407	0.266609	0.00353907	0.034487
AKAP10	17	p11.2	ENST00000225737 // Hs.740428 // AKAP10 // 11216 // A kinase (PRKA) anchor protein 10	-0.292564	-0.280113	-0.194128	-0.48757	-0.335034	-0.382972	-0.348805	-0.068958	-0.151594	0.0789617	-0.314431	-0.5027	-0.0950901	-0.491558	-0.37624	0.0735757	0.0316667	-0.350236	-0.469451	-0.123928	-0.0109569	-0.226388	-0.306147	-0.421445	-0.356281	-0.135614	-0.298512	-0.107538	-0.499715	0.00810003	-0.0742027	-0.186445	-0.44308	-0.0852312	-0.386291	-0.203147	-0.343528	-0.0542365	-0.282286	-0.0425586	-0.394852
AKAP11	13	q14.11	ENST00000025301 // Hs.105105 // AKAP11 // 11215 // A kinase (PRKA) anchor protein 11	-0.241428	-0.253804	0.72206	-0.381033	-0.280908	-0.32639	-0.3181	-0.358994	0.259575	-0.611139	-0.3083	-0.00384913	-0.366582	-0.229044	-0.40917	-0.598917	0.267881	-0.448723	-0.355133	-0.0978178	-0.0337047	-0.418343	-0.293216	-0.31963	-0.359926	0.253612	-0.251494	0.00997227	0.0188598	0.0527325	-0.0116928	0.48871	-0.324769	0.0293477	-0.0852104	0.453026	-0.310517	0.196757	-0.322209	-0.0220284	0.00999237
AKAP12	6	q25.1	ENST00000253332 // Hs.371240 // AKAP12 // 9590 // A kinase (PRKA) anchor protein 12	-0.207912	-0.184646	-0.22269	0.0749614	-0.116579	-0.328604	-0.314486	-0.731802	-0.0872198	0.112427	-0.323782	-0.514655	-0.0723837	-0.438645	-0.353382	-0.201547	-0.167134	-0.387637	0.0835608	-0.065134	0.0873981	-0.560222	-0.304607	-0.351205	-0.386134	-0.0942778	-0.224237	0.264133	-0.514203	-0.285977	0.267079	-0.19807	0.111065	-0.157311	-0.313138	-0.197801	-0.375199	-0.312881	-0.0854997	0.253424	-0.391134
AKAP13	15	q25.3	ENST00000361243 // Hs.459211 // AKAP13 // 11214 // A kinase (PRKA) anchor protein 13	0.0444831	0.0174281	-0.265999	0.599507	0.0389277	-0.406422	-0.381928	0.0545783	-0.00781038	-0.185468	-0.328325	0.022383	-0.370711	0.0903217	0.130717	-0.218438	0.0459875	0.0986665	0.54593	0.182456	0.143852	0.281119	-0.338971	0.159963	0.108332	-0.0160045	-0.291256	0.519637	0.0246258	0.0924587	0.484357	-0.225673	0.540409	-0.111752	0.0692833	-0.249126	-0.337297	0.0942729	0.0849793	0.452435	0.184153
AKAP14	X	q24	ENST00000371423 // Hs.592245 // AKAP14 // 158798 // A kinase (PRKA) anchor protein 14	-0.783464	-0.692605	-0.31829	0.0641355	-0.851056	-0.336328	-0.310209	-0.0461086	-0.151319	0.1845	0.28627	0.00339204	0.061283	-0.0232387	0.505015	0.0599689	0.160952	0.523255	0.0371873	0.0233211	-0.0375168	0.0633905	0.269506	-0.403811	0.506918	-0.120794	-0.208867	-0.120885	0.102203	0.108341	-0.0269826	-0.106326	0.0689429	-0.640079	0.115044	-0.120754	0.237702	0.117371	-0.76834	-0.0346954	0.268998
AKAP17A	X	p22.33	ENST00000313871 // Hs.522572 // AKAP17A // 8227 // A kinase (PRKA) anchor protein 17A	-0.731479	-0.647899	-0.624843	0.126857	-0.883315	-0.450955	-0.34012	0.289976	-0.0954922	-0.708017	0.286777	-0.489949	-0.140998	-0.419981	-0.4642	-0.852164	-0.00834089	-0.352664	0.140851	0.0630761	-0.209159	0.464939	0.333626	-0.387026	-0.410702	-0.122265	-0.165458	-0.666078	-0.487491	0.0590141	-0.569897	-0.580895	0.09904	-0.493471	-0.32163	-0.677251	0.285922	0.0137387	-0.707797	-0.531338	-0.427032
AKAP2	9	q31.3	ENST00000302798 // Hs.591908 // AKAP2 // 11217 // A kinase (PRKA) anchor protein 2	-0.293103	-0.298592	0.298534	-0.431956	-0.357653	0.160371	0.176125	0.326174	-0.0918697	-0.182843	0.431982	0.196989	-0.120887	0.0741324	0.172095	-0.222341	0.268862	0.134272	-0.406683	0.0130137	-0.0779748	0.274665	0.226615	-0.164635	0.141625	-0.0821071	0.11988	-0.264786	0.178943	0.341327	-0.252361	0.292169	-0.388646	-0.215546	0.0928999	0.180288	0.182547	0.327029	-0.352588	-0.228307	0.0647213
AKAP3	12	p13.32	ENST00000228850 // Hs.98397 // AKAP3 // 10566 // A kinase (PRKA) anchor protein 3	0.251978	0.293086	-0.222728	-0.421043	0.235371	-0.358506	-0.389866	-0.383235	-0.092355	0.311853	0.24557	-0.027794	-0.31053	-0.437184	0.109089	0.370673	-0.261324	0.0326224	-0.346623	-0.0942245	-0.00211809	-0.368772	0.255021	-0.0225957	0.12606	-0.0703021	-0.309801	0.00277868	-0.106976	-0.27805	0.0178507	-0.0318481	-0.384349	-0.173683	-0.475154	-0.0504719	0.188963	-0.21097	0.28149	-0.0153012	-0.0720698
AKAP4	X	p11.22	ENST00000358526 // Hs.97633 // AKAP4 // 8852 // A kinase (PRKA) anchor protein 4	-0.215883	-0.121534	-0.496399	0.24395	-0.169813	-0.336046	-0.264796	0.0614907	0.0192805	-0.119584	0.321681	-0.55915	0.231203	-0.343861	0.175927	-0.136556	1.32604	0.17731	0.209658	0.123289	-0.168654	0.169866	0.222111	-0.334916	0.18816	-0.0526443	-0.104805	-0.469227	-0.481646	1.43568	-0.479795	-0.0126322	0.221293	-0.579209	-0.285531	-0.145398	0.344232	1.32989	-0.231348	-0.433403	-0.444273
AKAP6	14	q12	ENST00000280979 // Hs.509083 // AKAP6 // 9472 // A kinase (PRKA) anchor protein 6	-0.243109	-0.22933	-0.179342	0.101743	-0.291989	0.0143762	-0.00204054	0.0254238	0.247702	0.0632121	-0.00501135	0.00645729	-0.0920388	0.104612	0.117326	0.0154882	-0.47992	0.104612	0.111748	0.000893446	-0.116124	-0.0216836	-0.00554288	0.151698	0.0979989	0.250516	-0.00259017	-0.557503	-0.00177225	-0.642718	-0.512449	-0.196366	0.0929662	0.026324	0.0956871	-0.209954	-0.0639793	-0.592569	-0.314693	-0.466363	0.0108283
AKAP7	6	q23.2	ENST00000263050 // Hs.486483 // AKAP7 // 9465 // A kinase (PRKA) anchor protein 7	-0.223873	-0.197883	-0.259928	-0.414106	-0.12237	-0.0212473	0.195793	0.0252669	-0.0779387	0.218701	-0.323977	-0.633248	-0.116349	0.0439156	0.106432	0.134032	0.539118	0.0970989	-0.396783	0.0177827	0.0510729	0.0816337	-0.321768	0.104539	0.0836114	-0.0663997	0.0900695	0.267214	-0.61149	0.58222	0.229007	-0.215197	-0.376326	-0.123569	0.0715427	-0.2167	-0.369196	0.588407	-0.0882624	0.233254	-0.494179
AKAP8	19	p13.12	ENST00000269701 // Hs.594496 // AKAP8 // 10270 // A kinase (PRKA) anchor protein 8	0.118188	-0.0988245	-0.26773	0.0330596	0.124027	0.0376574	0.0980076	0.158888	-0.206508	0.0025646	0.0941881	0.281489	0.107242	0.0468498	0.206982	0.0107092	-0.032688	0.250618	-0.0270369	-0.0460979	0.036503	0.156094	0.0912563	0.0388547	0.227137	-0.201285	-0.0087806	-0.142518	0.324038	-0.0565603	-0.104134	-0.247936	0.0473486	-0.24476	0.107435	-0.309265	0.0796771	-0.0221181	0.052246	-0.0215063	0.296632
AKAP8L	19	p13.12	ENST00000397410 // Hs.399800 // AKAP8L // 26993 // A kinase (PRKA) anchor protein 8-like	0.179221	-0.0176846	-0.268554	0.0633873	0.156713	0.0877171	0.19707	0.125984	-0.182274	0.0457909	-0.0142853	0.309823	0.304039	0.120959	0.22867	-0.0200645	0.036004	0.204145	0.00226895	-0.0218834	-0.0646287	0.255383	0.0168138	0.0771315	0.218077	-0.128647	-0.0241781	-0.146477	0.386405	-0.0161892	-0.147004	-0.23206	-0.0302724	-0.25675	0.0277202	-0.25197	-0.0471403	-0.00441595	0.0640115	-0.0942326	0.321306
AKAP9	7	q21.2	ENST00000356239 // UTR-3 // 0 // Hs.651221 // AKAP9 // 10142 // A kinase (PRKA) anchor protein (yotiao) 9	0.223408	-0.216916	0.391936	-0.40687	0.26375	0.168572	0.182538	0.0664502	-0.125233	0.408545	-0.0370157	-0.0223183	0.0938984	0.0377554	0.123059	0.387579	0.209813	0.0879102	-0.36052	0.0105419	-0.0371532	0.138981	-0.0434836	0.111535	0.0983747	-0.12503	0.09637	-0.0823393	-0.0401997	0.17961	-0.073372	0.374754	-0.345239	0.0480518	0.0614682	0.391193	-0.082513	0.137354	0.284933	-0.0356674	-0.0105339
AKIP1	11	p15.4	ENST00000299576 // Hs.131180 // AKIP1 // 56672 // A kinase (PRKA) interacting protein 1	-0.216943	-0.286071	-0.192687	-0.518588	-0.346246	-0.442168	-0.358649	-0.404272	-0.11142	-0.289652	0.0406261	-0.216725	0.0778717	-0.516967	-0.306707	-0.408574	-0.220986	-0.307173	-0.513087	-0.132826	-0.159017	-0.415524	0.0211266	-0.437297	-0.368873	-0.114822	-0.316077	-0.689103	-0.22242	-0.279031	-0.624417	-0.205294	-0.510767	0.0223857	-0.432078	-0.191954	-0.0263932	-0.302201	-0.327415	-0.583742	-0.217124
AKIRIN1	1	p34.3	ENST00000372975 // Hs.293563 // AKIRIN1 // 79647 // akirin 1	-0.344792	-0.357985	-0.202975	0.0310247	-0.165517	0.182749	0.168095	0.0702682	-0.099874	-0.149603	0.0797329	0.0289875	0.171818	-0.0448955	0.173911	-0.219476	-0.261011	0.0446103	-0.001969	0.031718	0.114878	0.05359	0.0804322	0.052971	0.0733232	-0.120969	0.0811349	0.401088	0.000474077	-0.391418	0.432173	-0.165851	0.0788788	-0.158347	0.0119393	-0.0202108	0.00117777	-0.32082	-0.158065	0.384363	0.0113119
AKIRIN2	6	q15	ENST00000257787 // Hs.485915 // AKIRIN2 // 55122 // akirin 2	-0.17255	-0.171229	-0.25069	0.135711	-0.101451	-0.0810935	0.177399	-0.274506	-0.190308	0.0368925	-0.398038	-0.045769	-0.117815	0.0159428	0.426776	-0.238757	0.0104704	0.385059	-0.0352692	-0.071781	-0.0675998	-0.35341	-0.332328	0.0794099	0.406529	-0.14581	0.0341872	-0.116617	-0.0110228	-0.157911	-0.104554	-0.262056	0.0921469	-0.0719858	0.027675	-0.23493	-0.428231	-0.224439	-0.0829086	-0.129824	-0.0498886
AKNA	9	q32	ENST00000223791 // Hs.494895 // AKNA // 80709 // AT-hook transcription factor	-0.181158	-0.183222	0.349565	-0.43459	-0.281463	0.180832	0.227056	0.38571	0.0127251	-0.136522	0.547345	0.246054	-0.0419213	0.10499	0.263927	-0.156776	0.314098	0.231107	-0.457877	0.0633569	0.0245812	0.366679	0.371991	0.225736	0.277633	0.0181435	0.184013	0.0652236	0.241577	0.375464	0.086505	0.372808	-0.37686	-0.120205	0.100639	0.263609	0.272866	0.39146	-0.308082	0.0277806	0.194116
AKNAD1	1	p13.3	ENST00000357393 // Hs.740704 // AKNAD1 // 254268 // AKNA domain containing 1	-0.232229	-0.212544	-0.055023	0.146761	0.0830406	0.0572099	-0.0238116	0.250947	0.2257	0.146511	0.258374	0.0588981	-0.0225741	-0.412536	0.188917	0.0849697	0.0847095	0.19652	0.127554	0.0748486	-0.179027	0.224659	0.00184859	-0.369677	0.203395	0.219062	0.0545398	-0.586218	0.0376283	0.0701321	-0.508717	0.140378	0.153993	-0.00549312	-0.314187	0.157443	0.0344466	0.039643	0.0478403	-0.508237	0.0340187
AKR1A1	1	p34.1	ENST00000372070 // Hs.474584 // AKR1A1 // 10327 // aldo-keto reductase family 1, member A1 (aldehyde reductase)	-0.418989	-0.370104	-0.126091	0.0120544	-0.138448	0.114086	0.123479	-0.0166558	-0.161245	-0.330236	-0.0297163	-0.0527342	0.161447	-0.11342	0.101329	-0.366492	-0.0197152	0.13603	0.0566581	-0.0382807	0.00611364	-0.0373886	-0.0530683	-0.0470213	0.0858107	-0.137946	0.0297269	0.204107	-0.016211	-0.0266314	0.196944	-0.0441571	0.0189975	-0.222223	-0.0686291	0.0071348	-0.0317892	-0.127359	-0.0298028	0.221506	-0.0464351
AKR1B1	7	q33	ENST00000285930 // Hs.521212 // AKR1B1 // 231 // aldo-keto reductase family 1, member B1 (aldose reductase)	0.216062	-0.212477	0.299908	0.104842	0.265245	0.174389	0.350357	0.0184858	-0.0785982	0.147863	-0.00979386	0.0374864	0.122807	-0.450512	0.459837	0.127709	0.226811	0.503308	0.0791048	-0.00872389	-0.0146509	0.129669	-0.0460952	-0.392379	0.443249	-0.0465564	0.0915751	-0.011447	0.0252707	0.103462	0.0514505	0.160583	0.0635921	0.0385529	-0.410925	0.118305	-0.0464635	0.144866	0.352917	0.00712439	0.00850611
AKR1B10	7	q33	ENST00000359579 // Hs.116724 // AKR1B10 // 57016 // aldo-keto reductase family 1, member B10 (aldose reductase)	0.21459	-0.297776	0.257521	0.0615126	0.202879	0.164144	0.361409	0.0486975	-0.053315	0.0997249	-0.0102014	0.000491352	0.200571	-0.406626	0.466983	0.104188	0.177814	0.494192	0.0748561	0.00515367	-0.0496627	0.15685	-0.0664	-0.361011	0.428841	-0.0610536	0.0883497	-0.0314627	-0.0430771	0.0597187	-0.0133837	0.126208	0.0908406	0.0312624	-0.359274	0.111977	-0.0775775	0.0932316	0.27564	-0.0165706	-0.0218774
AKR1B15	7	q33	ENST00000423958 // Hs.729418 // AKR1B15 // 441282 // aldo-keto reductase family 1, member B15	0.229359	-0.214982	0.306571	0.157116	0.272125	0.23178	0.383774	0.12308	-0.0267748	0.162752	-0.0162237	0.0268768	0.302232	-0.386391	0.536982	0.140514	0.260364	0.496757	0.140046	0.0468627	-0.0252555	0.248286	-0.0634884	-0.353425	0.459013	-0.0246518	0.137124	0.00280538	0.0197854	0.125555	0.00159631	0.131374	0.0912388	0.03578	-0.305004	0.13838	-0.0279622	0.179307	0.289584	0.0181485	0.00069631
AKR1C1	10	p15.1	ENST00000434459 // Hs.460260 // AKR1C1 // 1645 // aldo-keto reductase family 1, member C1 (dihydrodiol dehydrogenase 1; 20-alpha (3-alpha)-hydroxysteroid dehydrogenase)	0.00756031	-0.0127599	0.543393	-0.368287	0.0145695	0.24092	0.378513	0.121685	-0.0344427	-0.185539	0.0295772	-0.231643	0.402765	-0.34644	0.363442	-0.242914	-0.186976	0.235162	-0.431694	-0.00492593	-0.109606	0.170226	0.138185	-0.187798	0.368155	-0.0485777	0.108409	-0.0500003	-0.23027	-0.268458	-0.0798247	0.274836	-0.415262	-0.0540846	-0.372755	0.39398	0.0735308	-0.23848	-0.156253	-0.0674721	-0.0269794
AKR1C2	10	p15.1	ENST00000407674 // Hs.567256 // AKR1C2 // 1646 // aldo-keto reductase family 1, member C2 (dihydrodiol dehydrogenase 2; bile acid binding protein; 3-alpha hydroxysteroid dehydrog	0.0387422	-0.000295162	0.586687	-0.315309	0.0181546	0.225053	0.378	0.164181	-0.042842	-0.177656	-0.00133708	-0.21391	0.482007	-0.337076	0.321477	-0.209394	-0.204088	0.218313	-0.343701	0.0295409	-0.0842668	0.211692	0.115965	-0.227082	0.355935	-0.0275519	0.129218	-0.00757541	-0.220029	-0.238297	-0.0224543	0.321622	-0.327893	-0.0588711	-0.371521	0.427378	0.0506248	-0.19664	-0.0479161	-0.0624191	-0.0361752
AKR1C3	10	p15.1	ENST00000380554 // Hs.78183 // AKR1C3 // 8644 // aldo-keto reductase family 1, member C3 (3-alpha hydroxysteroid dehydrogenase, type II)	-0.00225475	-0.016668	0.547998	-0.375894	-0.0130664	0.197623	0.338915	0.185072	-0.0714183	-0.218111	0.027161	-0.206018	0.390479	-0.314593	0.402868	-0.211216	-0.205348	0.294373	-0.320479	0.00946314	-0.0692472	0.17221	0.155323	-0.193496	0.393849	-0.0951823	0.0776777	-0.015912	-0.174861	-0.274911	-0.0228281	0.290326	-0.395253	-0.122934	-0.321557	0.40734	0.115488	-0.245053	-0.134667	-0.0208526	0.0166035
AKR1C4	10	p15.1	ENST00000380448 // Hs.567245 // AKR1C4 // 1109 // aldo-keto reductase family 1, member C4 (chlordecone reductase; 3-alpha hydroxysteroid dehydrogenase, type I; dihydrodiol dehydr	0.0582368	0.0739527	0.541481	-0.344935	-0.0188204	0.173171	0.278623	0.175632	-0.0825431	-0.240456	-0.06829	-0.309984	0.407839	-0.362257	0.424237	-0.268002	-0.228434	0.281643	-0.441466	-0.00944014	-0.0719793	0.20455	0.155343	-0.269958	0.397824	-0.169734	0.0751611	-0.0836374	-0.306886	-0.327563	-0.106916	0.362274	-0.398723	-0.10505	-0.414325	0.450765	0.0430178	-0.295107	-0.0884259	-0.028243	-0.0425127
AKR1D1	7	q33	ENST00000242375 // Hs.201667 // AKR1D1 // 6718 // aldo-keto reductase family 1, member D1 (delta 4-3-ketosteroid-5-beta-reductase)	0.190413	-0.257531	0.292563	0.089963	0.231859	0.155909	0.368055	0.0455205	-0.113373	0.13674	-0.00948338	0.00059555	0.12409	-0.449396	0.368203	0.0706039	0.163705	0.393257	0.0972884	-0.00017073	-0.0061755	0.168575	-0.0142772	-0.390576	0.393189	-0.126208	0.113272	-0.0780718	-0.0166196	0.0475862	-0.051395	0.101234	0.0615156	0.0227721	-0.420284	0.119292	-0.0345947	0.0703243	0.283764	-0.0645576	0.016941
AKR1E2	10	p15.1	ENST00000298375 // Hs.657944 // AKR1E2 // 83592 // aldo-keto reductase family 1, member E2	0.027901	0.027788	0.617629	-0.360204	0.0912417	0.275031	0.439382	0.243057	-0.058293	-0.154244	0.00397369	-0.22402	0.43789	-0.341108	0.424	-0.195936	-0.178511	0.259472	-0.347334	0.0198321	0.111268	0.206524	0.141349	-0.183997	0.402121	-0.0693488	0.132734	0.489457	-0.210541	-0.280762	0.486708	0.350181	-0.382324	-0.0828933	-0.319988	0.474619	0.0873155	-0.224457	-0.0421416	0.427246	0.0543335
AKR7A2	1	p36.13	ENST00000235835 // Hs.571886 // AKR7A2 // 8574 // aldo-keto reductase family 7, member A2 (aflatoxin aldehyde reductase)	0.0508691	0.0693092	0.0860256	0.127433	0.187445	0.323186	0.185064	0.14396	0.419177	-0.074601	0.0899706	0.0718117	0.314942	0.0954234	0.244932	-0.0671114	-0.190102	0.179722	0.0978311	0.0142994	-0.0460771	0.107103	0.0726543	0.247077	0.214535	0.335865	0.0878068	-0.12717	0.0746028	-0.256387	-0.00234162	-0.111513	0.0995582	0.122168	0.112265	0.0304736	0.0728984	-0.240697	0.21902	-0.00688725	0.0308643
AKT1	14	q32.33	ENST00000349310 // Hs.525622 // AKT1 // 207 // v-akt murine thymoma viral oncogene homolog 1	0.225952	0.19276	0.196018	0.422214	0.190521	0.203698	0.234344	-0.0427547	0.352864	0.175285	0.146432	0.0493324	0.111201	0.194607	0.279144	0.190424	0.331015	0.354388	0.335742	0.0886727	0.104907	0.0966937	0.140082	0.283598	0.323376	0.38381	0.0915431	0.134912	0.0884626	0.356381	0.0220769	0.630473	0.332452	0.124968	0.0964573	0.474736	0.255135	0.374147	0.252209	-0.0386884	0.018744
AKT1S1	19	q13.33	ENST00000344175 // Hs.515542 // AKT1S1 // 84335 // AKT1 substrate 1 (proline-rich)	0.302092	0.191202	0.134808	0.108924	0.253487	0.143776	0.19559	-0.354401	0.155899	-0.249321	0.140437	0.0905415	0.315917	-0.423262	-0.220482	-0.305673	0.168737	-0.175344	0.183588	0.018465	-0.0447005	-0.229241	-0.15905	-0.285376	-0.160617	0.211221	0.0253995	0.113465	0.151103	0.100186	0.167173	0.171719	0.134791	0.0534735	-0.396526	0.249112	-0.13358	0.098638	0.182744	0.025795	0.121456
AKT2	19	q13.2	ENST00000358335 // Hs.631535 // AKT2 // 208 // v-akt murine thymoma viral oncogene homolog 2	0.13419	0.167267	-0.0705486	0.032453	0.15197	0.115521	0.171093	0.201078	1.16025	0.0882828	0.0215785	0.0454386	0.13412	0.0147578	0.210593	0.0804493	0.373823	-0.327413	0.0475933	0.00788883	-0.0166939	0.199934	0.0337432	0.1004	-0.00828331	1.22293	0.041852	-0.118112	0.0667458	0.434351	-0.0384532	0.301719	0.00659735	1.00685	-0.0192956	0.306978	-0.0621311	0.421322	0.108796	-0.0460823	-0.0393932
AKT3	1	q44	ENST00000263826 // Hs.498292 // AKT3 // 10000 // v-akt murine thymoma viral oncogene homolog 3 (protein kinase B, gamma)	0.408411	0.394106	0.0404294	0.0905108	0.325269	-0.0671925	-0.0576624	-0.388572	-0.0412979	0.0737172	-0.0170948	-0.0291722	0.0582515	-0.469023	-0.429234	0.0338606	0.0165833	-0.221085	0.0858276	-0.148617	0.0524019	-0.394482	0.145177	-0.425899	-0.426631	-0.0580546	-0.0843828	0.258177	-0.0273385	-0.00428565	0.243479	0.34047	0.0791705	0.0160313	-0.436591	0.248823	0.0363121	0.0409004	0.326949	0.231131	-0.067613
AKTIP	16	q12.2	ENST00000300245 // Hs.380897 // AKTIP // 64400 // AKT interacting protein	-0.240946	-0.192306	0.259049	0.0886895	-0.276281	0.0188001	0.0356245	-0.384357	-0.0809471	-0.151991	-0.921984	-0.00642233	-0.435649	0.0465478	0.440407	-0.199403	-0.192803	0.0127707	0.117567	-0.0980428	0.0034604	-0.354378	-0.793177	0.132773	0.404691	-0.0981273	-0.0451148	-0.0639175	-0.0677853	-0.288725	-0.0283273	0.0994819	0.0375682	-0.22885	0.0142075	0.0795098	-0.910292	-0.280518	-0.302513	-0.0223301	-0.0412757
ALAD	9	q32	ENST00000409155 // UTR-3 // 0 // Hs.1227 // ALAD // 210 // aminolevulinate dehydratase	-0.31667	-0.34725	0.198339	-0.660463	-0.49141	0.155794	0.178123	0.296585	-0.201424	-0.267435	0.377671	0.188665	-0.198386	-0.0492436	0.0415719	-0.287324	0.200053	0.0868329	-0.591868	-0.00342111	-0.0179656	0.22959	0.122381	0.121659	-0.0300083	-0.145283	0.0297362	-0.147239	0.140224	0.281625	-0.217989	0.122298	-0.649098	-0.373387	0.0490741	0.154935	0.103374	0.143556	-0.466903	-0.145769	0.0310366
ALAS1	3	p21.2	ENST00000310271 // Hs.476308 // ALAS1 // 211 // aminolevulinate, delta-, synthase 1	-0.0099093	-0.0278857	-0.112698	-0.356589	0.0174516	-0.0026672	0.0181622	0.226049	-0.0368193	-0.133245	0.354454	0.193104	0.18624	0.200037	0.359703	-0.182496	-0.211101	0.342548	-0.328974	-0.0019421	0.0242283	0.216835	0.460137	0.167164	0.272346	-0.0791959	-0.120751	-0.0713221	0.207232	-0.243739	0.0162618	-0.151065	-0.296937	-0.193335	0.270064	-0.101041	0.228655	-0.187173	0.02883	-0.0670349	0.284823
ALAS2	X	p11.21	ENST00000330807 // Hs.522666 // ALAS2 // 212 // aminolevulinate, delta-, synthase 2	-0.186978	-0.201552	-0.449928	0.242992	-0.271733	-0.306467	-0.306659	0.0419846	-0.0445802	-0.127245	0.26587	-0.58959	0.10651	-0.348529	0.154001	-0.169538	0.71684	0.156957	0.212198	0.0237605	-0.106311	0.123802	0.209464	-0.278087	0.114013	-0.0557943	-0.252625	-0.550324	-0.4762	0.799984	-0.46725	-0.079307	0.187269	-0.451993	-0.286881	-0.0578771	0.233175	0.741806	-0.161754	-0.479435	-0.212725
ALB	4	q13.3	ENST00000441319 // Hs.418167 // ALB // 213 // albumin	0.0683781	0.0528106	-0.139117	-0.373297	0.0676122	-0.310225	-0.259215	0.242831	-0.0693097	-0.134129	0.0537948	0.0211236	-0.0706481	0.0992954	0.196501	-0.189451	-0.146184	0.179449	-0.354946	0.0355881	0.00319927	0.242329	0.0466729	0.122846	0.192197	-0.0342604	-0.19617	-0.0059048	0.0226287	-0.191112	-0.0383655	-0.13269	-0.335102	-0.203744	0.101257	-0.161453	0.0731073	-0.189527	0.0588958	-0.031917	-0.0141406
ALCAM	3	q13.11	ENST00000306107 // Hs.591293 // ALCAM // 214 // activated leukocyte cell adhesion molecule	0.0558713	0.0458428	0.228053	0.0480296	-0.211456	-0.058835	-0.0339718	0.201054	0.453616	0.236595	0.231743	0.311559	0.506311	0.07513	0.115188	0.255327	0.254195	0.0854472	0.048312	0.0592922	0.0679621	0.356441	0.344722	0.136726	0.0946918	0.438416	-0.0954299	0.271665	0.315546	0.31701	0.244331	0.280987	0.0464816	0.195388	0.0451107	0.189584	0.275762	0.28679	-0.234508	0.223903	0.113197
ALDH16A1	19	q13.33	ENST00000293350 // Hs.719998 // ALDH16A1 // 126133 // aldehyde dehydrogenase 16 family, member A1	0.259143	0.26827	0.459676	0.103801	0.194987	0.204901	0.273654	0.223695	0.278391	0.290768	0.157309	0.0209807	0.332757	0.0604223	-0.329792	0.138298	0.103111	-0.261765	0.00156383	0.137437	0.0938158	0.263761	-0.0672415	0.0605572	-0.200973	0.350567	0.121424	0.432056	0.0612765	0.00153467	0.333663	0.495864	0.0312052	0.0845198	0.0996587	0.313497	-0.0494772	-0.0025445	0.196081	0.31196	0.00528
ALDH18A1	10	q24.1	ENST00000371221 // Hs.500645 // ALDH18A1 // 5832 // aldehyde dehydrogenase 18 family, member A1	0.259401	0.240469	0.345108	0.0976094	-0.0170527	-0.298152	-0.30703	-0.365264	-0.10755	0.0761349	-0.273856	-0.184044	0.12227	0.0300381	-0.310353	0.0873873	-0.208509	0.13011	0.0952719	-0.0779816	-0.0345092	-0.325699	0.0274075	0.200475	-0.253841	-0.105269	-0.253793	-0.0253466	-0.184489	-0.284401	0.00474892	0.365053	0.0791811	0.0541885	0.0206028	0.415193	-0.0574522	-0.288232	-0.117006	0.0448859	-0.138323
ALDH1A1	9	q21.13	ENST00000297785 // Hs.76392 // ALDH1A1 // 216 // aldehyde dehydrogenase 1 family, member A1	-0.268316	-0.260974	0.317046	0.113014	-0.327404	0.0333728	-0.000591904	0.187022	-0.0506142	-0.186414	0.398612	0.216094	-0.120549	0.0476296	0.190217	-0.196173	0.26044	0.159722	0.122172	0.00956029	-0.0325782	0.191982	0.250243	-0.182817	0.174374	-0.0354848	0.0693218	-0.0382527	0.199585	0.347361	-0.0599231	0.303082	0.0933239	-0.188392	0.0624903	0.165215	0.190698	0.361764	-0.321923	-0.0622966	0.0680209
ALDH1A2	15	q21.3	ENST00000558239 // Hs.643455 // ALDH1A2 // 8854 // aldehyde dehydrogenase 1 family, member A2	-0.262236	-0.281134	0.302892	-0.386393	-0.277034	-0.355437	-0.335502	-0.0960409	0.27303	-0.160769	-0.000336558	-0.211434	-0.358487	-0.224499	-0.426913	-0.185477	-0.199916	-0.465928	-0.347543	0.00192419	-0.0240533	0.0630314	-0.030632	-0.162072	-0.440124	0.290701	-0.281574	0.0152487	-0.198513	-0.259768	-0.0124174	0.358347	-0.346323	-0.0659899	-0.206737	0.363097	-0.116866	-0.223319	-0.226142	-0.0161346	0.0172652
ALDH1A3	15	q26.3	ENST00000558568 // Hs.459538 // ALDH1A3 // 220 // aldehyde dehydrogenase 1 family, member A3	-0.0166444	-0.0324675	-0.222174	0.558826	-0.132361	-0.352169	-0.392334	-0.0668305	-0.00384536	-0.219791	-0.349042	0.321041	-0.431579	0.0356839	0.166211	-0.180976	0.0404362	0.13989	0.622511	0.00657703	-0.0107356	0.0949721	-0.312567	0.136527	0.21945	-0.0571226	-0.129819	0.354498	0.377895	0.0889058	0.316808	-0.240132	0.549418	-0.13665	0.0339901	-0.237774	-0.327624	0.13286	-0.00912815	0.280359	0.422729
ALDH1B1	9	p13.2	ENST00000377698 // UTR-3 // 0 // Hs.436219 // ALDH1B1 // 219 // aldehyde dehydrogenase 1 family, member B1	0.049813	0.0417903	-0.152913	0.0903168	0.0418323	0.0352146	0.195436	0.237317	-0.0153719	-0.19784	0.464167	-0.125636	-0.0573833	0.0381715	0.14751	-0.151709	0.239334	0.123879	0.103263	0.0788352	-0.0103452	0.247835	0.225347	0.0663217	0.16855	-0.0159973	0.051357	0.0702418	-0.0804826	0.27689	0.0479804	-0.146809	0.0756005	-0.179877	0.0692036	-0.159684	0.22364	0.296425	0.0590443	0.020266	0.00126788
ALDH1L1	3	q21.3	ENST00000273450 // Hs.434435 // ALDH1L1 // 10840 // aldehyde dehydrogenase 1 family, member L1	0.00141939	-0.0151861	0.317918	0.386333	-0.260643	0.211037	0.384552	0.168668	0.624492	0.384554	0.263758	0.302678	0.368547	0.398504	0.423552	0.462832	0.271289	0.419344	0.399959	0.0582289	0.221395	0.308963	0.349805	0.424934	0.434875	0.574439	0.192554	0.570923	0.354464	0.324708	0.559882	0.299281	0.379381	0.365889	0.380889	0.2781	0.317344	0.378811	-0.228665	0.508764	0.219177
ALDH1L2	12	q23.3	ENST00000258494 // Hs.42572 // ALDH1L2 // 160428 // aldehyde dehydrogenase 1 family, member L2	-0.225717	-0.242962	-0.239617	0.18421	-0.267125	0.547172	0.558387	-0.00190531	0.208008	0.0657601	-0.00930186	-0.0275695	-0.0627083	-0.0145067	-0.348889	-0.00833731	-0.192829	-0.438088	0.134052	0.0194092	0.043186	0.00520959	0.0158651	0.040528	-0.354301	0.204296	0.334091	0.0121043	0.0112229	-0.237781	-0.0116245	-0.146963	0.129747	-0.136504	0.0495142	-0.178068	0.0770132	-0.209897	-0.256506	-0.0355207	-0.013375
ALDH2	12	q24.12	ENST00000261733 // Hs.604551 // ALDH2 // 217 // aldehyde dehydrogenase 2 family (mitochondrial)	-0.24228	-0.20424	-0.188594	0.0476923	-0.315335	0.182193	0.229768	0.0403931	0.192428	0.0846985	0.026233	0.0577479	-0.109363	-0.012706	-0.17777	-0.067053	0.0595715	-0.229731	0.0333325	-0.00955904	0.0635028	0.0164049	0.0311825	0.00881648	-0.198555	0.232202	0.0754382	-0.0762548	0.058032	-0.0200941	-0.0088455	-0.140331	0.0630651	-0.186472	0.0482347	-0.15357	0.0802111	-0.0235831	-0.280736	-0.0248798	0.030878
ALDH3A1	17	p11.2	ENST00000225740 // Hs.531682 // ALDH3A1 // 218 // aldehyde dehydrogenase 3 family, member A1	-0.349228	-0.268789	-0.220371	-0.581262	-0.383905	-0.43436	-0.431126	-0.0782787	-0.0944621	0.114239	-0.318526	-0.553809	-0.102765	-0.582075	-0.369499	0.0924141	0.125472	-0.425948	-0.578161	-0.201444	-0.0255336	-0.244926	-0.338005	-0.388503	-0.373756	-0.122371	-0.333775	-0.0351454	-0.581989	0.0598849	-0.0764842	-0.301791	-0.467153	-0.0961913	-0.417986	-0.218736	-0.371818	-0.0145833	-0.354655	-0.0218594	-0.462662
ALDH3A2	17	p11.2	ENST00000176643 // Hs.499886 // ALDH3A2 // 224 // aldehyde dehydrogenase 3 family, member A2	-0.381953	-0.330898	-0.165158	-0.617916	-0.441637	-0.406854	-0.389535	-0.0859176	-0.18346	0.0313414	-0.278624	-0.555086	-0.129875	-0.520377	-0.387045	0.0928751	0.0470856	-0.379344	-0.504309	-0.151787	-0.0555436	-0.249033	-0.326471	-0.462518	-0.358374	-0.18097	-0.345268	-0.0389644	-0.533136	0.0811386	-0.0768876	-0.202427	-0.544143	-0.123199	-0.406194	-0.195761	-0.406169	0.0694291	-0.386315	-0.0487594	-0.428628
ALDH3B2	11	q13.2	ENST00000349015 // Hs.87539 // ALDH3B2 // 222 // aldehyde dehydrogenase 3 family, member B2	-0.163582	-0.133467	0.325784	0.0971223	0.0379323	0.141158	0.0541327	-0.122409	0.0704212	0.149076	0.0832717	-0.0714661	-0.0453618	0.210206	0.300599	0.123391	0.145942	-0.14784	0.0970892	0.0393511	-0.0121834	-0.162924	0.0954517	0.216725	0.0641023	-0.0480087	0.0381492	-0.00468507	-0.00749827	0.193939	0.0806476	0.373354	0.069619	0.118224	0.13467	0.31843	0.132246	0.221223	-0.0114611	-0.00622967	-0.000470133
ALDH4A1	1	p36.13	ENST00000290597 // Hs.77448 // ALDH4A1 // 8659 // aldehyde dehydrogenase 4 family, member A1	-0.0105322	0.00389086	-0.0286163	0.0624297	0.1178	0.232507	0.059228	0.0601391	0.322562	-0.192415	-0.00137963	0.0443673	0.240544	0.0626433	0.137435	-0.199377	-0.209024	0.123133	0.0408678	0.00206569	-0.094895	0.0850942	0.00216317	0.11645	0.18563	0.35759	0.100038	-0.0130357	0.0553497	-0.232124	-0.0414387	-0.219255	0.00504574	0.137114	0.007767	-0.186964	0.0551652	-0.14772	0.105124	-0.0586321	0.00616929
ALDH5A1	6	p22.3	ENST00000348925 // Hs.371723 // ALDH5A1 // 7915 // aldehyde dehydrogenase 5 family, member A1	-0.222468	-0.240377	-0.185642	0.262536	-0.0388715	0.366136	0.350966	0.440275	0.478604	0.136242	-0.296898	0.00724521	-0.0959132	0.015413	-0.45345	0.144847	0.0883564	-0.4526	0.429444	0.170478	0.0696714	0.350299	-0.301657	0.13098	-0.389155	0.516619	0.175409	0.256215	0.0161474	0.104514	0.277637	-0.195433	0.423447	0.467796	0.0651883	-0.227497	-0.340464	0.0178022	-0.0659578	0.217832	0.0275197
ALDH6A1	14	q24.3	ENST00000350259 // Hs.293970 // ALDH6A1 // 4329 // aldehyde dehydrogenase 6 family, member A1	0.00937256	0.0268289	0.438356	0.35134	-0.0390953	-0.0837998	-0.106077	-0.192508	0.265331	0.052275	-0.042286	-0.00537331	0.0486107	-0.0153627	-0.338183	0.00151088	0.222433	-0.383239	0.257472	8.52e-05	-0.0323522	-0.15748	-0.0161749	0.0271016	-0.352278	0.366921	-0.0618344	-0.0769368	-0.00580631	0.216952	-0.0528777	0.561487	0.321399	0.016451	0.0534813	0.369178	-0.0200567	0.183142	0.0821542	-0.00810256	0.0349019
ALDH7A1	5	q23.2	ENST00000409134 // Hs.483239 // ALDH7A1 // 501 // aldehyde dehydrogenase 7 family, member A1	-0.257157	-0.290432	0.0792611	-0.449173	-0.292322	0.437742	0.552473	-0.0151448	0.106502	0.0983029	0.435352	0.0317732	-0.0794272	-0.471407	-0.33659	-0.0490981	-0.241987	-0.372933	-0.431335	-0.11593	0.0508559	-0.171443	0.355241	-0.388523	-0.376025	0.15501	0.318211	0.226096	-0.00242693	-0.333834	0.234172	0.134282	-0.380314	0.137896	-0.372577	0.121422	0.336846	-0.354362	-0.323434	0.2281	-0.0289898
ALDH8A1	6	q23.3	ENST00000265605 // Hs.486520 // ALDH8A1 // 64577 // aldehyde dehydrogenase 8 family, member A1	-0.203973	-0.175794	-0.27751	-0.396398	-0.0915278	0.0171332	0.222715	0.0635666	-0.0996129	0.267472	-0.295491	-0.601937	-0.127544	0.0710952	0.18079	0.119575	0.558484	0.0999191	-0.395801	0.0480038	0.0843996	0.139771	-0.274379	0.154644	0.142077	-0.055315	0.0835062	0.275892	-0.57375	0.581106	0.215571	-0.247705	-0.361018	-0.163606	0.0584821	-0.268085	-0.348804	0.606485	-0.106586	0.259199	-0.451881
ALDH9A1	1	q24.1	ENST00000354775 // Hs.2533 // ALDH9A1 // 223 // aldehyde dehydrogenase 9 family, member A1	0.226401	0.22054	0.0761152	-0.344833	0.247654	-0.029062	-0.0373646	0.236691	0.130284	0.102639	0.0692317	0.031278	0.386754	0.0678429	0.177406	0.050771	0.209885	0.156694	-0.329458	0.032527	0.178916	0.301063	0.0140461	0.128486	0.235848	0.101884	-0.050004	0.440718	0.0757368	-0.00804124	0.453379	0.208097	-0.324931	-0.0259371	0.0964493	0.0985403	-0.0448842	0.0679479	0.218823	0.350203	0.0434444
ALDOA	16	p11.2	ENST00000338110 // Hs.513490 // ALDOA // 226 // aldolase A, fructose-bisphosphate	-0.154933	-0.149892	0.127067	0.027667	-0.189496	-0.250909	-0.234566	0.0574744	-0.306166	-0.289138	-0.426984	-0.0223852	-0.144198	-0.0065254	0.133817	-0.468259	0.0513438	0.149308	-0.0448161	-0.0853697	-0.0454071	0.0977894	-0.295412	-0.0568569	0.126639	-0.257227	-0.290949	0.0692939	-0.082937	0.030588	0.0959325	0.261647	-0.0583662	-0.271141	-0.0422826	0.0924485	-0.37422	-0.0133473	-0.182447	0.130772	-0.0831416
ALDOB	9	q31.1	ENST00000374853 // Hs.530274 // ALDOB // 229 // aldolase B, fructose-bisphosphate	-0.198255	-0.171236	0.287325	-0.380877	-0.272413	0.204006	0.211786	0.227748	-0.0578568	-0.200687	0.189641	0.229222	-0.0851901	-0.0146378	0.10027	-0.218109	0.225571	0.104853	-0.33974	0.0512071	-0.0961914	0.220064	0.118409	-0.150523	0.098709	-0.0347948	0.169482	-0.529738	0.205983	0.271266	-0.481624	0.308747	-0.377927	-0.207669	0.0560862	0.143572	0.0638553	0.29068	-0.250275	-0.452592	0.0902836
ALG1	16	p13.3	ENST00000262374 // Hs.592086 // ALG1 // 56052 // asparagine-linked glycosylation 1, beta-1,4-mannosyltransferase homolog (S. cerevisiae)	0.0449217	0.0613989	-0.217087	0.220337	0.0806501	-0.0755908	0.125473	-0.274655	-0.0273055	-0.00618228	0.0405781	0.108885	0.00240944	0.0868717	-0.200125	-0.162817	0.0384591	-0.245114	0.0857482	0.00396006	-0.0551329	-0.202508	-0.037139	0.100876	-0.208438	-0.0531903	-0.001872	-0.00848511	0.0506363	0.0478102	-0.0104577	-0.107141	0.112549	-0.188657	0.153682	-0.158286	-0.00401117	0.0221948	0.118813	-0.0743989	0.112357
ALG10	12	p11.1	ENST00000266483 // Hs.730854 // ALG10 // 84920 // asparagine-linked glycosylation 10, alpha-1,2-glucosyltransferase homolog (S. pombe)	0.0318229	0.0740575	0.00743849	-0.367022	0.0315026	-0.147071	-0.144366	0.030079	-0.0240417	0.33921	0.235217	-0.0157133	0.122887	0.139908	-0.464546	0.371665	0.0649042	-0.477197	-0.32769	0.0180566	-0.0518276	-0.0178259	0.18138	0.125114	-0.429432	-0.00154253	-0.113519	-0.0238419	-0.00596084	0.0509558	0.0003414	0.0301202	-0.365395	-0.190462	0.0698934	0.0572966	0.243847	0.1103	0.0741789	-0.00928095	0.0584978
ALG11	13	q14.3	ENST00000519151 // Hs.512963 // ALG11 // 440138 // asparagine-linked glycosylation 11, alpha-1,2-mannosyltransferase homolog (yeast)	-0.258906	-0.201313	0.0285026	-0.424276	-0.370183	-0.357929	-0.356627	-0.352402	0.267339	-0.600209	-0.38469	-0.0130974	-0.429527	0.877569	-0.416222	-0.377129	-0.0371258	-0.442902	-0.42121	-0.131819	-0.00271519	-0.342919	-0.312141	0.870932	-0.320897	0.335935	-0.196199	0.010925	0.0443231	-0.802835	0.0138653	0.0122957	-0.442776	0.10164	0.825423	0.0292415	-0.316741	-0.547309	-0.261521	-0.0567191	0.0646566
ALG12	22	q13.33	ENST00000330817 // Hs.526711 // ALG12 // 79087 // asparagine-linked glycosylation 12, alpha-1,6-mannosyltransferase homolog (S. cerevisiae)	-0.210114	-0.205759	-0.220682	-0.416496	-0.0506073	-0.119663	-0.052455	-0.354536	-0.0616178	-0.0905943	-0.367493	-0.871723	-0.816929	-0.334359	-0.277781	0.00474095	-0.213097	-0.319775	-0.487786	-0.0871187	-0.178451	-0.328388	-0.00162158	-0.137307	-0.287965	-0.0799815	-0.0908772	-0.674402	-0.821552	-0.268857	-0.560189	-0.158526	-0.454561	-0.226581	-0.265661	-0.0243767	-0.0862436	-0.264353	0.0230081	-0.577939	-0.690471
ALG13	X	q23	ENST00000251943 // Hs.443061 // ALG13 // 79868 // asparagine-linked glycosylation 13 homolog (S. cerevisiae)	-0.796788	-0.744872	-0.414789	0.211589	-0.889209	-0.362599	-0.332527	-0.0811411	-0.0469752	0.140871	0.271229	0.0289823	0.10894	0.0434622	0.438995	0.144986	0.285835	0.520989	0.177353	0.0269444	0.00497717	0.0469993	0.185214	-0.389238	0.403081	-0.0430805	-0.23169	-0.0286893	0.0841499	0.230747	-0.00572536	-0.129079	0.172908	-0.573671	0.0838624	-0.179426	0.216961	0.298395	-0.793844	-0.0182897	0.275377
ALG14	1	p21.3	ENST00000370205 // Hs.408927 // ALG14 // 199857 // asparagine-linked glycosylation 14 homolog (S. cerevisiae)	-0.221214	-0.200829	-0.103142	0.113177	0.029412	-0.319699	-0.324272	0.00693451	-0.0347954	0.159619	-0.000634329	0.0424309	-0.0372861	-0.465204	0.127348	0.11899	0.0756035	0.1252	0.118872	0.0596335	0.00100702	0.0646614	0.0228448	-0.384546	0.128678	-0.0201812	-0.125426	-0.0700545	0.0483754	0.0737775	-0.000857906	0.169925	0.112297	-0.0819088	-0.384277	0.16199	0.0187901	0.0596756	0.0554093	-0.0282628	-0.00136097
ALG1L	3	q21.2	ENST00000340333 // Hs.591299 // ALG1L // 200810 // asparagine-linked glycosylation 1-like	-0.0137099	-0.0844333	0.380918	-0.197589	-0.389962	0.227005	0.40784	0.171596	0.263786	0.278196	0.0406495	0.10695	0.397062	0.388765	-0.171815	0.380445	0.302831	-0.162577	-0.24293	0.119504	0.241369	0.389873	0.187429	0.335418	-0.149413	0.252149	0.203871	0.684974	0.0905316	0.286911	0.64611	0.387304	-0.284672	0.119901	0.366268	0.356275	0.0640636	0.284394	-0.456045	0.532511	-0.0261051
ALG1L2	3	q22.1	ENST00000503500 // Hs.722197 // ALG1L2 // 644974 // Asparagine-linked glycosylation 1-like 2	0.040126	-0.0277927	0.219708	0.409635	0.0241543	0.645059	0.505756	0.139281	0.564132	0.455109	0.209703	0.269607	0.53787	0.485047	0.497462	0.400949	0.214367	0.475154	0.32116	0.0704409	0.0949959	0.380019	0.306321	0.417721	0.416364	0.552002	0.378085	0.544096	0.315557	0.297921	0.593725	0.280103	0.327579	0.274814	0.627297	0.28139	0.185413	0.195647	0.00975743	0.429136	0.243423
ALG2	9	q22.33	ENST00000238477 // UTR-3 // 0 // Hs.40919 // ALG2 // 85365 // asparagine-linked glycosylation 2, alpha-1,3-mannosyltransferase homolog (S. cerevisiae)	-0.20058	-0.222044	-0.214348	-0.40553	-0.310032	0.166813	0.139754	0.160431	-0.0239263	-0.215246	0.253952	0.216885	-0.0555192	0.026515	0.150509	-0.173429	0.280448	0.117735	-0.411024	0.0245536	-0.178967	0.172242	0.230942	-0.156214	0.189012	-0.0556649	0.110106	-0.578201	0.150349	0.350652	-0.555646	-0.248149	-0.382622	-0.190365	0.0878899	-0.585211	0.160338	0.361841	-0.297247	-0.47486	0.0584168
ALG5	13	q13.3	ENST00000239891 // Hs.507769 // ALG5 // 29880 // asparagine-linked glycosylation 5, dolichyl-phosphate beta-glucosyltransferase homolog (S. cerevisiae)	-0.270655	-0.254864	0.847397	0.0877861	-0.364215	-0.368438	-0.3373	-0.0033821	0.190838	-0.601433	-0.338015	-0.0649135	-0.423222	0.327858	-0.470338	-0.675232	0.253242	-0.484964	0.0763557	0.0172644	-0.0578705	0.0735966	-0.315875	0.41405	-0.450319	0.202188	-0.250259	-0.118594	-0.0521113	-0.0176994	-0.0878295	0.670625	0.0872033	0.00744929	0.407515	0.589346	-0.329745	0.024246	-0.345082	-0.0822693	-0.00826963
ALG6	1	p31.3	ENST00000263440 // Hs.258501 // ALG6 // 29929 // asparagine-linked glycosylation 6, alpha-1,3-glucosyltransferase homolog (S. cerevisiae)	-0.259326	-0.201668	-0.127269	0.153571	0.0440522	-0.0516792	-0.0673751	-0.00103465	-0.0871266	-0.205128	0.00392165	0.0255811	0.284266	-0.403982	0.138517	-0.164446	0.0347937	0.154944	0.110466	0.00395733	0.0927352	0.0724504	-0.0409129	-0.384089	0.106265	-0.0827366	-0.0971069	0.260289	0.00348984	0.0682042	0.25468	0.0893004	0.0931789	-0.151821	-0.324898	0.0933167	-0.0451021	0.0326352	0.0490639	0.2243	-0.00888351
ALG8	11	q14.1	ENST00000299626 // Hs.503368 // ALG8 // 79053 // asparagine-linked glycosylation 8, alpha-1,3-glucosyltransferase homolog (S. cerevisiae)	0.281687	0.287339	-0.296724	1.17726	0.426485	0.163162	-0.018119	-0.375281	-0.0134117	0.351157	-0.0186873	-0.227081	0.430832	0.0796274	0.169047	0.282806	-0.0159952	-0.385188	1.19282	-0.117628	-0.0704163	-0.409482	0.0013905	0.0482352	-0.130358	-0.0187398	0.00754119	-0.0671343	-0.264939	-0.0537748	-0.0933982	-0.264723	1.19899	0.00547238	0.0410317	-0.273761	-0.0521645	-0.0390665	0.380735	0.00665711	-0.183914
ALG9	11	q23.1	ENST00000398006 // Hs.730893 // ALG9 // 79796 // asparagine-linked glycosylation 9, alpha-1,2-mannosyltransferase homolog (S. cerevisiae)	-0.300833	-0.293584	-0.0451762	0.58109	-0.0206883	0.138184	-0.065546	-0.380467	-0.054335	0.492394	-0.00681143	-0.260083	-0.102557	-0.27846	0.47652	0.461622	0.0047638	0.095332	0.540482	-0.105251	-0.0741745	-0.399197	-0.00890115	-0.412792	0.233075	-0.0855686	-0.0303736	-0.097122	-0.244302	-0.0067749	-0.0683429	-0.214459	0.536726	-0.0250867	-0.354213	-0.24105	-0.0324768	-0.0485397	-0.0456433	-0.0474735	-0.24286
ALK	2	p23.1	ENST00000389048 // Hs.654469 // ALK // 238 // anaplastic lymphoma receptor tyrosine kinase	0.442205	0.403094	-0.111463	0.11493	0.10568	-0.0355747	-0.0171172	0.00488277	-0.037829	0.133179	0.305158	0.0584823	0.089542	0.234081	0.112139	0.156786	0.0697206	0.112621	0.137919	0.12164	-0.0126215	0.113995	0.266944	-0.0140759	0.130356	-0.0223969	-0.100669	0.0593995	0.0709058	0.102382	0.0436472	0.1292	0.0714018	0.0335687	0.0793962	0.12975	0.324336	0.122734	0.222486	0.0250512	0.0294561
ALKBH1	14	q24.3	ENST00000216489 // Hs.94542 // ALKBH1 // 8846 // alkB, alkylation repair homolog 1 (E. coli)	0.0436402	0.0751357	0.42405	-0.0067337	-0.0214892	-0.383966	-0.326813	-0.191974	0.326864	0.0986617	0.0225793	0.0396994	0.247807	0.0233378	-0.410038	-0.0329173	0.260238	-0.389233	0.0274155	0.0192775	0.015639	-0.00873635	0.0345217	0.0453773	-0.359229	0.337915	-0.262602	-0.112049	-0.019088	0.267449	-0.100213	0.641107	0.0218212	0.012474	0.0938998	0.48155	0.016835	0.193961	-0.0520518	-0.0581909	0.0123598
ALKBH2	12	q24.11	ENST00000343075 // Hs.374458 // ALKBH2 // 121642 // alkB, alkylation repair homolog 2 (E. coli)	-0.368817	-0.30872	-0.133305	0.0763758	-0.314176	0.401579	0.474753	-0.201917	0.165734	0.0576084	0.0419156	0.00900544	-0.155411	-0.0538876	-0.323109	-0.113745	-0.208904	-0.304924	-0.0207993	-0.00826244	-0.0347637	-0.2162	0.0701867	0.0136087	-0.403818	0.20293	0.148509	-0.0813662	0.00389556	-0.282542	-0.0681144	0.00517067	0.0947496	-0.174008	-0.144828	-0.216388	0.052231	-0.0921417	-0.337787	-0.129031	0.0203424
ALKBH3	11	p11.2	ENST00000302708 // Hs.720708 // ALKBH3 // 221120 // alkB, alkylation repair homolog 3 (E. coli)	-0.154908	-0.136525	-0.204728	-0.411311	-0.264297	0.470583	0.447	-0.338061	-0.053758	-0.140087	0.0583091	-0.195473	0.249165	0.162569	-0.343106	-0.131224	-0.227763	-0.403191	-0.364713	-0.0130153	0.0824245	-0.365485	-0.0227009	0.176813	-0.325519	-0.0779141	0.378628	0.363838	-0.157584	-0.32643	0.365359	-0.142662	-0.413644	0.0522632	0.150769	-0.164658	-0.00985958	-0.258607	-0.213928	0.296539	-0.132374
ALKBH4	7	q22.1	ENST00000292566 // Hs.658598 // ALKBH4 // 54784 // alkB, alkylation repair homolog 4 (E. coli)	0.237908	-0.210882	0.506153	-0.515445	0.16065	0.172339	0.320346	0.0874142	-0.146444	0.174623	0.110462	0.0767956	0.0880486	-0.347944	0.175106	0.0333524	0.247124	0.192677	-0.42882	0.118892	0.021183	0.354417	0.0112654	-0.437332	0.265926	-0.134646	0.112798	-0.0556858	0.0274394	0.21123	0.0541836	0.472301	-0.308477	-0.0367586	-0.307503	0.447593	0.116172	0.0757582	0.333371	0.0033876	0.137768
ALKBH5	17	p11.2	ENST00000261650 // Hs.740458 // ALKBH5 // 54890 // alkB, alkylation repair homolog 5 (E. coli)	-0.207393	-0.1921	-0.0857381	0.150612	-0.240588	-0.338239	-0.292253	0.0333447	-0.0398968	0.217095	-0.222896	-0.308787	-0.0179615	-0.346627	-0.214678	0.212717	0.0536618	-0.203102	0.0733439	0.0263409	-0.00952648	-0.0105899	-0.214464	-0.237259	-0.120655	-0.0174685	-0.244174	0.0527615	-0.307102	0.0554777	0.117512	-0.133286	0.129133	0.0545937	-0.265833	-0.223879	-0.229215	0.081811	-0.219603	0.0486648	-0.238501
ALKBH7	19	p13.3	ENST00000245812 // Hs.111099 // ALKBH7 // 84266 // alkB, alkylation repair homolog 7 (E. coli)	-0.410432	-0.343485	-0.263591	0.024458	-0.379656	-0.552938	-0.315077	-0.166479	-0.238444	-0.14584	0.079796	-0.133974	-0.138171	-0.508217	-0.298815	-0.346133	0.240422	-0.373602	-0.007415	0.016644	-0.197198	-0.362999	0.098985	-0.375823	-0.288893	-0.182891	-0.353003	-0.708778	-0.13151	0.217451	-0.737953	-0.254906	0.085463	-0.151097	-0.524523	-0.241796	0.105873	0.119068	-0.311362	-0.489389	-0.223377
ALKBH8	11	q22.3	ENST00000428149 // Hs.503763 // ALKBH8 // 91801 // alkB, alkylation repair homolog 8 (E. coli)	0.26832	0.274535	-0.0517749	0.594809	0.314628	0.13629	-0.0585053	-0.401682	-0.0388136	0.411348	-0.0405759	-0.314619	-0.166867	-0.239767	0.390278	0.401012	0.00885948	0.0723214	0.566491	-0.124631	-0.0641297	-0.416187	-0.025171	-0.368833	0.212767	-0.0334627	-0.0403574	-0.0760912	-0.296724	-0.00619474	-0.0292888	-0.203874	0.537787	0.0205222	-0.301449	-0.263675	-0.0560058	0.0424227	0.328796	-0.0305814	-0.226812
ALLC	2	p25.3	ENST00000252505 // Hs.97899 // ALLC // 55821 // allantoicase	-0.226717	-0.213713	-0.0721194	-0.5315	-0.404413	-0.0217227	0.0175383	-0.574427	-0.046081	0.17985	0.299759	0.0137842	-0.0346377	-0.0386022	0.118791	0.167428	0.0767634	0.11471	-0.471143	-0.0343549	-0.0898466	-0.644212	0.258469	-0.379839	0.175042	-0.0950215	-0.0249415	0.07151	0.030764	0.0665207	0.104306	-0.153428	-0.494196	0.0501002	-0.192173	-0.286779	0.349732	0.14135	-0.415519	0.0531508	-0.00367986
ALMS1	2	p13.1	ENST00000264448 // Hs.184720 // ALMS1 // 7840 // Alstrom syndrome 1	0.232283	0.210218	0.221712	0.0907765	0.173926	-0.0376149	-0.0401444	-0.203838	-0.0485075	0.309963	0.261537	0.0371983	0.062189	0.0784457	0.133589	0.343227	0.0599579	0.118247	0.108416	0.0415115	0.0583078	-0.114884	0.211703	0.13046	0.141638	-0.0620339	-0.0667946	0.280073	0.0335	0.0539864	0.264295	0.120415	0.0849595	0.0517132	0.0984541	0.088695	0.219624	0.0538747	0.18626	0.225002	0.0351298
ALMS1P	2	p13.1	ENST00000428767 // Hs.278983 // ALMS1P // 200420 // Alstrom syndrome 1 pseudogene	0.326346	0.284093	0.21671	0.044675	0.202642	-0.0547705	-0.083229	-0.239131	-0.0280629	0.226429	0.258722	-0.0184739	0.0879592	0.0549502	0.104599	0.284064	0.0391871	0.0713586	0.1379	0.0557068	-0.0135571	-0.196803	0.190061	0.0897719	0.0761475	-0.00311954	-0.121322	0.271471	-0.0455048	0.0661337	0.233086	0.0334345	0.0494352	0.102817	0.11866	0.0476582	0.22899	-0.00392731	0.232949	0.239735	-0.0259724
ALOX12	17	p13.1	ENST00000251535 // Hs.654431 // ALOX12 // 239 // arachidonate 12-lipoxygenase	0.244221	0.206424	-0.102928	-0.710499	0.450071	-0.246699	-0.217221	-0.458144	0.00899111	-0.112095	0.0330279	-0.494753	-0.170026	-0.437538	-0.212962	-0.359684	-0.159933	-0.255974	-0.599032	-0.0644321	-0.0409011	-0.587656	0.0533492	-0.461784	-0.339778	-0.116879	-0.204471	-0.0754407	-0.527108	-0.306379	-0.0354899	-0.203233	-0.453451	-0.0222597	-0.44868	-0.0675992	0.0291347	-0.233746	0.410774	0.016017	-0.420418
ALOX12B	17	p13.1	ENST00000319144 // Hs.136574 // ALOX12B // 242 // arachidonate 12-lipoxygenase, 12R type	-0.329855	-0.389581	-0.220779	-0.536289	-0.504045	-0.164095	-0.0714197	-0.289284	-0.119822	-0.107098	0.0602518	-0.31809	-0.183193	-0.524414	-0.262383	-0.174834	-0.302608	-0.267519	-0.465392	-0.139036	-0.0570509	-0.323641	0.072513	-0.403703	-0.323331	-0.0247612	-0.16555	-0.00941375	-0.365381	-0.294513	0.00138533	-0.260023	-0.510799	-0.0528738	-0.40544	-0.257039	0.073595	-0.447979	-0.482304	-0.0220113	-0.379393
ALOX15	17	p13.2	ENST00000293761 // Hs.73809 // ALOX15 // 246 // arachidonate 15-lipoxygenase	-0.0146402	0.0028152	-0.24218	-0.436489	0.24229	-0.101319	-0.0603707	-0.235674	-0.0556058	-0.175294	-0.256115	-0.386782	0.0073275	-0.298987	-0.235737	-0.203357	-0.205505	-0.267092	-0.439819	-0.109715	-0.0582642	-0.259373	-0.297371	-0.37977	-0.25767	-0.101352	-0.147075	-0.109978	-0.422699	-0.300243	-0.0416662	-0.202008	-0.37497	-0.129301	-0.340238	-0.133281	-0.340281	-0.268521	0.183368	-0.089043	-0.337127
ALOX5	10	q11.21	ENST00000542434 // Hs.89499 // ALOX5 // 240 // arachidonate 5-lipoxygenase	0.198847	0.19132	-0.171488	0.0587181	0.172992	0.115444	-0.0911718	0.144271	-0.0982163	-0.21838	0.226854	-0.231764	0.0584607	0.0323787	0.0851268	-0.193974	0.0291243	0.0808475	0.091193	-0.0126333	-0.155962	0.116761	0.177074	0.12748	0.107967	-0.113709	-0.004056	-0.562997	-0.232118	-0.0229017	-0.489855	-0.191648	0.0562869	0.0241954	0.0102334	-0.0850197	0.187874	0.0102697	0.163831	-0.468876	-0.171158
ALOX5AP	13	q12.3	ENST00000380490 // Hs.507658 // ALOX5AP // 241 // arachidonate 5-lipoxygenase-activating protein	-0.295753	-0.254182	0.323905	0.0852854	-0.349401	-0.396706	-0.355103	0.0135581	0.218493	-0.170409	-0.290855	0.0433917	-0.313849	0.451062	0.155666	-0.246871	0.29715	0.120618	0.0582424	0.0169786	-0.118123	0.0855347	-0.299532	0.525446	0.149319	0.252187	-0.275494	-0.55836	0.0406074	0.0666245	-0.517895	0.368665	0.0679487	0.00464649	0.523578	0.277379	-0.327629	0.134084	-0.284441	-0.498874	0.0256568
ALOXE3	17	p13.1	ENST00000318227 // Hs.232770 // ALOXE3 // 59344 // arachidonate lipoxygenase 3	-0.439094	-0.349591	-0.264672	-0.55698	-0.459643	-0.185845	-0.131847	-0.307515	-0.21162	-0.276261	0.0020585	-0.418509	-0.0620992	-0.411672	-0.345764	-0.378057	-0.236017	-0.12624	-0.522979	-0.215532	-0.146641	-0.296291	-0.108625	-0.471769	-0.321522	-0.162801	-0.211101	-0.0628744	-0.432991	-0.375569	-0.0674215	-0.269835	-0.488025	-0.149866	-0.303553	-0.30652	-0.0390791	-0.360272	-0.336392	-0.144899	-0.367423
ALPI	2	q37.1	ENST00000295463 // Hs.37009 // ALPI // 248 // alkaline phosphatase, intestinal	-0.0437429	-0.0801397	0.0902359	-0.424393	-0.126971	-0.60526	-0.619561	-0.390211	0.121668	0.444931	-0.262924	-0.404836	0.126089	0.140549	-0.289435	0.192498	-0.174537	-0.216384	-0.416878	-0.0607356	0.0114441	-0.320816	-0.269888	-0.319992	-0.259335	0.120581	-0.401402	0.251702	-0.42611	-0.276605	0.276997	0.121845	-0.483123	0.277218	0.0928697	0.0380125	-0.279676	-0.224151	-0.133708	0.209475	-0.328292
ALPK1	4	q25	ENST00000177648 // Hs.652825 // ALPK1 // 80216 // alpha-kinase 1	-0.307843	-0.26316	0.0457742	-0.456408	-0.321471	-0.358819	-0.321828	-0.372201	-0.0845034	-0.683484	0.0158528	-0.0367636	-0.131767	-0.501224	-0.462923	-0.732716	-0.222668	-0.504408	-0.408613	-0.123422	-0.0146996	-0.411011	-0.0198742	-0.421709	-0.424749	-0.0899141	-0.245925	-0.0590906	-0.0295126	-0.294649	-0.051257	0.0625106	-0.410943	-0.23711	-0.449784	0.0545129	0.0191399	-0.257658	-0.291766	-0.0676729	-0.0968702
ALPK2	18	q21.31	ENST00000361673 // Hs.628152 // ALPK2 // 115701 // alpha-kinase 2	-0.220749	-0.23672	-0.61027	-0.473759	-0.34719	0.305412	0.141818	0.132334	-0.0341616	-0.24399	-0.270339	-0.249191	-0.0898587	-0.381852	0.23782	-0.255585	-0.197923	0.473718	-0.415885	-0.0592173	-0.167935	0.136025	0.18032	-0.335541	0.393444	-0.0217648	0.183622	-0.58555	-0.276232	-0.209389	-0.522949	-0.641444	-0.403775	-0.2588	-0.35101	-0.67359	0.00613288	-0.185866	-0.273308	-0.509607	-0.269652
ALPK3	15	q25.3	ENST00000258888 // Hs.459183 // ALPK3 // 57538 // alpha-kinase 3	-0.0039266	5.4e-06	-0.286628	0.585758	0.000498187	-0.39058	-0.342272	-0.113289	-0.0128555	-0.206687	-0.358197	-0.0180635	-0.368781	0.0908299	0.17048	-0.23466	0.0448403	0.138731	0.608342	-0.0313606	0.108729	0.0552885	-0.34659	0.124867	0.156329	-0.0568323	-0.305711	0.48921	0.0352716	0.0876653	0.472962	-0.241872	0.574441	-0.130733	0.0571829	-0.229611	-0.345558	0.0801098	0.0574659	0.469019	0.171583
ALPL	1	p36.12	ENST00000374840 // Hs.75431 // ALPL // 249 // alkaline phosphatase, liver/bone/kidney	-0.314885	-0.352247	0.0285122	0.163152	-0.0493558	0.234785	0.157916	0.164213	0.34574	-0.249445	0.302164	0.0681729	0.282768	0.104082	0.256219	-0.21245	-0.161641	0.243987	0.133275	0.117635	-0.102582	0.221511	0.0411144	0.12926	0.245386	0.34966	0.0493713	-0.101332	0.101222	-0.247087	-0.088166	-0.172444	0.119332	0.120382	0.0968089	-0.0847829	0.0569826	-0.234149	-0.0277496	-0.142714	0.0699894
ALPP	2	q37.1	ENST00000392027 // Hs.284255 // ALPP // 250 // alkaline phosphatase, placental	0.0420829	0.0373153	0.0301108	-0.512451	-0.116645	-0.474383	-0.500451	-0.557053	0.094643	0.489143	-0.355828	-0.469803	0.0952142	-0.0382779	-0.378193	0.114565	-0.131056	-0.369054	-0.596497	-0.168979	0.00458978	-0.451711	-0.355403	-0.46594	-0.408282	0.211206	-0.304055	0.237545	-0.530824	-0.243199	0.203376	0.0715782	-0.5479	0.358576	0.0307189	0.0629957	-0.458795	-0.230656	-0.15775	0.316583	-0.385401
ALPPL2	2	q37.1	ENST00000295453 // Hs.333509 // ALPPL2 // 251 // alkaline phosphatase, placental-like 2	0.0469977	0.00827342	0.0995522	-0.4886	-0.00993026	-0.435575	-0.352043	-0.465855	0.152846	0.524768	-0.310031	-0.400267	0.140057	0.00659332	-0.398535	0.147476	-0.217265	-0.265955	-0.393507	0.0108425	0.127012	-0.332476	-0.244141	-0.413178	-0.32524	0.212365	-0.249019	0.30637	-0.443461	-0.269705	0.274063	0.13918	-0.34996	0.313056	0.0952713	0.0368042	-0.366072	-0.342825	-0.0679743	0.301881	-0.325334
ALS2	2	q33.1	ENST00000264276 // Hs.471096 // ALS2 // 57679 // amyotrophic lateral sclerosis 2 (juvenile)	0.356225	0.276589	-0.189135	0.0255972	0.39574	0.143391	0.190511	-0.601644	0.195968	0.248191	-0.324779	-0.0116132	0.0621784	0.0112229	-0.381117	0.0363878	-0.265155	-0.452461	-0.0839972	-0.146016	-0.0343256	-0.501037	-0.295834	-0.40906	-0.37753	0.19851	0.0214596	-0.0831531	-0.00474219	-0.345899	-0.0382293	-0.237275	0.0881852	0.251769	-0.028321	-0.253764	-0.331889	-0.298087	0.318208	-0.0289835	-0.0615847
ALS2CL	3	p21.31	ENST00000486301 // Hs.517937 // ALS2CL // 259173 // ALS2 C-terminal like	0.0111741	0.0105292	-0.193821	0.0788313	-0.00133814	-0.0705873	-0.0338809	0.151091	-0.0458727	-0.202512	0.0245749	0.161078	0.132927	0.0623572	0.125155	-0.209068	-0.178916	0.125761	0.107988	0.0428577	-0.0900741	0.224609	0.236453	0.139333	0.166954	-0.0479181	-0.0689944	-0.0232859	0.17944	-0.197727	-0.0262443	-0.238917	0.0294492	-0.253652	0.0642575	-0.253252	0.267515	-0.11535	0.0291606	-0.0324979	0.16878
ALS2CR11	2	q33.1	ENST00000286195 // Hs.335788 // ALS2CR11 // 151254 // amyotrophic lateral sclerosis 2 (juvenile) chromosome region, candidate 11	0.370627	0.350319	-0.182431	-0.0128378	0.393654	0.111774	0.152526	-0.571123	0.144106	0.169577	-0.369693	-0.0549284	0.0726181	-0.0125757	-0.493205	-0.0326758	-0.254753	-0.51854	-0.14306	-0.183255	-0.0587928	-0.464729	-0.293323	-0.41888	-0.504781	0.17179	-0.0099519	-0.0852638	-0.0776457	-0.326457	-0.0346996	-0.273858	0.0560043	0.258522	-0.0344639	-0.275172	-0.326124	-0.306206	0.292262	-0.0178149	-0.0629007
ALS2CR12	2	q33.1	ENST00000286190 // Hs.107944 // ALS2CR12 // 130540 // amyotrophic lateral sclerosis 2 (juvenile) chromosome region, candidate 12	0.406334	0.408414	-0.137032	0.0419253	0.491951	0.157564	0.168563	-0.562493	-0.11394	0.292916	-0.36848	-0.00925327	0.130251	0.0865656	-0.359845	0.0923343	-0.248848	-0.381048	-0.0919144	-0.0940921	-0.0805454	-0.48154	-0.289473	-0.35649	-0.303685	-0.149332	0.0883416	-0.1235	0.0176056	-0.374293	-0.0137203	-0.197431	0.0904565	0.0665677	0.0370608	-0.216653	-0.356132	-0.323878	0.374151	-0.0539317	0.00730068
ALX1	12	q21.31	ENST00000316824 // Hs.41683 // ALX1 // 8092 // ALX homeobox 1	-0.249503	-0.249496	-0.216202	0.3189	-0.327278	-0.0108859	-0.0139236	0.0141658	0.117501	0.0161006	0.0974276	-0.0218931	-0.0878551	0.30795	-0.319542	-0.0300531	-0.135851	-0.275479	0.291688	-0.0468102	-0.0270087	-0.0247029	0.0790554	0.312791	-0.300003	0.102285	-0.0511209	-0.0109419	-0.000527043	-0.224373	-0.0497136	-0.183423	0.322285	-0.276533	0.353251	-0.247729	0.121126	-0.136581	-0.300623	-0.0447363	-0.0172368
ALX3	1	p13.3	ENST00000369792 // Hs.669953 // ALX3 // 257 // ALX homeobox 3	-0.0405933	-0.068542	-0.0685057	0.0909714	0.0259122	0.0539995	0.035028	0.279694	0.278789	0.16444	0.17064	0.181827	-0.0115861	-0.246402	0.22981	0.232742	0.143575	0.322777	0.151911	0.190578	-0.0871246	0.237183	0.140019	-0.218487	0.28892	0.273469	0.0703564	-0.453814	0.194155	0.154547	-0.352926	0.126234	0.136547	0.0988291	-0.193808	0.163355	0.240864	0.203152	0.0632651	-0.354063	0.0847622
ALX4	11	p11.2	ENST00000329255 // Hs.436055 // ALX4 // 60529 // ALX homeobox 4	-0.269217	-0.272706	-0.190378	-0.546777	-0.328275	0.396655	0.369433	-0.357024	-0.071422	-0.189906	0.0638733	-0.152508	0.0837367	0.188592	-0.0925239	-0.219868	-0.542394	-0.116403	-0.47548	-0.11312	0.0903094	-0.370495	0.00955022	0.159082	-0.113797	-0.0584135	0.298118	0.337837	-0.136533	-0.776423	0.305469	-0.124163	-0.497877	0.0194769	0.14365	-0.167527	0.0326111	-0.697776	-0.276639	0.261703	-0.127711
AMACR	5	p13.2	ENST00000335606 // Hs.508343 // AMACR // 23600 // alpha-methylacyl-CoA racemase	0.088237	0.0718275	0.587392	0.128091	-0.000928227	0.201284	0.007993	-0.253331	0.698111	0.10996	0.44993	0.232597	-0.112531	0.128243	0.115581	0.085393	0.525005	0.097476	0.0846962	0.080131	0.134419	-0.0821705	0.341202	0.167153	0.0951474	0.692753	0.118144	0.544895	0.157304	0.532538	0.542091	0.704214	0.110896	0.349771	0.124992	0.687512	0.338522	0.545861	-0.0280892	0.512922	-0.0275498
AMBN	4	q13.3	ENST00000322937 // Hs.272396 // AMBN // 258 // ameloblastin (enamel matrix protein)	0.00918996	0.0650628	-0.214127	-0.410444	0.117662	-0.359805	-0.308527	0.194387	-0.0880749	-0.163179	0.0414048	-0.032184	-0.122773	0.0256148	0.101613	-0.181375	-0.208425	0.0973774	-0.381395	0.0369364	-0.0528221	0.258856	-0.00741222	0.0600501	0.120145	-0.0978727	-0.266295	-0.0887737	-0.0232272	-0.252051	-0.0493989	-0.214633	-0.370255	-0.213083	0.00575139	-0.232323	0.029643	-0.218214	0.056755	-0.0155511	-0.0473907
AMBP	9	q32	ENST00000265132 // Hs.436911 // AMBP // 259 // alpha-1-microglobulin/bikunin precursor	-0.157964	-0.195105	0.383855	-0.488706	-0.310411	0.204176	0.153405	0.358184	0.0166572	-0.0100031	0.508969	0.23197	0.0294559	0.135002	0.187235	-0.13928	0.332814	0.134458	-0.506	0.0963699	-0.0278158	0.321916	0.233648	0.256481	0.192804	-0.0492919	0.17881	-0.0200961	0.228613	0.362917	0.0469306	0.348236	-0.424951	-0.125787	0.142237	0.199713	0.189723	0.400522	-0.286057	-0.0889119	0.157891
AMBRA1	11	p11.2	ENST00000298834 // Hs.654644 // AMBRA1 // 55626 // autophagy/beclin-1 regulator 1	-0.295399	-0.258098	-0.185071	-0.514582	-0.383789	0.338545	0.360107	-0.309246	-0.0861476	0.0717298	0.0545654	-0.193714	0.107115	0.120385	0.246631	0.0457529	-0.599656	0.205386	-0.482995	-0.0998767	0.0630945	-0.347481	0.0247187	0.0999499	0.221802	-0.0987332	0.239419	0.252673	-0.159896	-0.816773	0.243986	-0.163062	-0.457491	0.0235024	0.0707739	-0.208985	7.8e-05	-0.721409	-0.353282	0.253927	-0.165663
AMD1	6	q21	ENST00000368882 // Hs.159118 // AMD1 // 262 // adenosylmethionine decarboxylase 1	-0.182062	-0.137574	-0.243479	-0.471919	-0.172311	-0.100164	0.183224	0.13022	-0.191508	0.351709	-0.413919	-0.620376	-0.0956979	0.0519876	0.175627	0.0913777	-0.247622	0.10791	-0.486603	0.0188534	-0.110663	0.175913	-0.353876	0.142859	0.117612	-0.197106	0.0778965	-0.641632	-0.643076	-0.317635	-0.584408	-0.213342	-0.403024	-0.187874	0.048519	-0.305059	-0.35404	-0.422345	-0.0996687	-0.490984	-0.513263
AMDHD1	12	q23.1	ENST00000266736 // Hs.424907 // AMDHD1 // 144193 // amidohydrolase domain containing 1	-0.252637	-0.190143	-0.203847	0.384499	-0.323292	-0.359051	-0.382321	0.0387235	0.296361	0.143778	0.0141426	0.0701626	-0.106316	0.337927	-0.354402	0.0677419	-0.18272	-0.42128	0.376239	-0.0443233	0.0494624	-0.0257959	0.0467101	0.370153	-0.362831	0.261114	-0.322644	-0.00733733	0.0242387	-0.268578	-0.0186943	-0.147658	0.35683	-0.143053	0.367712	-0.159499	0.0947677	-0.227009	-0.251441	-0.0154802	-0.00133778
AMDHD2	16	p13.3	ENST00000302956 // Hs.740430 // AMDHD2 // 51005 // amidohydrolase domain containing 2	-0.074032	-0.0533356	-0.126167	0.606926	-0.0552552	-0.503505	-0.404964	-0.312213	-0.038003	0.0198444	3.84e-05	0.0107854	-0.268543	0.187605	-0.0654842	-0.0725558	-0.0339808	-0.208886	0.808487	-0.0130776	0.154782	-0.245372	-0.0158908	0.134707	-0.180691	-0.044169	-0.256951	0.368767	0.0642418	-0.03135	0.460331	-0.307175	0.66324	-0.104755	0.192993	-0.190736	0.0391608	0.0496108	0.100655	0.355985	0.0980446
AMELY	Y	p11.2	ENST00000215479 // Hs.1238 // AMELY // 266 // amelogenin, Y-linked	-1.92747	-1.91955	-1.73677	-1.67883	-1.84165	-1.77021	-1.8316	-1.63071	-1.59818	-1.8037	-1.64339	-1.97741	-1.81642	-1.84984	-1.72676	-1.74926	-1.73883	-1.69542	-1.60731	-1.827	-1.79046	-1.73647	-1.70558	-1.8438	-1.70711	-1.72227	-1.93605	-1.73386	-1.96533	-1.81921	-1.68431	-1.67265	-1.69937	-1.90151	-1.81215	-1.78306	-1.61858	-1.78746	-1.87846	-1.68031	-1.94293
AMFR	16	q12.2	ENST00000290649 // Hs.295137 // AMFR // 267 // autocrine motility factor receptor, E3 ubiquitin protein ligase	-0.273865	-0.229238	0.278973	0.114484	-0.325242	-0.0484681	-0.29943	-0.302536	-0.0631111	-0.202025	-0.86299	0.0975415	-0.115468	-0.394943	-0.328326	-0.218592	-0.161991	-0.371053	0.0776012	-0.0577179	-0.0111105	-0.253384	-0.705525	-0.313798	-0.299498	-0.0331138	-0.0194803	0.0369079	0.0932415	-0.273008	0.0190155	0.140568	0.1016	-0.198846	-0.277141	0.166216	-0.815745	-0.188605	-0.317073	0.0345089	0.0525375
AMHR2	12	q13.13	ENST00000257863 // Hs.659889 // AMHR2 // 269 // anti-Mullerian hormone receptor, type II	-0.0193493	0.00714325	-0.176654	-0.438194	-0.0512478	-0.0813639	-0.0842281	0.0062165	-0.14407	-0.785885	-0.0329882	-0.073493	-0.0660818	-0.0292823	-0.269564	-0.841697	-0.212319	-0.275315	-0.478352	-0.0215639	-0.0908574	-0.0469147	-0.00355925	-0.058207	-0.264249	-0.154278	-0.149148	-0.284489	-0.0746172	-0.343532	-0.260995	-0.115404	-0.433352	-0.250125	0.059396	-0.136398	0.0955929	-0.292017	-0.0150796	-0.234647	-0.0374387
AMICA1	11	q23.3	ENST00000292067 // Hs.16291 // AMICA1 // 120425 // adhesion molecule, interacts with CXADR antigen 1	-0.266916	-0.265357	-0.0278952	0.380317	0.00990274	0.172038	0.0189853	-0.271793	0.00723071	0.115285	0.0599013	-0.145165	-0.0688398	0.207715	0.475732	0.107106	0.0900748	0.165871	0.368634	-0.0456595	-0.0227891	-0.257077	-0.0068069	0.159783	0.277218	0.00487064	0.000840484	-0.0481288	-0.140607	0.122923	-0.0420029	-0.13153	0.352014	0.0208332	0.1382	-0.161976	-0.00471823	0.0701646	0.00227648	-0.101931	-0.139263
AMIGO1	1	p13.3	ENST00000369864 // UTR-3 // 0 // Hs.726479 // AMIGO1 // 57463 // adhesion molecule with Ig-like domain 1	-0.313198	-0.443711	-0.142066	0.0547325	-0.112234	-0.088306	-0.0418255	0.198331	0.230298	0.261022	0.0221483	0.0100093	-0.21005	-0.392714	0.246347	0.206616	0.18107	0.0728475	0.025498	0.00054725	-0.223596	0.158724	0.0841563	-0.459975	0.197138	0.251399	0.0625462	-0.623311	0.066424	0.0701458	-0.553214	0.0957405	0.0848263	-0.0303278	-0.425316	0.108401	-0.0629445	0.128476	-0.0151042	-0.630488	-0.026923
AMIGO2	12	q13.11	ENST00000266581 // Hs.121520 // AMIGO2 // 347902 // adhesion molecule with Ig-like domain 2	0.0297684	0.0323688	-0.231162	-0.434688	-0.00991331	0.273319	0.304685	0.020871	-0.10139	0.265844	-0.353103	-0.0206297	-0.0894843	-0.421149	-0.434837	0.273952	-0.213625	-0.438726	-0.376133	-0.046504	-0.0354063	-0.0330137	-0.284221	-0.382268	-0.429327	-0.0861101	0.0863102	-0.0719427	-0.0164891	-0.257131	-0.0557459	-0.214437	-0.386669	-0.23412	-0.406243	-0.239558	-0.229162	-0.259184	0.0179804	-0.0471833	-0.0515033
AMIGO3	3	p21.31	ENST00000320431 // Hs.567903 // AMIGO3 // 386724 // adhesion molecule with Ig-like domain 3	0.102282	0.0114225	-0.234878	0.168018	0.0014285	-0.0932315	-0.014677	0.086902	-0.044648	-0.25062	0.041574	0.215959	0.172238	-0.0214965	0.219506	-0.275487	-0.211169	0.238838	0.167799	0.025029	-0.0604095	0.168193	0.197586	0.078986	0.261396	-0.0271595	-0.0316095	-0.0423825	0.156729	-0.357592	0.0040095	-0.25196	0.10038	-0.126167	0.104107	-0.193324	0.033641	-0.161966	-0.036333	-0.075941	0.149826
AMMECR1	X	q23	ENST00000372057 // Hs.656243 // AMMECR1 // 9949 // Alport syndrome, mental retardation, midface hypoplasia and elliptocytosis chromosomal region gene 1	-0.782847	-0.745889	-0.393261	0.147488	-0.947122	-0.321919	-0.281392	-0.106534	-0.105254	0.0978905	0.273262	-0.0406731	0.0499109	0.032622	0.479138	0.105072	0.237682	0.515699	0.155089	-0.0550144	-0.048619	0.0225007	0.196458	-0.405598	0.427738	-0.0676358	-0.24593	0.0310747	0.0113636	0.230065	-0.00128126	-0.168078	0.12413	-0.650769	0.0250371	-0.209124	0.230493	0.316315	-0.824563	-0.010726	0.174514
AMMECR1L	2	q14.3	ENST00000272647 // Hs.546449 // AMMECR1L // 83607 // AMME chromosomal region gene 1-like	-0.25832	-0.255572	0.185621	0.2904	-0.362604	-0.0981261	-0.0847311	0.0035706	0.178969	-0.22077	-0.31088	0.026551	0.118589	-0.145866	0.12592	-0.268967	0.248413	-0.410604	0.116629	-0.0018468	-0.0425426	0.0703859	-0.268215	-0.455668	-0.124955	0.186194	-0.115078	-0.129406	-0.0095538	0.227985	-0.119354	0.0642408	0.372834	0.283698	-0.0194887	0.0297411	-0.345927	0.201066	-0.395709	-0.0878129	0.000353314
AMN	14	q32.32	ENST00000299155 // Hs.534494 // AMN // 81693 // amnionless homolog (mouse)	0.201862	0.143645	0.148901	0.100575	0.127132	0.063854	0.207277	-0.17203	0.306301	0.198388	-0.317225	0.0420638	-0.155512	0.0542319	0.260279	0.155185	0.205428	0.20481	0.0716421	-0.0715117	0.035527	-0.0094473	-0.153088	0.111889	0.226077	0.332426	0.0102572	-0.08104	-0.0237559	0.201798	-0.100805	0.445054	0.130724	0.100056	0.0485677	0.359174	-0.142787	0.183653	0.165568	0.030703	0.0036978
AMN1	12	p11.21	ENST00000281471 // Hs.585084 // AMN1 // 196394 // antagonist of mitotic exit network 1 homolog (S. cerevisiae)	-0.040487	-0.0150449	0.231601	-0.380527	-0.0455789	-0.340732	-0.326487	0.00106042	-0.124194	0.577435	0.229811	-0.00892342	0.126458	0.0769998	-0.318339	0.553473	0.34427	-0.315925	-0.390005	-0.0289989	0.083797	-0.022964	0.292319	0.104532	-0.328532	-0.161705	-0.259472	0.206999	-0.00304179	0.40019	0.256871	0.3117	-0.363169	-0.279104	0.0953262	0.295723	0.233572	0.34552	-0.0155282	0.214458	-0.065719
AMOT	X	q23	ENST00000304758 // Hs.528051 // AMOT // 154796 // angiomotin	-0.822405	-0.817234	-0.424278	0.137624	-0.940936	-0.413161	-0.370251	-0.170385	-0.0876756	0.0614988	0.220487	-0.0368981	-0.0011067	-0.0374627	0.422018	0.0680127	0.222187	0.451127	0.111196	-0.0944851	-0.0211651	-0.0086496	0.156533	-0.443296	0.358387	-0.0485673	-0.322244	-0.024347	-0.0104351	0.169398	-0.0450136	-0.197335	0.087681	-0.653523	-0.028582	-0.246996	0.191542	0.28941	-0.91537	-0.0387734	0.199512
AMOTL1	11	q21	ENST00000317829 // Hs.503594 // AMOTL1 // 154810 // angiomotin like 1	0.481728	0.43131	-0.218294	0.600367	0.509176	0.182714	-0.00342121	-0.314895	0.0587228	-0.164214	0.0429853	-0.237712	-0.127983	0.142189	0.453383	-0.16195	0.0417108	0.138419	0.593091	-0.0880272	-0.0152055	-0.39863	0.00843367	0.151642	0.269691	0.0239514	0.0377206	0.0320512	-0.219309	0.0641761	0.0112521	-0.171589	0.550478	0.0242826	0.0635689	-0.214212	0.0383728	0.137273	0.50632	0.00177623	-0.196794
AMOTL2	3	q22.2	ENST00000514516 // Hs.426312 // AMOTL2 // 51421 // angiomotin like 2	0.0880554	0.116191	0.291215	0.440373	-0.177373	0.517188	0.522874	0.189803	0.607885	0.501809	0.318001	0.276291	0.601937	0.350833	0.417664	0.481997	0.306107	0.425693	0.455703	-0.0296355	0.205671	0.302945	0.337798	0.416106	0.48919	0.591407	0.331819	0.555004	0.28777	0.386216	0.522594	0.30594	0.422148	0.322481	0.420748	0.17145	0.361461	0.322625	-0.179161	0.526675	0.191174
AMPD1	1	p13.2	ENST00000353928 // Hs.89570 // AMPD1 // 270 // adenosine monophosphate deaminase 1	-0.169941	-0.174869	-0.0725028	0.211752	0.0621312	0.090149	0.126016	0.255265	0.168689	0.0927345	0.0100952	0.0739901	0.0224985	-0.384321	-0.369	0.055638	0.091517	-0.387025	0.21248	0.12343	-0.140858	0.271127	0.0450224	-0.240395	-0.345607	0.249254	0.0866718	-0.386113	0.0955008	0.0374926	-0.342215	0.231298	0.158784	-0.00533546	-0.334722	0.166181	0.0413622	0.0406893	0.146245	-0.365275	0.0196538
AMPD2	1	p13.3	ENST00000256578 // Hs.82927 // AMPD2 // 271 // adenosine monophosphate deaminase 2	-0.373725	-0.329992	-0.0494994	0.127718	-0.0473526	-0.0421723	-0.0326243	0.237954	0.216127	0.0974699	-0.08904	0.03317	-0.0685182	-0.492506	0.192995	0.128452	-0.0179451	0.184889	0.102283	0.0482361	-0.242857	0.154191	-0.0197667	-0.485591	0.140941	0.264423	-0.131295	-0.659647	0.0570783	-0.0345583	-0.513068	0.0827137	0.0720914	-0.0441916	-0.380432	0.0540072	-0.0765848	0.00316356	0.0648863	-0.491433	-0.0313577
AMPD3	11	p15.4	ENST00000396553 // Hs.501890 // AMPD3 // 272 // adenosine monophosphate deaminase 3	-0.020224	-0.0540786	-0.209153	-0.431662	-0.0338835	-0.334837	-0.343229	-0.312264	-0.0622427	-0.214754	0.0395636	-0.190366	0.0866493	-0.374049	-0.393237	-0.192889	-0.228839	-0.333003	-0.365174	-0.119254	-0.147977	-0.331037	-0.00303034	-0.335287	-0.356018	-0.0834821	-0.268303	-0.495776	-0.184345	-0.285978	-0.439847	-0.184966	-0.367293	-0.0372561	-0.337882	-0.19002	0.00649432	-0.239745	-0.00630569	-0.44524	-0.163725
AMPH	7	p14.1	ENST00000325590 // Hs.592182 // AMPH // 273 // amphiphysin	-0.354089	-0.823117	-0.252251	-0.431881	-0.344773	0.334188	0.155885	0.00181899	-0.0775036	0.278625	-0.0208316	0.0122685	0.0710019	0.0750978	0.0893271	0.293688	0.0464444	0.0605155	-0.392186	-0.0367508	-0.044742	0.134594	-0.0557367	0.126973	0.0793426	-0.084196	0.0740804	-0.0489673	-0.00051641	0.0629045	-0.0441514	-0.249664	-0.410831	0.0128749	0.0552888	-0.259305	-0.0656763	0.0914961	-0.25653	-0.0350074	0.00199871
AMT	3	p21.31	ENST00000273588 // Hs.102 // AMT // 275 // aminomethyltransferase	0.116723	0.127481	-0.318019	-0.050762	0.141969	-0.107401	-0.122017	0.111598	-0.219592	-0.173874	-0.115733	0.127232	0.391356	-0.0909347	0.568621	-0.396971	-0.253039	0.444525	-0.164268	0.003564	0.063346	0.221	0.184127	0.140763	0.460669	-0.098988	-0.0221753	-0.183526	0.146701	-0.313594	-0.247573	-0.410781	-0.0526847	-0.402755	0.0695973	-0.228043	-0.002115	-0.526611	0.0346683	-0.035414	0.311571
AMTN	4	q13.3	ENST00000339336 // Hs.453069 // AMTN // 401138 // amelotin	0.0228601	0.0160963	-0.286091	-0.541639	-0.043478	-0.453548	-0.355393	0.20884	-0.0850149	-0.297958	0.0169448	-0.0210679	-0.0667606	0.128801	0.136594	-0.324656	-0.220201	0.0885778	-0.526937	-0.0166865	-0.0675465	0.194551	0.0240895	0.139857	0.135159	-0.0827135	-0.186739	-0.176665	-0.0610319	-0.274862	-0.124236	-0.167393	-0.480051	-0.296694	-0.0210315	-0.227807	0.0485494	-0.246782	0.0544503	-0.14932	-0.0821673
AMY1A	1	p21.1	ENST00000370079 // Hs.599274 // AMY1A // 276 // amylase, alpha 1A (salivary)	-0.265064	-0.267384	-0.0974491	0.0676097	-0.0654392	-0.0222873	-0.0316304	0.280646	-0.132422	0.0893112	-0.00374774	-0.021676	-0.123086	-0.417741	0.144893	0.0473263	-0.0234057	0.141647	0.0810156	-0.00145508	-0.178918	0.202696	0.00738258	-0.360033	0.135373	-0.130415	0.0258707	-0.561255	-0.00277755	0.0148135	-0.445623	0.0960333	0.0547152	-0.227309	-0.389951	0.0675549	-0.015907	0.0223489	0.0173406	-0.465907	0.00735358
AMY2A	1	p21.1	ENST00000414303 // Hs.654437 // AMY2A // 279 // amylase, alpha 2A (pancreatic)	-0.26443	-0.234058	-0.145231	0.0380811	-0.00371314	0.0294884	0.01158	0.207713	0.0158006	0.0736207	0.387803	-0.0107816	-0.238588	-0.410992	0.441418	0.0679281	-0.0124629	0.39267	0.104634	-0.0738479	0.232004	0.0956857	0.311231	-0.395591	0.385917	-0.128292	-0.022192	-0.106395	-0.067252	-0.00840786	-0.115437	0.0966139	0.0286896	-0.180464	-0.412283	0.0926613	0.319958	0.0114826	-0.00734614	-0.11413	-0.00905986
AMY2B	1	p21.1	ENST00000361355 // Hs.484588 // AMY2B // 280 // amylase, alpha 2B (pancreatic)	-0.145977	-0.10583	-0.126966	0.144828	0.0707046	-0.0374109	-0.013062	0.270253	-0.0511221	0.129794	0.219476	0.0463134	-0.0631924	-0.309568	0.346819	0.0978983	0.0652677	0.320296	0.0658846	0.0632556	0.0156771	0.212092	0.182734	-0.316339	0.280695	-0.0608806	0.112236	-0.351771	0.0547257	0.135622	-0.333629	0.170181	0.0925391	-0.155048	-0.392189	0.118244	0.205371	0.0988517	0.12872	-0.295345	0.0138896
AMZ1	7	p22.3	ENST00000312371 // Hs.42221 // AMZ1 // 155185 // archaelysin family metallopeptidase 1	-0.227165	-0.0230099	0.134203	-0.367098	-0.250529	-0.444206	-0.297643	-0.120183	-0.119397	-0.0756256	0.00901142	0.0570262	0.241074	-0.322627	-0.295278	-0.0574185	-0.0214645	-0.256274	-0.37987	0.0380327	-0.0219573	0.0700573	-0.0120255	-0.389518	-0.256786	-0.133109	-0.296517	0.365587	0.0837149	-0.0157765	0.35428	0.361119	-0.385044	-0.0110841	-0.29058	0.373463	-0.0269576	-0.0170605	-0.239655	0.28191	0.0839846
AMZ2	17	q24.2	ENST00000359783 // Hs.293560 // AMZ2 // 51321 // archaelysin family metallopeptidase 2	0.230195	0.18439	0.323692	0.0320367	0.130236	0.350963	0.182027	0.160592	0.156415	-0.217603	-0.0224249	1.02674	-0.123585	0.0661766	-0.34953	-0.117558	0.0171752	-0.376052	0.0439218	0.0281749	-0.0716631	0.191622	-0.0184974	0.0876927	-0.397387	0.186442	0.167527	-0.149276	1.01234	0.0260701	-0.0853381	0.34858	0.0773864	-0.131484	0.0643066	0.370244	0.0269255	-0.014629	0.199886	-0.108922	0.912984
AMZ2P1	17	q24.1	ENST00000397713 // Hs.396447 // AMZ2P1 // 201283 // archaelysin family metallopeptidase 2 pseudogene 1	0.216478	0.195065	0.260052	0.00630907	0.156476	0.337158	0.164523	0.212643	-0.121943	-0.249167	-0.012333	0.448191	0.370069	0.0244041	-0.388632	-0.105903	0.0161519	-0.382419	0.00223771	0.134299	-0.0449031	0.274928	-0.0701449	0.0610097	-0.369211	-0.133686	0.143389	-0.0894021	0.43281	0.0207225	-0.0901223	0.219286	0.0333799	-0.102565	0.0670272	0.282454	-0.0223876	0.0389521	0.178448	-0.105124	0.373374
ANAPC1	2	q13	ENST00000341068 // Hs.436527 // ANAPC1 // 64682 // anaphase promoting complex subunit 1	-0.039223	-0.0407113	0.203789	0.104158	-0.103269	-0.0128396	0.0134411	-0.0931775	-0.00945251	-0.0981211	-0.184897	0.0693981	0.0904815	-0.268024	0.157333	-0.123695	0.147375	0.0953331	0.0864737	0.026049	-0.001561	-0.119028	-0.182519	-0.207917	0.0978186	-0.0873306	-0.0802545	-0.0368186	0.0454161	0.193921	-0.00455137	0.114781	0.0863658	-0.0429148	-0.229248	0.0788796	-0.157947	0.176673	-0.0438268	-0.0228721	0.0438553
ANAPC10	4	q31.21	ENST00000309439 // Hs.480876 // ANAPC10 // 10393 // anaphase promoting complex subunit 10	0.0104829	0.024669	0.030822	0.0774511	0.0210929	-0.324346	-0.367304	-0.358019	-0.110702	-0.543303	-0.0364099	-0.069715	-0.113116	-0.412337	0.086433	-0.514198	-0.201885	0.0640486	0.123023	-0.126883	-0.0625188	-0.382256	-0.0666559	-0.380435	0.0474572	-0.122953	-0.282491	-0.120057	-0.0507843	-0.28223	-0.0848448	0.0876662	0.101851	-0.237673	-0.372916	0.0661727	-0.0277467	-0.279203	0.0123699	-0.0815899	-0.0914994
ANAPC11	17	q25.3	ENST00000344877 // Hs.534456 // ANAPC11 // 51529 // anaphase promoting complex subunit 11	0.207395	0.172358	-0.0277193	-0.0210435	0.009005	0.240431	0.126684	0.202511	0.11372	-0.29153	0.00537258	0.109532	-0.245738	0.0507852	0.19456	-0.0214083	0.312783	0.258087	-0.0870537	-0.0664662	0.00322317	0.197135	-0.0488201	0.0252328	0.15907	0.163637	0.0479069	0.141929	0.178022	0.28849	0.104625	-0.000127333	-0.0212757	-0.0734522	0.0501892	-0.0161322	-0.0613768	0.341205	0.0122747	0.121715	0.165358
ANAPC13	3	q22.2	ENST00000510994 // Hs.106909 // ANAPC13 // 25847 // anaphase promoting complex subunit 13	0.107348	0.140975	0.209768	0.390809	-0.218757	0.556591	0.62076	0.140995	0.643829	0.577972	0.251384	0.281555	0.55582	0.439734	0.491194	0.519551	0.28534	0.477172	0.322041	0.0657088	0.159659	0.40154	0.43017	0.413089	0.464563	0.571507	0.409289	0.612274	0.264817	0.375761	0.506433	0.408094	0.436288	0.382715	0.430301	0.329138	0.342463	0.373802	-0.249879	0.551398	0.188065
ANAPC15	11	q13.4	ENST00000535503 // Hs.38044 // ANAPC15 // 25906 // anaphase promoting complex subunit 15	0.118362	0.079584	0.200063	0.469627	0.209458	0.147238	-0.167291	-0.262541	-0.076561	0.2776	-0.0012665	-0.273091	-0.214773	0.073094	0.26667	0.349525	-0.0284467	-0.258157	0.333516	-0.106652	0.081517	-0.39984	0.0363692	0.107929	-0.107888	-0.152585	-0.13986	-0.054598	-0.216185	0.00871825	-0.0590873	0.209476	0.334458	-0.046769	0.0868785	0.209871	-0.0898692	0.0217908	0.0513883	-0.0901152	-0.301442
ANAPC16	10	q22.1	ENST00000299381 // UTR-3 // 0 // Hs.426296 // ANAPC16 // 119504 // anaphase promoting complex subunit 16	0.0809268	0.095618	0.290931	-0.0373809	0.122809	0.033829	0.122578	0.174164	-0.130313	0.056502	0.266541	-0.276423	0.17957	-0.0201741	-0.239853	0.134824	-0.224888	0.175017	-0.0521655	-0.0536542	0.0330586	0.0031194	0.169152	0.0698514	-0.355301	-0.119119	-0.0945336	-0.211645	-0.185376	-0.297267	-0.152582	0.121583	-0.125699	0.0043838	0.138861	0.250067	0.0549994	-0.375648	0.0427121	-0.036756	-0.126942
ANAPC2	9	q34.3	ENST00000323927 // Hs.533262 // ANAPC2 // 29882 // anaphase promoting complex subunit 2	-0.064028	0.010823	0.322686	-0.096072	-0.142694	0.169312	0.160406	0.393828	0.10632	0.004383	0.324208	0.150757	0.194333	0.364062	0.345382	0.010662	0.501061	0.40225	-0.152688	0.185344	0.089066	0.443514	0.276202	0.435422	0.303902	0.077209	0.097656	0.123852	0.165076	0.407821	0.100246	0.266718	-0.184739	-0.150412	0.486713	0.227	0.1646	0.468863	0.009964	-0.09502	0.208875
ANAPC4	4	p15.2	ENST00000504256 // Hs.152173 // ANAPC4 // 29945 // anaphase promoting complex subunit 4	-0.215992	-0.214121	-0.189056	-0.415135	-0.284452	0.197963	0.22446	0.00368249	-0.0140779	-0.665253	-0.295299	0.0687135	0.00446507	-0.381156	0.167018	-0.726346	0.289978	0.13599	-0.380219	-0.0139221	0.00753433	0.100275	-0.264145	-0.311051	0.157105	-0.0347911	0.0888001	0.0283565	0.0565069	0.326224	0.00500614	-0.167519	-0.308692	-0.186047	-0.293158	-0.196572	-0.300673	0.357503	-0.242344	0.00425403	0.0721142
ANAPC5	12	q24.31	ENST00000261819 // Hs.7101 // ANAPC5 // 51433 // anaphase promoting complex subunit 5	-0.0706312	-0.0887301	-0.177303	-0.44898	-0.0661228	0.153774	0.195634	-0.0189657	0.1238	0.0316779	0.00794962	-0.0141472	-0.167024	-0.0324238	-0.268402	-0.0686696	-0.19273	-0.199131	-0.50292	-0.152477	-0.00587208	-0.0324372	0.0793078	-0.0455357	-0.269946	0.198286	0.104356	-0.13151	-0.00615811	-0.330606	-0.0603089	-0.138386	-0.469717	-0.178275	0.0473163	-0.209663	0.0524267	-0.351709	-0.126407	-0.0552347	-0.057075
ANAPC7	12	q24.11	ENST00000450008 // Hs.719935 // ANAPC7 // 51434 // anaphase promoting complex subunit 7	-0.283121	-0.21708	-0.202344	-0.0500963	-0.270627	0.375666	0.433422	-0.0216965	0.150637	0.133385	-0.0493117	-0.0307243	-0.0803095	0.00240082	-0.554648	-0.0750514	-0.250994	-0.558225	-0.0121543	-0.00265707	0.00409485	-0.0439264	-0.0206152	0.0138431	-0.520417	0.184495	0.155557	-0.109977	-0.0431017	-0.356911	-0.046594	-0.110769	-0.0234186	-0.187505	0.0331654	-0.111948	-0.0137501	-0.289519	-0.194488	-0.0163875	-0.0479503
ANGEL1	14	q24.3	ENST00000557497 // Hs.497448 // ANGEL1 // 23357 // angel homolog 1 (Drosophila)	0.0669353	0.0618544	0.552874	0.122768	-0.00843148	-0.386552	-0.379396	-0.127245	0.577035	0.146542	0.0587835	-0.0360374	0.176927	0.0736857	-0.382668	0.0934148	0.761067	-0.380933	0.142038	0.0272729	-0.147247	0.113221	0.00166374	0.016753	-0.3165	0.572488	-0.324235	-0.0931773	-0.0111321	0.837711	-0.107484	0.623598	0.0716874	0.0843377	0.0832991	0.527054	0.0746698	0.846433	-0.0319992	-0.115936	-0.0388905
ANGEL2	1	q32.3	ENST00000366962 // Hs.157078 // ANGEL2 // 90806 // angel homolog 2 (Drosophila)	0.187748	0.14758	0.0610611	-0.397009	0.1416	-0.0920367	-0.073209	-0.370172	-0.0417268	-0.198805	0.0206097	-0.00249895	-0.00106698	-0.0190211	-0.422643	-0.250633	0.000848639	-0.473608	-0.36456	-0.121423	-0.0650308	-0.369178	0.139766	0.0665943	-0.38931	-0.0602653	-0.103191	-0.058727	-0.00429757	-0.0201043	-0.0476996	0.247836	-0.30738	-0.0216746	0.0157872	0.186876	0.0536041	-0.0331214	0.130204	-0.0989503	-0.044637
ANGPT1	8	q23.1	ENST00000297450 // Hs.369675 // ANGPT1 // 284 // angiopoietin 1	0.445868	0.320978	0.595311	0.673163	0.486274	0.232727	0.19268	0.539531	0.365767	-0.134879	0.65886	0.218181	-0.232082	0.707703	0.41729	-0.167674	-0.0269912	0.413394	0.646088	0.233263	0.292104	0.596612	0.78548	0.857204	0.435576	0.391972	0.135753	0.682248	0.236027	-0.0338284	0.630453	0.677032	0.649156	0.0727351	0.668818	0.607227	0.779535	-0.0117997	0.426324	0.606818	0.0945821
ANGPT2	8	p23.1	ENST00000325203 // Hs.583870 // ANGPT2 // 285 // angiopoietin 2	0.0531148	0.0249888	-0.283789	0.123852	0.0235365	-0.359837	-0.872007	-0.429021	-0.642847	-0.642746	0.256734	-1.11025	0.305685	-0.338336	-0.341353	-0.757668	0.0580186	-0.406818	0.143238	-0.119027	-0.161703	-0.402203	0.108061	-0.427532	-0.366364	-0.649058	-0.195391	-0.433691	-1.07174	0.0124542	-0.509286	-0.203675	0.134813	-0.634309	-0.359237	-0.234665	0.047834	0.146903	0.0187508	-0.514785	-0.725522
ANGPT4	20	p13	ENST00000381922 // Hs.278973 // ANGPT4 // 51378 // angiopoietin 4	0.423902	0.346133	0.0152662	-0.593265	0.400665	-0.311721	-0.328065	0.496631	0.527918	0.117967	0.336697	0.0946018	0.59923	0.0807109	-0.411551	0.155356	0.166124	-0.370285	-0.526258	0.129176	0.183375	0.459857	0.310908	0.143479	-0.298197	0.50511	-0.0645654	0.410224	0.0581495	0.195283	0.0926086	0.0749945	-0.567939	0.471009	0.124446	-0.110082	0.232054	0.20943	0.418348	0.0993286	0.0850251
ANGPTL1	1	q25.2	ENST00000234816 // Hs.591474 // ANGPTL1 // 9068 // angiopoietin-like 1	0.318327	0.298177	0.0562906	-0.434445	0.248994	0.0215706	-0.0306521	0.0964254	0.308302	0.150046	0.0549632	0.0466999	0.484233	0.0718428	-0.441878	0.163174	0.123092	-0.493354	-0.400191	0.0365442	0.258564	0.181334	0.00110995	0.140746	-0.425167	0.249476	-0.0109921	0.523577	0.06864	0.116346	0.485831	0.145839	-0.378759	0.116707	0.0881964	0.185797	-0.0321763	0.2275	0.241987	0.449071	0.087887
ANGPTL4	19	p13.2	ENST00000301455 // Hs.9613 // ANGPTL4 // 51129 // angiopoietin-like 4	-0.309628	-0.288822	-0.162563	0.118264	-0.341328	0.18125	0.184972	-0.232812	0.599425	-0.0968346	-0.0146574	-0.395	-0.0656733	-0.234002	-0.178422	-0.288996	0.343828	-0.17216	0.12247	-0.0856025	0.0728977	-0.266093	0.0492346	-0.318618	-0.302065	0.560864	0.0373575	0.261935	-0.350543	0.413195	0.234118	-0.210217	0.0354439	0.601808	-0.290594	-0.156745	-0.0100006	0.367817	-0.31771	0.256192	-0.363961
ANGPTL5	11	q22.1	ENST00000334289 // Hs.318370 // ANGPTL5 // 253935 // angiopoietin-like 5	0.334531	0.321352	-0.0362199	0.584913	0.375065	0.143412	-0.0524852	-0.351181	0.0225875	0.550748	-0.0199675	-0.275859	-0.115229	0.144013	0.370061	0.572564	0.0501228	0.0812816	0.58657	-0.131705	-0.00312777	-0.378423	-0.00783282	0.11836	0.2112	-0.00813177	0.0302376	-0.0484068	-0.286868	0.0795288	-0.0623315	-0.258118	0.571335	0.0443879	0.0900715	-0.250976	-0.0215139	0.0507321	0.409156	-0.0155069	-0.211904
ANGPTL6	19	p13.2	ENST00000253109 // Hs.712850 // ANGPTL6 // 83854 // angiopoietin-like 6	0.153277	0.085332	-0.0346101	0.300425	0.0175659	0.254095	0.158233	0.0538171	1.00662	-0.061096	0.35948	0.129758	0.220438	0.535813	0.650166	-0.217358	0.716697	0.68923	0.10017	0.329799	0.139393	0.060689	0.40959	0.219789	0.755813	0.732439	0.266055	0.326926	-0.01715	0.746155	0.0565638	0.18111	0.133148	0.990628	0.52561	0.172447	0.440272	0.614378	0.00393525	0.341415	-0.00583762
ANK1	8	p11.21	ENST00000265709 // Hs.654438 // ANK1 // 286 // ankyrin 1, erythrocytic	0.21385	-0.016628	0.296826	0.0447723	0.211007	-0.10481	-0.224403	0.180663	0.241664	-0.645453	1.07115	0.193822	-0.114449	-0.292929	0.440069	-0.652708	-0.210855	0.425517	0.0578494	0.017622	-0.164794	0.189068	0.919101	-0.316134	0.44162	0.293814	-0.102438	-0.480561	0.196853	-0.396208	-0.551349	0.2921	0.0173799	0.0467385	-0.259483	0.285938	1.06113	-0.2685	0.212932	-0.53039	0.0761385
ANK2	4	q25	ENST00000503271 // Hs.620557 // ANK2 // 287 // ankyrin 2, neuronal	-0.280642	-0.267162	0.0597208	-0.421921	-0.290002	-0.333938	-0.308139	-0.353422	-0.0884035	-0.606565	-0.00432703	-0.0547817	-0.130471	-0.443962	-0.407109	-0.653704	-0.20449	-0.432314	-0.381869	-0.10464	-0.0464747	-0.375667	-0.0179808	-0.388691	-0.360205	-0.0900372	-0.257468	-0.0798867	-0.0506717	-0.264201	-0.0636874	0.0873139	-0.370374	-0.215929	-0.406741	0.0658829	0.00768401	-0.212462	-0.2748	-0.0712299	-0.0896161
ANK3	10	q21.2	ENST00000280772 // Hs.499725 // ANK3 // 288 // ankyrin 3, node of Ranvier (ankyrin G)	0.319926	0.293158	-0.169244	0.119554	0.257411	0.238706	0.013781	0.202575	-0.0682963	-0.153548	0.240548	-0.227638	0.146183	-0.39075	-0.358705	-0.195917	1.77877	-0.391994	0.129217	0.0433403	-0.0282107	0.184419	0.195421	-0.256895	-0.389543	-0.0486118	0.0808327	-0.0265384	-0.213458	1.82714	-0.0313267	-0.185364	0.026871	0.0536967	-0.33997	-0.090797	0.22005	1.78692	0.171148	-0.0216055	-0.147769
ANKAR	2	q32.2	ENST00000281412 // Hs.655700 // ANKAR // 150709 // ankyrin and armadillo repeat containing	0.36973	0.362745	-0.100545	0.0761327	0.404651	0.186808	0.214587	-0.199154	0.193775	0.012198	-0.308294	-0.0113676	0.168589	0.0980352	0.658601	-0.198491	0.0258608	0.430253	0.0523364	0.0630519	-0.0835345	-0.00797318	-0.235847	-0.212554	0.521576	0.211675	0.0953273	-0.0789961	-0.01904	0.0422597	-0.0434932	0.111463	0.102746	0.26655	0.109206	-0.0153047	-0.302373	-0.0254804	0.288417	-0.103094	0.0332463
ANKDD1A	15	q22.31	ENST00000319580 // Hs.207157 // ANKDD1A // 348094 // ankyrin repeat and death domain containing 1A	-0.27645	-0.226465	0.324331	0.0921157	-0.310319	-0.329295	-0.295378	0.0219878	-0.146325	-0.211121	0.0332493	-0.136076	-0.266588	-0.421109	-0.255079	-0.252246	-0.177519	-0.208999	0.0860755	0.0785916	0.0847942	0.135087	0.0141707	-0.420253	-0.204841	-0.105219	-0.214413	0.293565	-0.115366	-0.215207	0.292685	0.404613	0.0802046	-0.091086	-0.336792	0.451024	-0.0964589	-0.213821	-0.272622	0.295512	0.0604811
ANKFN1	17	q22	ENST00000318698 // Hs.673040 // ANKFN1 // 162282 // ankyrin-repeat and fibronectin type III domain containing 1	0.0962385	0.052893	0.260653	-0.419176	0.135996	0.351797	0.167051	0.167489	0.48948	-0.211517	-0.00508212	0.01869	0.4388	0.0676386	-0.435455	-0.0610365	0.0588986	-0.442762	-0.365521	0.00894558	-0.0333723	0.0759158	-0.00588022	0.117252	-0.388978	0.486791	0.209232	-0.0325784	0.0210163	0.0848833	-0.0266717	0.216338	-0.307655	-0.0545776	0.0640476	0.264734	0.0626834	0.0959983	0.221639	-0.0303418	0.0133836
ANKFY1	17	p13.2	ENST00000341657 // Hs.696087 // ANKFY1 // 51479 // ankyrin repeat and FYVE domain containing 1	-0.026738	-0.039177	-0.25705	-0.617506	0.14235	-0.0948864	-0.0788832	-0.400271	-0.168985	-0.290563	-0.355796	-0.526424	-0.1543	-0.508167	-0.328967	-0.337721	-0.250589	-0.359889	-0.594626	-0.136638	-0.0386586	-0.44071	-0.301282	-0.474546	-0.326141	-0.166913	-0.130446	-0.102935	-0.538262	-0.344139	-0.088505	-0.207965	-0.563436	-0.0972903	-0.468428	-0.238875	-0.371357	-0.31861	0.116565	-0.0652876	-0.446735
ANKH	5	p15.2	ENST00000284268 // Hs.156727 // ANKH // 56172 // ankylosis, progressive homolog (mouse)	0.607613	0.559409	0.611619	0.124381	0.582989	0.193702	0.0192571	0.296964	0.706769	0.188486	0.489692	0.23253	0.140931	0.431759	0.153011	0.187668	0.550617	0.0976509	0.121481	0.18374	0.343676	0.385704	0.289528	0.494772	0.148824	0.735358	0.102183	1.01388	0.158228	0.567458	0.964883	0.691626	0.114827	0.377567	0.44711	0.701807	0.300003	0.58758	0.541945	0.894037	-0.0155372
ANKHD1	5	q31.3	ENST00000235510 // Hs.594084 // ANKHD1 // 54882 // ankyrin repeat and KH domain containing 1	-0.26989	-0.276797	0.00323937	0.19883	-0.281824	0.184933	0.345106	0.0130409	0.168619	0.316375	0.421957	0.0223954	0.0338963	0.0363511	0.117779	0.209831	-0.196395	0.116315	0.178972	-0.0902173	0.0619396	-0.134435	0.307743	0.111424	0.100587	0.209399	0.152837	0.240392	-0.00408857	-0.252388	0.215776	0.0631102	0.207846	0.114091	0.0843718	0.078144	0.307215	-0.266018	-0.278736	0.216233	-0.0412161
ANKIB1	7	q21.2	ENST00000265742 // Hs.83293 // ANKIB1 // 54467 // ankyrin repeat and IBR domain containing 1	0.231521	-0.246466	0.293087	-0.419473	0.218789	0.139308	0.157544	0.0162209	-0.119906	0.380319	-0.0498836	-0.0390744	0.0602995	0.0227012	0.0960078	0.38044	0.192956	0.063256	-0.386321	-0.0191256	-0.0432078	0.113319	-0.046456	0.0919097	0.0629113	-0.119039	0.0609868	-0.0557265	-0.0465303	0.176137	-0.0572418	0.289912	-0.358431	0.0252621	0.0386613	0.313379	-0.0778232	0.132191	0.261174	-0.0320122	-0.0138222
ANKK1	11	q23.2	ENST00000303941 // Hs.448473 // ANKK1 // 255239 // ankyrin repeat and kinase domain containing 1	-0.298562	-0.301143	-0.0364771	0.597369	0.0776855	0.113802	-0.0754001	-0.227915	0.0812207	-0.235948	0.0416045	0.325833	-0.161508	-0.0395638	0.475768	-0.1845	0.145106	0.194433	0.632272	0.0655515	0.0691478	-0.178247	-0.0873218	-0.283306	0.337562	0.0654814	-0.071372	0.0440177	0.356239	0.180729	0.11983	-0.261188	0.549736	0.0279935	-0.220493	-0.284772	-0.00686454	0.25502	-0.0505059	4.18e-06	0.236587
ANKLE2	12	q24.33	ENST00000337516 // Hs.654628 // ANKLE2 // 23141 // ankyrin repeat and LEM domain containing 2	0.0104544	0.00113081	-0.165107	0.160548	-0.349718	0.504986	0.673996	0.272147	0.23574	0.151152	0.0508431	0.0563219	0.0440303	0.118215	-0.186095	0.0231896	-0.138346	-0.200733	0.124189	0.129476	0.0367918	0.26611	0.0692433	0.0947756	-0.128948	0.209224	0.574811	0.0163347	0.124794	-0.221829	0.0211854	-0.0595933	0.101203	-0.0827491	0.137541	-0.121039	0.125484	-0.188824	-0.31748	-0.00740136	0.077816
ANKMY1	2	q37.3	ENST00000272972 // Hs.656615 // ANKMY1 // 51281 // ankyrin repeat and MYND domain containing 1	0.0265909	0.0109057	0.108946	-0.404942	-0.0361524	-0.36793	-0.362873	-0.16248	0.202129	0.0777706	-0.239133	-0.336917	0.138361	0.103553	-0.244526	-0.176795	-0.424129	-0.26088	-0.359908	-0.037871	0.0786821	-0.140464	-0.257059	-0.326749	-0.224788	0.210008	-0.255859	0.331621	-0.330556	-0.631202	0.282466	0.156405	-0.365396	0.342715	0.0979547	0.108889	-0.251789	-0.514991	-0.131209	0.231529	-0.233839
ANKMY2	7	p21.1	ENST00000306999 // Hs.157378 // ANKMY2 // 57037 // ankyrin repeat and MYND domain containing 2	-0.284685	0.0455227	-0.223708	0.109342	-0.249745	-0.38104	-0.366451	-0.241906	-0.0300509	0.121963	-0.0559612	-0.0220479	0.0849182	-0.431165	0.12737	0.0831727	0.0718438	0.0783662	0.10136	-0.0122547	0.131593	-0.0823482	-0.0708497	-0.389272	0.0659236	-0.0700165	-0.272466	0.425441	-0.0308594	0.0218739	0.450632	-0.198753	0.130298	0.0455225	-0.349632	-0.236925	-0.0633329	0.0836503	-0.197404	0.410663	0.0112479
ANKRA2	5	q13.2	ENST00000296785 // Hs.239154 // ANKRA2 // 57763 // ankyrin repeat, family A (RFXANK-like), 2	-0.208753	-0.213774	-0.0958897	-0.390316	-0.252559	0.200861	-0.14314	-0.201737	-0.625349	-0.601134	0.432196	0.0423708	-0.0805669	-0.412488	-0.334193	-0.730726	-0.252075	-0.360874	-0.356468	-0.0271842	-0.0419514	-0.281431	0.353301	-0.380613	-0.330477	-0.6033	0.0522758	-0.00991479	0.0355839	-0.292546	-0.0112191	-0.159893	-0.333891	-0.411422	-0.351025	-0.128676	0.366797	-0.271294	-0.228961	-0.0502451	-0.0190098
ANKRD1	10	q23.31	ENST00000371697 // Hs.448589 // ANKRD1 // 27063 // ankyrin repeat domain 1 (cardiac muscle)	0.273765	0.301438	-0.131273	0.0693948	0.0593375	-0.282253	-0.208729	-0.296167	-0.00364509	0.115541	-0.269586	-0.20701	0.115599	0.0286236	-0.338772	0.135431	-0.145439	0.109143	0.108093	-0.0810354	-0.020126	-0.319093	0.0551694	0.202692	-0.296848	0.00238977	-0.186848	0.0109939	-0.18532	-0.244756	-0.009334	-0.147908	0.0906083	0.0942735	0.0138647	-0.0520739	-0.088954	-0.147514	-0.018604	0.032874	-0.0857454
ANKRD10	13	q34	ENST00000267339 // Hs.525163 // ANKRD10 // 55608 // ankyrin repeat domain 10	-0.258504	-0.224726	-0.674372	0.0373388	-0.362002	-0.403176	-0.359298	-0.187007	0.277372	-0.172963	-0.31961	0.0282589	0.149884	0.0222342	-0.436679	0.121418	0.358793	-0.475524	0.0245119	-0.0557835	0.190589	-0.223287	-0.372348	0.114902	-0.399353	0.316243	-0.240293	0.582473	0.0229597	0.435998	0.520272	-0.692202	0.0269583	0.0515097	0.0871135	-0.671342	-0.390374	0.421735	-0.33033	0.44743	-0.00427759
ANKRD11	16	q24.3	ENST00000301030 // Hs.740440 // ANKRD11 // 29123 // ankyrin repeat domain 11	0.258124	0.260875	0.216787	0.580884	0.163233	-0.140357	-0.0758965	-0.340192	-0.139745	-0.194902	-0.919692	-0.414393	-0.12399	-0.348149	-0.300936	-0.211456	-0.556226	-0.293811	0.58594	-0.112754	-0.046222	-0.378105	-0.806328	-0.335	-0.287059	-0.113762	-0.0614195	-0.0692383	-0.40034	-0.814766	-0.0432665	0.133097	0.548009	-0.219877	-0.334054	0.0969616	-0.942148	-0.743459	0.155724	-0.0349573	-0.350694
ANKRD12	18	p11.22	ENST00000262126 // Hs.464585 // ANKRD12 // 23253 // ankyrin repeat domain 12	-0.232234	-0.262391	0.0678924	1.30558	-0.392046	-0.0757766	0.1398	0.0133754	0.164369	0.0765955	-0.318254	-0.287224	-0.119666	-0.44412	-0.429158	0.092508	0.215042	-0.447704	1.23087	-0.028191	0.0691539	0.0889451	0.0907978	-0.380627	-0.409049	0.187793	-0.0544067	0.261014	-0.284224	0.27554	0.223021	0.0798105	1.24062	0.121772	-0.402026	0.147984	-0.0940199	0.24267	-0.297296	0.202546	-0.289168
ANKRD13A	12	q24.11	ENST00000261738 // Hs.528703 // ANKRD13A // 88455 // ankyrin repeat domain 13A	-0.23433	-0.216674	-0.245844	0.127092	-0.35715	0.586266	0.628662	0.00749342	0.199032	0.151735	-0.0171335	0.0190188	-0.0910169	0.0438092	-0.359926	0.0552609	-0.178544	-0.391048	0.0887647	-0.0242368	0.0244533	0.0179321	0.0359455	0.0308303	-0.352052	0.204539	0.323318	-0.130911	-0.00674017	-0.270003	-0.0691635	-0.183325	0.117669	-0.161049	0.104894	-0.194957	0.0715686	-0.264407	-0.310427	-0.0698181	0.00719247
ANKRD13B	17	q11.2	ENST00000487527 // Hs.662164 // ANKRD13B // 124930 // ankyrin repeat domain 13B	-0.19001	-0.245432	-0.0824885	-0.442395	-0.256134	-0.385752	-0.231292	-0.107802	-0.0338348	-0.124447	0.0363482	-0.412387	0.109598	-0.422625	-0.30084	-0.0598764	0.14875	-0.341818	-0.38971	-0.0494536	-0.0930406	-0.0957426	-0.00187329	-0.369007	-0.29095	-0.0153406	-0.138381	0.0432554	-0.428636	0.0402075	0.0310073	-0.207837	-0.340148	-0.0925738	-0.30545	-0.176319	0.0400209	0.0330954	-0.188262	-0.0114531	-0.333681
ANKRD13C	1	p31.1	ENST00000262346 // Hs.740526 // ANKRD13C // 81573 // ankyrin repeat domain 13C	-0.345915	-0.320063	-0.125042	0.074401	-0.0890061	-0.0852398	-0.0558527	0.0178876	-0.226237	-0.234889	-0.0268509	-0.0382046	0.175126	-0.516733	0.107555	-0.337789	-0.0327837	0.0840121	0.0640239	-0.0516979	-0.0525906	0.0426143	-0.00482018	-0.452312	0.0584487	-0.189707	-0.115356	-0.165053	-0.0529743	-0.0417979	-0.0996588	0.0956994	0.109513	-0.233794	-0.457833	0.045802	-0.0553996	-0.0881269	-0.0340147	-0.0667314	-0.0971593
ANKRD13D	11	q13.2	ENST00000308440 // Hs.438673 // ANKRD13D // 338692 // ankyrin repeat domain 13 family, member D	-0.100018	-0.0686327	0.323339	0.681381	0.00832157	0.0820849	0.0132951	-0.137478	0.0979979	0.0733001	0.137143	-0.0675156	-0.0409716	0.215566	0.276493	0.0701439	0.0969803	-0.0300207	0.554336	0.0178821	0.0115161	-0.0776406	0.082831	0.102572	0.0901174	0.0869931	-0.0622229	0.092814	-0.00355229	0.161052	0.0609517	0.271176	0.48774	0.0890214	0.245279	0.168266	0.114906	0.0933613	-0.0202469	0.0438946	-0.0155781
ANKRD16	10	p15.1	ENST00000380094 // Hs.289828 // ANKRD16 // 54522 // ankyrin repeat domain 16	0.00208182	0.0380462	0.678334	-0.323	0.0805102	0.215504	0.415338	0.163941	-0.164796	-0.116769	-0.0349051	-0.0987014	0.460425	-0.29153	0.491028	-0.158998	-0.0911306	0.357322	-0.351021	-0.0303212	-0.0386694	0.120306	0.0691233	-0.144889	0.45498	-0.163069	0.135955	-0.062946	-0.0543483	-0.249764	-0.0469878	0.340009	-0.345717	-0.168936	-0.225067	0.458049	0.0315506	-0.238308	-0.0642515	-0.0592679	0.075279
ANKRD17	4	q13.3	ENST00000330838 // Hs.644997 // ANKRD17 // 26057 // ankyrin repeat domain 17	-0.0157391	0.00497358	-0.242078	-0.460208	-0.0125385	-0.377418	-0.37277	0.152726	-0.133151	-0.17664	-0.0297304	-0.0474096	-0.130943	0.0347046	0.0909881	-0.225735	-0.222229	0.069319	-0.390025	-0.019878	-0.0776702	0.134815	-0.0408203	0.0687729	0.0730221	-0.107726	-0.296297	-0.136266	-0.0449877	-0.283952	-0.0981188	-0.210039	-0.38232	-0.236289	-0.00522717	-0.23842	-0.0132266	-0.264194	-0.0114594	-0.0804968	-0.0776761
ANKRD19P	9	q22.31	ENST00000473204 // Hs.643597 // ANKRD19P // 138649 // ankyrin repeat domain 19, pseudogene	-0.241738	-0.298323	-0.191001	-0.4306	-0.356468	-0.103602	-0.0774879	0.179057	-0.0954215	-0.27074	0.289767	0.196037	-0.116976	-0.00562072	-0.204268	-0.20433	0.219696	-0.202475	-0.371873	-0.0161313	-0.0954447	0.178888	0.247688	-0.176804	-0.193896	-0.0991172	-0.0225913	-0.504436	0.142672	0.276609	-0.520607	-0.294889	-0.459524	-0.235673	0.0647468	-0.494033	0.193543	0.285772	-0.392732	-0.438379	0.0434335
ANKRD2	10	q24.2	ENST00000298808 // Hs.73708 // ANKRD2 // 26287 // ankyrin repeat domain 2 (stretch responsive muscle)	0.0112139	-0.0683152	-0.137084	-0.423688	-0.000541769	-0.380578	-0.271095	-0.289886	-0.0288135	-0.220109	-0.244727	-0.092506	0.0768647	0.075771	-0.247703	-0.283491	-0.130685	0.186803	-0.394409	-0.0820308	0.0157011	-0.299761	0.0853893	0.185311	-0.210088	-0.0307355	-0.239069	0.00584015	-0.148235	-0.215766	0.0136032	-0.175955	-0.386808	0.104468	0.125954	-0.20093	-0.0111128	-0.218817	-0.211851	0.0280638	-0.0491992
ANKRD20A11P	21	q11.2	ENST00000344693 // Hs.364456 // ANKRD20A11P // 391267 // ankyrin repeat domain 20 family, member A11, pseudogene	-0.0185284	-0.0171413	0.282595	0.385572	-0.0252608	-0.0581818	-0.06177	0.109388	0.0586611	0.593492	-0.275393	-0.155059	0.169604	0.100939	0.0194455	0.653615	-0.140091	0.0547116	0.351613	0.0373538	-0.0533636	0.132644	-0.0508345	0.0949445	0.0956911	0.0780842	-0.0570362	-0.0287828	-0.179942	-0.219917	0.0371772	0.335232	0.321934	0.0167006	0.0860883	0.210151	-0.110563	-0.188187	0.0163286	-0.0408855	0.350852
ANKRD22	10	q23.31	ENST00000371930 // Hs.217484 // ANKRD22 // 118932 // ankyrin repeat domain 22	0.166608	0.129557	-0.175896	0.0988143	-0.0748033	-0.348693	-0.331347	-0.33972	-0.121929	0.0271176	0.208967	-0.273795	0.0854863	0.0830222	-0.330518	0.0429217	-0.250732	0.0885168	0.086626	-0.200104	-0.0983336	-0.365343	0.193606	0.198971	-0.353041	-0.0922965	-0.304289	-0.0579586	-0.267829	-0.317948	-0.0958521	-0.208394	-0.0326157	0.0198853	0.0384981	-0.121208	0.0859302	-0.241467	-0.161747	-0.0839535	-0.212888
ANKRD23	2	q11.2	ENST00000476975 // Hs.643430 // ANKRD23 // 200539 // ankyrin repeat domain 23	0.0313924	0.00154329	-0.0236403	-0.0970791	-0.0675186	-0.320485	-0.301637	0.0723561	-0.263907	-0.139514	-0.132123	-0.0664317	-0.0981221	-0.0627381	-0.0264406	-0.178094	-0.082409	0.00883843	-0.160224	-0.26296	-0.245425	0.0884556	-0.179713	-0.142178	0.0238511	-0.318669	-0.302053	-0.241167	-0.0498839	-0.0924451	-0.210874	-0.123839	-0.152546	-0.124451	-0.0938461	-0.212652	-0.170473	-0.0580689	-0.105375	-0.186138	-0.149233
ANKRD24	19	p13.3	ENST00000262970 // Hs.197872 // ANKRD24 // 170961 // ankyrin repeat domain 24	-0.224895	-0.207752	-0.138381	-0.286082	-0.307123	-0.395698	-0.306461	-0.188606	-0.213853	-0.282208	0.0263773	0.055117	-0.128896	-0.220066	-0.136449	-0.423312	0.0826183	-0.194802	-0.301637	-0.0466987	-0.0183913	-0.258801	0.0391973	-0.30731	-0.243214	-0.245137	-0.385842	-0.404745	0.0995427	-0.00347267	-0.309988	-0.11764	-0.322099	-0.184953	-0.301381	-0.136668	-0.083091	-0.117714	-0.273906	-0.349005	0.0617433
ANKRD26	10	p12.1	ENST00000445828 // Hs.361041 // ANKRD26 // 22852 // ankyrin repeat domain 26	0.00979763	0.0134649	0.253148	0.0781415	0.0314803	0.158975	0.325528	0.170064	-0.125243	-0.20165	0.214038	-0.231121	0.392005	0.311227	0.0845331	-0.216476	-0.259985	0.0736731	0.125761	-0.0154777	-0.173069	0.127684	0.161796	0.393109	0.0510567	-0.151663	0.0522298	-0.626941	-0.246781	-0.360711	-0.557678	-0.217257	0.104778	-0.0862688	0.339255	-0.0580514	0.147863	-0.330344	-0.0933365	-0.49134	0.00920992
ANKRD27	19	q13.11	ENST00000306065 // Hs.59236 // ANKRD27 // 84079 // ankyrin repeat domain 27 (VPS9 domain)	0.271896	0.267949	-0.0546846	0.0662463	0.273143	0.164637	0.22258	0.35083	1.08226	0.131228	-0.0150954	-0.187691	0.110439	0.0586738	0.145336	0.135651	0.401817	0.13119	0.0916095	0.142972	0.0456444	0.429558	-0.16506	0.117666	0.164069	1.12154	0.0859092	0.260808	-0.205622	0.414901	0.273226	0.155835	0.101612	0.872074	0.103712	0.131334	-0.0182901	0.347867	0.219957	0.274157	-0.123607
ANKRD28	3	p25.1	ENST00000383777 // Hs.335239 // ANKRD28 // 23243 // ankyrin repeat domain 28	-0.285571	-0.286949	0.316654	0.114462	-0.299731	-0.359359	-0.349034	0.146319	-0.131707	-0.202456	0.243114	0.179529	0.150798	0.102393	-0.359264	-0.227985	-0.229698	-0.435918	0.111636	0.0493202	-0.0350166	0.194314	0.203989	0.135286	-0.335156	-0.099596	-0.262654	-0.0498992	0.203517	-0.266245	-0.0558739	0.331295	0.135603	-0.237975	0.0946576	0.265321	0.248625	-0.249132	-0.356953	-0.0563506	0.217893
ANKRD29	18	q11.2	ENST00000284207 // Hs.374774 // ANKRD29 // 147463 // ankyrin repeat domain 29	-0.303858	-0.290616	0.0602137	1.36649	-0.325999	-0.058356	0.142928	0.182973	0.188898	0.682131	-0.29728	-0.196296	-0.0464389	-0.383742	0.138012	0.657398	-0.0119348	0.40998	1.25872	0.0261387	0.0675013	0.149518	0.0711144	-0.309049	0.331351	0.223546	0.016938	0.249444	-0.180538	0.0205587	0.271375	0.117951	1.32882	0.117696	-0.328701	0.164165	-0.0631344	0.0445951	-0.285984	0.249038	-0.220869
ANKRD30A	10	p11.21	ENST00000374660 // Hs.373787 // ANKRD30A // 91074 // ankyrin repeat domain 30A	0.198713	0.213388	0.238275	0.0833245	0.210401	0.164888	0.179011	0.16113	-0.0398956	-0.163802	0.26851	-0.304644	0.452053	0.0425261	0.0653133	-0.16559	0.0119081	0.0698768	0.079096	0.0108725	-0.0886254	0.169616	0.222831	0.145077	0.0941822	-0.0498943	0.0489663	-0.484156	-0.259896	0.0397017	-0.409769	-0.132843	0.0691742	0.0425846	0.0362139	-0.0355726	0.223806	0.0570814	0.147023	-0.393613	-0.0760068
ANKRD30B	18	p11.21	ENST00000277669 // Hs.567889 // ANKRD30B // 374860 // ankyrin repeat domain 30B	-0.265617	-0.252839	0.0684426	-0.294234	-0.276924	-0.0439497	0.119332	0.0283159	0.214197	-0.462564	-0.286259	-0.259909	-0.295401	-0.36302	0.0125361	-0.473033	0.187807	0.03139	-0.271899	0.0287675	0.0799031	0.0645338	0.0245125	-0.339964	0.0539843	0.182711	-0.00444437	0.244292	-0.278286	0.216355	0.231092	0.0978842	-0.292419	0.156206	-0.271671	0.150231	-0.0970856	0.227307	-0.216039	0.185468	-0.221164
ANKRD30BL	2	q21.2	ENST00000295181 // Hs.380689 // ANKRD30BL // 554226 // ankyrin repeat domain 30B-like	-0.310316	-0.236045	0.174546	-0.284522	-0.208796	-0.0185541	-0.0221454	0.0843512	0.225004	-0.165617	-0.296363	-0.0299831	0.158375	0.238427	0.0656879	-0.196628	0.18047	-0.302568	-0.284996	0.0814539	-0.0204767	0.133653	-0.248036	0.131111	-0.0377506	0.20654	-0.0829439	-0.0314275	0.0412499	0.2018	0.0226958	0.33601	-0.253018	0.254264	0.255725	0.245929	-0.30827	0.157987	-0.231009	-0.0365983	0.0686999
ANKRD31	5	q13.3	ENST00000274361 // Hs.482533 // ANKRD31 // 256006 // ankyrin repeat domain 31	-0.0273136	-0.0387637	-0.278683	-0.432198	-0.0502503	-0.322776	-0.806689	-0.204706	-0.571484	-0.527986	0.31358	0.00619818	-0.14912	-0.473175	-0.427154	-0.31953	0.0304266	-0.46131	-0.37253	-0.107268	-0.0515625	-0.280812	0.221054	-0.407156	-0.402076	-0.582445	-0.306112	-0.105372	-0.0173638	0.0318944	-0.0422732	-0.251644	-0.369023	-0.424138	-0.421292	-0.40203	0.231057	0.0394108	0.00785138	-0.0570789	-0.0490426
ANKRD32	5	q15	ENST00000265140 // Hs.657315 // ANKRD32 // 84250 // ankyrin repeat domain 32	0.0886433	0.0943212	0.0629126	-0.442757	0.0344648	-0.0725839	-0.0660679	-0.204805	-0.65191	0.10765	0.364696	-0.0977547	-0.141072	-0.425033	-0.429159	0.199391	-0.163683	-0.430425	-0.394451	-0.104828	0.0449176	-0.269928	0.318866	-0.358019	-0.4657	-0.680639	-0.0913659	0.298631	-0.0862902	-0.229326	0.244171	-0.219718	-0.36356	-0.401191	-0.356102	-0.110166	0.28293	-0.203319	0.0330492	0.241807	-0.0784367
ANKRD33	12	q13.13	ENST00000301190 // Hs.433492 // ANKRD33 // 341405 // ankyrin repeat domain 33	0.0402359	0.0199381	-0.206269	-0.488676	-0.0384316	-0.0994656	-0.041964	0.0179835	-0.0904884	-0.194128	0.0357251	0.0428009	-0.0618044	-0.472798	-0.281544	-0.179576	-0.152757	-0.294623	-0.448271	0.0354797	-0.0264816	0.0514633	0.0655803	-0.419818	-0.253093	-0.0343517	-0.103176	-0.0219322	0.0373863	-0.278168	-0.0217647	-0.181545	-0.46417	-0.213124	-0.406467	-0.206424	0.118242	-0.176766	0.0571024	-0.0626641	0.00992454
ANKRD34A	1	q21.1	ENST00000323397 // Hs.620591 // ANKRD34A // 284615 // ankyrin repeat domain 34A	0.333969	0.234016	0.253161	0.021408	0.098447	0.059079	0.170855	0.25964	0.278994	0.287484	0.223036	0.109329	0.342029	0.113799	0.146318	0.202168	0.204719	0.135955	0.030263	0.032366	0.230893	0.273186	-0.018944	0.093424	0.073222	0.209216	-0.007337	0.69214	0.093567	0.176711	0.429799	0.115407	-0.122408	0.126878	0.211276	0.164535	0.00983	0.06779	0.036867	0.504243	-0.110041
ANKRD34B	5	q14.1	ENST00000338682 // Hs.519404 // ANKRD34B // 340120 // ankyrin repeat domain 34B	-0.0749937	-0.0629565	-0.564402	-0.351549	0.0334677	-0.704488	-0.716991	-0.100057	-0.59989	-0.495569	0.301927	-0.0881352	-0.135108	-0.451574	-0.409268	-0.316816	-0.300817	-0.319837	-0.322236	-0.0118007	-0.079893	-0.241962	0.243107	-0.453519	-0.362343	-0.587912	-0.365673	-0.135293	-0.112783	-0.414786	-0.0439836	-0.691435	-0.361901	-0.529437	-0.223602	-0.659459	0.211133	-0.367934	0.0408045	-0.127029	-0.128596
ANKRD34C	15	q25.1	ENST00000421388 // UTR-3 // 0 // Hs.531231 // ANKRD34C // 390616 // ankyrin repeat domain 34C	0.132866	0.0666458	-0.182901	0.663804	0.0924901	-0.344737	-0.28362	0.0193475	0.133058	-0.314659	0.122168	0.062077	-0.295233	0.176098	-0.319057	-0.232566	0.0932675	-0.381568	0.634578	0.0579246	0.215506	0.184998	-0.0093489	0.191975	-0.337662	-0.0183396	-0.268257	0.700299	0.0350234	0.12829	0.642033	-0.192242	0.648752	-0.0912589	0.1338	-0.187693	-0.0427942	0.170254	0.146347	0.609973	0.189621
ANKRD35	1	q21.1	ENST00000355594 // Hs.710624 // ANKRD35 // 148741 // ankyrin repeat domain 35	-0.00132621	-0.00999534	0.15462	0.0759989	0.0294795	0.0706194	0.08133	0.239549	0.279615	0.325362	0.0913201	0.081091	0.412063	0.11209	0.17712	0.28528	0.0955104	0.171243	0.0937532	0.0376525	0.186165	0.232485	0.0483599	0.153981	0.181124	0.292793	-0.042464	0.558402	0.0701402	0.0375212	0.557455	0.152827	0.145375	0.218688	0.130993	0.226142	0.0153766	0.0937483	-0.00213958	0.508908	0.0729829
ANKRD36	2	q11.2	ENST00000289105 // Hs.541894 // ANKRD36 // 375248 // ankyrin repeat domain 36	0.271257	0.186139	0.214186	0.2652	0.261278	0.0163241	-0.00208719	0.29538	0.0320758	0.0315529	0.0475477	0.0191775	0.291959	0.266871	-0.00144729	0.101056	0.132097	-0.021813	0.233264	0.144923	-0.0611206	0.34139	-0.0173698	0.235999	-0.0229443	-0.0101347	-0.0562379	-0.0912539	0.0140215	0.204369	-0.107154	0.103729	0.214218	0.067157	0.297845	0.133453	0.0530922	0.176763	0.203863	-0.183889	-0.00188381
ANKRD36B	2	q11.2	ENST00000258459 // Hs.532921 // ANKRD36B // 57730 // Ankyrin repeat domain 36B	0.221809	0.212823	0.270288	-0.130824	0.14377	0.00932369	1.68e-05	-0.0744586	-0.030609	0.128492	0.00204971	-0.00162726	-0.0665391	-0.0922125	0.302892	0.167976	0.0136844	0.256292	-0.140088	-0.22569	0.030805	-0.0718443	-0.0662267	-0.108323	0.273678	-0.0256918	-0.0631877	0.160909	0.056613	0.00552486	0.134593	0.213312	-0.18502	-0.0266227	-0.167013	0.16752	-0.0465789	0.117817	0.113417	0.0583897	-0.014111
ANKRD36BP1	1	q24.2	ENST00000358576 // Hs.537067 // ANKRD36BP1 // 84832 // Ankyrin repeat domain 36B pseudogene 1	0.188458	0.156561	0.057888	-0.338398	0.148107	-0.0543614	-0.0803733	0.102111	0.185315	0.0867684	-0.006039	0.0499902	0.321544	0.0596147	0.118212	0.187865	0.0882999	0.097827	-0.284463	0.0055151	0.104029	0.18344	-0.0036244	0.124683	0.159718	0.156607	-0.0864045	0.403847	0.003912	0.0312631	0.397651	0.100444	-0.266805	0.0067259	0.0550933	0.0569013	-0.0571137	0.0516396	0.185963	0.382987	0.0209592
ANKRD39	2	q11.2	ENST00000443120 // UTR-3 // 0 // Hs.709507 // ANKRD39 // 51239 // ankyrin repeat domain 39	0.281873	0.239529	0.26261	0.063797	0.0929133	-0.035974	0.0111202	0.236034	-0.02407	0.169898	0.158578	0.0727462	0.189014	0.0996078	0.2539	0.174948	0.128994	0.276239	0.151962	-0.00587067	0.0147092	0.339794	0.118246	0.180333	0.29375	-0.0117743	-0.0617918	0.005383	0.0799255	0.112496	0.000876833	0.20643	0.13325	0.106814	0.135949	0.169763	0.0173432	0.0742692	0.167347	0.0540645	0.0734158
ANKRD40	17	q21.33	ENST00000285243 // Hs.463426 // ANKRD40 // 91369 // ankyrin repeat domain 40	0.092749	0.0962602	0.296854	-0.525165	0.0412273	0.157478	-0.0579255	0.180786	0.220474	-0.179514	0.0204295	0.0291202	-0.072841	0.066014	-0.31555	-0.0552387	0.247428	-0.303746	-0.481433	0.0525741	-0.00804023	0.154652	0.126786	0.119664	-0.266262	0.25691	0.0944936	-0.0275454	0.0151083	0.288562	-0.0769657	0.360569	-0.399082	0.00952986	0.0842722	0.339469	0.133501	0.288558	0.184075	-0.0211736	0.0273492
ANKRD42	11	q14.1	ENST00000260047 // Hs.503438 // ANKRD42 // 338699 // ankyrin repeat domain 42	0.244741	0.237594	-0.229851	0.425953	0.362535	0.098606	-0.097328	-0.305889	0.0177348	0.222446	-0.0515155	-0.325731	-0.186407	0.0674576	0.0667785	0.285335	0.0366534	-0.402744	0.415386	-0.162601	-0.0255985	-0.436578	-0.0927787	0.0744132	-0.197107	-0.0321024	-0.0226785	-0.092933	-0.316971	0.0303793	-0.0986979	-0.205369	0.367449	0.0479747	0.00971202	-0.23902	-0.0883546	-0.0116961	0.374126	-0.0690046	-0.232086
ANKRD44	2	q33.1	ENST00000282272 // Hs.432706 // ANKRD44 // 91526 // ankyrin repeat domain 44	0.404949	0.377962	-0.205475	0.126312	0.460325	0.172224	0.187454	-0.227259	0.18554	0.0255552	-0.334483	-0.0105875	0.108379	0.0836764	0.449632	-0.239099	-0.233351	0.126748	0.107449	-0.0238092	0.00248361	-0.0366728	-0.308652	-0.260849	0.26594	0.198317	0.0635993	0.0651324	-0.0259981	-0.303487	0.0695314	-0.24353	0.100007	0.265523	0.0349719	-0.26128	-0.36187	-0.27931	0.362536	0.0651083	-0.0252283
ANKRD45	1	q25.1	ENST00000333279 // Hs.130054 // ANKRD45 // 339416 // ankyrin repeat domain 45	0.171793	0.135654	0.0810686	-0.393016	0.0633676	-0.114361	-0.168926	0.0363212	0.139306	0.0353238	-0.084634	-0.0891572	0.329162	0.0551176	0.057981	-0.00133545	-0.0349143	0.106732	-0.366342	-0.043955	0.0798156	0.121916	-0.121855	0.0509156	0.0261711	0.124089	-0.180148	0.399029	-0.0847074	-0.0356671	0.376819	0.0629903	-0.295436	-0.0063357	0.0666269	0.052361	-0.129709	-0.0235024	0.127451	0.342083	-0.067571
ANKRD46	8	q22.2	ENST00000335659 // Hs.530199 // ANKRD46 // 157567 // ankyrin repeat domain 46	0.426214	0.287649	0.558747	0.58774	0.283083	0.166176	0.162795	0.538779	0.332443	-0.220183	0.680537	0.207837	0.490129	0.689683	0.419926	-0.231528	-0.179815	0.0926699	0.542604	0.238859	0.238207	0.597262	0.865758	0.670004	0.254038	0.355953	0.0906785	0.611517	0.18761	-0.236701	0.564242	0.61423	0.566911	0.0385612	0.662051	0.576987	0.928403	-0.229443	0.198046	0.525901	0.0511065
ANKRD50	4	q28.1	ENST00000504087 // Hs.480694 // ANKRD50 // 57182 // ankyrin repeat domain 50	0.0765863	0.0611317	0.0777469	0.106975	-0.0311163	-0.39787	-0.360993	-0.368942	-0.0576849	-0.635538	0.0793308	-0.0223538	-0.103218	-0.378121	-0.411647	-0.641593	-0.148492	-0.43741	0.0298026	-0.165226	0.0415337	-0.416176	0.0657113	-0.367596	-0.389327	-0.0602881	-0.262963	-0.0258624	-0.0338584	-0.21117	-0.0115318	0.124941	0.077198	-0.196933	-0.44638	0.0722097	0.0545611	-0.132143	-0.00870648	-0.0055431	-0.12325
ANKRD52	12	q13.3	ENST00000267116 // Hs.524506 // ANKRD52 // 283373 // ankyrin repeat domain 52	-0.00631328	-0.0454916	0.290334	-0.525869	-0.131245	-0.137381	-0.0431537	-0.0102503	0.168676	-0.823042	-0.0678136	-0.0419256	-0.142293	-0.0727252	-0.386821	-0.920109	-0.210258	-0.354991	-0.52711	-0.0743416	-0.107877	-0.0671191	0.0197328	-0.0612611	-0.345763	0.244658	-0.18936	-0.146481	-0.00817256	-0.281038	-0.194936	0.299571	-0.492712	-0.163769	0.0340988	0.27476	0.0699639	-0.303652	-0.11507	-0.0868002	-0.064736
ANKRD53	2	p13.3	ENST00000272421 // Hs.512744 // ANKRD53 // 79998 // ankyrin repeat domain 53	0.364412	0.190232	0.295107	0.0892052	0.223418	0.116352	0.107171	0.012811	-0.017237	0.439464	0.293805	0.165044	0.124602	0.121413	0.245826	0.323834	0.18433	0.190017	0.0342428	0.233418	0.066327	0.0961083	0.250844	0.173535	0.187935	0.0586267	0.0897307	0.0822077	0.111059	0.119123	0.0383555	0.146594	0.0538163	0.0091575	0.155778	0.128808	0.36196	0.0985987	0.26907	0.037628	0.0218048
ANKRD54	22	q13.1	ENST00000215941 // Hs.135259 // ANKRD54 // 129138 // ankyrin repeat domain 54	-0.236749	-0.384066	-0.191977	-0.023542	-0.101481	-0.137231	-0.099432	-0.255367	-0.0734893	-0.039263	0.0171037	-0.509082	-0.116818	-0.346528	-0.36962	-0.262817	-0.213236	-0.36623	0.13456	-0.243307	-0.00138133	-0.351823	0.230231	-0.109481	-0.37319	-0.139207	-0.105247	0.0786873	-0.246382	-0.370303	0.115315	-0.461678	-0.073004	-0.160578	-0.283116	-0.23287	0.338215	-0.244087	-0.115674	0.165349	-0.404508
ANKRD55	5	q11.2	ENST00000341048 // Hs.436214 // ANKRD55 // 79722 // ankyrin repeat domain 55	-0.264259	-0.256057	-0.251133	0.102434	-0.328544	-0.059086	-0.366298	-0.220397	-0.644401	-0.640964	0.475818	-0.020554	-0.0647701	0.0820193	-0.397137	-0.733101	-0.0133084	-0.436171	0.105509	-0.00957773	0.10156	-0.230185	0.375434	0.15713	-0.394984	-0.606404	-0.118993	0.429456	-0.021894	-0.0284328	0.393313	-0.231029	0.104907	-0.448312	0.095241	-0.23796	0.369729	-0.0200007	-0.286907	0.381415	-0.0806151
ANKRD6	6	q15	ENST00000339746 // Hs.702213 // ANKRD6 // 22881 // ankyrin repeat domain 6	-0.221273	-0.220544	-0.229797	0.086585	-0.141909	-0.0148444	0.180715	-0.271474	-0.1244	0.0855924	-0.336017	0.0338472	-0.111696	0.0733916	0.508611	-0.191028	0.0191172	0.439773	-0.0473933	-0.0605645	-0.0627693	-0.299607	-0.315708	0.112102	0.458805	-0.101284	0.0502338	-0.0828062	0.0223243	-0.114431	-0.0437794	-0.213381	0.0720081	-0.0619311	0.102384	-0.211739	-0.363295	-0.162167	-0.102302	-0.0775852	0.0204623
ANKRD7	7	q31.31	ENST00000357099 // Hs.729340 // ANKRD7 // 56311 // ankyrin repeat domain 7	0.225424	-0.239938	0.0747886	0.0823762	0.233886	0.247775	0.221899	0.132012	-0.0466709	0.0780406	0.014599	0.0378077	0.156494	0.0885031	0.472183	0.0538915	0.234476	0.469064	0.0955064	0.0272291	-0.0595275	0.227873	-0.0218186	0.126397	0.458274	-0.053026	0.157398	-0.0866858	0.0295717	0.155402	-0.0905781	-0.231032	0.0708148	0.0803013	0.0914074	-0.115491	-0.0362951	0.173308	0.266421	-0.0657933	0.0519834
ANKRD9	14	q32.31	ENST00000286918 // Hs.432945 // ANKRD9 // 122416 // ankyrin repeat domain 9	0.18209	0.062649	0.03007	-0.249732	0.150079	-0.012038	0.124255	-0.22995	0.255563	0.071142	-0.461166	-0.156897	-0.248409	0.110973	0.248126	0.09904	0.270078	0.193177	-0.093005	-0.083667	-0.112256	-0.077687	-0.284232	0.227836	0.095882	0.316384	-0.13032	-0.160816	-0.048531	0.185917	-0.030726	0.517116	-0.00373	-0.033401	0.000235	0.318224	-0.32963	0.270472	0.088195	-0.167488	-0.102094
ANKS1A	6	p21.31	ENST00000360359 // Hs.656492 // ANKS1A // 23294 // ankyrin repeat and sterile alpha motif domain containing 1A	0.27648	0.249712	0.0958548	0.060237	0.349581	-0.0449652	-0.0246922	0.0313708	0.460731	0.0981687	-0.351842	-0.0100454	-0.143411	0.10335	-0.390108	0.153393	0.207569	-0.385439	0.066723	0.00940301	-0.0558029	0.0277582	-0.365529	0.125887	-0.379159	0.4628	-0.121882	-0.0138006	0.00223282	0.216976	-0.0266614	0.303843	0.0872322	0.395522	0.117214	0.306141	-0.385138	0.225699	0.344359	-0.0376528	-0.0188283
ANKS1B	12	q23.1	ENST00000329257 // Hs.506458 // ANKS1B // 56899 // ankyrin repeat and sterile alpha motif domain containing 1B	-0.442899	-0.429368	-0.309623	0.393138	-0.424439	0.220199	0.207847	0.00428184	-0.0389632	0.0862815	-0.00735724	0.0529485	-0.0868521	0.316027	-0.374361	0.023477	-0.317996	-0.399073	0.376301	-0.0277534	0.0511035	-0.0103693	0.00817393	0.362912	-0.361453	-0.0243643	0.0877775	-0.0437877	0.0313592	-0.447577	-0.0405872	-0.281426	0.362582	-0.157228	0.328149	-0.409931	0.0547833	-0.406561	-0.355825	-0.046328	0.0179796
ANKS3	16	p13.3	ENST00000304283 // Hs.654859 // ANKS3 // 124401 // ankyrin repeat and sterile alpha motif domain containing 3	0.0130549	-0.00469642	-0.17913	0.0423074	0.00531381	-0.127537	0.127796	-0.329176	-0.14747	0.0175034	0.0857883	0.0827502	-0.0980948	0.0963954	-0.237764	-0.262434	0.10782	-0.253411	0.014944	-0.0564332	-0.0475666	-0.240321	0.0508681	0.10704	-0.212067	-0.118202	-0.0336107	-0.147994	0.0926365	0.0825671	-0.119185	-0.171065	0.071516	-0.31456	0.0822989	-0.205642	0.033169	-0.0199617	0.0711937	-0.148486	0.127924
ANKS4B	16	p12.2	ENST00000311620 // Hs.115959 // ANKS4B // 257629 // ankyrin repeat and sterile alpha motif domain containing 4B	-0.0151708	-0.004633	0.241047	0.0379404	-0.0384656	-0.0679678	-0.0553644	0.184208	-0.146999	-0.0375676	-0.0206891	0.00099884	-0.10258	6.67e-05	-0.387621	-0.310169	-0.0121637	-0.399766	0.029715	0.0178825	0.00191396	0.203643	-0.00843928	0.118876	-0.351729	-0.132701	-0.0770512	-0.0394958	0.0153713	0.0126475	-0.125195	0.316418	0.0465183	-0.259475	0.0844453	0.321939	-0.038292	-0.0173113	0.0204975	-0.0677621	-0.0392717
ANKS6	9	q22.33	ENST00000353234 // Hs.406890 // ANKS6 // 203286 // ankyrin repeat and sterile alpha motif domain containing 6	-0.286681	-0.234781	-0.232462	-0.565693	-0.363264	0.158066	0.188989	0.157024	-0.05717	-0.210011	0.219677	0.130507	-0.122765	0.0281111	0.144315	-0.25409	0.375559	0.113577	-0.481306	-0.00221004	-0.161727	0.169954	0.228051	-0.180241	0.172419	-0.0816825	0.110879	-0.595057	0.124872	0.422454	-0.546775	-0.28143	-0.507926	-0.190202	0.0790491	-0.573699	0.127261	0.439765	-0.351483	-0.521975	0.0531462
ANKUB1	3	q25.1	ENST00000383050 // Hs.665988 // ANKUB1 // 389161 // ankyrin repeat and ubiquitin domain containing 1	0.0781938	0.0116714	0.529495	0.0911158	-0.173326	0.768917	0.743326	0.682563	0.594683	0.425446	0.180774	0.274261	0.481334	0.516667	0.45488	0.418027	0.242053	0.448118	0.0978706	0.153787	0.145922	0.690345	0.292409	0.527089	0.419164	0.513608	0.579913	0.44179	0.273123	0.28583	0.454552	0.648585	0.218019	0.415651	0.542488	0.615181	0.229537	0.254608	-0.21232	0.455464	0.19279
ANKZF1	2	q35	ENST00000323348 // Hs.437647 // ANKZF1 // 55139 // ankyrin repeat and zinc finger domain containing 1	0.039661	0.0117625	-0.108896	-0.709847	-0.103432	-0.0182295	0.0414565	-0.742406	0.17241	-0.155627	-0.295819	-0.462916	0.022517	-0.026586	-0.373524	-0.280691	-0.170255	-0.423698	-0.586512	-0.16401	-0.1992	-0.623615	-0.250613	-0.649659	-0.331506	0.225078	-0.154169	-0.223837	-0.679387	-0.310889	-0.017714	0.065186	-0.544337	0.258615	-0.0683305	-0.221856	-0.450941	-0.32546	-0.168605	-0.088645	-0.437251
ANLN	7	p14.2	ENST00000265748 // Hs.62180 // ANLN // 54443 // anillin, actin binding protein	-0.224064	0.0853653	-0.229573	-0.462295	-0.291431	0.375727	0.216005	0.0640203	-0.0274662	0.397867	0.0518339	0.0020606	0.165469	0.0825998	0.133921	0.410804	0.0516204	0.100341	-0.412549	0.0373567	-0.0256491	0.179651	0.00152595	0.134172	0.135611	-0.047729	0.110896	-0.0207503	0.018175	0.0609539	-0.0116687	-0.181166	-0.394186	0.0229241	0.118238	-0.212903	0.0201559	0.115784	-0.22442	-0.0160927	0.0370375
ANO1	11	q13.3	ENST00000316296 // Hs.503074 // ANO1 // 55107 // anoctamin 1, calcium activated chloride channel	0.240686	0.178395	0.291742	0.382155	0.280083	0.0828841	-0.0278847	-0.157629	0.00895517	0.125448	0.0887791	-0.0687297	-0.0308577	0.190919	0.220029	0.0935116	0.0219244	-0.213927	0.29869	-0.0104788	0.0331021	-0.223117	0.0785497	0.196861	0.0136033	-0.0193231	0.0132471	0.00205042	-0.0832004	0.0264112	0.0273282	0.364397	0.296836	0.0328402	0.213905	0.288974	0.0896208	0.0520262	0.250128	-0.0551455	-0.0500684
ANO10	3	p22.1	ENST00000292246 // Hs.656657 // ANO10 // 55129 // anoctamin 10	-0.243794	-0.248159	0.0194203	-0.408623	-0.277495	-0.0608325	-0.0327009	0.0873737	-0.0873081	-0.198852	0.0107757	0.161124	0.116157	0.0495561	0.112203	-0.214705	-0.225247	0.103674	-0.365621	-0.0634674	-0.0522424	0.128249	0.203642	0.118943	0.113218	-0.094728	-0.100366	-0.0611044	0.173989	-0.293871	-0.0498619	-0.167264	-0.365914	-0.233879	0.0363056	-0.202752	0.206097	-0.275542	-0.309405	-0.0446307	0.183131
ANO2	12	p13.31	ENST00000327087 // Hs.148970 // ANO2 // 57101 // anoctamin 2	0.279616	0.299099	0.274968	-0.494821	0.25262	-0.368168	-0.35241	-0.340084	-0.0120498	0.558538	0.496077	0.0608675	-0.292095	-0.250694	-0.378217	0.615173	-0.176043	-0.377252	-0.440367	-0.0800629	-0.0341749	-0.324176	0.446874	0.19321	-0.348478	-0.0178295	-0.26678	-0.00583611	0.0599011	-0.218475	-0.0250432	0.336643	-0.442633	-0.19878	-0.291487	0.335183	0.414096	-0.137525	0.268966	-0.0107039	0.010601
ANO3	11	p14.2	ENST00000537978 // Hs.91791 // ANO3 // 63982 // anoctamin 3	-0.26659	-0.269553	-0.196126	0.0857028	-0.288037	-0.372685	-0.822082	-0.326395	-0.0606367	-0.572992	0.00701385	-0.249536	0.124813	-0.386244	0.362141	-0.639428	-0.199453	0.449188	0.0997215	-0.121008	-0.0297924	-0.358292	-0.00208888	-0.341972	0.366216	-0.0626409	-0.252771	-0.0478809	-0.241504	-0.24428	-0.0518987	-0.194949	0.0838368	0.0255888	-0.355647	-0.218888	-0.0154931	-0.19797	-0.25916	-0.0580558	-0.194971
ANO4	12	q23.1	ENST00000538618 // Hs.58785 // ANO4 // 121601 // anoctamin 4	-0.315128	-0.301019	-0.241513	0.416812	-0.340049	0.463206	0.475352	-0.0264853	0.196316	0.042402	-0.0290794	-0.00890957	-0.0817579	0.280846	-0.443803	0.00181723	-0.181562	-0.415399	0.404022	-0.0455097	0.0544293	-0.0353896	-0.0188823	0.338475	-0.38484	0.194488	0.290994	-0.0192416	-0.0227281	-0.258318	-0.0306988	-0.222931	0.36823	-0.185182	0.291992	-0.242993	0.0260617	-0.20415	-0.270356	-0.0404597	-0.0346296
ANO5	11	p14.3	ENST00000324559 // Hs.154329 // ANO5 // 203859 // anoctamin 5	-0.290015	-0.28825	-0.172144	-0.454037	-0.323723	-0.39893	-0.822655	-0.312643	-0.059997	-0.636485	0.0217484	-0.293296	0.0826109	-0.403403	0.129269	-0.675112	0.0792106	0.213013	-0.407826	-0.0991856	-0.0431987	-0.312894	0.0187543	-0.374177	0.16809	-0.0595567	-0.269562	-0.0534092	-0.26866	0.0515191	-0.0522964	-0.162554	-0.43143	0.0128347	-0.379396	-0.189131	-0.00142303	0.0901648	-0.285316	-0.0378224	-0.189259
ANO6	12	q12	ENST00000320560 // Hs.505339 // ANO6 // 196527 // anoctamin 6	0.053305	0.0550241	-0.21351	-0.386116	0.0220495	0.385227	0.383442	0.0402556	-0.0651188	-0.162769	0.22805	0.0217933	-0.0279003	0.100751	-0.367353	-0.188182	-0.158731	-0.373414	-0.336936	0.0494864	-0.0347046	-0.0140475	0.200075	0.171306	-0.337055	-0.0726585	0.194442	-0.0222225	0.015497	-0.230812	-0.0108874	-0.197298	-0.351049	-0.222409	0.101059	-0.192777	0.266886	-0.191555	0.0559908	-0.0263641	0.0251942
ANO7	2	q37.3	ENST00000402530 // Hs.163909 // ANO7 // 50636 // anoctamin 7	-0.0734897	-0.0290566	0.0822434	-0.592644	-0.140431	-0.398155	-0.35835	-0.290852	0.133968	-0.300701	-0.299237	-0.46081	0.00426619	-0.095979	-0.32996	-0.720045	-0.600279	-0.391514	-0.482109	-0.130611	0.022943	-0.361902	-0.286189	-0.409681	-0.364313	0.125488	-0.258941	0.225382	-0.441616	-0.849828	0.274411	0.0153983	-0.376822	0.307714	0.0537178	0.0394596	-0.373062	-0.776061	-0.241185	0.259102	-0.347998
ANP32A	15	q23	ENST00000267918 // Hs.458747 // ANP32A // 8125 // acidic (leucine-rich) nuclear phosphoprotein 32 family, member A	0.0626345	0.0414004	-0.190554	0.0550981	0.0691571	-0.409591	-0.393485	-0.0898755	-0.122115	-0.176349	0.0609399	0.0503702	-0.385665	0.0924272	-0.329232	-0.264151	-0.202166	-0.343844	0.0332343	0.0191229	0.106712	0.141239	0.0352535	0.190254	-0.293374	-0.0891409	-0.299808	0.315213	0.0872254	-0.198938	0.304865	-0.163311	-0.0026175	-0.119061	0.0553501	-0.207767	-0.0513458	-0.150478	0.102394	0.282364	0.176851
ANP32B	9	q22.33	ENST00000339399 // Hs.730654 // ANP32B // 10541 // acidic (leucine-rich) nuclear phosphoprotein 32 family, member B	-0.283797	-0.269246	-0.223432	-0.586307	-0.371865	0.180991	0.214589	0.19819	-0.110267	-0.230223	0.219722	0.169926	-0.125384	-0.00570067	0.21267	-0.233593	0.434006	0.157236	-0.544817	-0.0318932	-0.119929	0.197984	0.250083	-0.296176	0.173741	-0.108088	0.162342	-0.612472	0.130267	0.513496	-0.575408	-0.366997	-0.47717	-0.207958	0.0890002	-0.601114	0.141182	0.472414	-0.357274	-0.532235	0.0562279
ANP32D	12	q13.11	ENST00000266594 // Hs.532658 // ANP32D // 23519 // acidic (leucine-rich) nuclear phosphoprotein 32 family, member D	-0.0118034	0.0247449	-0.162443	-0.300167	-0.0207404	0.414984	0.447304	-0.0349464	-0.0610894	0.231555	-0.286631	0.0101342	-0.0752058	-0.296117	-0.243499	0.257134	-0.195288	-0.309756	-0.224456	-0.0166312	-0.0287318	-0.0808683	-0.226042	-0.369436	-0.290091	-0.0798588	0.194346	-0.0969175	-0.016324	-0.266261	0.0239072	-0.0567959	-0.302744	-0.182066	-0.348369	-0.151332	-0.148768	-0.171476	-0.0321711	-0.0130618	-0.0115433
ANP32E	1	q21.2	ENST00000314136 // Hs.656466 // ANP32E // 81611 // acidic (leucine-rich) nuclear phosphoprotein 32 family, member E	0.139699	0.142082	0.188384	0.103388	0.116923	-0.0213493	-0.0105058	0.234882	0.118922	0.285552	-0.0102025	0.0477024	0.374552	0.0261323	0.153896	0.250162	0.0818954	0.145917	0.110137	0.0616561	0.108305	0.204581	-0.047964	0.0770646	0.164327	0.142503	-0.0858286	0.350283	0.0310097	-0.0507217	0.435005	0.145453	0.0632803	-0.00762208	0.048693	0.142904	-0.0480582	-0.0522241	0.117759	0.334848	0.00551842
ANPEP	15	q26.1	ENST00000300060 // Hs.1239 // ANPEP // 290 // alanyl (membrane) aminopeptidase	-0.00678832	-0.0440612	-0.22038	0.544721	-0.0148034	-0.4322	-0.394633	-0.10871	-0.0470523	-0.257739	-0.371282	-0.0201475	-0.166307	0.0726327	0.19948	-0.293526	-0.0110546	0.195664	0.508679	-0.0467669	0.109874	0.0661619	-0.24065	0.0624653	0.200715	-0.0761469	-0.319486	0.481613	-0.0296655	-0.0164631	0.504724	-0.107489	0.486205	-0.132806	0.127313	-0.146028	-0.332929	0.00471045	0.0179404	0.486217	0.137877
ANTXR1	2	p13.3	ENST00000303714 // Hs.165859 // ANTXR1 // 84168 // anthrax toxin receptor 1	0.284279	0.243462	0.236508	0.0894278	0.15166	-0.0397889	-0.0426243	-0.261075	-0.0381569	0.343699	0.268857	0.0337443	0.0796368	0.0897865	0.124706	0.358758	0.0537348	0.0868005	0.119059	-0.0225553	-0.0365654	-0.134685	0.205945	0.157749	0.114405	-0.0489307	-0.107889	0.0125498	0.0384919	0.0744825	-0.00562949	0.110383	0.093301	0.0319746	0.0580233	0.106884	0.227469	0.108711	0.165808	-0.0167534	-0.00191011
ANTXR2	4	q21.21	ENST00000403729 // Hs.162963 // ANTXR2 // 118429 // anthrax toxin receptor 2	-0.280916	-0.276997	-0.241515	-0.435345	-0.317226	-0.421694	-0.403506	0.158733	-0.0693969	-0.596466	-0.00600157	-0.0342431	-0.0903925	0.074088	0.0691184	-0.654683	-0.187593	0.0636696	-0.379849	-0.0170691	-0.049203	0.149752	-0.00496057	0.119088	0.0789846	-0.061828	-0.286245	-0.0713515	-0.0319818	-0.23063	-0.0575075	-0.195274	-0.39713	-0.216077	0.037385	-0.246174	0.0308082	-0.183575	-0.270747	-0.0785461	-0.0873501
ANXA1	9	q21.13	ENST00000257497 // Hs.494173 // ANXA1 // 301 // annexin A1	-0.271564	-0.268143	0.300175	0.04412	-0.332511	0.0279352	-0.00394068	0.227507	-0.0482449	-0.19933	0.448024	0.200816	-0.152265	0.0412176	0.487078	-0.281677	0.254763	0.428333	0.0553471	-0.00278387	-0.00893909	0.209995	0.291817	-0.181295	0.450136	-0.0445325	0.0860765	-0.0114504	0.206113	0.314186	-0.0469567	0.257575	0.0316295	-0.219804	0.0788581	0.149034	0.232816	0.338652	-0.377151	-0.0267867	0.0219511
ANXA10	4	q32.3	ENST00000359299 // Hs.188401 // ANXA10 // 11199 // annexin A10	-0.275981	-0.250464	0.0376893	-0.475255	-0.32363	-0.326276	-0.36572	-0.431095	-0.0566321	-0.557258	-0.0337375	-0.0839056	-0.0712737	-0.469875	-0.446147	-0.617137	-0.189085	-0.489585	-0.402882	-0.158962	-0.0952087	-0.471918	-0.0516544	-0.397854	-0.438438	-0.0306182	-0.279011	-0.116766	-0.0818589	-0.312351	-0.0879869	0.0644256	-0.403143	-0.183331	-0.417035	0.0320757	-0.0121831	-0.215156	-0.275777	-0.118212	-0.0810255
ANXA11	10	q22.3	ENST00000265447 // Hs.530291 // ANXA11 // 311 // annexin A11	0.239768	0.234707	-0.108083	0.0469127	-0.000629922	0.4399	0.489574	0.172634	-0.205124	0.068022	0.00446777	-0.181851	0.125145	0.104758	-0.304356	0.104187	-0.217369	0.14448	0.0457278	0.0543675	-0.0321995	0.19538	-0.0305613	0.177081	-0.296308	-0.188914	0.285462	-0.00813352	-0.195556	-0.259863	0.0252663	-0.114699	-0.0871471	0.0235939	0.103512	-0.0341047	-0.0148741	-0.231	-0.123877	-0.0493184	-0.138523
ANXA13	8	q24.13	ENST00000262219 // Hs.181107 // ANXA13 // 312 // annexin A13	0.249112	0.0052988	0.507983	0.766069	0.766853	0.231905	0.209976	0.616472	0.358326	0.172779	0.742564	0.877388	0.258595	0.695731	0.548079	0.169388	0.318794	0.363691	0.737208	0.248222	0.490939	0.673288	0.854212	0.841751	0.544678	0.412715	0.102933	1.00393	0.894304	0.361868	0.979657	0.550764	0.738836	0.0604526	0.675118	0.551034	0.905826	0.346387	0.735527	0.883931	0.74322
ANXA2	15	q22.2	ENST00000396024 // Hs.511605 // ANXA2 // 302 // annexin A2	-0.24855	-0.24509	0.322684	0.412816	-0.312467	-0.31892	-0.315918	-0.111134	-0.0904387	-0.198637	-0.0148171	-0.248162	-0.42586	-0.490489	-0.420501	-0.247987	0.0488048	-0.454446	0.399538	-0.00639363	-0.0357895	0.0633738	-0.0228602	-0.395114	-0.406245	-0.0926772	-0.217406	-0.0266748	-0.22092	0.0795329	-0.0329946	0.339522	0.36232	-0.0792934	-0.443241	0.364171	-0.122797	0.0665273	-0.238721	-0.0268491	-0.00898911
ANXA2P2	9	p13.3	ENST00000426153 // Hs.534301 // ANXA2P2 // 304 // annexin A2 pseudogene 2	-0.108918	-0.186762	-0.028727	0.128365	-0.141557	-0.00849633	0.0904913	0.193955	-0.040928	-0.0229737	0.30283	-0.104139	0.059284	0.088662	0.101151	-0.171174	0.19924	0.066789	0.0953467	0.02905	0.014329	0.242346	0.137297	0.12139	0.199165	-0.0653687	0.042694	0.148654	-0.0511293	0.30087	0.0847937	-0.254711	0.041049	-0.244766	0.163333	-0.107484	0.0600877	0.344436	-0.15158	0.103841	-0.081791
ANXA3	4	q21.21	ENST00000264908 // Hs.480042 // ANXA3 // 306 // annexin A3	-0.298535	-0.33932	-0.236386	0.124704	-0.338768	-0.32697	-0.308787	0.221721	-0.115369	-0.627651	0.0156566	-0.0314744	-0.0561147	-0.0145682	0.061657	-0.652311	-0.176271	0.0917047	0.109629	0.0283992	-0.0374414	0.183956	-0.0328376	0.143863	0.104371	-0.0873079	-0.236902	-0.00273889	-0.0170039	-0.233913	-0.0346643	-0.232536	0.0559521	-0.26191	0.0509358	-0.245307	5.25e-05	-0.221473	-0.253729	-0.0529042	-0.0824614
ANXA4	2	p13.3	ENST00000394295 // Hs.422986 // ANXA4 // 307 // annexin A4	0.230774	0.207135	0.212625	0.113114	0.171497	-0.0164329	-0.0144253	-0.181789	-0.0796491	0.384176	0.261745	0.0395978	0.0870054	0.12756	0.188338	0.3528	0.0804407	0.173349	0.108066	0.0477324	-0.0318274	-0.0582593	0.203881	0.188828	0.179109	-0.0576662	-0.090125	-0.0247635	0.0550971	0.071316	0.0103617	0.0983791	0.135033	0.0153241	0.152414	0.0607182	0.229771	0.0659608	0.162118	-0.0195502	0.0363348
ANXA5	4	q27	ENST00000296511 // Hs.480653 // ANXA5 // 308 // annexin A5	0.0621111	0.0587752	-0.127949	0.118291	0.0266964	-0.368239	-0.370006	-0.362147	-0.104484	-0.593927	-0.0186239	-0.0615333	-0.0914261	-0.42627	-0.452282	-0.617306	-0.225389	-0.468272	0.136377	-0.131555	-0.0562726	-0.379309	-0.0354475	-0.385819	-0.461076	-0.0794234	-0.291015	-0.102604	-0.0450202	-0.287084	-0.0578916	0.0875268	0.0847876	-0.213113	-0.38116	0.0675429	-0.0154547	-0.251312	0.0384828	-0.0690711	-0.0652765
ANXA6	5	q33.1	ENST00000354546 // Hs.412117 // ANXA6 // 309 // annexin A6	0.0148804	0.0355425	-0.00642368	0.103304	0.0203546	-0.0521425	-0.0338787	-0.0182103	0.213876	0.359669	0.436418	0.000330321	0.0490651	0.0843234	0.12524	0.295891	-0.183539	0.16119	0.131862	-0.110533	0.0525594	-0.135467	0.323407	0.0949326	0.123902	0.213483	-0.0823276	0.268275	0.014684	-0.28524	0.32179	0.0971611	-0.00554207	0.111	0.0396942	0.108439	0.355327	-0.208598	0.0532082	0.257369	-0.0515939
ANXA7	10	q22.2	ENST00000372919 // Hs.631827 // ANXA7 // 310 // annexin A7	0.0922022	0.150575	-0.20115	0.269838	0.148808	0.0886264	0.133681	0.111604	-0.166459	0.074273	-0.00919508	-0.225901	0.0936121	-0.00715725	-0.243982	0.0319087	-0.284107	0.053576	0.335352	-0.0938387	-0.164851	0.0292054	-0.041949	0.0558867	-0.217012	-0.148094	0.0325931	-0.0901666	-0.251687	-0.400794	-0.0237052	-0.0219809	0.246397	-0.0797316	-0.0564523	-0.0842947	-0.127902	-0.337802	0.0977131	0.0320741	-0.203486
ANXA8	10	q11.22	ENST00000344416 // UTR-3 // 0 // Hs.535306 // ANXA8 // 653145 // annexin A8	0.147059	0.153895	-0.020729	-0.0138085	0.192881	-0.0474975	-0.10756	0.139602	0.012948	-0.248623	0.440024	-0.182949	0.094301	-0.24411	-0.413498	-0.189371	0.838905	-0.19826	0.0454005	0.0452645	-0.208398	0.247137	0.282975	-0.0878205	-0.158678	0.0508485	-0.082633	-0.454113	-0.183622	0.930489	-0.41304	-0.173525	0.0034925	0.125461	0.250401	-0.0256875	0.380058	0.894128	0.151348	-0.373422	-0.248879
ANXA9	1	q21.3	ENST00000368947 // Hs.3346 // ANXA9 // 8416 // annexin A9	0.289212	0.306434	0.228249	0.0789352	0.30809	0.00416533	0.0638767	0.193713	0.288602	0.470989	0.0338264	0.0724622	0.507961	0.15232	0.358553	0.353362	0.0706522	0.303526	0.0588753	0.146117	0.177018	0.223007	0.0838673	0.18055	0.270107	0.337438	0.0780192	0.513729	0.114836	0.0877052	0.537477	0.230148	0.10171	0.0604638	0.231219	0.349295	0.031009	0.129935	0.270988	0.419515	0.163725
AOAH	7	p14.2	ENST00000258749 // Hs.488007 // AOAH // 313 // acyloxyacyl hydrolase (neutrophil)	-0.279605	-0.0020218	-0.236701	-0.434218	-0.2854	0.354762	0.190196	0.042752	-0.0567224	0.304128	0.00714579	-0.00243714	0.0991344	0.0665812	0.117183	0.359272	0.0516805	0.0840363	-0.383362	-0.00960736	-0.0211792	0.169857	-0.0407363	0.131754	0.0798116	-0.0755261	0.112159	-0.0329347	-0.0208026	0.0696358	-0.0344655	-0.197322	-0.388449	0.0122992	0.0835076	-0.240144	-0.0461507	0.0832692	-0.247111	-0.0471907	-0.00343426
AOC2	17	q21.31	ENST00000253799 // UTR-3 // 0 // Hs.143102 // AOC2 // 314 // amine oxidase, copper containing 2 (retina-specific)	0.179758	0.240142	-0.134462	-0.399154	0.153357	0.246022	-0.0169983	0.343603	-0.0897268	-0.099634	0.113856	-0.547545	-0.397556	0.172534	-0.439789	-0.0335925	0.138336	-0.346764	-0.503524	0.022481	0.0296522	0.152311	0.15102	0.333001	-0.358996	0.0231605	0.215187	-0.019263	-0.500139	0.121184	-0.0180027	-0.217883	-0.317867	0.147614	0.190831	-0.164419	0.174853	0.175368	0.287058	0.0144543	-0.428847
AOC3	17	q21.31	ENST00000308423 // Hs.198241 // AOC3 // 8639 // amine oxidase, copper containing 3 (vascular adhesion protein 1)	0.059047	-0.0419265	-0.272538	-0.449174	0.175694	0.194071	-0.0878605	0.352318	-0.177623	-0.187104	0.077337	-0.491221	-0.457736	0.102077	-0.449382	-0.0751345	0.109713	-0.389465	-0.49721	-0.0032925	0.016887	0.14666	0.0565095	0.087143	-0.414584	-0.028791	0.129573	0.0187675	-0.553561	0.116664	-0.033154	-0.266746	-0.39707	-0.0048445	0.109878	-0.206004	0.0840275	-0.032074	0.283556	-0.115547	-0.418866
AOX1	2	q33.1	ENST00000260930 // Hs.406238 // AOX1 // 316 // aldehyde oxidase 1	0.423628	0.383158	-0.200343	0.0301875	0.43767	0.15898	0.148279	-0.603474	0.239999	0.189605	-0.338521	-0.00862549	0.121245	0.0504939	-0.376391	-0.0703022	0.045815	-0.414635	-0.0970897	-0.124344	-0.0766639	-0.485602	-0.340077	-0.407919	-0.414955	0.243945	0.0552715	-0.0883609	-0.00317622	0.0346201	-0.0614839	-0.216767	0.0901156	0.279082	0.0320554	-0.263244	-0.36397	0.0715839	0.34774	-0.0733057	-0.0155835
AOX2P	2	q33.1	ENST00000467645 //--- // AOX2P // 344454 // aldehyde oxidase 2 pseudogene	0.445047	0.398017	-0.246437	-0.0209275	0.477777	0.232622	0.218994	-0.660787	0.179372	0.296161	-0.344433	0.0324282	0.0721078	0.0311083	-0.435647	0.0535294	-0.00806379	-0.512494	-0.0900569	-0.115935	-0.0549462	-0.54576	-0.334105	-0.36208	-0.424481	0.193845	0.0931831	-0.119022	0.000386971	-0.056258	-0.0339981	-0.295996	0.0647375	0.217881	-0.00610965	-0.321807	-0.340645	-0.0263437	0.35106	-0.0660487	0.00949691
AP1AR	4	q25	ENST00000274000 // Hs.435991 // AP1AR // 55435 // adaptor-related protein complex 1 associated regulatory protein	-0.326436	-0.277665	0.0601607	-0.470866	-0.363594	-0.410111	-0.373917	-0.425653	-0.121922	-0.628876	-0.0156564	-0.0770528	-0.179	-0.508972	-0.488541	-0.728327	-0.231398	-0.523263	-0.440086	-0.169748	-0.0797109	-0.429842	-0.0628447	-0.434345	-0.458336	-0.119584	-0.275025	-0.0968197	-0.0495458	-0.278151	-0.0784749	0.0375204	-0.426063	-0.268578	-0.468946	0.0248417	-0.0513708	-0.245263	-0.295558	-0.049983	-0.105274
AP1B1	22	q12.2	ENST00000317368 // Hs.368794 // AP1B1 // 162 // adaptor-related protein complex 1, beta 1 subunit	-0.270138	-0.256803	-0.289207	-0.0300221	-0.10968	-0.107409	-0.0692246	-0.392555	-0.0772969	-0.205087	-1.01932	-0.481031	-0.151968	-0.401133	-0.700171	-0.252636	-0.182473	-0.693164	0.0726983	-0.171204	-0.092129	-0.390015	-0.422971	-0.194	-0.690154	-0.0935497	-0.208095	-0.145307	-0.50799	-0.281599	-0.121186	-0.219454	0.056126	-0.190906	-0.357446	-0.282477	-0.308701	-0.259889	-0.0822341	-0.0986534	-0.386665
AP1G1	16	q22.2	ENST00000299980 // Hs.461253 // AP1G1 // 164 // adaptor-related protein complex 1, gamma 1 subunit	0.189299	0.165316	0.192803	-0.00644575	0.221554	-0.123924	-0.0982324	-0.378261	-0.199484	-0.263894	-0.843724	-0.498453	-0.15593	-0.487871	-0.358463	-0.314077	-0.351951	-0.378235	0.00249759	-0.172505	-0.0719182	-0.421697	-0.748352	-0.426097	-0.354751	-0.19294	-0.150199	-0.126707	-0.48601	-0.534378	-0.041002	0.0799874	-0.0103498	-0.292124	-0.433781	0.0702325	-0.872308	-0.499654	0.13054	-0.0553577	-0.424495
AP1G2	14	q11.2	ENST00000308724 // Hs.343244 // AP1G2 // 8906 // adaptor-related protein complex 1, gamma 2 subunit	-0.187463	-0.204783	-0.258149	0.23017	-0.16612	0.105677	0.0685519	0.0509658	0.228556	0.243483	0.0057457	0.01812	-0.122987	0.204741	0.270385	0.146242	-0.175291	0.152127	0.171378	0.109956	-0.0797932	0.0168108	-0.0518638	0.266818	0.1676	0.181801	0.0772042	-0.504798	0.0707156	-0.255118	-0.483321	-0.0603769	0.0737959	0.0202813	0.201374	-0.18019	0.021004	-0.181124	-0.24219	-0.45251	0.0604431
AP1M1	19	p13.11	ENST00000291439 // Hs.71040 // AP1M1 // 8907 // adaptor-related protein complex 1, mu 1 subunit	0.132149	-0.0341522	-0.215897	0.000895303	0.163599	0.0603611	0.145231	-0.277436	0.131933	0.0139393	0.0336386	0.318461	0.221934	0.0980512	0.171885	0.0647313	0.0235998	0.155106	0.0323515	-0.0286018	-0.123238	-0.300198	0.0541332	0.0770724	0.134109	0.0986123	-0.00925697	-0.130549	0.316831	-0.0344918	-0.125912	-0.200379	0.0585152	0.0261912	0.0625624	-0.191075	-0.0301884	0.00823573	0.0881568	-0.045453	0.313888
AP1M2	19	p13.2	ENST00000250244 // Hs.18894 // AP1M2 // 10053 // adaptor-related protein complex 1, mu 2 subunit	-0.260136	-0.113457	-0.176589	0.0205025	-0.364319	0.140265	0.230018	-0.218901	0.328483	-0.232198	-0.0181975	-0.313179	-0.0805495	0.080786	0.20193	-0.572222	0.218861	0.185011	-0.0532975	-0.046161	0.036295	-0.374423	0.138467	0.038425	0.241019	0.34727	0.045447	-0.126521	-0.328796	0.212334	-0.206972	-0.280902	0.0144375	0.415951	-0.015654	-0.175955	-0.067926	0.115252	-0.368102	-0.04112	-0.275882
AP1S1	7	q22.1	ENST00000337619 // Hs.489365 // AP1S1 // 1174 // adaptor-related protein complex 1, sigma 1 subunit	0.261532	-0.16854	0.561695	-0.457042	0.32097	0.270427	0.23404	0.169293	-0.130554	0.313836	0.0807974	0.143202	0.267703	-0.390317	0.263723	0.0446813	0.255894	0.291501	-0.304836	0.0933805	0.0478111	0.284856	0.152391	-0.298642	0.372902	-0.108629	0.217587	-0.0945733	0.166113	0.203929	0.0243788	0.335955	-0.329582	0.0814352	-0.235779	0.504796	0.0490275	0.123439	0.348414	-0.0635594	0.131904
AP1S2	X	p22.2	ENST00000329235 // Hs.653504 // AP1S2 // 8905 // adaptor-related protein complex 1, sigma 2 subunit	-0.792476	-0.748102	-0.648699	-0.370943	-0.843895	-0.344633	-0.328181	0.431744	-0.103353	-0.633316	0.293328	-0.611575	-0.126928	-0.506135	0.18342	-0.746578	0.0264288	0.138936	-0.345417	0.123742	-0.153149	0.526078	0.220011	-0.390881	0.16287	-0.060884	-0.248871	-0.593231	-0.556548	0.09701	-0.532246	-0.70234	-0.356714	-0.620543	-0.438481	-0.754721	0.266965	0.0633278	-0.77153	-0.500694	-0.468993
AP1S3	2	q36.1	ENST00000334271 // Hs.632555 // AP1S3 // 130340 // adaptor-related protein complex 1, sigma 3 subunit	0.076599	0.0938311	0.0703933	-0.482682	0.0207671	-0.412272	-0.360172	-0.595375	0.132745	0.514906	-0.395036	-0.618984	0.125514	-0.00874374	-0.402805	0.0370275	-0.289735	-0.41109	-0.455254	-0.0831324	0.0850198	-0.490309	-0.290584	-0.450808	-0.385147	0.157461	-0.271376	0.211617	-0.614131	-0.386367	0.227379	0.132127	-0.366257	0.30437	0.0253297	0.0223446	-0.414029	-0.418803	-0.0270293	0.242172	-0.464755
AP2A1	19	q13.33	ENST00000354293 // Hs.467125 // AP2A1 // 160 // adaptor-related protein complex 2, alpha 1 subunit	0.193673	0.115157	0.311414	0.0422267	0.148775	0.104374	0.14156	0.0723476	0.136629	0.100642	0.103151	0.475693	0.254275	0.114771	-0.229026	0.0108433	0.0540444	-0.179164	0.0280209	0.013589	0.10836	0.141032	-0.134482	0.17647	-0.207086	0.160837	-0.0869943	0.148794	0.49179	-0.0215302	0.197793	0.30329	0.0621314	0.0147318	0.131464	0.225266	-0.188703	0.00528893	0.108186	0.188677	0.394775
AP2A2	11	p15.5	ENST00000329626 // Hs.19121 // AP2A2 // 161 // adaptor-related protein complex 2, alpha 2 subunit	0.0518614	0.0195808	-0.176517	-0.415248	-0.0467964	-0.369234	-0.774773	-0.1865	-0.0354438	-0.171712	0.100838	-0.122907	0.0915438	-0.333248	-0.259365	-0.208557	-0.397271	-0.236156	-0.414034	-0.0312241	-0.0341348	-0.209756	0.0877502	-0.353712	-0.236118	-0.0588797	-0.225497	-0.482544	-0.131197	-0.553635	-0.428738	-0.169877	-0.371728	0.132859	-0.303419	-0.200989	0.0813801	-0.558857	-0.0390942	-0.393145	-0.109739
AP2B1	17	q12	ENST00000262325 // Hs.514819 // AP2B1 // 163 // adaptor-related protein complex 2, beta 1 subunit	0.238663	0.229949	-0.212637	-0.453637	0.146133	0.169875	-0.0115233	-0.489861	-0.0781169	-0.188353	0.0442272	-0.534546	-0.353895	0.0364302	-0.35111	-0.190818	-0.199278	-0.369209	-0.422652	-0.068165	0.000646441	-0.521136	0.00556008	0.109204	-0.324302	-0.110447	0.0776907	-0.00309517	-0.543238	-0.281453	-0.00486876	-0.161942	-0.407896	-0.122836	0.0644447	-0.219351	0.0137258	-0.250317	0.219799	-0.0179497	-0.438132
AP2M1	3	q27.1	ENST00000292807 // Hs.518460 // AP2M1 // 1173 // adaptor-related protein complex 2, mu 1 subunit	0.288334	0.056845	0.942955	0.429428	0.209684	0.63808	0.643288	0.53559	0.641147	0.726666	0.384756	0.657973	0.699677	0.588699	0.734907	0.684519	0.291824	0.614911	0.468633	0.244975	0.238027	0.676038	0.536154	0.538504	0.650124	0.685114	0.459796	0.475853	0.550498	0.16713	0.614166	0.998072	0.50135	0.60163	0.53745	1.0249	0.43897	0.354366	0.0790475	0.66581	0.609531
AP2S1	19	q13.32	ENST00000263270 // Hs.119591 // AP2S1 // 1175 // adaptor-related protein complex 2, sigma 1 subunit	0.254861	0.221918	0.247957	-0.0381806	0.14151	0.0526326	0.112029	-0.00843305	0.128487	0.0494026	-0.280136	-0.137732	0.0919215	0.0746893	0.0528783	0.0221726	0.198186	-0.226459	-0.290876	0.0158994	0.0151301	0.027802	-0.292181	0.0566707	-0.106713	0.11729	-0.0370352	-0.0686657	-0.115234	0.225486	-0.0799153	0.34145	-0.187172	0.055192	0.106435	0.234593	-0.251157	0.203001	0.095059	-0.0581976	-0.133416
AP3B1	5	q14.1	ENST00000255194 // Hs.532091 // AP3B1 // 8546 // adaptor-related protein complex 3, beta 1 subunit	0.0245873	0.0369505	-0.707935	-0.405923	0.00449936	-0.0925457	-0.377445	-0.256109	-0.596746	-0.52155	0.339736	-0.0329081	-0.148765	-0.436871	-0.426513	-0.298069	-0.240006	-0.447279	-0.359173	-0.114111	-0.0795548	-0.318993	0.252509	-0.39553	-0.434603	-0.601506	-0.159611	-0.120805	-0.068059	-0.288013	-0.0893764	-0.737054	-0.358954	-0.38622	-0.400869	-0.745095	0.256543	-0.256225	0.0120875	-0.0930127	-0.0717109
AP3B2	15	q25.2	ENST00000261722 // Hs.199593 // AP3B2 // 8120 // adaptor-related protein complex 3, beta 2 subunit	0.0457879	0.0202383	-0.186512	0.58025	0.0295899	-0.442809	-0.420378	-0.0532712	-0.0489939	-0.204574	-0.310429	0.0625628	-0.355293	0.0302729	0.166248	-0.23902	0.0758343	0.155258	0.560974	0.00682825	0.138942	0.126843	-0.351762	0.134006	0.162676	-0.0608934	-0.314039	0.48519	0.0422368	0.0646271	0.46082	-0.219	0.582898	-0.0752539	0.0569703	-0.209307	-0.361287	0.0547637	0.102822	0.39482	0.165298
AP3D1	19	p13.3	ENST00000343722 // Hs.512815 // AP3D1 // 8943 // adaptor-related protein complex 3, delta 1 subunit	-0.308797	-0.329359	-0.31833	-0.460009	-0.357846	-0.472627	-0.416272	-0.18549	-0.0992031	-0.121234	0.0209119	-0.155957	-0.0861757	-0.333179	-0.291078	-0.199033	-0.236563	-0.336326	-0.427541	-0.0370915	-0.213838	-0.222667	-0.00375414	-0.34282	-0.33892	-0.122011	-0.352337	-0.617878	-0.13703	-0.434826	-0.495773	-0.27709	-0.426706	-0.183169	-0.344998	-0.298327	-0.0488981	-0.300222	-0.347696	-0.452364	-0.125986
AP3M1	10	q22.2	ENST00000355264 // Hs.500104 // AP3M1 // 26985 // adaptor-related protein complex 3, mu 1 subunit	0.152479	0.135781	-0.118919	0.359964	0.194076	0.143895	0.162097	0.137893	-0.190351	0.130255	-0.0878349	-0.206358	0.0106132	0.008872	-0.391594	0.0422212	-0.272013	0.0244165	0.346654	0.012508	-0.0960626	0.178164	-0.0722356	0.140975	-0.358651	-0.14015	-0.0294942	-0.0880999	-0.236926	-0.362254	-0.0913587	-0.26678	0.298052	-0.00991582	0.00755347	-0.0877796	-0.109054	-0.383045	0.113714	-0.0806427	-0.187258
AP3M2	8	p11.21	ENST00000174653 // Hs.654529 // AP3M2 // 10947 // adaptor-related protein complex 3, mu 2 subunit	0.224073	0.0561249	0.293187	0.0802616	0.27272	-0.0868969	-0.167878	0.171628	0.24599	-0.190713	0.984456	0.181644	-0.0587179	-0.310413	0.504732	-0.22147	-0.218359	0.439289	0.0850138	0.0154025	-0.164047	0.17843	0.802094	-0.368511	0.442032	0.289822	-0.087461	-0.461999	0.198755	-0.382852	-0.465814	0.276312	0.0873468	-0.0220506	-0.260612	0.244885	0.924651	-0.29518	0.246309	-0.527318	0.0364242
AP3S1	5	q22.3	ENST00000316788 // Hs.740519 // AP3S1 // 1176 // adaptor-related protein complex 3, sigma 1 subunit	-0.248633	-0.254353	0.00602803	-0.400013	-0.261929	0.612743	0.680662	-0.249357	0.182237	0.131171	0.417361	0.0231428	-0.0761127	-0.452987	-0.478535	0.0407937	-0.191135	-0.536331	-0.354086	-0.0732509	0.103074	-0.256337	0.275161	-0.384131	-0.490627	0.193592	0.441885	0.299816	0.020957	-0.229863	0.294912	0.0840915	-0.348188	0.207156	-0.388098	0.0840471	0.279116	-0.204127	-0.278881	0.237084	-0.0027038
AP3S2	15	q26.1	ENST00000336418 // Hs.632161 // AP3S2 // 10239 // adaptor-related protein complex 3, sigma 2 subunit	0.0371896	0.0440729	-0.182669	0.652205	-0.0124049	-0.388029	-0.372107	-0.101444	-0.032045	-0.228287	-0.341963	0.0666322	-0.084932	0.0198343	0.199004	-0.278063	0.014286	0.191019	0.639821	-0.0120368	0.114991	0.0660179	-0.265442	0.104875	0.217642	-0.00263439	-0.262432	0.522984	0.0355756	0.0757141	0.484097	-0.178849	0.651693	-0.0366137	0.051309	-0.165642	-0.331846	0.0382887	0.0646589	0.490343	0.226936
AP4B1	1	p13.2	ENST00000256658 // Hs.515048 // AP4B1 // 10717 // adaptor-related protein complex 4, beta 1 subunit	-0.0242047	-0.0629535	-0.000616333	0.099142	0.106884	0.0277752	0.0977453	0.272979	0.27122	0.23892	0.0939947	0.335156	0.0410573	-0.453163	-0.434735	0.043879	0.132612	-0.447926	0.0216717	0.130339	-0.111727	0.270713	0.0978673	-0.358386	-0.292546	0.186813	0.00470833	-0.464759	0.271478	0.0866943	-0.520294	0.161628	0.0661158	0.0290632	-0.352251	0.0474965	0.109728	0.0735097	0.0606038	-0.451526	0.232609
AP4E1	15	q21.2	ENST00000261842 // Hs.413366 // AP4E1 // 23431 // adaptor-related protein complex 4, epsilon 1 subunit	-0.286756	-0.270109	-0.206486	-0.400937	-0.323452	-0.401414	-0.380609	-0.0906635	-0.138588	-0.226087	-0.0485219	-0.263831	-0.450765	-0.460564	-0.409049	-0.221195	-0.223348	-0.423728	-0.381411	-0.00505953	-0.0587897	0.0459515	-0.0722373	-0.390471	-0.441922	-0.132746	-0.296392	-0.0932703	-0.233747	-0.291843	-0.0633226	-0.246769	-0.385162	-0.100642	-0.372044	-0.229294	-0.158201	-0.317228	-0.258784	-0.0368279	-0.0641347
AP4S1	14	q12	ENST00000216366 // Hs.293411 // AP4S1 // 11154 // adaptor-related protein complex 4, sigma 1 subunit	-0.294602	-0.257702	-0.209368	0.0765833	-0.326706	-0.077585	-0.0812385	-0.0724241	0.137773	0.0171811	-0.0628892	-0.0582291	0.739681	-0.0291471	0.11716	-0.0613412	-0.264249	0.0993816	0.0911844	-0.0467441	-0.150853	-0.0894168	-0.0572801	0.0786692	0.107516	0.126648	-0.033395	-0.670304	-0.0440981	-0.339118	-0.537007	-0.213434	0.0960354	-0.00488111	0.0151288	-0.211313	-0.154827	-0.382586	-0.375902	-0.518842	-0.058541
AP5M1	14	q22.3	ENST00000261558 // Hs.597349 // AP5M1 // 55745 // adaptor-related protein complex 5, mu 1 subunit	0.0767295	0.0776665	0.182098	-0.460196	0.0432156	0.0016768	0.0410821	-0.226021	0.361705	0.266811	0.0324132	0.0553352	0.119365	0.0414136	-0.419572	0.249412	0.283473	-0.429321	-0.423996	0.0121111	-0.106982	-0.162007	0.00188477	0.153285	-0.415394	0.341241	0.0579405	-0.531876	0.0157679	0.308146	-0.513746	0.268587	-0.390683	0.0198648	0.0450106	0.212734	0.0546259	0.3486	-0.00533388	-0.446774	0.0478538
AP5S1	20	p13	ENST00000246041 // Hs.104806 // AP5S1 // 55317 // adaptor-related protein complex 5, sigma 1 subunit	0.434129	0.343339	0.0676339	-0.49268	0.378733	-0.272553	-0.053105	0.416116	0.370505	0.0972464	0.226177	-0.00767632	0.549188	0.110197	-0.332871	0.0819229	0.057466	-0.407903	-0.468595	0.08017	0.0268315	0.397112	0.287963	0.121874	-0.291397	0.400755	0.0245069	0.151265	-0.00209314	0.0675147	-0.0670443	0.135504	-0.479638	0.39584	0.113884	-0.0756079	0.143816	0.00196957	0.377635	-0.0337345	-0.00718418
AP5Z1	7	p22.1	ENST00000348624 // Hs.558440 // AP5Z1 // 9907 // adaptor-related protein complex 5, zeta 1 subunit	-0.188616	0.0292698	0.145831	-0.493532	-0.0826664	-0.458951	-0.207203	-0.135093	0.0121172	0.207093	0.125715	0.192708	0.235851	-0.165679	-0.22417	0.195121	0.145921	-0.267815	-0.382177	0.0955238	0.215405	0.205949	0.102612	-0.203527	-0.184856	0.10879	-0.160581	0.528157	0.220989	0.108896	0.632895	0.21221	-0.215272	0.0684818	-0.301146	0.241009	0.144161	0.16107	-0.14045	0.582857	0.182149
APAF1	12	q23.1	ENST00000333991 // Hs.552567 // APAF1 // 317 // apoptotic peptidase activating factor 1	0.300108	0.275815	-0.175371	0.485374	0.288699	0.196632	0.199918	-0.00967094	-0.442783	0.0897314	0.00164761	0.372381	-0.0890585	0.290565	-0.347744	0.0271804	-0.21251	-0.350023	0.413392	0.000244655	0.0706447	0.0215018	0.0296801	0.32751	-0.28912	-0.487538	0.0816278	0.0150048	0.339171	-0.268609	-0.00272439	-0.11309	0.410748	-0.175483	0.312731	-0.180211	0.0866306	-0.235835	0.282435	0.01813	0.331321
APBA1	9	q21.11	ENST00000265381 // Hs.171939 // APBA1 // 320 // amyloid beta (A4) precursor protein-binding, family A, member 1	0.0616992	0.0513904	0.288918	0.142988	0.0298243	-0.0201413	-0.0221305	0.187973	-0.0686394	-0.183483	0.424089	0.220137	-0.125712	0.0388798	0.1511	-0.195242	0.273148	0.134989	0.123962	0.0313353	-0.015325	0.189641	0.233542	0.142188	0.121879	-0.0701725	0.0770646	-0.0285317	0.20948	0.314332	-0.0269928	0.313709	0.110563	-0.21954	0.0623956	0.200007	0.167626	0.312554	0.0320474	-0.0412149	0.0589562
APBA2	15	q13.1	ENST00000219865 // Hs.618112 // APBA2 // 321 // amyloid beta (A4) precursor protein-binding, family A, member 2	-0.305266	-0.286769	-0.190592	0.431189	-0.324889	-0.367319	-0.345138	0.106333	-0.102791	-0.18831	0.0469138	-0.191095	-0.383694	0.0917999	0.160512	-0.163442	0.219071	0.140359	-0.208078	0.0324492	-0.022805	0.196012	0.00722499	0.144203	0.182939	-0.100231	-0.237366	-0.0338714	-0.193402	0.190396	-0.00558893	-0.158773	-0.0652728	-0.0749068	0.109004	-0.151854	-0.13001	0.199474	-0.193442	-0.0267985	0.0253779
APBB1	11	p15.4	ENST00000299402 // Hs.372840 // APBB1 // 322 // amyloid beta (A4) precursor protein-binding, family B, member 1 (Fe65)	-0.230951	-0.237043	-0.283577	-0.634683	-0.428069	-0.508588	-0.942135	-0.440138	-0.108895	-0.765199	-0.00973845	-0.258935	0.104398	-0.485023	-0.405947	-0.86007	-0.151818	-0.424494	-0.553097	-0.112667	-0.214976	-0.402586	-0.0327356	-0.457126	-0.44539	-0.0322611	-0.323334	-0.665062	-0.264141	-0.286973	-0.603479	-0.240769	-0.54808	0.0685511	-0.46112	-0.292196	-0.129017	-0.232616	-0.290477	-0.55475	-0.237773
APBB1IP	10	p12.1	ENST00000376236 // Hs.310421 // APBB1IP // 54518 // amyloid beta (A4) precursor protein-binding, family B, member 1 interacting protein	-0.0344663	-0.0339201	0.20373	0.0982197	-0.0367108	0.0967125	0.319858	0.167307	-0.196862	-0.251667	0.179851	-0.249396	0.318933	0.273616	0.111902	-0.259895	-0.260573	0.0760188	0.0814088	-0.00643409	-0.192806	0.149958	0.144893	0.349625	0.103907	-0.20137	0.0249088	-0.656261	-0.257611	-0.353464	-0.541907	-0.196711	0.0975473	-0.139056	0.277125	-0.112068	0.13687	-0.348154	-0.101256	-0.485999	-0.0225032
APBB2	4	p13	ENST00000295974 // Hs.479602 // APBB2 // 323 // amyloid beta (A4) precursor protein-binding, family B, member 2	0.0617866	0.0339247	-0.239101	-0.450421	0.0149053	0.275793	0.289	0.182045	-0.102439	-0.667513	-0.348277	0.0151024	-0.099186	-0.441705	-0.375021	-0.767762	-0.0147391	-0.418279	-0.403402	0.0140701	-0.046328	0.18527	-0.311171	-0.406568	-0.373568	-0.0962347	0.123384	-0.0744173	0.00694027	-0.00417933	-0.0399468	-0.203342	-0.335189	-0.263519	-0.40206	-0.222504	-0.364789	0.0127594	0.0260194	-0.0544286	-0.00721913
APBB3	5	q31.3	ENST00000507279 // Hs.529449 // APBB3 // 10307 // amyloid beta (A4) precursor protein-binding, family B, member 3	-0.236045	-0.194439	-0.0324465	0.0734794	-0.289184	0.217005	0.338769	0.0200222	0.293885	0.331471	0.396639	-0.0261123	0.055947	0.106331	0.105912	0.240731	-0.226938	0.121234	0.117918	-0.101738	0.0352597	-0.148637	0.301801	0.135028	0.0838753	0.285012	0.166603	0.276702	-0.0516272	-0.244508	0.273398	0.0365369	0.126416	0.211246	0.0577572	0.0469326	0.321205	-0.200475	-0.276919	0.263755	-0.0536917
APC	5	q22.2	ENST00000257430 // Hs.158932 // APC // 324 // adenomatous polyposis coli	-0.292291	-0.283332	0.0678528	-0.378745	-0.300667	-0.0394615	-0.0111708	-0.228742	0.0941219	0.0206146	0.412664	-0.0229716	-0.149812	-0.429312	-0.350124	-0.0468665	-0.216841	-0.378147	-0.358059	-0.0848153	0.0675911	-0.265752	0.304993	-0.392288	-0.348587	0.101592	-0.0671414	0.278072	-0.0207532	-0.294389	0.241377	0.129232	-0.333029	0.112958	-0.376721	0.0943001	0.306635	-0.22234	-0.275913	0.201173	-0.0437373
APCDD1	18	p11.22	ENST00000355285 // Hs.293274 // APCDD1 // 147495 // adenomatosis polyposis coli down-regulated 1	-0.253006	-0.261508	0.0423075	-0.509598	-0.346965	-8e-05	0.235932	-0.00372817	0.259368	0.129304	-0.307297	-0.194459	-0.140053	-0.444617	0.120311	0.215372	0.279177	0.0854114	-0.471998	0.0111502	0.0945408	0.150749	0.113357	-0.383757	0.110586	0.301523	0.00465446	0.382761	-0.185388	0.362108	0.327208	0.143006	-0.458885	0.154583	-0.379964	0.220944	-0.00841839	0.397373	-0.287611	0.314862	-0.218782
APCDD1L	20	q13.32	ENST00000371149 // Hs.119286 // APCDD1L // 164284 // adenomatosis polyposis coli down-regulated 1-like	0.595224	0.517648	0.583074	0.284793	0.585069	0.494223	0.41855	0.543432	0.193444	0.0772463	0.255858	0.0506312	0.200969	0.11855	0.147823	0.199537	0.100544	0.176955	0.0930809	0.150524	0.31728	0.54887	0.199061	0.203868	0.142102	0.214481	0.37995	0.888269	0.0615493	0.0893065	0.719226	0.773476	0.000525289	0.137117	0.0876038	0.676135	0.30669	0.0968547	0.613906	0.679687	0.0126826
APCS	1	q23.2	ENST00000255040 // Hs.507080 // APCS // 325 // amyloid P component, serum	0.318928	0.307672	0.0975182	0.10995	0.233071	0.00897958	-0.00663039	0.253256	0.270308	0.0857312	0.0585383	-0.00648723	0.477037	0.0914768	0.459303	0.111179	0.0659596	0.440184	0.123122	0.0250684	0.196703	0.310646	0.0259852	0.167004	0.467486	0.263588	-0.0668781	0.571401	-0.0134155	0.101196	0.539117	0.126716	0.107325	0.096841	0.0368878	0.155186	0.0680324	0.132496	0.237495	0.454192	0.000655774
APEH	3	p21.31	ENST00000296456 // Hs.517969 // APEH // 327 // N-acylaminoacyl-peptide hydrolase	0.132992	0.194013	-0.0634442	0.0759553	0.189532	0.024404	0.0101808	0.182727	0.0873395	-0.161708	0.1119	0.266091	0.355898	0.359227	0.402728	-0.174669	-0.0600832	0.311898	0.20259	0.106193	0.00134783	0.246829	0.317143	0.308869	0.320443	0.0520482	-0.0075455	0.0634793	0.280196	-0.217711	-0.0247005	-0.0261455	0.166263	-0.00148167	0.267025	-0.0631952	0.150585	-0.0759183	0.0784557	0.115488	0.346597
APEX2	X	p11.21	ENST00000374987 // Hs.659558 // APEX2 // 27301 // APEX nuclease (apurinic/apyrimidinic endonuclease) 2	-0.198572	-0.259786	-0.575587	0.223024	-0.210385	-0.326599	-0.258616	-0.129694	-0.0890757	-0.15542	0.305435	-0.664692	0.183587	-0.477359	0.087261	-0.199008	0.762689	0.0671615	0.206111	-0.0787169	-0.182347	-0.0775589	0.255259	-0.297532	0.0827751	-0.0012526	-0.219303	-0.539159	-0.461021	0.854969	-0.515506	-0.169348	0.220684	-0.508908	-0.437161	-0.152595	0.290057	0.885657	-0.178764	-0.557908	-0.27425
APH1A	1	q21.2	ENST00000369109 // Hs.108408 // APH1A // 51107 // anterior pharynx defective 1 homolog A (C. elegans)	0.235612	0.108345	0.175146	0.060512	0.230706	0.0174165	-0.0101745	0.202718	0.3107	0.451954	0.044139	0.0404845	0.626257	0.101142	0.125226	0.381448	0.0941395	0.154759	0.171794	-0.0466035	0.242386	0.246561	-0.0424845	0.140427	0.147273	0.27133	-0.0443915	0.483214	0.070545	0.121569	0.483005	0.193872	0.090538	0.14249	0.141595	0.123367	0.031267	0.0192325	0.120003	0.517435	0.000365
APH1B	15	q22.2	ENST00000261879 // Hs.511703 // APH1B // 83464 // anterior pharynx defective 1 homolog B (C. elegans)	-0.283079	-0.247115	0.347681	0.418734	-0.255794	-0.290269	-0.241577	-0.0471876	-0.0662625	-0.633413	0.00817393	-0.197061	-0.273302	-0.358901	-0.411306	-0.739792	-0.231882	-0.397579	0.390599	0.105655	-0.0357564	0.161448	-0.033593	-0.287107	-0.414368	-0.0328178	-0.216337	-0.003427	-0.188427	-0.232418	-0.0189049	0.34781	0.409561	-0.0537811	-0.242788	0.370405	-0.188202	-0.213052	-0.196171	-0.0204753	0.0622107
API5	11	p12	ENST00000378852 // Hs.435771 // API5 // 8539 // apoptosis inhibitor 5	-0.264808	-0.253592	-0.23834	0.146244	-0.251061	0.470804	0.438055	-0.353472	-0.039206	-0.192805	0.031091	-0.267927	0.155558	0.0822313	-0.420978	-0.171849	-0.224141	-0.403176	0.120879	-0.0353612	0.0966407	-0.295498	0.0334431	0.16727	-0.354602	-0.069911	0.37528	0.286453	-0.236913	-0.274844	0.25691	-0.185869	0.135415	0.0705964	0.0905208	-0.2235	0.0327796	-0.273853	-0.180547	0.242726	-0.17948
APIP	11	p13	ENST00000278359 // Hs.447794 // APIP // 51074 // APAF1 interacting protein	-0.326669	-0.339057	-0.205261	0.124704	-0.362107	0.383573	0.351652	-0.309395	-0.0650814	-0.588552	0.0193292	-0.20633	0.0792553	-0.404747	-0.338365	-0.648382	-0.192036	-0.367818	0.105701	-0.120638	-0.0505005	-0.308096	-0.0164338	-0.33551	-0.31579	-0.0614287	0.234684	-0.000274714	-0.160673	-0.252786	-0.0184427	-0.209801	0.0666643	-0.000477	-0.374987	-0.218117	0.00374899	-0.188748	-0.309828	-0.0424761	-0.189322
APITD1	1	p36.22	ENST00000309048 //--- // APITD1 // 378708 // apoptosis-inducing, TAF9-like domain 1	0.067622	0.0639404	0.44796	0.420193	0.195629	0.335218	0.194445	0.42518	0.460198	0.58316	-0.040067	0.0396856	0.301064	0.134924	0.518508	0.539945	0.23779	0.117295	0.436099	0.100826	-0.0563156	0.365814	-0.0023208	0.261991	0.533086	0.551227	0.237283	-0.111122	0.0593456	0.19992	-0.0088876	0.299905	0.503641	0.095525	0.104585	0.271139	-0.0151096	0.252984	0.295343	-0.0633322	-0.0195682
APLF	2	p13.3	ENST00000303795 // Hs.720369 // APLF // 200558 // aprataxin and PNKP like factor	0.219757	0.179945	0.202718	0.0872975	0.119417	-0.0710711	-0.0796949	-0.245733	-0.0876695	0.210506	0.240373	-0.0192814	0.0621447	0.0179746	0.110675	0.244823	0.0418167	0.11738	0.095943	0.0064457	-0.0590247	-0.125394	0.178676	0.0782291	0.0887614	-0.0656311	-0.114996	-0.0614775	-0.00799922	0.041881	-0.0512112	0.0633498	0.0636276	0.0338648	0.0207291	0.067962	0.191574	0.0637587	0.119042	-0.0527781	-0.0139565
APLN	X	q26.1	ENST00000307484 // Hs.303084 // APLN // 8862 // apelin	-0.776412	-0.729174	-0.420156	0.112194	-0.904165	-0.40372	-0.364505	-0.115168	-0.0426786	-0.704587	0.312452	0.0398526	0.0885189	0.0332908	0.488462	-0.825237	0.26892	0.441927	0.112167	-0.0150248	-0.0218123	0.0409562	0.246013	-0.400102	0.453756	0.0103339	-0.273587	0.0146479	0.112315	0.217682	0.0204111	-0.114228	0.0919013	-0.625527	0.0550957	-0.175304	0.263969	0.309874	-0.803615	-0.0146195	0.235525
APLNR	11	q12.1	ENST00000326830 // Hs.438311 // APLNR // 187 // apelin receptor	-0.286847	-0.286851	0.144872	-0.511343	-0.367673	0.121778	-0.0872361	-0.354851	-0.0531246	0.113981	0.0364411	-0.20061	-0.104662	0.135532	0.200549	0.0861379	-0.209072	0.110955	-0.480642	-0.114115	-0.0445442	-0.359681	0.0267232	0.149214	0.203224	-0.0770846	0.00993788	-0.048705	-0.185839	-0.224963	0.010187	0.206877	-0.475219	0.04456	0.0623996	0.0651248	0.0200541	-0.188149	-0.3445	-0.0440329	-0.16136
APLP1	19	q13.12	ENST00000221891 // Hs.74565 // APLP1 // 333 // amyloid beta (A4) precursor-like protein 1	0.187379	0.166347	0.0258944	0.142501	0.208039	0.129829	0.177571	0.443573	1.02759	0.1682	0.0730303	0.0908088	0.198954	0.0811265	0.265203	0.210728	0.329027	0.368637	0.152323	0.21958	0.0909837	0.527322	0.0438744	0.129175	0.300277	1.03189	0.00397053	0.279237	0.118088	0.368569	0.261205	0.14964	0.0799022	0.960701	0.19268	0.142378	0.0397478	0.321311	0.190741	0.235006	-0.0131434
APLP2	11	q24.3	ENST00000263574 // Hs.370247 // APLP2 // 334 // amyloid beta (A4) precursor-like protein 2	-0.218523	-0.207513	-0.0222172	0.0546617	0.0882499	0.169543	-0.0292301	-0.119591	0.0767938	0.392776	-0.0167429	-0.221475	-0.117482	0.249089	0.693779	0.314152	0.0655986	0.513508	0.0730061	-0.0923155	0.056075	-0.238133	-0.024633	0.120895	0.522983	0.00719009	0.0160046	0.288625	-0.197141	0.0928702	0.309285	-0.173048	0.0772605	0.0850063	0.183444	-0.214458	-0.0339538	0.0839318	-0.0274595	0.288739	-0.153926
APOA1	11	q23.3	ENST00000375320 // Hs.93194 // APOA1 // 335 // apolipoprotein A-I	-0.134899	-0.118333	0.0847766	0.468661	0.0853528	0.339858	0.153296	-0.244265	0.1029	0.324542	0.0552778	-0.102425	0.0117502	-0.0860628	0.61642	0.349306	0.0843834	0.264944	0.545291	0.0712042	-0.0354454	-0.311291	0.101103	-0.260835	0.381754	0.066421	0.134263	0.0164578	0.017394	0.119379	0.048208	-0.050577	0.430832	0.114687	-0.107295	-0.1207	-0.077801	0.165441	0.018428	0.0576748	0.009448
APOA1BP	1	q23.1	ENST00000368233 // Hs.528320 // APOA1BP // 128240 // apolipoprotein A-I binding protein	0.236356	0.233426	0.0909127	0.006537	0.147152	-0.084537	-0.043016	0.266164	0.251328	0.158756	0.0417783	0.0912103	0.553937	0.112296	0.32335	0.0732277	0.348471	0.252371	0.041927	0.0533347	0.153484	0.376675	0.113625	0.14604	0.312996	0.253508	-0.0308487	0.68193	-0.0140577	0.471682	0.567808	0.0836687	0.0417417	0.185388	0.113626	0.206034	0.044323	0.526262	0.205564	0.521581	0.0301133
APOA4	11	q23.3	ENST00000357780 // Hs.1247 // APOA4 // 337 // apolipoprotein A-IV	-0.213248	-0.337957	0.0765983	0.529805	0.100314	0.212097	0.152099	-0.241743	-0.0106405	0.0273842	0.152999	-0.138083	-0.140827	-0.304173	0.417037	0.0377393	0.0839725	0.122945	0.419215	0.0252445	-0.004058	-0.297487	0.0722913	-0.335612	0.303485	0.032095	0.0253745	0.108676	-0.142825	-0.0405315	0.061328	-0.191624	0.404674	-0.012338	-0.332807	-0.22232	0.16353	0.0205445	-0.0593057	0.0271585	0.0070325
APOA5	11	q23.3	ENST00000227665 // UTR-3 // 0 // Hs.283923 // APOA5 // 116519 // apolipoprotein A-V	-0.34359	-0.479109	0.050232	0.248945	-0.0262055	0.148727	-0.092994	-0.221985	-0.04243	0.0329455	-0.124159	-0.121955	-0.124285	-0.27667	0.467131	0.0401185	0.0225895	0.117213	0.186165	-0.0479	-0.108521	-0.332346	-0.194545	-0.297892	0.202882	-0.047436	-0.174152	-0.0973385	-0.331146	-0.0578735	-0.02384	-0.196843	0.23888	0.021578	-0.362394	-0.32946	-0.068243	-0.102168	-0.127428	-0.091974	-0.231422
APOB	2	p24.1	ENST00000233242 // Hs.120759 // APOB // 338 // apolipoprotein B (including Ag(x) antigen)	0.0223904	0.0306918	-0.0994306	0.0815786	-0.217212	-0.0183998	0.0237924	0.115022	-0.0801762	0.149701	0.274258	0.0162805	0.140682	-0.0186631	0.116495	0.136909	0.0712443	0.13063	0.136068	0.0449788	-0.0183554	0.0787602	0.25363	-0.408391	0.140443	-0.0598805	-0.0101307	0.0139357	0.0186015	0.114602	-0.0228146	0.394833	0.0783679	0.0595319	-0.207935	0.331107	0.258602	0.122472	-0.186266	-0.0405042	0.0401685
APOBEC1	12	p13.31	ENST00000229304 // Hs.560 // APOBEC1 // 339 // apolipoprotein B mRNA editing enzyme, catalytic polypeptide 1	0.200226	0.298624	0.33568	-0.389299	0.243501	-0.367812	-0.350501	-0.368257	-0.202139	0.556589	0.410263	-0.0115473	-0.347772	-0.323644	-0.294727	0.510702	0.18778	-0.357783	-0.323393	-0.121728	-0.0539465	-0.419072	0.403224	0.118969	-0.358006	-0.152385	-0.201387	-0.095661	0.0108455	0.186947	-0.023753	0.369454	-0.316084	-0.259622	-0.260439	0.432384	0.339588	0.162241	0.289701	-0.0105618	-0.0311066
APOBEC2	6	p21.1	ENST00000244669 // Hs.555915 // APOBEC2 // 10930 // apolipoprotein B mRNA editing enzyme, catalytic polypeptide-like 2	0.0708844	0.0410485	0.0630465	0.054209	0.213347	-0.00750673	-0.0449423	0.00962409	0.0834688	0.0797048	-0.312311	-0.0467052	-0.114146	0.235315	-0.401363	0.156976	0.13766	-0.455508	0.0486795	0.083949	0.0122224	0.103396	-0.329588	0.288214	-0.395077	0.200416	-0.116486	0.0667622	-0.0202003	0.176013	-0.0804823	0.270005	0.012857	0.355457	0.0806706	0.319746	-0.37054	0.253733	0.186084	-0.00305236	-0.0201905
APOBEC3A	22	q13.1	ENST00000249116 // Hs.226307 // APOBEC3A // 200315 // apolipoprotein B mRNA editing enzyme, catalytic polypeptide-like 3A	-0.662923	-0.57023	-0.245401	0.103069	-0.613978	-0.108702	-0.161966	-0.253439	-0.134069	-0.420204	0.512002	-0.471409	0.0400148	-0.403257	-0.43098	-0.454608	-0.172542	-0.320446	0.137232	-0.19141	-0.0766563	-0.361687	0.0479123	-0.157526	-0.461271	-0.141892	-0.339852	-0.151986	-0.460061	-0.335262	-0.0947027	-0.270511	0.119028	-0.185748	-0.392275	-0.199749	0.320266	-0.266696	-0.6089	-0.0336777	-0.370564
APOBEC3C	22	q13.1	ENST00000361441 // Hs.441124 // APOBEC3C // 27350 // apolipoprotein B mRNA editing enzyme, catalytic polypeptide-like 3C	-0.233261	-0.174359	-0.145584	0.0855609	-0.045824	-0.114265	-0.170394	-0.224672	-0.122399	-0.223449	0.4535	-0.240548	-0.140022	-0.207685	-0.156433	-0.109687	-0.132867	-0.189317	0.0885415	-0.15076	-0.0941225	-0.180956	0.0507974	-0.0441611	-0.270273	-0.161077	-0.142215	-0.0985754	-0.199626	0.0574218	-0.0546709	-0.125977	0.135964	-0.164035	-0.177425	-0.0813427	0.13282	-0.147841	-0.0790693	-0.120898	-0.139859
APOBEC3D	22	q13.1	ENST00000216099 // Hs.658626 // APOBEC3D // 140564 // apolipoprotein B mRNA editing enzyme, catalytic polypeptide-like 3D	-0.274251	-0.318395	-0.345303	-0.0395402	-0.076303	-0.225661	-0.174144	-0.219496	-0.161503	-0.122288	0.795668	-0.469555	-0.240497	-0.273597	-0.183542	-0.468029	-0.184912	-0.234782	-0.125	-0.0989214	-0.0471538	-0.297573	0.225272	-0.294019	-0.370939	-0.13544	-0.0670086	-0.268901	-0.45519	-0.325904	-0.173363	-0.178066	0.131437	-0.341311	-0.199508	-0.109481	0.260739	-0.315958	-0.189556	-0.219532	-0.319754
APOBEC3G	22	q13.1	ENST00000452957 // Hs.660143 // APOBEC3G // 60489 // apolipoprotein B mRNA editing enzyme, catalytic polypeptide-like 3G	-0.337126	-0.311211	-0.26957	0.117242	0.0220637	-0.126276	-0.051607	-0.267434	-0.137234	-0.209342	1.05709	-0.530716	-0.215177	-0.449629	-0.425131	-0.252884	-0.201513	-0.310347	0.128396	-0.0141755	-0.057849	-0.323888	0.36478	-0.159696	-0.346901	-0.110124	-0.201772	-0.0452787	-0.459645	-0.306329	-0.0357174	-0.215885	0.0726211	-0.177435	-0.317063	-0.122728	0.570499	-0.305197	-0.0366192	-0.106161	-0.390674
APOBEC3H	22	q13.1	ENST00000421988 // Hs.440515 // APOBEC3H // 164668 // apolipoprotein B mRNA editing enzyme, catalytic polypeptide-like 3H	-0.372004	-0.349116	-0.34929	0.136442	-0.0990226	-0.16715	-0.105774	-0.334637	-0.188008	-0.17593	0.609515	-0.514653	-0.295008	-0.425203	-0.343989	-0.285794	-0.287932	-0.306951	0.102185	-0.178208	-0.0771016	-0.316253	0.281834	-0.17295	-0.408803	-0.123145	-0.235085	-0.116055	-0.535138	-0.324363	-0.120338	-0.214304	0.106919	-0.220205	-0.31698	-0.0778453	0.367147	-0.325291	-0.107878	-0.0984756	-0.472314
APOBR	16	p11.2	ENST00000328423 // Hs.200333 // APOBR // 55911 // apolipoprotein B receptor	-0.01962	-0.249107	0.322881	0.036531	-0.0610655	-0.136436	-0.129333	0.314754	-0.151133	-0.177424	0.0379115	0.086306	-0.0128425	-0.052213	-0.0389845	-0.11188	-0.0428125	0.34062	0.0128385	0.184736	-0.097344	0.0370265	0.210779	0.030059	0.374942	-0.194737	0.012615	-0.255728	0.128514	-0.174556	-0.0423765	0.282657	-0.05572	-0.346882	0.31555	0.315798	-0.03631	-0.163702	0.0017265	-0.126233	-0.182075
APOC1	19	q13.32	ENST00000252491 // Hs.110675 // APOC1 // 341 // apolipoprotein C-I	0.364448	0.32847	0.301069	-0.125651	0.272727	0.116	0.130794	0.0383604	0.0567313	0.249706	-0.318074	0.0221854	0.0420714	0.0997671	0.196079	0.0289347	0.160785	-0.247344	-0.266832	0.0320389	-0.0185179	-0.0111397	-0.28282	0.068981	-0.0386076	0.0826763	0.0309999	-0.230088	0.0572944	0.0627233	-0.0406917	0.311963	-0.22649	-0.000604143	0.20952	0.173862	-0.158882	0.14481	0.372384	-0.0401467	-0.0221094
APOC2	19	q13.32	ENST00000419266 // Hs.75615 // APOC2 // 344 // apolipoprotein C-II	0.429022	0.381816	0.342753	-0.012663	0.470029	0.184445	0.254433	0.202805	0.24017	0.247013	-0.28623	0.151234	0.102995	0.0990069	0.315834	0.0792608	0.246397	-0.175187	-0.182754	0.184057	0.035681	0.195371	-0.149961	0.167966	0.0942277	0.227214	0.038499	-0.0626788	0.154863	0.212607	0.0048625	0.40428	-0.192944	0.0999844	0.200651	0.339012	-0.0793883	0.255507	0.450069	0.000490833	0.107726
APOE	19	q13.32	ENST00000252486 // Hs.654439 // APOE // 348 // apolipoprotein E	0.492032	0.39267	0.292186	-0.0399487	0.422245	0.241169	0.248828	0.122052	0.194439	0.257959	-0.323026	0.101721	0.0954715	0.105707	0.360353	0.251198	0.28686	-0.260219	-0.277314	0.123994	0.00757483	0.0960265	-0.169402	0.240736	0.0433965	0.181556	0.0222705	-0.0768355	0.0806007	0.247563	-0.010646	0.37159	-0.18598	0.161893	0.221073	0.266549	-0.140848	0.26851	0.37208	-0.0864693	0.012212
APOF	12	q13.3	ENST00000541105 // Hs.534302 // APOF // 319 // apolipoprotein F	-0.152188	-0.130049	-0.0492113	-0.403926	-0.103299	-0.00535333	-0.0719397	-0.0352687	0.139303	-0.511069	0.123136	-0.0375188	-0.171758	-0.0712838	-0.179328	-0.394845	-0.0383907	-0.167912	-0.309022	-0.0247745	-0.0337102	0.0981318	-0.0966987	-0.119173	-0.144314	0.150812	-0.145537	-0.0598255	-0.0355693	-0.275223	-0.0502137	-0.0344873	-0.258948	-0.0588892	0.0275612	0.021963	-0.0160815	-0.152921	-0.008937	-0.150722	0.015328
APOH	17	q24.2	ENST00000205948 // Hs.445358 // APOH // 350 // apolipoprotein H (beta-2-glycoprotein I)	0.368714	0.334324	0.329375	0.107161	0.152455	0.375997	0.207514	0.179582	-0.709152	-0.18121	-0.0146754	0.540624	-0.0916114	0.00775273	-0.399935	-0.14293	0.0299537	-0.449073	0.09498	0.00124449	-0.0397631	0.123248	0.0389481	0.0744647	-0.419977	-0.730636	0.212046	-0.168578	0.474117	0.00187739	-0.0327159	0.373611	0.195313	-0.0796224	0.0171949	0.366428	0.0720838	-0.085807	0.227159	-0.0501892	0.488526
APOL1	22	q12.3	ENST00000319136 // Hs.114309 // APOL1 // 8542 // apolipoprotein L, 1	-0.318109	-0.339561	-0.159786	0.0750262	-0.00361528	0.00317233	0.0675723	-0.261877	-0.0327294	-0.112197	-0.269158	-0.450651	0.0295569	-0.363597	-0.299704	-0.200189	-0.172893	-0.308027	0.138653	-0.0637257	-0.000402222	-0.222538	0.0245666	-0.140829	-0.301556	-0.033799	-0.104852	-0.0257676	-0.39566	-0.213662	-0.0420019	-0.139643	0.0903884	-0.221015	-0.321662	-0.213962	-0.0585984	-0.176866	-0.00807306	-0.0880248	-0.320012
APOL2	22	q12.3	ENST00000249066 // Hs.474740 // APOL2 // 23780 // apolipoprotein L, 2	-0.221395	-0.267077	-0.162922	0.0457915	-0.0514422	-0.0631289	-0.0446354	-0.347148	0.00592976	-0.172601	-0.320739	-0.43732	-0.0649889	-0.373626	-0.3296	-0.193016	-0.138207	-0.278515	0.150996	-0.102951	-0.0760425	-0.352813	0.00847204	-0.217515	-0.325425	-0.0105811	-0.165686	0.0112166	-0.437838	-0.162894	-0.0128312	-0.135364	0.0692823	-0.196491	-0.37267	-0.214502	-0.0388898	-0.0960502	-0.0573662	-0.0439478	-0.338281
APOL3	22	q12.3	ENST00000349314 // Hs.474737 // APOL3 // 80833 // apolipoprotein L, 3	-0.334623	-0.30413	-0.258746	-0.0570533	-0.06492	-0.0542631	-0.0710799	-0.349596	-0.0826003	-0.236375	-0.390879	-0.531536	-0.0840304	-0.472858	-0.384572	-0.210682	-0.220217	-0.418876	0.0241781	-0.0939765	-0.0107564	-0.408682	-0.0292524	-0.172476	-0.415932	-0.0931739	-0.181206	-0.0629583	-0.518384	-0.293171	-0.0735029	-0.292616	-0.010646	-0.246064	-0.426501	-0.281455	-0.0697738	-0.25266	-0.0470729	-0.0412037	-0.441525
APOL4	22	q12.3	ENST00000328429 // Hs.115099 // APOL4 // 80832 // apolipoprotein L, 4	-0.243205	-0.221685	-0.254203	0.00846225	-0.08508	-0.0990935	-0.0779581	-0.378157	0.0674979	-0.15567	-0.413731	-0.505196	-0.185222	-0.474023	-0.300305	-0.165798	-0.13464	-0.334382	0.0752281	-0.19259	-0.0023915	-0.422311	-0.0131575	-0.124821	-0.344969	0.0551558	-0.240489	0.0532857	-0.461558	-0.172708	0.0103965	-0.214811	0.00727763	-0.129755	-0.373138	-0.214639	-0.085843	-0.180813	0.0315168	-0.0145654	-0.360249
APOL5	22	q12.3	ENST00000249044 // Hs.326561 // APOL5 // 80831 // apolipoprotein L, 5	-0.310639	-0.405801	-0.17557	-0.0266905	-0.110496	-0.0936301	0.00594926	-0.315803	-0.00667853	-0.243396	-0.319202	-0.528151	-0.149641	-0.444873	-0.51249	-0.238826	-0.186515	-0.468732	0.0417906	-0.153378	-0.0104019	-0.412307	-0.0562858	-0.183692	-0.563426	-0.0497828	-0.136049	-0.0593655	-0.582462	-0.291008	-0.113626	-0.17728	0.00575516	-0.178847	-0.209406	-0.205525	-0.110443	-0.343799	-0.0955574	-0.0226654	-0.423467
APOL6	22	q12.3	ENST00000409652 // Hs.257352 // APOL6 // 80830 // apolipoprotein L, 6	-0.266279	-0.264841	-0.18257	-0.0166196	-0.0190211	-0.0418569	0.0207606	-0.402242	-0.116387	-0.118698	-0.360319	-0.537873	-0.134974	-0.431765	-0.394648	-0.215899	-0.212954	-0.42378	0.106914	-0.132116	-0.0257702	-0.378438	-0.0417496	-0.129938	-0.450719	-0.104044	-0.110894	-0.0303849	-0.514765	-0.27611	-0.0601597	-0.189966	0.0680855	-0.262539	-0.350415	-0.225274	-0.0903838	-0.236232	0.00419282	-0.001049	-0.435429
APOLD1	12	p13.1	ENST00000326765 // Hs.23388 // APOLD1 // 81575 // apolipoprotein L domain containing 1	0.291845	0.318023	0.292634	-0.463364	0.278887	-0.384958	-0.341799	-0.343848	-0.138592	0.895954	0.398282	-0.0217523	-0.218932	-0.254439	-0.34636	0.861033	0.100218	-0.388739	-0.410057	-0.10642	-0.0454594	-0.349289	0.353362	0.136235	-0.329532	-0.0930754	-0.245196	-0.0702688	-0.0163561	0.060219	-0.0299234	0.316573	-0.432375	-0.212372	-0.252138	0.351936	0.298986	0.0462756	0.256187	-0.0120579	-0.0139363
APOM	6	p21.33	ENST00000375916 // Hs.534468 // APOM // 55937 // apolipoprotein M	0.0514955	-0.06626	-0.080208	0.497394	0.00076	-0.0150765	-0.023809	0.036842	0.464711	0.26881	-0.181714	0.0757555	-0.037137	0.247632	-0.161393	0.114492	0.178547	-0.135672	0.583183	0.054121	0.161353	0.141047	-0.337088	0.405066	-0.187143	0.458906	-0.127081	0.429918	0.095458	0.203787	0.463996	-0.0663435	0.519231	0.479505	0.272044	-0.088674	-0.27384	0.14275	-0.0064115	0.397359	0.027676
APOO	X	p22.11	ENST00000379220 // Hs.495851 // APOO // 79135 // apolipoprotein O	-0.698709	-0.649431	-0.615906	-0.459891	-0.737755	-0.328586	-0.270026	0.0590111	-0.152361	-0.651855	0.269309	-0.529862	-0.0852154	-0.43241	0.206295	-0.786427	0.0366784	0.189552	-0.434599	0.0418907	-0.159382	0.143347	0.232712	-0.33244	0.157483	-0.153703	-0.244588	-0.636901	-0.525284	-0.00894857	-0.54143	-0.60507	-0.390922	-0.630192	-0.291117	-0.556061	0.235227	-0.108218	-0.675267	-0.51633	-0.422665
APOOL	X	q21.1	ENST00000373169 // Hs.512181 // APOOL // 139322 // apolipoprotein O-like	-0.240085	-0.181264	-0.385577	0.183851	-0.279481	0.228054	0.199599	-0.0231906	-0.0544786	-0.181332	0.24501	-0.313954	0.0504698	0.0173895	0.0961232	-0.220471	0.227591	0.0447937	0.170721	-0.0397809	-0.217368	0.0985928	0.222386	-0.410861	0.0532153	-0.0435718	0.074832	-0.69708	-0.218969	0.162211	-0.586296	0.182257	0.140187	-0.55568	0.0434298	0.13019	0.205422	0.239553	-0.253959	-0.570221	0.0684392
APP	21	q21.3	ENST00000346798 // Hs.434980 // APP // 351 // amyloid beta (A4) precursor protein	-0.0133603	-0.0208126	-0.282611	0.397842	-0.0461639	-0.0775095	-0.0443195	0.167832	-0.116098	-0.215052	-0.310459	-0.275614	0.25219	0.0314698	0.107592	-0.251267	-0.249703	0.0887974	0.371274	-0.0441665	-0.0641687	0.0907006	-0.0526822	0.118298	0.10625	-0.0870349	-0.129874	-0.076645	-0.272026	-0.292866	-0.0600925	-0.254346	0.356225	-0.0876528	0.0187435	-0.260632	-0.0950385	-0.266046	-0.0299201	-0.0488988	-0.356016
APPBP2	17	q23.2	ENST00000083182 // Hs.84084 // APPBP2 // 10513 // amyloid beta precursor protein (cytoplasmic tail) binding protein 2	0.0283372	0.00139101	0.268992	-0.425896	0.105437	0.316098	0.149845	0.44402	-0.122865	-0.203701	-0.0422147	0.970654	0.501633	0.0132508	-0.371096	-0.1074	0.00379803	-0.356556	-0.385393	0.111724	-0.0502289	0.399564	0.0176418	0.0593135	-0.375208	-0.143119	0.159132	-0.163493	0.9157	-0.00146433	-0.0906756	0.280309	-0.299041	-0.095759	0.0501004	0.290632	0.0537912	-0.0822153	0.181611	-0.0492976	0.864802
APPL1	3	p14.3	ENST00000288266 // Hs.476415 // APPL1 // 26060 // adaptor protein, phosphotyrosine interaction, PH domain and leucine zipper containing 1	0.0515988	0.0712342	-0.139099	-0.225556	0.00105338	-0.00760309	-0.028007	0.0931007	-0.0826673	-0.167225	0.0600851	-0.281964	0.161295	0.0764698	0.121645	-0.243257	-0.210962	0.0920867	-0.0290718	-0.0159046	-0.0317202	0.149318	0.275929	0.122415	0.164287	-0.0943879	-0.0868666	-0.0994067	-0.276354	-0.286484	-0.063142	-0.227121	0.0863808	-0.207563	0.053637	-0.251325	0.0774184	-0.279701	0.009427	-0.0269356	-0.21816
APPL2	12	q23.3	ENST00000258530 // Hs.506603 // APPL2 // 55198 // adaptor protein, phosphotyrosine interaction, PH domain and leucine zipper containing 2	-0.230702	-0.242074	-0.263838	0.120859	-0.35041	0.521137	0.541881	-0.0171135	0.261157	0.0553248	0.0269559	-0.0441944	-0.112794	-0.0251116	-0.41562	0.0351336	-0.190782	-0.45059	0.115819	-0.0634565	0.029451	-0.051482	0.000703559	0.0214668	-0.388273	0.240884	0.326034	-0.00756314	-0.00744054	-0.279513	-0.0504421	-0.24403	0.0665775	-0.204012	-0.00453046	-0.237099	0.0844143	-0.194792	-0.3139	-0.0289971	-0.0271234
APTX	9	p21.1	ENST00000309615 // Hs.20158 // APTX // 54840 // aprataxin	-0.270077	-0.246839	-0.168076	0.0790842	-0.308339	-0.00836473	0.223025	0.288347	-0.0762062	-0.167369	0.394595	-0.218793	-0.00185079	-0.00185386	0.413067	-0.185962	0.246043	0.338991	0.0979901	0.0352197	-0.0320144	0.258008	0.204113	0.018418	0.416614	-0.0968093	0.00542104	-0.00551638	-0.191265	0.25253	-0.00943963	-0.18392	0.0519449	-0.238886	0.0730539	-0.177999	0.167606	0.240152	-0.282742	-0.0285922	-0.0624348
AQP1	7	p14.3	ENST00000265298 // Hs.76152 // AQP1 // 358 // aquaporin 1 (Colton blood group)	-0.253278	0.0328117	-0.265374	-0.540525	-0.358577	0.302323	0.211457	-0.317139	-0.0604406	0.317527	0.0380096	0.0556012	0.0832098	0.118966	0.522639	0.381894	0.058937	0.502217	-0.44376	-0.0134225	0.0786269	0.0120389	0.0356371	0.16355	0.526545	-0.00946072	0.0559181	0.470588	0.0449196	0.0751111	0.351108	-0.195324	-0.473819	0.0587349	0.124137	-0.168096	0.0161208	0.148568	-0.244392	0.326614	0.0360925
AQP10	1	q21.3	ENST00000355197 // Hs.259048 // AQP10 // 89872 // aquaporin 10	0.269053	0.219979	0.152632	0.0258524	0.240342	-0.0390617	-0.0143505	0.174917	0.212666	0.397746	0.0141757	-0.0128258	0.447964	0.0323692	0.491642	0.366878	0.0575616	0.496414	-0.000218474	-0.0199166	0.1538	0.178828	0.0567987	0.105338	0.489969	0.165749	-0.0550644	0.474472	0.0366348	0.0280491	0.461927	0.0919816	0.0457123	0.021345	0.108045	0.175854	-0.00312737	-0.0609582	0.216977	0.48995	0.0638631
AQP11	11	q14.1	ENST00000313578 // Hs.503345 // AQP11 // 282679 // aquaporin 11	0.183999	0.180147	-0.13321	0.791541	0.34614	0.161956	0.00965628	-0.220552	-0.0125042	0.268441	-0.0293441	-0.214558	0.490322	0.0993422	0.105571	0.223087	0.0593321	-0.356865	0.744761	-0.105167	-0.0365212	-0.295049	-0.0691731	0.129991	-0.129169	-0.0115512	-0.000608167	-0.0963756	-0.208648	-0.0256499	0.0200488	-0.18503	0.786987	-0.0139303	0.0885833	-0.0514755	-0.114751	-0.0239371	0.35444	-0.0673706	-0.213806
AQP12A	2	q37.3	ENST00000460527 // Hs.534650 // AQP12A // 375318 // aquaporin 12A	-0.116591	-0.108869	-0.201853	-0.397837	-0.111629	-0.681644	-0.581842	-0.136518	-0.141408	-0.297074	-0.129621	-0.332062	0.123174	0.21774	-0.67382	-0.610565	-0.385095	-0.506689	-0.308105	0.0476539	0.0715614	-0.11137	-0.0744629	-0.337283	-0.562316	-0.0885579	-0.469121	0.454899	-0.364851	-0.693881	0.466545	-0.161909	-0.279849	0.0124556	0.150029	-0.166124	-0.179953	-0.525799	-0.267903	0.353492	-0.190586
AQP2	12	q13.12	ENST00000551526 // Hs.130730 // AQP2 // 359 // aquaporin 2 (collecting duct)	0.040149	0.0624753	-0.165856	-0.522777	0.019184	0.467705	0.512674	-0.0301833	-0.0688225	-0.198254	-0.353237	0.0272073	-0.108233	-0.424086	-0.356718	-0.193448	-0.13773	-0.321731	-0.421146	0.00556119	-0.0651687	0.0313941	-0.262772	-0.449373	-0.277928	-0.0279969	0.291385	-0.00580326	0.0679636	-0.234009	-0.00631761	-0.178516	-0.533765	-0.26632	-0.385485	-0.193047	-0.166945	-0.150669	0.0171882	-0.0660223	0.0226739
AQP3	9	p13.3	ENST00000297991 // UTR-3 // 0 // Hs.234642 // AQP3 // 360 // aquaporin 3 (Gill blood group)	-0.239101	-0.257453	-0.171308	0.050003	-0.402421	-0.0419149	0.171643	0.193339	-0.146666	-0.196553	0.414168	-0.207369	0.411601	0.0261231	0.194666	-0.271439	0.239617	0.0824818	0.0779574	-0.000242273	-0.022982	0.173679	0.26514	0.0403374	0.164584	-0.126662	0.0628022	-0.0879106	-0.193268	0.300976	-0.0257535	-0.149127	0.0773116	-0.291028	0.108529	-0.208044	0.167715	0.227092	-0.395093	-0.0121583	-0.0630171
AQP4	18	q11.2	ENST00000383168 // Hs.315369 // AQP4 // 361 // aquaporin 4	-0.188703	-0.211524	0.0578201	1.18218	-0.353914	-0.00231346	0.220797	0.223377	0.579913	0.468433	-0.305776	-0.193682	-0.079579	-0.385884	0.172768	0.503919	-0.177316	0.459956	1.14676	0.0272363	-0.0304393	0.209065	0.109003	-0.330231	0.334014	0.565462	0.00833867	-0.0122582	-0.227571	-0.216817	0.00383871	0.135635	1.15134	0.543622	-0.349044	0.164292	-0.0553108	-0.194959	-0.261004	-0.0152618	-0.218689
AQP5	12	q13.12	ENST00000293599 // UTR-3 // 0 // Hs.298023 // AQP5 // 362 // aquaporin 5	0.10292	0.0110203	-0.1513	-0.310559	-0.116674	0.428966	0.47531	-0.0933354	0.0106689	-0.0881309	-0.291591	-0.005044	-0.0157164	-0.325917	-0.24513	-0.146449	-0.172305	-0.29296	-0.413401	-0.041532	-0.139925	-0.129755	-0.274826	-0.303615	-0.183489	0.0318274	0.234119	-0.0815287	-0.00612457	-0.319061	0.044359	-0.0951394	-0.315232	-0.167134	-0.444064	-0.227007	-0.2085	-0.174361	-0.0279731	-0.0307403	0.0359474
AQP6	12	q13.12	ENST00000315520 // UTR-5 // 0 // Hs.54505 // AQP6 // 363 // aquaporin 6, kidney specific	-0.219898	-0.348203	-0.140434	-0.348174	-0.177766	0.0209905	-0.038437	-0.035998	-0.0565495	-0.328556	-0.504486	-0.094338	-0.160342	-0.441236	-0.19954	-0.25104	-0.323298	-0.361174	-0.406228	-0.321019	-0.330977	-0.327479	-0.334888	-0.415448	-0.339583	-0.433385	0.044064	-0.509477	-0.075431	-0.379591	-0.203523	-0.24526	-0.374339	-0.403446	-0.433968	-0.202019	-0.412799	-0.445394	-0.190198	-0.259113	-0.055639
AQP7	9	p13.3	ENST00000297988 // Hs.455323 // AQP7 // 364 // aquaporin 7	-0.385369	-0.419855	-0.0415944	-0.0854987	-0.273767	-0.0666949	0.055771	0.113196	-0.10288	-0.16781	0.256987	-0.160381	0.0989047	-0.0778425	0.0779113	-0.136043	0.113507	-0.0405026	0.0772296	-0.0318799	-0.116705	0.0928884	0.132984	-0.0836909	0.0463822	-0.187891	-0.0640036	-0.252765	-0.207462	0.0697999	-0.0337945	-0.165996	-0.0332976	-0.265751	0.0188559	-0.236235	0.0299316	0.104786	-0.325557	-0.110858	-0.100882
AQP8	16	p12.1	ENST00000219660 // Hs.176658 // AQP8 // 343 // aquaporin 8	0.0134918	0.086675	0.257675	0.066161	0.0669325	-0.160761	-0.0852694	0.151873	-0.207492	-0.218247	-0.0511614	0.0257221	-0.146582	0.0356774	0.145234	-0.31922	-0.0187546	0.107639	0.0435558	-0.0123589	-0.0610852	0.170917	-0.0444217	0.115735	0.105754	-0.213979	-0.115344	-0.166467	-0.0328907	-0.00472167	-0.11975	0.31825	0.0251771	-0.276567	0.0994144	0.228389	-0.102359	-0.102396	0.0916957	-0.125584	-0.0194622
AQP9	15	q21.3	ENST00000219919 // Hs.104624 // AQP9 // 366 // aquaporin 9	-0.235616	-0.268279	0.327212	-0.364013	-0.250469	-0.279045	-0.293983	-0.0242835	0.293218	-0.158513	0.029859	-0.191306	-0.346872	0.125986	-0.391093	-0.101725	-0.187249	-0.422025	-0.297105	0.0533519	0.0131635	0.128312	-0.0497377	0.170732	-0.388	0.301563	-0.216928	-0.00446049	-0.157223	-0.23	-0.0108786	0.374558	-0.313291	-0.0817392	0.0822577	0.347597	-0.0882374	-0.184704	-0.160504	0.00326096	0.0362397
AQPEP	5	q23.1	ENST00000357872 // Hs.98288 // AQPEP // 206338 // laeverin	-0.265109	-0.260597	0.0595003	-0.376679	-0.353424	0.63207	0.694479	-0.252336	0.258419	0.155964	0.432027	0.00813549	-0.0634253	-0.354363	-0.449999	0.077252	-0.167367	-0.455663	-0.304108	-0.151641	0.00942933	-0.310572	0.300838	-0.36653	-0.468717	0.254621	0.447689	0.271443	0.010494	-0.194739	0.220698	0.158764	-0.322731	0.285619	-0.346286	0.120487	0.321669	-0.143265	-0.312126	0.232805	0.00312314
AQR	15	q14	ENST00000156471 // Hs.510958 // AQR // 9716 // aquarius homolog (mouse)	-0.278816	-0.293837	-0.176525	0.0970246	-0.245316	-0.380951	-0.339048	0.155207	-0.121183	-0.208684	-0.0282425	-0.226922	-0.400842	0.0443575	0.159394	-0.243803	0.083552	0.152916	-0.111457	0.0428495	-0.0040601	0.148981	-0.04496	0.118986	0.124799	-0.113818	-0.264324	-0.0299627	-0.204008	0.0994925	-0.0341824	-0.222849	-0.0276405	-0.0764597	0.0671456	-0.242087	-0.149393	0.0646207	-0.212892	-0.01242	0.0827916
AR	X	q12	ENST00000374690 // Hs.76704 // AR // 367 // androgen receptor	-0.185632	-0.141626	-0.510994	0.17388	-0.262398	0.248576	0.26479	0.0471496	-0.00999086	-0.110636	0.270548	-0.239486	0.143411	-0.394195	0.0736559	-0.134952	0.115813	0.0865944	0.164379	0.018772	-0.159946	0.141035	0.189113	-0.377549	0.0947253	-0.0101733	0.117492	-0.544431	-0.129983	-0.0323277	-0.50255	-0.134402	0.122085	-0.552957	-0.359451	-0.176198	0.224181	0.091816	-0.187912	-0.470849	0.102692
ARAF	X	p11.23	ENST00000377045 // Hs.446641 // ARAF // 369 // v-raf murine sarcoma 3611 viral oncogene homolog	-0.205279	-0.251913	-0.479577	0.104004	-0.267375	-0.341526	-0.310661	-0.123968	-0.110488	-0.102761	0.261709	-0.487565	0.0933664	-0.424277	0.140491	-0.240376	0.882675	0.119243	0.0407349	-0.00200608	-0.207084	0.0614186	0.224213	-0.391372	0.14371	-0.118414	-0.26114	-0.673824	-0.487953	0.985905	-0.575549	-0.13039	0.0882188	-0.629558	-0.406841	-0.165063	0.215074	0.882036	-0.231638	-0.564437	-0.375891
ARAP1	11	q13.4	ENST00000495878 // Hs.503165 // ARAP1 // 116985 // ArfGAP with RhoGAP domain, ankyrin repeat and PH domain 1	0.262612	0.212399	0.370911	0.40524	0.170904	0.121933	-0.0635398	-0.328895	0.0680988	0.372672	0.0653176	-0.151765	-0.130509	0.152843	0.274767	0.376341	0.115046	-0.268238	0.43734	-0.0962149	0.0188266	-0.363449	0.0524664	0.130543	0.00619241	0.0556073	0.0128711	0.102729	-0.153579	0.0742423	0.138215	0.384612	0.355932	0.0770955	0.0974962	0.32533	0.0316479	0.136201	0.288054	0.116867	-0.118505
ARAP2	4	p14	ENST00000303965 // Hs.479451 // ARAP2 // 116984 // ArfGAP with RhoGAP domain, ankyrin repeat and PH domain 2	-0.304211	-0.268196	-0.287659	-0.471349	-0.357059	0.163049	0.182587	0.165899	-0.104591	-0.637699	-0.336689	-0.0541546	-0.148705	-0.437335	-0.442341	-0.730308	0.0431384	-0.466393	-0.438927	-0.0217274	-0.0567485	0.176165	-0.300085	-0.417963	-0.456107	-0.10443	0.0537107	-0.0773271	-0.0498448	0.090871	-0.0933624	-0.244193	-0.392444	-0.234264	-0.483351	-0.278007	-0.370706	0.137036	-0.323251	-0.0896403	-0.0157248
[truncated: 15,544 more rows]
